# Supplementary material for: Convergent recruitment of TALE homeodomain life cycle regulators to direct sporophyte development in land plants and brown algae
Source: eLife. 2019 Jan 15;8:e43101. doi: 10.7554/eLife.43101 (PMC6368402; doi:10.7554/eLife.43101)
Supplement: Supplementary file 1. [file elife-43101-supp1.xlsx]

## Sheet: Table S1. Ectocarpus strains
Supplementary Table S1. Ectocarpus strains used in this study.
CCAP, Culture Collections of Algae and Protozoa (marine) reference number, Dunstaffnage Marine Laboratory, Oban, Scotland; GA, gametophyte; SP, sporophyte; sam, samsara mutation; oro, ouroboros mutation; imm, immediate upright mutation; m, male; f, female; WT, wild type; UV, ultra-violet; n/a, not applicable.
Name	CCAP strain code	Description	Generation, sex	Genotype	Life history phenotype	Reference
Ec32	CCAP 1310/4	Genome sequence strain, meiotic offspring from Ec17	GA m	wild type	Wild type	Peters et al., 2008
Ec568	CCAP 1310/334	Wild type outcrossing line	GA f	wild type	Wild type	Heesch et al., 2010
Ec25	CCAP 1310/3	Wild type strain, sister of Ec32	GA f	wild type	Wild type	Peters et al., 2008
Ec87	n/a	Wild type strain, sister of Ec32	GA f	wild type	Wild type	This study
Ec343	n/a	Wild type outcrossing line, sister of Ec568	GA f	wild type	Wild type	This study
Ec494	n/a	UV-mutagenized Ec32	GA m	oro	Reiterates GA	Coelho et al., 2011
Ec374	n/a	UV-mutagenized Ec32	GA m	sam-1	Reiterates GA	This study
Ec364	n/a	UV-mutagenized Ec32	GA m	sam-2	Reiterates GA	This study
Ec793	n/a	UV-mutagenized Ec32	GA m	sam-3	Reiterates GA	This study
Ec557	n/a	Derived from cross Ec25 WT x Ec494 oro	SP	ORO/oro	Wild type SP	Coelho et al., 2011
Ec698	n/a	Derived from cross Ec560 oro x Ec32 WT	SP	oro/ORO	Wild type SP	This study
Ec560	n/a	Meiotic offspring of SP Ec557	GA f	oro	Reiterates GA	Coelho et al., 2011
Ec768	n/a	Derived from cross Ec568 WT x Ec374 sam-1	SP	SAM/sam-1	SP morphology, unilocular sporangia abort	This study
Ec769	n/a	Derived from cross Ec568 WT x Ec374 sam-1	SP	SAM/sam-1	SP morphology, unilocular sporangia abort	This study
Ec832	n/a	Derived from cross Ec87 WT x Ec364 sam-2	SP	SAM/sam-2	SP morphology, unilocular sporangia abort	This study
Ec833	n/a	Derived from cross Ec87 WT x Ec364 sam-2	SP	SAM/sam-2	SP morphology, unilocular sporangia abort	This study
Ec818	n/a	Derived from cross Ec343 WT x Ec793 sam-3	SP	SAM/sam-3	SP morphology, unilocular sporangia abort	This study
Ec819	n/a	Derived from cross Ec343 WT x Ec793 sam-3	SP	SAM/sam-3	SP morphology, unilocular sporangia abort	This study
Ec770	n/a	Derived from cross Ec560 oro x Ec374 sam-1	SP	oro/ORO SAM/sam-1	SP morphology, unilocular sporangia abort	This study
Ec771	n/a	Derived from cross Ec560 oro x Ec374 sam-1	SP	oro/ORO SAM/sam-1	SP morphology, unilocular sporangia abort	This study
Ec245	n/a	Derived from cross Ec560 oro x Ec364 sam-2	SP	oro/ORO SAM/sam-2	SP morphology, unilocular sporangia abort	This study
Ec738	n/a	Derived from cross Ec560 oro x Ec364 sam-2	SP	oro/ORO SAM/sam-2	SP morphology, unilocular sporangia abort	This study
Ec820	n/a	Derived from cross Ec560 oro x Ec793 sam-3	SP	oro/ORO SAM/sam-3	SP morphology, unilocular sporangia abort	This study
Ec821	n/a	Derived from cross Ec560 oro x Ec793 sam-3	SP	oro/ORO SAM/sam-3	SP morphology, unilocular sporangia abort	This study
Ec137	n/a	Original immediate upright mutant isolate	GA m	imm	Wild type GA	Peters et al., 2008
Ec419	n/a	Derived from cross Ec25 WT x Ec137 imm	GA f	imm	Wild type GA	Macaisne et al., 2017
Ec602	n/a	Derived from cross Ec25 WT x Ec137 imm, inbred 6 generations	GA f	imm	Wild type GA	Ahmed et al., 2014
Ec603	n/a	Derived from cross Ec25 WT x Ec137 imm, inbred 6 generations	GA m	imm	Wild type GA	Ahmed et al., 2014
Ec566	n/a	Derived from cross Ec419 imm x Ec560 oro	SP	oro/ORO IMM/imm	Wild type	Macaisne et al., 2017
NZKU32-22-21	n/a	Wild type strain	GA f	wild type	Wild type	Dieter Müller, unpublished
NZKU1_3	n/a	Wild type strain	GA m	wild type	Wild type	Dieter Müller, unpublished
References
Ahmed, S., Cock, J.M., Pessia, E., Luthringer, R., Cormier, A., Robuchon, M., Sterck, L., Peters, A.F., Dittami, S.M., Corre, E., et al. (2014). A Haploid System of Sex Determination in the Brown Alga Ectocarpus sp. Curr Biol 24, 1945–1957.
Coelho, S.M., Godfroy, O., Arun, A., Le Corguillé, G., Peters, A.F., and Cock, J.M. (2011). OUROBOROS is a master regulator of the gametophyte to sporophyte life cycle transition in the brown alga Ectocarpus. Proc Natl Acad Sci U A 108, 11518–11523.
Heesch, S., Cho, G.Y., Peters, A.F., Le Corguillé, G., Falentin, C., Boutet, G., Coëdel, S., Jubin, C., Samson, G., Corre, E., et al. (2010). A sequence-tagged genetic map for the brown alga Ectocarpus siliculosus provides large-scale assembly of the genome sequence. New Phytol 188, 42–51.
Macaisne, N., Liu, F., Scornet, D., Peters, A.F., Lipinska, A., Perrineau, M.-M., Henry, A., Strittmatter, M., Boo, S.M., and Cock, J.M. (2017). The Ectocarpus IMMEDIATE UPRIGHT gene encodes a member of a novel family of cysteine-rich proteins with an unusual distribution across the eukaryotes. Development 409–418.
Peters, A.F., Scornet, D., Ratin, M., Charrier, B., Monnier, A., Merrien, Y., Corre, E., Coelho, S.M., and Cock, J.M. (2008). Life-cycle-generation-specific developmental processes are modified in the immediate upright mutant of the brown alga Ectocarpus siliculosus. Development 135, 1503–1512.
