# Supplementary material for: Convergent recruitment of TALE homeodomain life cycle regulators to direct sporophyte development in land plants and brown algae
Source: eLife. 2019 Jan 15;8:e43101. doi: 10.7554/eLife.43101 (PMC6368402; doi:10.7554/eLife.43101)
Supplement: Supplementary file 2. [file elife-43101-supp2.xlsx]

## Sheet: Table S2. SCM protoplast expts
Supplementary Table S2. Congo red staining of wild type or sam-1 protoplasts following regeneration in sporophyte-conditioned medium (SCM) or gametophyte-conditioned medium (GCM).
Strain	Genotype	Treatment	Number of individuals tested	Number of individuals stained with congo red	Percent sporophytes
Ec32	SAM	SCM	67	62	0.0746269
Ec494	sam-1	GCM	67	67	0
Ec494	sam-1	SCM	70	70	0
