# Supplementary material for: Convergent recruitment of TALE homeodomain life cycle regulators to direct sporophyte development in land plants and brown algae
Source: eLife. 2019 Jan 15;8:e43101. doi: 10.7554/eLife.43101 (PMC6368402; doi:10.7554/eLife.43101)
Supplement: Supplementary file 3. [file elife-43101-supp3.xlsx]

## Sheet: Table S3. SP GA DE genes
Supplementary Table S3. Analysis of genes that are differentially expressed in the gametophyte and sporophyte generations.
DE, differentially expressed; wtGA, wild type gametophyte, wtSP, wild type sporophyte; SigPep, proteins predicted by Hectar to have a signal peptide or a signal anchor; LocusID, gene identifier
																														Comparison of DE dataset with complete genome (all protein-coding genes):
Upregulated in wild type gametophyte versus wild type sporophyte					Downregulated in wild type gametophyte versus wild type sporophyte										Signal peptide genes that are differentially regulated in wtGA, oro and sam compared with wtSP						All protein-coding genes:				Proteins with signal peptide/anchor:					Upregulated and downregulated GAvSP	Observed			Expected						Upregulated GAvSP	Observed			Expected
LocusID	Function	Manual functional category	Hectar subcellular localisation prediction		LocusID	Function	Manual functional category	Hectar subcellular localisation prediction		The set of genes that is differentially expressed between wild type gametophyte (wtGA) and wild type sporophyte (wtSP) is significantly enriched in genes predicted to encode proteins with signal peptides					99 upregulated signal peptide genes		63 downregulated signal peptide genes			Manual funtional category	All Ec32 protein-coding genes	Upreg GAvSP	Downreg GAvSP	DE GAvSP	All Ec32 protein-coding SigPep genes	Upreg SigPep GAvSP	Downreg SigPep GAvSP	DE SigPep GAvSP		Manual funtional category	all DE genes	not DE	Total	all DE genes	not DE	Total	Chi2 test (>0.05)	Enriched or depleted		Manual funtional category	up DE genes	not DE	Total	up DE genes	not DE	Total	Chi2 test (>0.05)	Enriched or depleted
Ec-08_000850	EF-hand domain pair (400)	Cellular regulation and signalling	chloroplast		Ec-00_008070	von Willebrand factor, type A (905)	Cell wall and extracellular	chloroplast			signal peptide	total	proportion		LocusID	Function	LocusID	Function		Cellular regulation and signalling	1762	102	47	149	176	14	12	26		Cellular regulation and signalling	149	1613	1762	122.952	1639.05	1762	0.0148665	Enriched		Cellular regulation and signalling	102	1660	1762	73.961	1688.04	1762	0.000865395	Enriched
Ec-11_002410	Metallopeptidase, catalytic domain (656)	Proteolysis	chloroplast		Ec-04_002990	hypothetical protein (652)	Unknown	chloroplast		All Ectocarpus gene	2555	17314	0.147568		Ec-00_005750	Hypothetical protein (149)	Ec-00_001900	EsV-1-166 (906)		Transcription	400	6	17	23	8	0	0	0		Transcription	23	377	400	27.912	372.088	400	0.335055			Transcription	6	394	400	16.7902	383.21	400	0.00713697	Depleted
Ec-00_004490	conserved unknown protein (238)	Unknown	mitochondrion		Ec-06_000570	Light harvesting complex protein (222)	Photosynthesis	chloroplast		Upregulated in wtGA, downregulated in wtSP	157	702	0.223647		Ec-00_006570	imm upregulated 4 (253)	Ec-00_004680	Hypothetical protein (59)		Protein binding or modification	631	23	6	29	87	4	2	6		Protein binding or modification	29	602	631	44.0312	586.969	631	0.0188413	Depleted		Protein binding or modification	23	608	631	26.4866	604.513	631	0.488842
Ec-01_009930	Ankyrin repeat-containing domain (724)	Membrane function and transporters	mitochondrion		Ec-06_000580	Light harvesting complex protein (219)	Photosynthesis	chloroplast		Upregulated in wtSP, downregulated in wtGA	124	465	0.266667		Ec-00_009020	expressed unknown protein (161)	Ec-00_007250	Carbohydrate-binding WSC, subgroup (231)		DNA or chromatin modification	600	11	5	16	43	0	2	2		DNA or chromatin modification	16	584	600	41.868	558.132	600	3.39756e-05	Depleted		DNA or chromatin modification	11	589	600	25.1854	574.815	600	0.00387857	Depleted
Ec-02_000090	hypothetical protein (289)	Unknown	mitochondrion		Ec-16_001230	hypothetical protein (604)	Unknown	chloroplast							Ec-00_009390	Pectin lyase fold/virulence factor (1533)	Ec-00_008300	hypothetical protein (434)		RNA modification or binding	412	4	3	7	27	0	0	0		RNA modification or binding	7	405	412	28.7493	383.251	412	2.60264e-05	Depleted		RNA modification or binding	4	408	412	17.2939	394.706	412	0.00109071	Depleted
Ec-05_000220	Hypothetical protein (107)	Unknown	mitochondrion		Ec-17_001220	Hypothetical protein (90)	Unknown	chloroplast							Ec-00_009430	Hypothetical protein (37)	Ec-01_008070	Glycoside-hydrolase family GH114, TIM-barrel domain (373)		Cytoskeleton and flagella	402	19	1	20	24	1	0	1		Cytoskeleton and flagella	20	382	402	28.0515	373.948	402	0.114983			Cytoskeleton and flagella	19	383	402	16.8742	385.126	402	0.597001
Ec-05_000410	Hypothetical protein (114)	Unknown	mitochondrion		Ec-23_000590	expressed unknown protein (222)	Unknown	chloroplast		Fisher test	p-value				Ec-00_009490	Pectin lyase fold (614)	Ec-01_009940	Pathogenesis-related protein, class 1 (320)		Vesicle trafficking and secretion	240	2	0	2	26	1	0	1		Vesicle trafficking and secretion	2	238	240	16.7472	223.253	240	0.000186724	Depleted		Vesicle trafficking and secretion	2	238	240	10.0741	229.926	240	0.00934992	Depleted
Ec-09_004620	TPR repeat-containing protein (1700)	Protein binding or modification	mitochondrion		Ec-26_000850	Protein of unknown function DUF3593 (456)	Unknown	chloroplast		Upregulated in wtGA, downregulated in wtSP	4.143e-06				Ec-01_001290	AAA+ ATPase domain (1202)	Ec-02_000020	Leucine rich repeat receptor kinase (1188)		Membrane function and transporters	1271	55	29	84	275	17	7	24		Membrane function and transporters	84	1187	1271	88.6903	1182.31	1271	0.605587			Membrane function and transporters	55	1216	1271	53.351	1217.65	1271	0.817583
Ec-11_000320	RmlC-like jelly roll fold (730)	Metabolism	mitochondrion		Ec-27_003780	hypothetical protein (225)	Unknown	chloroplast		Upregulated in wtSP, downregulated in wtGA	2.02e-08				Ec-01_002470	expressed unknown protein (397)	Ec-02_002080	hypothetical protein (464)		Protein synthesis	369	0	0	0	30	0	0	0		Protein synthesis	0	369	369	25.7488	343.251	369	1.4311e-07	Depleted		Protein synthesis	0	369	369	15.489	353.511	369	5.7976e-05	Depleted
Ec-12_000310	Formylglycine-dependent sulfatase (726)	Metabolism	mitochondrion		Ec-00_009440	Ribonuclease H-like domain (564)	RNA modification or binding	mitochondrion							Ec-01_002640	expressed unknown protein (276)	Ec-02_002660	expressed unknown protein (699)		Cell cycle	56	0	0	0	6	0	0	0		Cell cycle	0	56	56	3.90768	52.0923	56	0.0404047	Depleted		Cell cycle	0	56	56	2.35063	53.6494	56	0.117254
Ec-12_009050	Hypothetical protein (151)	Unknown	mitochondrion		Ec-01_007760	Superoxide dismutase (231)	Redox	mitochondrion							Ec-01_003820	Glycoside hydrolase superfamily (339)	Ec-05_003230	hypothetical protein (48)		Meiosis	7	0	0	0	0	0	0	0		Meiosis	0	7	7	0.48846	6.51154	7	0.468674			Meiosis	0	7	7	0.293829	6.70617	7	0.57971
Ec-15_002170	RNA methylase	RNA modification or binding	mitochondrion		Ec-01_012130	expressed unknown protein (409)	Unknown	mitochondrion							Ec-02_000470	Catalase-peroxidase haem (515)	Ec-05_005670	expressed unknown protein (357)		Proteolysis	483	9	6	15	93	0	3	3		Proteolysis	15	468	483	33.7037	449.296	483	0.00083663	Depleted		Proteolysis	9	474	483	20.2742	462.726	483	0.0105231	Depleted
Ec-21_000160	hypothetical protein (244)	Unknown	mitochondrion		Ec-02_005210	Hypothetical protein (99)	Unknown	mitochondrion							Ec-02_000530	RGS domain (827)	Ec-05_006600	PC-Esterase (378)		Metabolism	2502	74	59	133	560	17	19	36		Metabolism	133	2369	2502	174.589	2327.41	2502	0.00110052	Depleted		Metabolism	74	2428	2502	105.023	2396.98	2502	0.00198273	Depleted
Ec-24_004480	RGS domain (623)	Cellular regulation and signalling	mitochondrion		Ec-04_001380	Domain of unknown function DUF4440 (218)	Unknown	mitochondrion							Ec-02_002710	expressed unknown protein (160)	Ec-06_003570	conserved unknown protein (409)		Cell wall and extracellular	264	43	31	74	149	30	15	45		Cell wall and extracellular	74	190	264	18.4219	245.578	264	4.26362e-41	Enriched		Cell wall and extracellular	43	221	264	11.0816	252.918	264	1.17024e-22	Enriched
Ec-00_002850	Hypothetical protein (48)	Unknown	no signal peptide or anchor		Ec-04_001400	imm downregulated 3 (218)	Unknown	mitochondrion							Ec-02_002770	Hypothetical protein (185)	Ec-07_000030	Major facilitator superfamily (391)		Photosynthesis	76	2	3	5	5	0	0	0		Photosynthesis	5	71	76	5.30328	70.6967	76	0.891391			Photosynthesis	2	74	76	3.19015	72.8099	76	0.496011
Ec-00_003700	hypothetical protein (54)	Unknown	no signal peptide or anchor		Ec-05_002340	expressed unknown protein (447)	Unknown	mitochondrion							Ec-02_003000	Unsaturated glucuronyl hydrolase, family GH88 (633)	Ec-09_000520	Six-bladed beta-propeller, TolB-like (1099)		Respiration	38	0	0	0	9	0	0	0		Respiration	0	38	38	2.65164	35.3484	38	0.0913427			Respiration	0	38	38	1.59507	36.4049	38	0.196935
Ec-00_004910	hypothetical protein (56)	Unknown	no signal peptide or anchor		Ec-08_005100	expressed unknown protein (363)	Unknown	mitochondrion							Ec-03_002670	YHYH domain (398)	Ec-09_000570	Carbohydrate-binding WSC, subgroup (1007)		Redox	141	5	5	10	46	2	1	3		Redox	10	131	141	9.83897	131.161	141	0.957551			Redox	5	136	141	5.91856	135.081	141	0.699678
Ec-00_005290	Hypothetical protein (51)	Unknown	no signal peptide or anchor		Ec-12_004800	expressed unknown protein (449)	Unknown	mitochondrion							Ec-03_002910	Pectin lyase fold/virulence factor (986)	Ec-09_001190	RGS domain (377)		Stress response	77	0	3	3	19	0	0	0		Stress response	3	74	77	5.37306	71.6269	77	0.28848			Stress response	0	77	77	3.23212	73.7679	77	0.0662434
Ec-00_006360	expressed unknown protein (58)	Unknown	no signal peptide or anchor		Ec-12_008280	Thioredoxin-like fold (176)	Redox	mitochondrion							Ec-03_003720	hypothetical protein (394)	Ec-09_001330	SGNH hydrolase-type esterase domain (441)		Defence	38	1	7	8	4	0	1	1		Defence	8	30	38	2.65164	35.3484	38	0.000660622	Enriched		Defence	1	37	38	1.59507	36.4049	38	0.630244
Ec-00_010080	conserved unknown protein (41)	Unknown	no signal peptide or anchor		Ec-13_003350	hypothetical protein (164)	Unknown	mitochondrion							Ec-03_005100	WD40/YVTN repeat-like-containing domain (2211)	Ec-09_001560	hypothetical protein (389)		Transposon or viral gene	221	12	2	14	30	4	0	4		Transposon or viral gene	14	207	221	15.4214	205.579	221	0.707454			Transposon or viral gene	12	209	221	9.27661	211.723	221	0.360959
Ec-00_010750	Hypothetical protein (48)	Unknown	no signal peptide or anchor		Ec-18_003590	Domain of unknown function DUF4440 (217)	Unknown	mitochondrion							Ec-04_000730	Tyrosinase copper-binding domain (769)	Ec-09_001570	expressed unknown protein (423)		Autophagy	21	0	0	0	1	0	0	0		Autophagy	0	21	21	1.46538	19.5346	21	0.209438			Autophagy	0	21	21	0.881488	20.1185	21	0.337446
Ec-00_010850	hypothetical protein (52)	Unknown	no signal peptide or anchor		Ec-21_000580	expressed unknown protein (511)	Unknown	mitochondrion							Ec-04_004030	Transmembrane protein 107 (141)	Ec-09_002030	FMN-binding split barrel (274)		Unknown	6713	334	241	575	1007	55	62	117		Unknown	575	6138	6713	468.433	6244.57	6713	3.30567e-07	Enriched		Unknown	334	6379	6713	281.782	6431.22	6713	0.00148222	Enriched
Ec-01_009080	conserved unknown protein (43)	Unknown	no signal peptide or anchor		Ec-26_001570	expressed unknown protein (428)	Unknown	mitochondrion							Ec-04_004690	Bromoperoxidase/chloroperoxidase, C-terminal (489)	Ec-09_004390	Hypothetical protein (347)		TOTAL	16724	702	465	1167	2625	145	124	269
Ec-02_002960	hypothetical protein (49)	Unknown	no signal peptide or anchor		Ec-00_005020	Hypothetical protein (35)	Unknown	no signal peptide or anchor							Ec-04_006070	Glycosyltransferase AER61, uncharacterised (740)	Ec-10_002030	hypothetical protein (728)		Percent unknown	0.401399	0.475783	0.51828	0.492716	0.383619	0.37931	0.5	0.434944
Ec-03_001440	Hypothetical protein (44)	Unknown	no signal peptide or anchor		Ec-02_004040	Hypothetical protein (34)	Unknown	no signal peptide or anchor							Ec-05_000010	expressed unknown protein (420)	Ec-10_002050	hypothetical protein (640)
Ec-04_000190	Hypothetical protein (51)	Unknown	no signal peptide or anchor		Ec-04_001460	NB-ARC and TPR repeat-containing protein (53)	Defence	no signal peptide or anchor							Ec-05_000090	Hypothetical protein (71)	Ec-10_002410	Regulator of chromosome condensation 1/beta-lactamase-inhibitor protein II (519)		Esv-1-7 domain genes	91	4	6	10						Esv-1-7 domain genes	10	81	91	6.34998	84.65	91	0.133145			Esv-1-7 domain genes	4	87	91	3.81978	87.1802	91	0.924943
Ec-04_000820	Hypothetical protein (45)	Unknown	no signal peptide or anchor		Ec-06_007150	expressed unknown protein (50)	Unknown	no signal peptide or anchor							Ec-05_000360	expressed unknown protein (322)	Ec-10_003070	Metallo-peptidase family M12B Reprolysin-like (959)
Ec-05_000150	Hypothetical protein (46)	Unknown	no signal peptide or anchor		Ec-07_002570	Hypothetical protein (44)	Unknown	no signal peptide or anchor							Ec-05_000480	P-loop containing nucleoside triphosphate hydrolase (367)	Ec-10_003370	hypothetical protein (1808)
Ec-05_000230	Hypothetical protein (53)	Unknown	no signal peptide or anchor		Ec-11_003500	Hypothetical protein (53)	Unknown	no signal peptide or anchor							Ec-05_000630	Manganese/iron superoxide dismutase, C-terminal (231)	Ec-10_003390	expressed unknown protein (1536)
Ec-05_000370	Hypothetical protein (58)	Unknown	no signal peptide or anchor		Ec-12_000690	Hypothetical protein (55)	Unknown	no signal peptide or anchor							Ec-05_001950	EsV-1-166 (735)	Ec-10_005050	WW domain (502)
Ec-05_000720	Hypothetical protein (53)	Unknown	no signal peptide or anchor		Ec-13_003700	Hypothetical protein (52)	Unknown	no signal peptide or anchor							Ec-05_002280	expressed unknown protein (405)	Ec-11_000400	Mannuronan C-5-epimerase (594)
Ec-06_007940	hypothetical protein (53)	Unknown	no signal peptide or anchor		Ec-16_004760	Hypothetical protein (41)	Unknown	no signal peptide or anchor							Ec-05_003770	Protein kinase-like domain (390)	Ec-12_002760	RGS domain (370)
Ec-07_006330	Hypothetical protein (46)	Unknown	no signal peptide or anchor		Ec-22_001200	Hypothetical protein (59)	Unknown	no signal peptide or anchor							Ec-05_006630	Likely pseudogene (373)	Ec-13_003060	Glucose/Sorbosone dehydrogenase (848)												Comparison of secreted proteins with complete genome (all protein-coding genes):
Ec-08_001440	Hypothetical protein (50)	Unknown	no signal peptide or anchor		Ec-22_001990	Hypothetical protein (49)	Unknown	no signal peptide or anchor							Ec-05_006780	Ammonium transporter (441)	Ec-13_003220	expressed unknown protein (65)												Upreg and downreg GAvSP SigPep	Observed			Expected						Upreg GAvSP SigPep	Observed			Expected
Ec-08_002910	expressed unknown protein (53)	Unknown	no signal peptide or anchor		Ec-06_001150	small heat shock protein	Stress response	other localisation							Ec-06_002480	Xanthine/uracil/vitamin C permease (275)	Ec-13_003230	expressed unknown protein (700)												Manual funtional category	all DE genes	not DE	Total	all DE genes	not DE	Total	Chi2 test (>0.05)	Enriched or depleted		Manual funtional category	up DE genes	not DE	Total	up DE genes	not DE	Total	Chi2 test (>0.05)	Enriched or depleted
Ec-10_003490	Hypothetical protein (51)	Unknown	no signal peptide or anchor		Ec-00_000750	hypothetical protein (118)	Unknown	other localisation							Ec-06_003430	Hypothetical leucine rich repeat protein (686)	Ec-13_003240	expressed unknown protein (202)												Cellular regulation and signalling	26	150	176	18.0358	157.964	176	0.0477621	Enriched		Cellular regulation and signalling	14	162	176	9.7219	166.278	176	0.158066
Ec-11_000090	expressed unknown protein (35)	Unknown	no signal peptide or anchor		Ec-00_001650	hypothetical protein (306)	Unknown	other localisation							Ec-06_009450	Formylglycine-dependent sulfatase (611)	Ec-13_003760	Hypothetical protein (104)												Transcription	0	8	8	0.81981	7.18019	8	0.339211			Transcription	0	8	8	0.441905	7.5581	8	0.494028
Ec-11_006310	imm upregulated 6 (29)	Unknown	no signal peptide or anchor		Ec-00_001700	NIN-like transcription factor (579)	Transcription	other localisation							Ec-06_010450	Peptidyl-prolyl cis-trans isomerase, FKBP-type (144)	Ec-14_005160	Hypothetical protein (334)												Protein binding or modification	6	81	87	8.91543	78.0846	87	0.302708			Protein binding or modification	4	83	87	4.80571	82.1943	87	0.705334
Ec-12_009060	expressed unknown protein (52)	Unknown	no signal peptide or anchor		Ec-00_001860	PR1-like metalloprotease (699)	Defence	other localisation							Ec-07_005990	DOMON domain (1688)	Ec-16_000910	expressed unknown protein (330)												DNA or chromatin modification	2	41	43	4.40648	38.5935	43	0.226249			DNA or chromatin modification	0	43	43	2.37524	40.6248	43	0.112831
Ec-14_004030	Hypothetical protein (55)	Unknown	no signal peptide or anchor		Ec-00_004120	Hypothetical protein (202)	Unknown	other localisation							Ec-08_000100	von Willebrand factor, type D domain (963)	Ec-16_002170	conserved unknown protein (662)												RNA modification or binding	0	27	27	2.76686	24.2331	27	0.0791258			RNA modification or binding	0	27	27	1.49143	25.5086	27	0.208958
Ec-15_000960	Hypothetical protein (56)	Unknown	no signal peptide or anchor		Ec-00_004130	expressed unknown protein (87)	Unknown	other localisation							Ec-08_001050	Hypothetical protein (91)	Ec-16_002240	Exostosin-like (433)												Cytoskeleton and flagella	1	23	24	2.45943	21.5406	24	0.325954			Cytoskeleton and flagella	1	23	24	1.32571	22.6743	24	0.771022
Ec-16_001400	expressed unknown protein (37)	Unknown	no signal peptide or anchor		Ec-00_004160	Nucleotide-diphospho-sugar transferase (241)	Metabolism	other localisation							Ec-08_003140	expressed unknown protein (192)	Ec-16_003230	Hypothetical protein (52)												Vesicle trafficking and secretion	1	25	26	2.66438	23.3356	26	0.281795			Vesicle trafficking and secretion	1	25	26	1.43619	24.5638	26	0.70806
Ec-16_004160	Hypothetical protein (55)	Unknown	no signal peptide or anchor		Ec-00_004210	hypothetical protein (209)	Unknown	other localisation							Ec-08_006060	WSC-domain containing protein (523)	Ec-17_004270	expressed unknown protein (199)												Membrane function and transporters	24	251	275	28.181	246.819	275	0.405786			Membrane function and transporters	17	258	275	15.1905	259.81	275	0.632893
Ec-19_003120	Hypothetical protein (53)	Unknown	no signal peptide or anchor		Ec-00_004510	Glycosyl transferase, family 31 (416)	Metabolism	other localisation							Ec-09_001110	n/a (715)	Ec-19_003540	conserved unknown protein (419)												Protein synthesis	0	30	30	3.07429	26.9257	30	0.0642047			Protein synthesis	0	30	30	1.65714	28.3429	30	0.185371
Ec-20_001670	Hypothetical protein (56)	Unknown	no signal peptide or anchor		Ec-00_004860	Hypothetical protein (115)	Unknown	other localisation							Ec-09_001580	expressed unknown protein (188)	Ec-19_003550	imm downregulated 17 (183)												Cell cycle	0	6	6	0.614857	5.38514	6	0.40785			Cell cycle	0	6	6	0.331429	5.66857	6	0.553657
Ec-20_003440	hypothetical protein (59)	Unknown	no signal peptide or anchor		Ec-00_005250	Hypothetical protein (229)	Unknown	other localisation							Ec-09_002460	Hypothetical leucine rich repeat protein (593)	Ec-20_001150	Hypothetical secreted protein (154)												Meiosis	0	0	0	0	0	0	nd			Meiosis	0	0	0	0	0	0	nd
Ec-20_003610	Hypothetical protein (47)	Unknown	no signal peptide or anchor		Ec-00_005650	expressed unknown protein (130)	Unknown	other localisation							Ec-09_003950	Mannuronan C-5-epimerase (846)	Ec-21_002420	hypothetical protein (842)												Proteolysis	3	90	93	9.53029	83.4697	93	0.02556	Depleted		Proteolysis	0	93	93	5.13714	87.8629	93	0.0197089	Depleted
Ec-22_003170	hypothetical protein (49)	Unknown	no signal peptide or anchor		Ec-00_006960	Ammonium transporter (492)	Membrane function and transporters	other localisation							Ec-09_004400	Hypothetical leucine rich repeat protein (570)	Ec-21_002470	expressed unknown protein (384)												Metabolism	36	524	560	57.3867	502.613	560	0.00288259	Depleted		Metabolism	17	543	560	30.9333	529.067	560	0.0099549	Depleted
Ec-23_003150	expressed unknown protein (54)	Unknown	no signal peptide or anchor		Ec-00_007370	expressed unknown protein (656)	Unknown	other localisation							Ec-10_006420	hypothetical protein (426)	Ec-21_003670	Solute carrier family 35 member SLC35F1/F2/F6 (377)												Cell wall and extracellular	45	104	149	15.269	133.731	149	9.64924e-16	Enriched		Cell wall and extracellular	30	119	149	8.23048	140.77	149	5.86398e-15	Enriched
Ec-26_000040	Hypothetical protein (56)	Unknown	no signal peptide or anchor		Ec-00_008380	Glutathione S-transferase (223)	Redox	other localisation							Ec-11_001000	expressed unknown protein (442)	Ec-22_000910	expressed unknown protein (571)												Photosynthesis	0	5	5	0.512381	4.48762	5	0.449908			Photosynthesis	0	5	5	0.27619	4.72381	5	0.588726
Ec-26_000590	Hypothetical protein (55)	Unknown	no signal peptide or anchor		Ec-00_008840	WSC domain containing protein (294)	Cell wall and extracellular	other localisation							Ec-11_001390	Hypothetical leucine rich repeat protein (517)	Ec-22_001980	Alpha/Beta hydrolase fold (450)												Respiration	0	9	9	0.922286	8.07771	9	0.310726			Respiration	0	9	9	0.497143	8.50286	9	0.468205
Ec-26_003800	Hypothetical protein (57)	Unknown	no signal peptide or anchor		Ec-00_009050	expressed unknown protein (434)	Unknown	other localisation							Ec-11_002830	conserved unknown protein (487)	Ec-22_002000	rRNA intron-encoded homing endonuclease (152)												Redox	3	43	46	4.7139	41.2861	46	0.404706			Redox	2	44	46	2.54095	43.459	46	0.726984
Ec-19_004160	Nitrate high affinity transporter; pseudogene	Membrane function and transporters	other localisation		Ec-00_009600	expressed unknown protein (585)	Unknown	other localisation							Ec-11_003810	Aminotransferase (490)	Ec-23_004220	Zinc/iron permease (505)												Stress response	0	19	19	1.94705	17.053	19	0.140785			Stress response	0	19	19	1.04952	17.9505	19	0.291889
Ec-00_000150	Ankyrin repeat-containing domain (274)	Membrane function and transporters	other localisation		Ec-00_010180	hypothetical protein (751)	Unknown	other localisation							Ec-11_004650	coagulation factor 5/8 type domain protein (529)	Ec-24_001130	Mannuronan C-5-epimerase N-terminal fragment (285)												Defence	1	3	4	0.409905	3.5901	4	0.330615			Defence	0	4	4	0.220952	3.77905	4	0.628668
Ec-00_001340	Ankyrin repeat (392)	Membrane function and transporters	other localisation		Ec-00_010510	Fungal lipase-like domain (388)	Metabolism	other localisation							Ec-11_005180	Mannuronan C-5-epimerase internal fragment (975)	Ec-24_002450	hypothetical protein (1220)												Transposon or viral gene	4	26	30	3.07429	26.9257	30	0.577329			Transposon or viral gene	4	26	30	1.65714	28.3429	30	0.0611477
Ec-00_001540	hypothetical protein (773)	Unknown	other localisation		Ec-00_010550	Hypothetical protein (151)	Unknown	other localisation							Ec-12_001990	Chitobiase/beta-hexosaminidase C-terminal domain (600)	Ec-24_003880	von Willebrand factor, type A (1239)												Autophagy	0	1	1	0.102476	0.897524	1	0.735438			Autophagy	0	1	1	0.0552381	0.944762	1	0.808934
Ec-00_002280	hypothetical protein (435)	Unknown	other localisation		Ec-00_011300	expressed unknown protein (408)	Unknown	other localisation							Ec-12_002830	expressed unknown protein (538)	Ec-25_000360	expressed unknown protein (637)												Unknown	117	890	1007	103.194	903.806	1007	0.151398			Unknown	55	952	1007	55.6248	951.375	1007	0.931321
Ec-00_002620	expressed unknown protein (63)	Unknown	other localisation		Ec-00_011430	Heat shock factor (HSF)-type, DNA-binding (283)	Transcription	other localisation							Ec-12_003820	expressed unknown protein (272)	Ec-25_001570	Pectin lyase fold/virulence factor (1902)
Ec-00_003690	expressed unknown protein (270)	Unknown	other localisation		Ec-00_011470	Nucleotide cyclase (952)	Metabolism	other localisation							Ec-12_009020	hypothetical protein (147)	Ec-25_003420	Glycosyltransferase AER61, uncharacterised (670)
Ec-00_003720	DNA helicase Pif1-like (1819)	DNA or chromatin modification	other localisation		Ec-01_002500	LRR-GTPase of the ROCO family (1115)	Cellular regulation and signalling	other localisation							Ec-13_000770	hypothetical protein (165)	Ec-26_000310	Catalase; alternative name: imm downregulated 7 (IDW7)
Ec-00_003730	expressed unknown protein (319)	Unknown	other localisation		Ec-01_003440	hypothetical protein (437)	Unknown	other localisation							Ec-13_000790	hypothetical protein (328)	Ec-26_001560	Nucleotide-diphospho-sugar transferase (321)
Ec-00_003740	Harbinger transposase-derived protein (292)	Transposon or viral gene	other localisation		Ec-01_005180	Tetratricopeptide-like helical domain (1288)	Protein binding or modification	other localisation							Ec-13_001680	Phosphate transporter (512)	Ec-26_001580	P-loop containing nucleoside triphosphate hydrolase (401)
Ec-00_004460	PiggyBac transposable element-derived protein (93)	Transposon or viral gene	other localisation		Ec-01_007200	AAA+ ATPase domain (646)	Membrane function and transporters	other localisation							Ec-13_003170	Soluble quinoprotein glucose/sorbosone dehydrogenase (935)	Ec-26_001600	hypothetical protein (249)
Ec-00_004470	Hypothetical protein (170)	Unknown	other localisation		Ec-01_007230	AAA+ ATPase domain (853)	Membrane function and transporters	other localisation							Ec-13_004130	YHYH domain (499)	Ec-26_001650	ABC transporter-like (1429)
Ec-00_004500	hypothetical protein (774)	Unknown	other localisation		Ec-01_008030	Glutathione S-transferase, C-terminal-like (375)	Redox	other localisation							Ec-16_001580	Hypothetical protein (40)
Ec-00_004920	PIN domain-like (550)	RNA modification or binding	other localisation		Ec-01_009960	Pathogenesis-related protein, class 1 (580)	Defence	other localisation							Ec-16_001600	Mpv17/PMP22 (136)
Ec-00_004940	hypothetical protein (92)	Unknown	other localisation		Ec-02_000190	expressed unknown protein (515)	Unknown	other localisation							Ec-17_002940	Phosphate transporter (474)
Ec-00_004950	expressed unknown protein (155)	Unknown	other localisation		Ec-02_000900	expressed unknown protein (224)	Unknown	other localisation							Ec-17_004390	Sodium/solute symporter (422)
Ec-00_004960	Hypothetical protein (168)	Unknown	other localisation		Ec-02_002050	Ubiquitin-like (454)	Proteolysis	other localisation							Ec-17_004400	Solute:Sodium symporter family (161)
Ec-00_005180	Zinc finger, RING/FYVE/PHD-type (806)	Cellular regulation and signalling	other localisation		Ec-02_002810	Hypothetical protein (159)	Unknown	other localisation							Ec-18_000100	Major Facilitator Superfamily (526)
Ec-00_005310	Hypothetical protein (483)	Unknown	other localisation		Ec-02_003580	WD40-repeat-containing domain (555)	Protein binding or modification	other localisation							Ec-18_001140	Immunoglobulin E-set (542)
Ec-00_005390	Notch domain (421)	Cellular regulation and signalling	other localisation		Ec-02_003940	Kinesin motor domain (1263)	Cytoskeleton and flagella	other localisation							Ec-19_000090	expressed unknown protein (376)
Ec-00_005620	hypothetical protein (870)	Unknown	other localisation		Ec-02_004590	expressed unknown protein (282)	Unknown	other localisation							Ec-19_000260	hypothetical protein (262)
Ec-00_005630	RGS domain (493)	Cellular regulation and signalling	other localisation		Ec-03_000740	imm upregulated 13 (65)	Unknown	other localisation							Ec-19_002200	hypothetical protein (166)
Ec-00_005680	Pectin lyase fold protein (1202)	Transposon or viral gene	other localisation		Ec-03_000940	expressed unknown protein (821)	Unknown	other localisation							Ec-19_004010	Riboflavin synthase-like beta-barrel (492)
Ec-00_005690	Ankyrin repeat protein (212)	Transposon or viral gene	other localisation		Ec-03_002020	Spherulation-specific family 4 (334)	Unknown	other localisation							Ec-19_004380	Notch domain (551)
Ec-00_005960	conserved unknown protein (778)	Unknown	other localisation		Ec-03_003880	Hypothetical protein (110)	Unknown	other localisation							Ec-19_005210	NAD(P)-binding domain (308)
Ec-00_006060	expressed unknown protein (986)	Unknown	other localisation		Ec-03_003890	P-loop containing nucleoside triphosphate hydrolase (697)	Metabolism	other localisation							Ec-20_002850	hypothetical protein (230)
Ec-00_007110	hypothetical protein (619)	Unknown	other localisation		Ec-03_004150	expressed unknown protein (383)	Unknown	other localisation							Ec-20_003100	Pectin lyase fold (695)
Ec-00_007130	DNA helicase Pif1-like (1860)	DNA or chromatin modification	other localisation		Ec-03_004350	Zn(2)-C6 fungal-type DNA-binding domain (1090)	Transcription	other localisation							Ec-20_003180	RGS domain (458)
Ec-00_007300	Peptidase M14, carboxypeptidase A (453)	Proteolysis	other localisation		Ec-03_004570	Notch domain (320)	Cellular regulation and signalling	other localisation							Ec-21_001320	Galactose-binding domain-like (1155)
Ec-00_007600	conserved unknown protein (970)	Unknown	other localisation		Ec-03_004620	Zn(2)-C6 fungal-type DNA-binding domain (893)	Transcription	other localisation							Ec-21_001360	Pectin lyase fold (1150)
Ec-00_007630	Notch domain (688)	Cellular regulation and signalling	other localisation		Ec-03_004650	UAA transporter (287)	Membrane function and transporters	other localisation							Ec-21_002190	Hypothetical protein (208)
Ec-00_007650	hypothetical protein (419)	Unknown	other localisation		Ec-03_005240	FNIP (680)	Unknown	other localisation							Ec-21_003160	polymorphic Outer membrane protein G/I family (1435)
Ec-00_008170	Hypothetical protein (89)	Unknown	other localisation		Ec-04_001370	imm downregulated 2 (267)	Unknown	other localisation							Ec-22_002180	Leucine-rich repeat (335)
Ec-00_008280	Tyrosinase copper-binding domain (543)	Metabolism	other localisation		Ec-04_001390	imm downregulated 1 (217)	Unknown	other localisation							Ec-22_002240	hypothetical protein (292)
Ec-00_008660	Hypothetical protein (234)	Unknown	other localisation		Ec-04_001470	pleiotropic drug resistance transporter (1440)	Membrane function and transporters	other localisation							Ec-23_003290	hypothetical protein (154)
Ec-00_008720	conserved unknown protein (742)	Unknown	other localisation		Ec-05_000960	expressed unknown protein (256)	Unknown	other localisation							Ec-23_003300	Hypothetical protein (67)
Ec-00_008800	expressed unknown protein (238)	Unknown	other localisation		Ec-05_001360	conserved unknown protein (661)	Unknown	other localisation							Ec-24_000110	Zinc carboxypeptidase family protein (766)
Ec-00_008870	Glutathione S-transferase (174)	Redox	other localisation		Ec-05_004340	Methyltransferase type 11 (407)	Metabolism	other localisation							Ec-24_003300	Patched (964)
Ec-00_008920	hypothetical protein (1684)	Unknown	other localisation		Ec-05_004480	conserved unknown protein (749)	Unknown	other localisation							Ec-24_003970	Choline transporter-like (363)
Ec-00_009250	hypothetical protein (323)	Unknown	other localisation		Ec-05_005160	expressed unknown protein (128)	Unknown	other localisation							Ec-24_003990	Choline transporter-like (438)
Ec-00_009310	Domain of unknown function DUF4033 (221)	Unknown	other localisation		Ec-05_005200	expressed unknown protein (97)	Unknown	other localisation							Ec-24_004240	EsV-1-166 (467)
Ec-00_009410	Ferric reductase transmembrane component-like domain (815)	Membrane function and transporters	other localisation		Ec-05_005650	hypothetical protein (185)	Unknown	other localisation							Ec-25_003490	Carbohydrate-binding WSC, subgroup (626)
Ec-00_009480	hypothetical protein (111)	Unknown	other localisation		Ec-05_006330	NADH:flavin oxidoreductase/NADH oxidase, N-terminal (314)	Metabolism	other localisation							Ec-26_000060	n/a (1024)
Ec-00_009810	expressed unknown protein (408)	Unknown	other localisation		Ec-05_006610	PC-Esterase (402)	Metabolism	other localisation							Ec-26_005260	EsV-1-163 (396)
Ec-00_009980	hypothetical protein (299)	Unknown	other localisation		Ec-06_000020	NB-ARC and TPR repeat-containig protein (1252)	Defence	other localisation							Ec-26_006670	imm upregulated 9 (439)
Ec-00_010070	hypothetical protein (536)	Unknown	other localisation		Ec-06_000600	Light harvesting complex protein (71)	Photosynthesis	other localisation							Ec-27_002330	imm upregulated 5 (760)
Ec-00_010620	hypothetical protein (213)	Unknown	other localisation		Ec-06_001020	hypothetical protein (169)	Unknown	other localisation							Ec-27_006700	Mannuronan C-5-epimerase (493)
Ec-01_000390	Armadillo-type fold (1446)	Cellular regulation and signalling	other localisation		Ec-06_001760	Phosphoglycerate mutase (267)	Metabolism	other localisation							Ec-28_003100	RGS domain (440)
Ec-01_000840	Mg2+ transporter protein, CorA-like/Zinc transport protein ZntB (519)	Membrane function and transporters	other localisation		Ec-06_002080	Flavin monooxygenase FMO (500)	Metabolism	other localisation
Ec-01_001300	Peptidase C19, ubiquitin carboxyl-terminal hydrolase (1135)	Proteolysis	other localisation		Ec-06_002250	Taurine catabolism dioxygenase TauD/TfdA (245)	Metabolism	other localisation
Ec-01_001800	LRR-GTPase of the ROCO family, putative pseudogene (1317)	Cellular regulation and signalling	other localisation		Ec-06_002700	Armadillo-type fold (916)	Cellular regulation and signalling	other localisation
Ec-01_002200	Apoptosis inducing factor (377)	Cellular regulation and signalling	other localisation		Ec-06_002710	Hypothetical leucine rich repeat and MORN motif protein (846)	Cellular regulation and signalling	other localisation
Ec-01_002210	conserved unknown protein (223)	Unknown	other localisation		Ec-06_004930	hypothetical protein (309)	Unknown	other localisation
Ec-01_002940	RGS domain (689)	Cellular regulation and signalling	other localisation		Ec-06_006630	EsV-1-210/211 paralog (330)	Transposon or viral gene	other localisation
Ec-01_003160	Rubisco LSMT, substrate-binding domain (718)	Photosynthesis	other localisation		Ec-06_006970	Major facilitator superfamily domain (249)	Membrane function and transporters	other localisation
Ec-01_004090	hypothetical protein (921)	Unknown	other localisation		Ec-06_006980	conserved unknown protein (78)	Unknown	other localisation
Ec-01_004130	hypothetical protein (606)	Unknown	other localisation		Ec-06_007160	Protein of unknown function DUF583 (211)	Unknown	other localisation
Ec-01_004140	hypothetical protein (472)	Unknown	other localisation		Ec-06_007280	Major facilitator superfamily domain (464)	Membrane function and transporters	other localisation
Ec-01_004380	ABC membrane transporter (1338)	Membrane function and transporters	other localisation		Ec-06_007290	Major facilitator superfamily (570)	Membrane function and transporters	other localisation
Ec-01_005210	hypothetical protein (522)	Unknown	other localisation		Ec-06_007360	Major Facilitator Superfamily (MFS) protein domains (444)	Membrane function and transporters	other localisation
Ec-01_005400	hypothetical protein (1247)	Unknown	other localisation		Ec-06_009940	expressed unknown protein (302)	Unknown	other localisation
Ec-01_006190	flagellar associated protein (695)	Cytoskeleton and flagella	other localisation		Ec-07_000900	Mannuronan C-5-epimerase C-terminal fragment (363)	Cell wall and extracellular	other localisation
Ec-01_007390	flagellar associated protein (3446)	Cytoskeleton and flagella	other localisation		Ec-07_001980	Carbohydrate-binding WSC (776)	Cell wall and extracellular	other localisation
Ec-01_007440	EF-hand domain pair (125)	Cellular regulation and signalling	other localisation		Ec-07_002580	Heat shock protein 70 - putative (612)	Stress response	other localisation
Ec-01_007640	conserved unknown protein (871)	Unknown	other localisation		Ec-07_002680	Hypothetical protein (128)	Unknown	other localisation
Ec-01_008310	Dbl homology (DH) domain (1463)	Cellular regulation and signalling	other localisation		Ec-07_002710	hypothetical protein (119)	Unknown	other localisation
Ec-01_008320	Hypothetical protein (64)	Unknown	other localisation		Ec-07_003540	Zinc finger, RING/FYVE/PHD-type (364)	Cellular regulation and signalling	other localisation
Ec-01_008590	Protein kinase domain (523)	Cellular regulation and signalling	other localisation		Ec-07_004620	expressed unknown protein (76)	Unknown	other localisation
Ec-01_009300	Hypothetical protein (73)	Unknown	other localisation		Ec-07_005370	hypothetical protein (230)	Unknown	other localisation
Ec-01_009650	Armadillo-like helical (2343)	Cellular regulation and signalling	other localisation		Ec-07_006990	expressed unknown protein (359)	Unknown	other localisation
Ec-01_009870	ARL3, ARF-like Ras superfamily GTPase (189)	Cellular regulation and signalling	other localisation		Ec-07_007450	conserved unknown protein (641)	Unknown	other localisation
Ec-01_010390	Tetratricopeptide-like helical domain (782)	Protein binding or modification	other localisation		Ec-08_000120	hypothetical protein (925)	Unknown	other localisation
Ec-01_010720	Globin, annelid-type (162)	Metabolism	other localisation		Ec-08_000140	hypothetical protein (437)	Unknown	other localisation
Ec-01_011010	Tetratricopeptide-like helical domain (536)	Protein binding or modification	other localisation		Ec-08_000570	expressed unknown protein (568)	Unknown	other localisation
Ec-01_011560	conserved unknown protein (237)	Unknown	other localisation		Ec-08_001200	NB-ARC and TPR repeat-containing protein - likely pseudogene (745)	Defence	other localisation
Ec-01_012000	Hypothetical protein (90)	Unknown	other localisation		Ec-08_001340	EsV-1-7 domain protein (731)	Cellular regulation and signalling	other localisation
Ec-02_000050	conserved unknown protein (1358)	Unknown	other localisation		Ec-08_001500	hypothetical protein (257)	Unknown	other localisation
Ec-02_000070	Domain of unknown function DUF4483 (217)	Unknown	other localisation		Ec-08_003560	Polyketide synthase, enoylreductase domain (366)	Metabolism	other localisation
Ec-02_000230	hypothetical protein (710)	Unknown	other localisation		Ec-08_003620	hypothetical protein (410)	Unknown	other localisation
Ec-02_001350	Zinc finger, RING/FYVE/PHD-type (588)	Cellular regulation and signalling	other localisation		Ec-08_005010	Transient Receptor Potential Channel (972)	Membrane function and transporters	other localisation
Ec-02_001770	Dynein heavy chain (1966)	Cytoskeleton and flagella	other localisation		Ec-08_005550	expressed unknown protein (235)	Unknown	other localisation
Ec-02_002000	Tetratricopeptide-like helical domain (528)	Protein binding or modification	other localisation		Ec-08_005560	expressed unknown protein (249)	Unknown	other localisation
Ec-02_002600	expressed unknown protein (687)	Unknown	other localisation		Ec-08_005920	Glycosyltransferase, family GT47 (588)	Metabolism	other localisation
Ec-02_002640	hypothetical protein (544)	Unknown	other localisation		Ec-08_006190	Cyclic nucleotide-binding domain (1111)	Cellular regulation and signalling	other localisation
Ec-02_002900	Peptidase C19, ubiquitin-specific peptidase, DUSP domain (506)	Proteolysis	other localisation		Ec-08_006280	Hypothetical protein (225)	Unknown	other localisation
Ec-02_002920	Peptidase C19, ubiquitin-specific peptidase, DUSP domain (300)	Proteolysis	other localisation		Ec-08_006450	hypothetical protein (157)	Unknown	other localisation
Ec-02_002970	Unsaturated glucuronyl hydrolase, family GH88 (596)	Metabolism	other localisation		Ec-08_006510	hypothetical protein (403)	Unknown	other localisation
Ec-02_003270	AAA+ ATPase domain (1230)	Membrane function and transporters	other localisation		Ec-08_006590	expressed unknown protein (273)	Unknown	other localisation
Ec-02_003480	Hypothetical protein (79)	Unknown	other localisation		Ec-09_000420	SGNH hydrolase-type esterase domain (445)	Metabolism	other localisation
Ec-02_004470	hypothetical protein (178)	Unknown	other localisation		Ec-09_000700	Hypothetical protein (417)	Unknown	other localisation
Ec-02_004480	conserved unknown protein (629)	Unknown	other localisation		Ec-09_000940	Glycosyltransferase AER61, uncharacterised (437)	Metabolism	other localisation
Ec-02_004690	WSC domain protein (1300)	Cell wall and extracellular	other localisation		Ec-09_002040	hypothetical protein (107)	Unknown	other localisation
Ec-02_004910	Adenylyl cyclase class-3/4/guanylyl cyclase (1672)	Cellular regulation and signalling	other localisation		Ec-09_002310	hypothetical protein (1748)	Unknown	other localisation
Ec-02_005240	hypothetical protein (473)	Unknown	other localisation		Ec-09_004250	expressed unknown protein (288)	Unknown	other localisation
Ec-02_005980	RNA-binding region-containing protein (RNP-1) (1855)	RNA modification or binding	other localisation		Ec-09_004260	Pectin lyase fold (1052)	Cell wall and extracellular	other localisation
Ec-02_006410	hypothetical protein (784)	Unknown	other localisation		Ec-09_004470	hypothetical protein (1282)	Unknown	other localisation
Ec-03_000370	P-loop containing nucleoside triphosphate hydrolase (281)	Metabolism	other localisation		Ec-10_000310	expressed unknown protein (190)	Unknown	other localisation
Ec-03_001110	SANT/Myb/Homeodomain-like protein (1484)	Transcription	other localisation		Ec-10_000810	LRR-GTPase of the ROCO family, putative pseudogene (929)	Cellular regulation and signalling	other localisation
Ec-03_001260	hypothetical protein (154)	Unknown	other localisation		Ec-10_001580	expressed unknown protein (65)	Unknown	other localisation
Ec-03_001500	GREB1 and High mobility group domain protein (2166)	DNA or chromatin modification	other localisation		Ec-10_001860	hypothetical protein (168)	Unknown	other localisation
Ec-03_001630	Anoctamin (1712)	Membrane function and transporters	other localisation		Ec-10_002100	conserved unknown protein (85)	Unknown	other localisation
Ec-03_002230	EF-hand domain pair (746)	Cellular regulation and signalling	other localisation		Ec-10_003690	Serine/threonine/dual specificity protein kinase, catalytic domain (1225)	Cellular regulation and signalling	other localisation
Ec-03_002470	hypothetical protein (353)	Unknown	other localisation		Ec-10_003830	expressed unknown protein (310)	Unknown	other localisation
Ec-03_002500	Patched (901)	Cellular regulation and signalling	other localisation		Ec-10_004480	UDP-N-acetylglucosamine--peptide N-acetylglucosaminyltransferase, family GT41 (1164)	Metabolism	other localisation
Ec-03_002510	hypothetical protein (319)	Unknown	other localisation		Ec-10_004600	Ankyrin Repeat Transient Receptor Potential Channel (1759)	Membrane function and transporters	other localisation
Ec-03_003040	Protein of unknown function DUF1042 (1354)	Unknown	other localisation		Ec-10_004720	Hypothetical protein (229)	Unknown	other localisation
Ec-03_003070	Uncharacterised domain, di-copper centre (347)	Unknown	other localisation		Ec-10_005060	Hypothetical protein (92)	Unknown	other localisation
Ec-03_003130	Uncharacterised domain, di-copper centre (681)	Unknown	other localisation		Ec-10_005090	expressed unknown protein (95)	Unknown	other localisation
Ec-03_003440	Dynein heavy chain (4144)	Cytoskeleton and flagella	other localisation		Ec-10_005770	expressed unknown protein (122)	Unknown	other localisation
Ec-03_003540	Carbohydrate binding family 6 (667)	Cell wall and extracellular	other localisation		Ec-11_000640	EsV-1-166 (413)	Cell wall and extracellular	other localisation
Ec-03_004340	Mg2+ transporter protein, CorA-like/Zinc transport protein ZntB (795)	Membrane function and transporters	other localisation		Ec-11_000810	Nucleotide-diphospho-sugar transferase (427)	Metabolism	other localisation
Ec-03_004970	hypothetical protein (1824)	Unknown	other localisation		Ec-11_003460	Hypothetical protein (64)	Unknown	other localisation
Ec-03_005020	Serine/threonine-protein kinase and HECT domain protein (2493)	Cellular regulation and signalling	other localisation		Ec-11_003490	conserved unknown protein (207)	Unknown	other localisation
Ec-03_005050	PKD/REJ-like protein (1384)	Cellular regulation and signalling	other localisation		Ec-11_005960	EsV-1-7 domain protein (218)	Cellular regulation and signalling	other localisation
Ec-04_000850	Hypothetical protein (67)	Unknown	other localisation		Ec-12_000480	Conserved hypothetical protein CHP02231 (647)	Unknown	other localisation
Ec-04_000930	Myosin head, motor domain (1225)	Cytoskeleton and flagella	other localisation		Ec-12_000490	Conserved hypothetical protein CHP02231 (636)	Unknown	other localisation
Ec-04_001060	Periplasmic binding protein-like I (900)	Cell wall and extracellular	other localisation		Ec-12_001150	Homeodomain-like (185)	Transcription	other localisation
Ec-04_002470	MULE transposase domain (592)	Transposon or viral gene	other localisation		Ec-12_001810	Nucleotide-binding alpha-beta plait domain (493)	Metabolism	other localisation
Ec-04_002920	Hypothetical protein (99)	Unknown	other localisation		Ec-12_001820	Hypothetical protein (93)	Unknown	other localisation
Ec-04_003650	expressed unknown protein (189)	Unknown	other localisation		Ec-12_002690	RGS domain (633)	Cellular regulation and signalling	other localisation
Ec-04_003660	Hypothetical protein (142)	Unknown	other localisation		Ec-12_002710	RGS domain (509)	Cellular regulation and signalling	other localisation
Ec-04_006080	conserved unknown protein (635)	Unknown	other localisation		Ec-12_002810	conserved unknown protein (1410)	Unknown	other localisation
Ec-05_000030	Hypothetical protein (64)	Unknown	other localisation		Ec-12_003000	hypothetical protein (598)	Unknown	other localisation
Ec-05_000050	hypothetical protein (1037)	Unknown	other localisation		Ec-12_003970	Protein kinase-like domain (1860)	Cellular regulation and signalling	other localisation
Ec-05_000080	hypothetical protein (278)	Unknown	other localisation		Ec-12_004460	Poly(ADP-ribose) polymerase, catalytic domain (288)	DNA or chromatin modification	other localisation
Ec-05_000200	hypothetical protein (209)	Unknown	other localisation		Ec-12_004810	Zn(2)-C6 fungal-type DNA-binding domain (326)	Transcription	other localisation
Ec-05_000310	expressed unknown protein (72)	Unknown	other localisation		Ec-12_005340	hypothetical protein (3039)	Unknown	other localisation
Ec-05_000330	Hypothetical protein (69)	Unknown	other localisation		Ec-12_007040	hypothetical protein (336)	Unknown	other localisation
Ec-05_000340	expressed unknown protein (733)	Unknown	other localisation		Ec-12_007690	6-phosphogluconate dehydrogenase, C-terminal-like (497)	Metabolism	other localisation
Ec-05_000350	Hypothetical protein (68)	Unknown	other localisation		Ec-12_008990	conserved unknown protein (163)	Unknown	other localisation
Ec-05_000380	Hypothetical protein (65)	Unknown	other localisation		Ec-12_009130	hypothetical protein (249)	Unknown	other localisation
Ec-05_000400	Nucleotide-diphospho-sugar transferase (159)	Metabolism	other localisation		Ec-13_000120	expressed unknown protein (103)	Unknown	other localisation
Ec-05_000420	Hypothetical protein (266)	Unknown	other localisation		Ec-13_000130	Hypothetical protein (804)	Unknown	other localisation
Ec-05_000450	Tetratricopeptide TPR_2 repeat protein (595)	Protein binding or modification	other localisation		Ec-13_000140	expressed unknown protein (400)	Unknown	other localisation
Ec-05_000460	Hypothetical protein (131)	Unknown	other localisation		Ec-13_000270	expressed unknown protein (237)	Unknown	other localisation
Ec-05_000470	hypothetical protein (163)	Unknown	other localisation		Ec-13_000610	Hypothetical leucine rich repeat protein (248)	Cellular regulation and signalling	other localisation
Ec-05_000570	expressed unknown protein (153)	Unknown	other localisation		Ec-13_000800	hypothetical protein (167)	Unknown	other localisation
Ec-05_000580	Hypothetical protein (63)	Unknown	other localisation		Ec-13_000810	expressed unknown protein (191)	Unknown	other localisation
Ec-05_000590	Sulfotransferase (235)	Metabolism	other localisation		Ec-13_001090	EsV-1-7 domain protein (556)	Cellular regulation and signalling	other localisation
Ec-05_000640	dynein heavy chain (4500)	Cytoskeleton and flagella	other localisation		Ec-13_001100	EsV-1-7 domain protein (448)	Cellular regulation and signalling	other localisation
Ec-05_000700	hypothetical protein (234)	Unknown	other localisation		Ec-13_001450	expressed unknown protein (286)	Unknown	other localisation
Ec-05_000710	hypothetical protein (302)	Unknown	other localisation		Ec-13_001560	expressed unknown protein (557)	Unknown	other localisation
Ec-05_000730	PC-Esterase (323)	Metabolism	other localisation		Ec-13_003040	expressed unknown protein (150)	Unknown	other localisation
Ec-05_000750	expressed unknown protein (181)	Unknown	other localisation		Ec-13_003250	expressed unknown protein (102)	Unknown	other localisation
Ec-05_000770	P-loop containing nucleoside triphosphate hydrolase (162)	Metabolism	other localisation		Ec-13_003370	expressed unknown protein (166)	Unknown	other localisation
Ec-05_000860	RGS domain (177)	Cellular regulation and signalling	other localisation		Ec-13_003430	hypothetical protein (290)	Unknown	other localisation
Ec-05_002410	Mpv17/PMP22 peroxisomal membrane protein (320)	Membrane function and transporters	other localisation		Ec-13_003670	hypothetical protein (194)	Unknown	other localisation
Ec-05_002810	Peptidase C2, calpain, catalytic domain (1942)	Proteolysis	other localisation		Ec-13_003680	expressed unknown protein (194)	Unknown	other localisation
Ec-05_002960	Ankyrin repeat-containing domain (1865)	Membrane function and transporters	other localisation		Ec-13_003710	Hypothetical protein (67)	Unknown	other localisation
Ec-05_003460	Cyclic nucleotide-binding-like (842)	Cellular regulation and signalling	other localisation		Ec-13_003720	expressed unknown protein (467)	Unknown	other localisation
Ec-05_003570	Leucine rich repeat 4 (294)	Cellular regulation and signalling	other localisation		Ec-13_003730	hypothetical protein (124)	Unknown	other localisation
Ec-05_003810	serine/threonine protein kinase (484)	Cellular regulation and signalling	other localisation		Ec-13_003740	expressed unknown protein (180)	Unknown	other localisation
Ec-05_005110	Hypothetical protein (78)	Unknown	other localisation		Ec-13_003750	expressed unknown protein (141)	Unknown	other localisation
Ec-05_005810	Agenet-like domain (994)	Cellular regulation and signalling	other localisation		Ec-13_004150	hypothetical protein (354)	Unknown	other localisation
Ec-05_006250	hypothetical protein (178)	Unknown	other localisation		Ec-13_004400	Zn(2)-C6 fungal-type DNA-binding domain (707)	Transcription	other localisation
Ec-05_006270	Axin interactor dorsalization-associated protein, C-terminal domain (1990)	Cytoskeleton and flagella	other localisation		Ec-13_004480	Putative Leucine Rich Repeat Protein (457)	Cellular regulation and signalling	other localisation
Ec-05_006790	hypothetical protein (263)	Unknown	other localisation		Ec-13_004730	expressed unknown protein (328)	Unknown	other localisation
Ec-06_000030	similar to TAK1 (TGF-beta-activated kinase) (298)	Cellular regulation and signalling	other localisation		Ec-14_001790	Protein kinase domain (376)	Cellular regulation and signalling	other localisation
Ec-06_000180	conserved unknown protein (295)	Unknown	other localisation		Ec-14_002490	Homeodomain-like (304)	Transcription	other localisation
Ec-06_001080	Heat Shock transcription factor (629)	Transcription	other localisation		Ec-14_002680	hypothetical protein (326)	Unknown	other localisation
Ec-06_001240	P-loop containing nucleoside triphosphate hydrolase (198)	Metabolism	other localisation		Ec-14_002760	expressed unknown protein (199)	Unknown	other localisation
Ec-06_001290	ADC synthase (1165)	Metabolism	other localisation		Ec-14_003740	Heat shock factor (HSF)-type, DNA-binding (344)	Transcription	other localisation
Ec-06_001440	Immunoglobulin E-set (391)	Protein binding or modification	other localisation		Ec-14_003780	Heat shock factor (HSF)-type, DNA-binding (191)	Transcription	other localisation
Ec-06_001620	Hypothetical protein (144)	Unknown	other localisation		Ec-14_004060	Zn(2)-C6 fungal-type DNA-binding domain (815)	Transcription	other localisation
Ec-06_002360	expressed unknown protein (262)	Unknown	other localisation		Ec-14_005260	NIN-like transcription factor (490)	Transcription	other localisation
Ec-06_002490	Xanthine/uracil/vitamin C permease (213)	Membrane function and transporters	other localisation		Ec-14_006560	PAS domain (168)	Cellular regulation and signalling	other localisation
Ec-06_003310	Alpha/Beta hydrolase fold (2368)	Metabolism	other localisation		Ec-15_000040	EsV-1-7 domain protein (296)	Cellular regulation and signalling	other localisation
Ec-06_004610	Insulin-like growth factor binding protein, N-terminal (6802)	Cellular regulation and signalling	other localisation		Ec-15_000620	WSC-domain containing protein (440)	Cell wall and extracellular	other localisation
Ec-06_007420	P-loop containing nucleoside triphosphate hydrolase (642)	Metabolism	other localisation		Ec-15_001590	Transient Receptor Potential Channel (1236)	Membrane function and transporters	other localisation
Ec-06_007430	Tetratricopeptide-like helical domain (675)	Protein binding or modification	other localisation		Ec-15_002050	SET domain (331)	DNA or chromatin modification	other localisation
Ec-06_007440	Hypothetical protein (86)	Unknown	other localisation		Ec-15_003530	Protein phosphatase 2C (PP2C)-like domain (274)	Cellular regulation and signalling	other localisation
Ec-06_008070	Domain of unknown function DUF4205 (777)	Unknown	other localisation		Ec-15_004520	expressed unknown protein (409)	Unknown	other localisation
Ec-06_008080	Hypothetical protein (82)	Unknown	other localisation		Ec-15_004730	LRR-GTPase of the ROCO family (1244)	Cellular regulation and signalling	other localisation
Ec-06_008150	Sec7 and Pleckstrin homology domain protein (1108)	Cellular regulation and signalling	other localisation		Ec-16_000320	SANT/Myb/Homeodomain-like protein (165)	Transcription	other localisation
Ec-06_009130	PAS domain (125)	Cellular regulation and signalling	other localisation		Ec-16_000930	P-loop containing nucleoside triphosphate hydrolase (660)	Metabolism	other localisation
Ec-06_009320	hypothetical protein (258)	Unknown	other localisation		Ec-16_000970	Alpha/Beta hydrolase fold (305)	Metabolism	other localisation
Ec-06_009470	conserved unknown protein (491)	Unknown	other localisation		Ec-16_002250	Exostosin-like (373)	Metabolism	other localisation
Ec-06_009750	hypothetical protein (1492)	Unknown	other localisation		Ec-16_002740	Nucleophile aminohydrolases, N-terminal (867)	Metabolism	other localisation
Ec-07_000130	hypothetical protein (90)	Unknown	other localisation		Ec-16_002820	hypothetical protein (644)	Unknown	other localisation
Ec-07_000140	Nucleoside diphosphate kinase (416)	Metabolism	other localisation		Ec-16_003150	Arf2A, ARF family GTPase (187)	Cellular regulation and signalling	other localisation
Ec-07_000260	WD40/YVTN repeat-like-containing domain (1570)	Protein binding or modification	other localisation		Ec-16_003160	F-box domain (582)	Proteolysis	other localisation
Ec-07_000640	Hypothetical protein (65)	Unknown	other localisation		Ec-16_003240	P-loop containing nucleoside triphosphate hydrolase (194)	Cellular regulation and signalling	other localisation
Ec-07_000650	Glycosyltransferase, family GT47 (227)	Metabolism	other localisation		Ec-16_003250	hypothetical protein (189)	Unknown	other localisation
Ec-07_000700	Pectin lyase fold/virulence factor (371)	Cell wall and extracellular	other localisation		Ec-16_003960	NB-ARC and TPR repeat-containing protein (2363)	Defence	other localisation
Ec-07_000720	Forkhead-associated (FHA) domain (1821)	Cellular regulation and signalling	other localisation		Ec-16_004200	similar to S-antigen protein (1393)	Unknown	other localisation
Ec-07_000770	Hypothetical protein (365)	Unknown	other localisation		Ec-16_004750	EsV-1-209 (413)	Transposon or viral gene	other localisation
Ec-07_000910	conserved unknown protein (284)	Unknown	other localisation		Ec-16_005180	K Homology domain, type 1 (216)	RNA modification or binding	other localisation
Ec-07_002130	Tetratricopeptide-like helical domain (1955)	Protein binding or modification	other localisation		Ec-17_000340	hypothetical protein (297)	Unknown	other localisation
Ec-07_002250	RGS domain (467)	Cellular regulation and signalling	other localisation		Ec-17_000810	expressed unknown protein (366)	Unknown	other localisation
Ec-07_003260	BTB/POZ fold (708)	Protein binding or modification	other localisation		Ec-17_001210	expressed unknown protein (447)	Unknown	other localisation
Ec-07_003830	MAPK related serine/threonine protein kinase (493)	Cellular regulation and signalling	other localisation		Ec-17_001760	Quinonprotein alcohol dehydrogenase-like domain (687)	Metabolism	other localisation
Ec-07_004040	Ankyrin repeat-containing domain (440)	Membrane function and transporters	other localisation		Ec-17_001870	Quinonprotein alcohol dehydrogenase-like domain (542)	Metabolism	other localisation
Ec-07_004380	Hypothetical protein (75)	Unknown	other localisation		Ec-17_002860	Phosphate transporter (181)	Membrane function and transporters	other localisation
Ec-07_004390	Hypothetical protein (84)	Unknown	other localisation		Ec-17_003060	WGR domain (950)	Unknown	other localisation
Ec-07_004560	conserved unknown protein (530)	Unknown	other localisation		Ec-17_004250	hypothetical protein (327)	Unknown	other localisation
Ec-07_005690	conserved unknown protein (208)	Unknown	other localisation		Ec-18_000060	Immunoglobulin E-set (553)	Protein binding or modification	other localisation
Ec-07_006190	Hypothetical protein (162)	Unknown	other localisation		Ec-18_001240	expressed unknown protein (139)	Unknown	other localisation
Ec-07_006310	SANT/Myb domain (227)	Transcription	other localisation		Ec-18_001290	mannitol 1-phosphate dehydrogenase (554)	Metabolism	other localisation
Ec-07_007110	ELM2 domain (1128)	DNA or chromatin modification	other localisation		Ec-18_001330	Major facilitator superfamily domain (715)	Membrane function and transporters	other localisation
Ec-07_007200	expressed unknown protein (63)	Unknown	other localisation		Ec-18_002780	Hypothetical protein (399)	Unknown	other localisation
Ec-07_007260	Cytochrome P450 (537)	Metabolism	other localisation		Ec-18_004150	expressed unknown protein (158)	Unknown	other localisation
Ec-08_000450	C6HC-type zinc finger and E3 ubiquitin ligase RBR domain protein (559)	Proteolysis	other localisation		Ec-18_004290	Protein kinase (934)	Cellular regulation and signalling	other localisation
Ec-08_000530	hypothetical protein (296)	Unknown	other localisation		Ec-19_000290	LRR-GTPase of the ROCO family, incomplete sequence (1092)	Cellular regulation and signalling	other localisation
Ec-08_000910	Pectin lyase fold/virulence factor (1266)	Cell wall and extracellular	other localisation		Ec-19_000500	Spondin, N-terminal (203)	Cell wall and extracellular	other localisation
Ec-08_001060	hypothetical protein (1077)	Unknown	other localisation		Ec-19_000590	Spondin, N-terminal (169)	Cell wall and extracellular	other localisation
Ec-08_002970	conserved unknown protein (424)	Unknown	other localisation		Ec-19_000600	Spondin, N-terminal (184)	Cell wall and extracellular	other localisation
Ec-08_003200	Tetratricopeptide-like helical domain (747)	Protein binding or modification	other localisation		Ec-19_000690	Spondin, N-terminal (225)	Cell wall and extracellular	other localisation
Ec-08_003920	Ankyrin Repeat Transient Receptor Potential Channel (1671)	Membrane function and transporters	other localisation		Ec-19_000700	Spondin, N-terminal (209)	Cell wall and extracellular	other localisation
Ec-08_004020	expressed unknown protein (570)	Unknown	other localisation		Ec-19_001800	hypothetical protein (137)	Unknown	other localisation
Ec-08_004230	NB-ARC and TPR repeat-containig protein (1374)	Defence	other localisation		Ec-19_001810	hypothetical protein (393)	Unknown	other localisation
Ec-08_004240	Tetratricopeptide-like helical domain (130)	Protein binding or modification	other localisation		Ec-19_003650	conserved unknown protein (738)	Unknown	other localisation
Ec-08_005280	conserved unknown protein (573)	Unknown	other localisation		Ec-19_003970	conserved unknown protein (269)	Unknown	other localisation
Ec-08_005400	hypothetical protein (926)	Unknown	other localisation		Ec-20_000760	MORN motif (411)	Cellular regulation and signalling	other localisation
Ec-08_005880	hypothetical protein (153)	Unknown	other localisation		Ec-20_002320	expressed unknown protein (265)	Unknown	other localisation
Ec-08_005910	WW domain (239)	Protein binding or modification	other localisation		Ec-20_002570	hypothetical protein (937)	Unknown	other localisation
Ec-08_006430	expressed unknown protein (336)	Unknown	other localisation		Ec-20_003250	Zinc finger, CCCH-type (587)	Cellular regulation and signalling	other localisation
Ec-09_001120	similar to ankyrin 2,3/unc44 (153)	Membrane function and transporters	other localisation		Ec-21_000080	hypothetical protein (491)	Unknown	other localisation
Ec-09_001360	Kinesin motor domain protein (1048)	Cytoskeleton and flagella	other localisation		Ec-21_000920	Zn(2)-C6 fungal-type DNA-binding domain (782)	Transcription	other localisation
Ec-09_001620	Sulfotransferase (589)	Metabolism	other localisation		Ec-21_000930	Zn(2)-C6 fungal-type DNA-binding domain (802)	Transcription	other localisation
Ec-09_001630	P-loop containing nucleoside triphosphate hydrolase (185)	Metabolism	other localisation		Ec-21_002110	PC-Esterase (505)	Metabolism	other localisation
Ec-09_001820	Sulphate transporter (1204)	Membrane function and transporters	other localisation		Ec-21_002240	Ubiquitin-like (378)	Proteolysis	other localisation
Ec-09_001840	Sulphate transporter (869)	Membrane function and transporters	other localisation		Ec-21_002250	Ankyrin repeat-containing domain (572)	Membrane function and transporters	other localisation
Ec-09_002410	Orn/DAP/Arg decarboxylase 2, N-terminal (136)	Metabolism	other localisation		Ec-21_002330	hypothetical protein (1588)	Unknown	other localisation
Ec-09_002430	P-loop containing nucleoside triphosphate hydrolase (519)	Metabolism	other localisation		Ec-21_002460	Heat shock protein 70 - putative (606)	Stress response	other localisation
Ec-09_002540	WD40/YVTN repeat-like-containing domain (170)	Protein binding or modification	other localisation		Ec-21_002490	Hypothetical leucine rich repeat protein (614)	Cellular regulation and signalling	other localisation
Ec-09_002830	WD40-repeat-containing domain (2323)	Protein binding or modification	other localisation		Ec-21_002500	expressed unknown protein (180)	Unknown	other localisation
Ec-09_002990	EF-hand domain pair (2203)	Cellular regulation and signalling	other localisation		Ec-21_003710	Hypothetical leucine rich repeat protein (1278)	Cellular regulation and signalling	other localisation
Ec-09_003040	hypothetical protein (374)	Unknown	other localisation		Ec-21_003770	Von Willebrand factor type A (vWA) domain (549)	Cell wall and extracellular	other localisation
Ec-09_004000	UAA transporter (616)	Membrane function and transporters	other localisation		Ec-21_003780	Importin subunit alpha (576)	Membrane function and transporters	other localisation
Ec-09_004230	Pectin lyase fold (1282)	Cell wall and extracellular	other localisation		Ec-21_004080	Ankyrin repeat-containing domain (1339)	Membrane function and transporters	other localisation
Ec-09_004830	Ankyrin repeat-containing domain (606)	Membrane function and transporters	other localisation		Ec-21_005510	expressed unknown protein (384)	Unknown	other localisation
Ec-10_000150	Ion transport domain (1677)	Membrane function and transporters	other localisation		Ec-22_000870	expressed unknown protein (160)	Unknown	other localisation
Ec-10_000540	Pleckstrin homology domain (915)	Cellular regulation and signalling	other localisation		Ec-22_001190	Hypothetical protein (75)	Unknown	other localisation
Ec-10_000820	hypothetical protein (475)	Unknown	other localisation		Ec-22_001630	hypothetical protein (1204)	Unknown	other localisation
Ec-10_000930	hypothetical protein (140)	Unknown	other localisation		Ec-22_002020	hypothetical protein (79)	Unknown	other localisation
Ec-10_000940	Hypothetical protein (94)	Unknown	other localisation		Ec-22_003060	Cellulose synthase (UDP-forming), family GT2 (858)	Cell wall and extracellular	other localisation
Ec-10_002500	Lactonase domain-containing protein (543)	Metabolism	other localisation		Ec-22_003090	Cation efflux protein (523)	Membrane function and transporters	other localisation
Ec-10_002830	RGS domain (1330)	Cellular regulation and signalling	other localisation		Ec-22_003110	Hypothetical protein (133)	Unknown	other localisation
Ec-10_004210	imm upregulated 12 (262)	Unknown	other localisation		Ec-22_003870	Dicer (1558)	RNA modification or binding	other localisation
Ec-10_004630	serine/threonine protein kinase (453)	Cellular regulation and signalling	other localisation		Ec-23_000080	expressed unknown protein (268)	Unknown	other localisation
Ec-10_005840	conserved unknown protein (413)	Unknown	other localisation		Ec-23_000850	Histidine kinase-like ATPase, C-terminal domain (664)	Cellular regulation and signalling	other localisation
Ec-10_006390	Multiple C2 domains (3940)	Cellular regulation and signalling	other localisation		Ec-23_001280	Transient receptor potential channel, canonical (1843)	Membrane function and transporters	other localisation
Ec-11_000060	expressed unknown protein (101)	Unknown	other localisation		Ec-23_001310	expressed unknown protein (283)	Unknown	other localisation
Ec-11_000170	Cyclic nucleotide-binding-like (574)	Cellular regulation and signalling	other localisation		Ec-23_002290	Alpha/Beta hydrolase fold (1237)	Metabolism	other localisation
Ec-11_000310	conserved unknown protein (144)	Unknown	other localisation		Ec-23_002560	NAD-dependent epimerase/dehydratase, N-terminal domain (283)	Metabolism	other localisation
Ec-11_001300	Protein phosphatase 2C (PP2C)-like domain (452)	Cellular regulation and signalling	other localisation		Ec-23_002570	Nucleotide-diphospho-sugar transferases (537)	Metabolism	other localisation
Ec-11_001330	conserved unknown protein (625)	Unknown	other localisation		Ec-23_003490	hypothetical protein (177)	Unknown	other localisation
Ec-11_001410	Triose-phosphate transporter domain (904)	Membrane function and transporters	other localisation		Ec-23_003530	Glycoside hydrolase, catalytic domain (325)	Metabolism	other localisation
Ec-11_001490	hypothetical protein (1212)	Unknown	other localisation		Ec-24_000490	EsV-1-7 domain protein (169)	Cellular regulation and signalling	other localisation
Ec-11_001510	Triose-phosphate transporter domain (918)	Membrane function and transporters	other localisation		Ec-24_000700	conserved unknown protein (1225)	Unknown	other localisation
Ec-11_001520	hypothetical protein (102)	Unknown	other localisation		Ec-24_001100	Ankyrin repeat-containing domain (1762)	Membrane function and transporters	other localisation
Ec-11_001660	EF-hand domain pair (932)	Cellular regulation and signalling	other localisation		Ec-24_002090	Short-chain dehydrogenase/reductase SDR (257)	Metabolism	other localisation
Ec-11_001680	Hypothetical protein (77)	Unknown	other localisation		Ec-24_002190	Regulator of chromosome condensation 1/beta-lactamase-inhibitor protein II (322)	DNA or chromatin modification	other localisation
Ec-11_001710	Hypothetical protein (64)	Unknown	other localisation		Ec-24_003000	P-loop containing nucleoside triphosphate hydrolase (438)	Metabolism	other localisation
Ec-11_001720	Hypothetical protein (76)	Unknown	other localisation		Ec-24_004270	conserved unknown protein (1120)	Unknown	other localisation
Ec-11_002280	Protein kinase-like domain (1268)	Cellular regulation and signalling	other localisation		Ec-25_001510	Pectin lyase fold/virulence factor (2073)	Cell wall and extracellular	other localisation
Ec-11_002400	hypothetical protein (274)	Unknown	other localisation		Ec-25_001890	C2H2 zinc finger protein (1412)	Transcription	other localisation
Ec-11_002870	conserved unknown protein (188)	Unknown	other localisation		Ec-25_002260	Alpha/Beta hydrolase fold (332)	Metabolism	other localisation
Ec-11_003370	expressed unknown protein (88)	Unknown	other localisation		Ec-25_002270	Alpha/Beta hydrolase fold (334)	Metabolism	other localisation
Ec-11_003510	RGS domain (464)	Cellular regulation and signalling	other localisation		Ec-25_002430	Pectin lyase fold/virulence factor (1052)	Cell wall and extracellular	other localisation
Ec-11_005680	HAD-like domain (297)	Metabolism	other localisation		Ec-25_003290	Glycosyltransferase AER61, uncharacterised (718)	Metabolism	other localisation
Ec-11_005710	FerIin domain (2056)	Metabolism	other localisation		Ec-25_003480	Tetratricopeptide repeat containing protein (192)	Protein binding or modification	other localisation
Ec-11_005800	cAMP-dependent protein kinase catalytic subunit (899)	Cellular regulation and signalling	other localisation		Ec-26_000300	expressed unknown protein (251)	Unknown	other localisation
Ec-11_006290	Hypothetical leucine rich repeat protein (350)	Cellular regulation and signalling	other localisation		Ec-26_000630	Hypothetical protein (66)	Unknown	other localisation
Ec-12_001120	Amino acid-binding ACT (646)	Cellular regulation and signalling	other localisation		Ec-26_001220	hypothetical protein (178)	Unknown	other localisation
Ec-12_001600	WW domain (127)	Protein binding or modification	other localisation		Ec-26_001230	Hypothetical protein (320)	Unknown	other localisation
Ec-12_002370	hypothetical protein (210)	Unknown	other localisation		Ec-26_001550	Nucleotide-diphospho-sugar transferase (404)	Metabolism	other localisation
Ec-12_003300	Hypothetical leucine rich repeat protein (1276)	Cellular regulation and signalling	other localisation		Ec-26_001590	hypothetical protein (200)	Unknown	other localisation
Ec-12_003550	Glycosyltransferase AER61, uncharacterised (160)	Metabolism	other localisation		Ec-26_001630	expressed unknown protein (159)	Unknown	other localisation
Ec-12_003630	Galactose-3-O-sulfotransferase (391)	Metabolism	other localisation		Ec-26_001830	Kynurenine 3-Monooxygenase (336)	Metabolism	other localisation
Ec-12_003680	similar to putative alpha-6-fucosyltransferase (165)	Metabolism	other localisation		Ec-26_002530	expressed unknown protein (906)	Unknown	other localisation
Ec-12_003720	Hypothetical protein (700)	Unknown	other localisation		Ec-26_002690	conserved unknown protein (169)	Unknown	other localisation
Ec-12_003740	Hypothetical protein (343)	Unknown	other localisation		Ec-26_003630	Aryl sulfotransferase (334)	Metabolism	other localisation
Ec-12_003960	conserved unknown protein (662)	Unknown	other localisation		Ec-26_004580	hypothetical protein (283)	Unknown	other localisation
Ec-12_004180	EGF-like domain, extracellular (638)	Cellular regulation and signalling	other localisation		Ec-26_005230	Major facilitator superfamily domain (666)	Membrane function and transporters	other localisation
Ec-12_004430	Poly(ADP-ribose) polymerase, catalytic domain (456)	DNA or chromatin modification	other localisation		Ec-26_005690	hypothetical protein (1269)	Unknown	other localisation
Ec-12_005260	Kelch-type beta propeller (507)	Metabolism	other localisation		Ec-27_001480	expressed unknown protein (269)	Unknown	other localisation
Ec-12_005360	conserved unknown protein (784)	Unknown	other localisation		Ec-27_002040	Protein kinase domain (740)	Cellular regulation and signalling	other localisation
Ec-12_006660	Heat Shock transcription factor (331)	Transcription	other localisation		Ec-27_004110	expressed unknown protein (81)	Unknown	other localisation
Ec-12_006990	Chromosome segregation protein (996)	DNA or chromatin modification	other localisation		Ec-27_005650	expressed unknown protein (692)	Unknown	other localisation
Ec-12_008120	GPS motif (1401)	Membrane function and transporters	other localisation		Ec-27_006430	hypothetical protein (461)	Unknown	other localisation
Ec-12_008650	expressed unknown protein (428)	Unknown	other localisation		Ec-27_006650	Hypothetical protein (68)	Unknown	other localisation
Ec-12_008800	hypothetical protein (343)	Unknown	other localisation		Ec-27_006660	TALE homeobox domain transcription factor (825)	Transcription	other localisation
Ec-12_008830	similar to DAZ interacting protein 1-like isoform 1 (961)	Cytoskeleton and flagella	other localisation		Ec-28_000020	DEP domain (100)	Cellular regulation and signalling	other localisation
Ec-13_000200	expressed unknown protein (80)	Unknown	other localisation		Ec-28_002260	Alpha/Beta hydrolase fold (347)	Metabolism	other localisation
Ec-13_000330	FNIP (986)	Unknown	other localisation		Ec-28_003270	expressed unknown protein (248)	Unknown	other localisation
Ec-13_000340	Glutathione S-transferase (207)	Redox	other localisation		Ec-28_003420	hypothetical protein (841)	Unknown	other localisation
Ec-13_000350	expressed unknown protein (251)	Unknown	other localisation		Ec-28_003610	Voltage-dependent channel, four helix bundle domain (843)	Membrane function and transporters	other localisation
Ec-13_001140	EsV-1-7 domain protein (363)	Cellular regulation and signalling	other localisation		Ec-28_003810	Metacaspase (2418)	Cellular regulation and signalling	other localisation
Ec-13_001160	Hypothetical protein (122)	Unknown	other localisation		Ec-01_011190	conserved unknown protein (284)	Unknown	signal anchor
Ec-13_001170	Ctr copper transporter (167)	Membrane function and transporters	other localisation		Ec-02_001110	RGS domain (534)	Cellular regulation and signalling	signal anchor
Ec-13_001200	Ankyrin repeat-containing domain (330)	Membrane function and transporters	other localisation		Ec-06_003570	conserved unknown protein (409)	Unknown	signal anchor
Ec-13_001750	High mobility group domain protein (487)	DNA or chromatin modification	other localisation		Ec-07_002460	Uncharacterised domain, di-copper centre (741)	Unknown	signal anchor
Ec-13_002010	Hypothetical leucine rich repeat protein (390)	Cellular regulation and signalling	other localisation		Ec-08_000170	Hypothetical protein (65)	Unknown	signal anchor
Ec-13_002060	Protein phosphatase 2C (426)	Cellular regulation and signalling	other localisation		Ec-08_003130	expressed unknown protein (120)	Unknown	signal anchor
Ec-13_004170	hypothetical protein (611)	Unknown	other localisation		Ec-08_005020	expressed unknown protein (475)	Unknown	signal anchor
Ec-13_004610	Hypothetical leucine rich repeat protein (718)	Cellular regulation and signalling	other localisation		Ec-09_002030	FMN-binding split barrel (274)	Metabolism	signal anchor
Ec-13_004780	hypothetical protein (558)	Unknown	other localisation		Ec-10_002310	WW domain (636)	Protein binding or modification	signal anchor
Ec-13_004850	hypothetical protein (539)	Unknown	other localisation		Ec-10_005050	WW domain (502)	Protein binding or modification	signal anchor
Ec-14_000960	expressed unknown protein (1428)	Unknown	other localisation		Ec-11_003470	RGS domain (430)	Cellular regulation and signalling	signal anchor
Ec-14_002200	hypothetical protein (1646)	Unknown	other localisation		Ec-13_003220	expressed unknown protein (65)	Unknown	signal anchor
Ec-14_002990	NAD(P)-binding domain (260)	Metabolism	other localisation		Ec-13_003460	hypothetical protein (112)	Unknown	signal anchor
Ec-14_003300	SET domain and Rubisco LSMT substrate-binding domain protein (720)	DNA or chromatin modification	other localisation		Ec-13_003760	Hypothetical protein (104)	Unknown	signal anchor
Ec-14_004040	Hypothetical protein (73)	Unknown	other localisation		Ec-16_002170	conserved unknown protein (662)	Unknown	signal anchor
Ec-14_005240	Hypothetical protein (126)	Unknown	other localisation		Ec-16_003230	Hypothetical protein (52)	Unknown	signal anchor
Ec-14_005390	conserved unknown protein (1800)	Unknown	other localisation		Ec-17_004240	expressed unknown protein (341)	Unknown	signal anchor
Ec-14_005430	Band 7 protein (435)	Membrane function and transporters	other localisation		Ec-21_005440	conserved unknown protein (353)	Unknown	signal anchor
Ec-14_005700	expressed unknown protein (904)	Unknown	other localisation		Ec-22_000910	expressed unknown protein (571)	Unknown	signal anchor
Ec-14_005730	Metallo-dependent phosphatase-like (824)	Cellular regulation and signalling	other localisation		Ec-23_001740	Notch domain (470)	Cellular regulation and signalling	signal anchor
Ec-14_006720	HECT (2218)	Unknown	other localisation		Ec-24_002450	hypothetical protein (1220)	Unknown	signal anchor
Ec-15_000020	lipase (352)	Metabolism	other localisation		Ec-24_003400	Patched (849)	Cellular regulation and signalling	signal anchor
Ec-15_000030	Hypothetical protein (125)	Unknown	other localisation		Ec-25_000360	expressed unknown protein (637)	Unknown	signal anchor
Ec-15_000200	hypothetical protein (66)	Unknown	other localisation		Ec-26_001650	ABC transporter-like (1429)	Membrane function and transporters	signal anchor
Ec-15_000240	Alpha/Beta hydrolase fold (391)	Metabolism	other localisation		Ec-26_000310	Catalase	Redox	signal peptide
Ec-15_000520	SNF2-related, helicase, ISW1, SANT and SLIDE domain protein (1051)	DNA or chromatin modification	other localisation		Ec-00_001900	WSC and cellulose-binding domain protein (906)	Cell wall and extracellular	signal peptide
Ec-15_000630	WSC-domain containing protein (570)	Cell wall and extracellular	other localisation		Ec-00_004680	Hypothetical protein (59)	Unknown	signal peptide
Ec-15_000770	Hypothetical leucine rich repeat protein (516)	Cellular regulation and signalling	other localisation		Ec-00_007250	Carbohydrate-binding WSC, subgroup (231)	Cell wall and extracellular	signal peptide
Ec-15_000920	Sept2, septin GTPase (434)	Cytoskeleton and flagella	other localisation		Ec-00_007780	Carbohydrate-binding WSC (689)	Cell wall and extracellular	signal peptide
Ec-15_000950	conserved unknown protein (275)	Unknown	other localisation		Ec-00_008300	hypothetical protein (434)	Unknown	signal peptide
Ec-15_001220	transposase (654)	Transposon or viral gene	other localisation		Ec-00_010740	Similar to EsV-1-166 (188)	Cell wall and extracellular	signal peptide
Ec-15_001240	hypothetical protein (672)	Unknown	other localisation		Ec-01_007880	Alkaline-phosphatase-like, core domain (512)	Cellular regulation and signalling	signal peptide
Ec-15_001430	ICP0-binding domain of Ubiquitin-specific protease 7 (913)	Proteolysis	other localisation		Ec-01_008070	Glycoside-hydrolase family GH114, TIM-barrel domain (373)	Metabolism	signal peptide
Ec-15_001820	Protein kinase-like domain (65)	Cellular regulation and signalling	other localisation		Ec-01_009940	Pathogenesis-related protein, class 1 (320)	Defence	signal peptide
Ec-15_003140	vanadium-dependent haloperoxidase-like (403)	Metabolism	other localisation		Ec-02_000020	Leucine rich repeat receptor kinase (1188)	Cellular regulation and signalling	signal peptide
Ec-15_003220	Hypothetical protein (142)	Unknown	other localisation		Ec-02_000560	hypothetical protein (277)	Unknown	signal peptide
Ec-15_003230	Hypothetical leucine rich repeat protein (340)	Cellular regulation and signalling	other localisation		Ec-02_002080	hypothetical protein (464)	Unknown	signal peptide
Ec-15_003410	hypothetical protein (737)	Unknown	other localisation		Ec-02_002650	expressed unknown protein (535)	Unknown	signal peptide
Ec-15_004840	LRR-GTPase of the ROCO family (1283)	Cellular regulation and signalling	other localisation		Ec-02_002660	expressed unknown protein (699)	Unknown	signal peptide
Ec-16_000870	Kinesin motor domain (1860)	Cytoskeleton and flagella	other localisation		Ec-02_003130	expressed unknown protein (215)	Unknown	signal peptide
Ec-16_002610	Ankyrin repeat-containing domain (1477)	Membrane function and transporters	other localisation		Ec-03_002200	Tissue inhibitor of metalloproteinases-like, OB-fold (287)	Proteolysis	signal peptide
Ec-16_002910	expressed unknown protein (249)	Unknown	other localisation		Ec-05_003230	hypothetical protein (48)	Unknown	signal peptide
Ec-16_003310	Transcription Factor IIF, Rap30/Rap74, interaction (448)	Transcription	other localisation		Ec-05_005670	expressed unknown protein (357)	Unknown	signal peptide
Ec-16_004140	hypothetical protein (1404)	Unknown	other localisation		Ec-05_006600	PC-Esterase (378)	Metabolism	signal peptide
Ec-16_004150	hypothetical protein (199)	Unknown	other localisation		Ec-05_006770	hypothetical protein (291)	Unknown	signal peptide
Ec-16_004300	Sulfotransferase (526)	Metabolism	other localisation		Ec-06_001770	expressed unknown protein (173)	Unknown	signal peptide
Ec-16_004970	Uncharacterised protein family, transmembrane-17 (172)	Unknown	other localisation		Ec-06_002440	Peptidase C15, pyroglutamyl peptidase I-like (250)	Proteolysis	signal peptide
Ec-17_000080	hypothetical protein (658)	Unknown	other localisation		Ec-06_007850	conserved unknown protein (179)	Unknown	signal peptide
Ec-17_000300	Hypothetical protein (350)	Unknown	other localisation		Ec-07_000030	Major facilitator superfamily (391)	Membrane function and transporters	signal peptide
Ec-17_001130	FAM184 family (1192)	Unknown	other localisation		Ec-07_000280	Spondin, N-terminal (219)	Cell wall and extracellular	signal peptide
Ec-17_002570	VTC domain (662)	Vesicle trafficking and secretion	other localisation		Ec-07_002600	expressed unknown protein (520)	Unknown	signal peptide
Ec-17_003950	calmodulin-like myosin-light chain (6615)	Cytoskeleton and flagella	other localisation		Ec-07_002630	Notch domain (265)	Cellular regulation and signalling	signal peptide
Ec-17_004190	Hypothetical protein (183)	Unknown	other localisation		Ec-07_002660	Hypothetical protein (107)	Unknown	signal peptide
Ec-17_004200	Glycoside hydrolase superfamily (898)	Metabolism	other localisation		Ec-09_000110	Galactose-binding domain-like (705)	Metabolism	signal peptide
Ec-17_004360	Galactose-binding domain-like (503)	Metabolism	other localisation		Ec-09_000480	SGNH hydrolase-type esterase domain (473)	Metabolism	signal peptide
Ec-17_004380	Hypothetical protein (165)	Unknown	other localisation		Ec-09_000520	Six-bladed beta-propeller, TolB-like (1099)	Unknown	signal peptide
Ec-18_000180	WD40/YVTN repeat-like-containing domain (1181)	Protein binding or modification	other localisation		Ec-09_000570	Carbohydrate-binding WSC, subgroup (1007)	Cell wall and extracellular	signal peptide
Ec-18_000200	hypothetical protein (254)	Unknown	other localisation		Ec-09_001190	RGS domain (377)	Cellular regulation and signalling	signal peptide
Ec-18_000210	expressed unknown protein (993)	Unknown	other localisation		Ec-09_001330	SGNH hydrolase-type esterase domain (441)	Metabolism	signal peptide
Ec-18_000580	Protein kinase (987)	Cellular regulation and signalling	other localisation		Ec-09_001560	hypothetical protein (389)	Unknown	signal peptide
Ec-18_000890	hypothetical protein (83)	Unknown	other localisation		Ec-09_001570	expressed unknown protein (423)	Unknown	signal peptide
Ec-18_000960	Hypothetical protein (63)	Unknown	other localisation		Ec-09_004390	Hypothetical protein (347)	Unknown	signal peptide
Ec-18_000970	Hypothetical protein (94)	Unknown	other localisation		Ec-09_004430	hypothetical protein (365)	Unknown	signal peptide
Ec-18_000980	Hypothetical protein (81)	Unknown	other localisation		Ec-10_002000	Leucine-rich repeat, typical subtype (426)	Cellular regulation and signalling	signal peptide
Ec-18_001930	expressed unknown protein (163)	Unknown	other localisation		Ec-10_002030	hypothetical protein (728)	Unknown	signal peptide
Ec-18_002120	conserved unknown protein (180)	Unknown	other localisation		Ec-10_002050	hypothetical protein (640)	Unknown	signal peptide
Ec-18_002170	EF-hand domain pair (456)	Cellular regulation and signalling	other localisation		Ec-10_002410	Regulator of chromosome condensation 1/beta-lactamase-inhibitor protein II (519)	DNA or chromatin modification	signal peptide
Ec-18_002620	EsV-1-7 domain protein (377)	Cellular regulation and signalling	other localisation		Ec-10_003070	Metallo-peptidase family M12B Reprolysin-like (959)	Proteolysis	signal peptide
Ec-18_002910	calmodulin-binding WW domain protein (3977)	Cellular regulation and signalling	other localisation		Ec-10_003100	von Willebrand factor, type A (329)	Cell wall and extracellular	signal peptide
Ec-18_003000	Hypothetical protein (64)	Unknown	other localisation		Ec-10_003370	hypothetical protein (1808)	Unknown	signal peptide
Ec-18_003010	SANT/Myb/Homeodomain-like protein (471)	Transcription	other localisation		Ec-10_003390	expressed unknown protein (1536)	Unknown	signal peptide
Ec-18_003930	expressed unknown protein (90)	Unknown	other localisation		Ec-11_000400	Mannuronan C-5-epimerase (594)	Cell wall and extracellular	signal peptide
Ec-18_003940	RGS domain (87)	Cellular regulation and signalling	other localisation		Ec-11_004680	conserved unknown protein (406)	Unknown	signal peptide
Ec-18_004100	Hypothetical protein (118)	Unknown	other localisation		Ec-12_002760	RGS domain (370)	Cellular regulation and signalling	signal peptide
Ec-18_004110	Hypothetical protein (61)	Unknown	other localisation		Ec-12_006330	Pectin lyase fold/virulence factor (397)	Cell wall and extracellular	signal peptide
Ec-18_004130	Hypothetical protein (99)	Unknown	other localisation		Ec-13_001890	Conserved hypothetical protein (441)	Unknown	signal peptide
Ec-18_004740	Hypothetical leucine rich repeat protein (406)	Cellular regulation and signalling	other localisation		Ec-13_003060	Glucose/Sorbosone dehydrogenase (848)	Metabolism	signal peptide
Ec-19_000070	Ankyrin repeat (338)	Membrane function and transporters	other localisation		Ec-13_003230	expressed unknown protein (700)	Unknown	signal peptide
Ec-19_000220	expressed unknown protein (1099)	Unknown	other localisation		Ec-13_003240	expressed unknown protein (202)	Unknown	signal peptide
Ec-19_000240	conserved unknown protein (701)	Unknown	other localisation		Ec-13_003260	expressed unknown protein (101)	Unknown	signal peptide
Ec-19_000450	expressed unknown protein (112)	Unknown	other localisation		Ec-14_000190	Pectin lyase fold (1142)	Cell wall and extracellular	signal peptide
Ec-19_001140	GBP3, guanylate-binding proteins (646)	Cellular regulation and signalling	other localisation		Ec-14_000470	Hypothetical protein (80)	Unknown	signal peptide
Ec-19_002000	Domain of unknown function DUF4496 (557)	Unknown	other localisation		Ec-14_005160	Hypothetical protein (334)	Unknown	signal peptide
Ec-19_003360	hypothetical protein (2004)	Unknown	other localisation		Ec-14_005400	Enolase (481)	Metabolism	signal peptide
Ec-19_003740	conserved unknown protein (203)	Unknown	other localisation		Ec-15_000190	Alpha/Beta hydrolase fold (430)	Metabolism	signal peptide
Ec-19_003900	Hypothetical leucine rich repeat protein (507)	Cellular regulation and signalling	other localisation		Ec-16_000910	expressed unknown protein (330)	Unknown	signal peptide
Ec-19_003940	hypothetical protein (512)	Unknown	other localisation		Ec-16_002240	Exostosin-like (433)	Metabolism	signal peptide
Ec-19_004000	putative respiratory burst oxidase protein (929)	Metabolism	other localisation		Ec-16_003710	lipase (423)	Metabolism	signal peptide
Ec-19_004040	Cyclase-associated protein CAP/septum formation inhibitor MinC, C-terminal (1785)	Cytoskeleton and flagella	other localisation		Ec-17_004270	expressed unknown protein (199)	Unknown	signal peptide
Ec-19_004690	Tetratricopeptide-like helical domain (1432)	Protein binding or modification	other localisation		Ec-18_004070	Short-chain dehydrogenase/reductase SDR (391)	Metabolism	signal peptide
Ec-19_005170	Harbinger transposase-derived nuclease domain (522)	Transposon or viral gene	other localisation		Ec-18_004330	hypothetical protein (67)	Unknown	signal peptide
Ec-19_005180	hypothetical protein (236)	Unknown	other localisation		Ec-19_003540	conserved unknown protein (419)	Unknown	signal peptide
Ec-19_005310	hypothetical protein (181)	Unknown	other localisation		Ec-19_003550	imm downregulated 17 (183)	Unknown	signal peptide
Ec-19_005400	Hypothetical protein (380)	Unknown	other localisation		Ec-19_004020	conserved unknown protein (215)	Unknown	signal peptide
Ec-20_000090	Acyl CoA Synthase (1468)	Metabolism	other localisation		Ec-20_001150	Hypothetical secreted protein (154)	Unknown	signal peptide
Ec-20_000210	xanthine dehydrogenase (1412)	Metabolism	other localisation		Ec-20_002340	Mitochondrial carrier protein, putative (374)	Membrane function and transporters	signal peptide
Ec-20_000300	3'5'-cyclic nucleotide phosphodiesterase, catalytic domain (1006)	Cellular regulation and signalling	other localisation		Ec-20_004700	Mannuronan C-5-epimerase 4 (886)	Cell wall and extracellular	signal peptide
Ec-20_000900	Pleckstrin homology domain (1449)	Cellular regulation and signalling	other localisation		Ec-21_001410	hypothetical protein (292)	Unknown	signal peptide
Ec-20_001910	expressed unknown protein (100)	Unknown	other localisation		Ec-21_002420	hypothetical protein (842)	Unknown	signal peptide
Ec-20_002540	3'5'-cyclic nucleotide phosphodiesterase, catalytic domain (916)	Cellular regulation and signalling	other localisation		Ec-21_002470	expressed unknown protein (384)	Unknown	signal peptide
Ec-20_002860	Mannuronan C-5-epimerase C-terminal fragment (424)	Cell wall and extracellular	other localisation		Ec-21_003670	Solute carrier family 35 member SLC35F1/F2/F6 (377)	Membrane function and transporters	signal peptide
Ec-20_003120	hypothetical protein (547)	Unknown	other localisation		Ec-22_001980	Alpha/Beta hydrolase fold (450)	Metabolism	signal peptide
Ec-20_003300	Kinesin motor domain (2138)	Cytoskeleton and flagella	other localisation		Ec-22_002000	rRNA intron-encoded homing endonuclease (152)	DNA or chromatin modification	signal peptide
Ec-20_003320	Hypothetical protein (61)	Unknown	other localisation		Ec-22_003220	conserved unknown protein (1408)	Unknown	signal peptide
Ec-20_003330	Zinc finger, CCCH-type (575)	Cellular regulation and signalling	other localisation		Ec-23_002150	expressed unknown protein (518)	Unknown	signal peptide
Ec-20_003620	Lipoxygenase (731)	Metabolism	other localisation		Ec-23_002720	Glycerophosphodiester phosphodiesterase domain (417)	Metabolism	signal peptide
Ec-20_003820	conserved unknown protein (504)	Unknown	other localisation		Ec-23_003480	hypothetical protein (212)	Unknown	signal peptide
Ec-20_004410	Tyrosinase copper-binding domain (802)	Metabolism	other localisation		Ec-23_004220	Zinc/iron permease (505)	Membrane function and transporters	signal peptide
Ec-20_004710	kinesin-like protein (854)	Cytoskeleton and flagella	other localisation		Ec-24_001130	Mannuronan C-5-epimerase N-terminal fragment (285)	Cell wall and extracellular	signal peptide
Ec-21_000230	conserved unknown protein (64)	Unknown	other localisation		Ec-24_003810	von Willebrand factor, type A (357)	Cell wall and extracellular	signal peptide
Ec-21_000460	expressed unknown protein (328)	Unknown	other localisation		Ec-24_003880	glycin-rich protein (1239)	Cell wall and extracellular	signal peptide
Ec-21_000610	Hypothetical protein (79)	Unknown	other localisation		Ec-25_001570	Pectin lyase fold/virulence factor (1902)	Cell wall and extracellular	signal peptide
Ec-21_000710	hypothetical protein (581)	Unknown	other localisation		Ec-25_003420	Glycosyltransferase AER61, uncharacterised (670)	Metabolism	signal peptide
Ec-21_000800	AMMECR1 domain (835)	Unknown	other localisation		Ec-26_001450	Zinc/iron permease (514)	Membrane function and transporters	signal peptide
Ec-21_001340	Galactose-binding domain-like (1050)	Metabolism	other localisation		Ec-26_001560	Nucleotide-diphospho-sugar transferase (321)	Metabolism	signal peptide
Ec-21_001940	Hypothetical protein (131)	Unknown	other localisation		Ec-26_001580	P-loop containing nucleoside triphosphate hydrolase (401)	Metabolism	signal peptide
Ec-21_001950	Protein-tyrosine phosphatase-like (1020)	Cellular regulation and signalling	other localisation		Ec-26_001600	hypothetical protein (249)	Unknown	signal peptide
Ec-21_002520	retinitis pigmentosa 2 (X-linked recessive) (424)	Cytoskeleton and flagella	other localisation		Ec-26_003200	imm downregulated 8 (252)	Unknown	signal peptide
Ec-21_002860	Alpha/Beta hydrolase fold (563)	Metabolism	other localisation		Ec-26_003270	Secreted ankyrin repeat and cupin-like domain protein (536)	Membrane function and transporters	signal peptide
Ec-21_003600	hypothetical protein (972)	Unknown	other localisation		Ec-26_003280	Flavoprotein Monooxygenase (965)	Metabolism	signal peptide
Ec-21_003880	hypothetical protein (496)	Unknown	other localisation		Ec-26_004720	SGNH hydrolase-type esterase domain (431)	Metabolism	signal peptide
Ec-21_004670	Sterile alpha motif, type 1 (2749)	Cellular regulation and signalling	other localisation		Ec-28_001290	expressed unknown protein (98)	Unknown	signal peptide
Ec-21_004900	Galactose-binding domain-like (992)	Metabolism	other localisation		Ec-28_003290	Leucine rich repeat receptor kinase (1064)	Cellular regulation and signalling	signal peptide
Ec-21_005170	Armadillo-type fold (1140)	Cellular regulation and signalling	other localisation		Ec-28_003660	Notch domain (354)	Cellular regulation and signalling	signal peptide
Ec-21_006330	Hypothetical protein (80)	Unknown	other localisation
Ec-21_006520	Amidohydrolase 1 (464)	Metabolism	other localisation
Ec-21_006530	imm upregulated 7 (124)	Unknown	other localisation
Ec-22_000600	Protein kinase with ATPase domain (971)	Unknown	other localisation
Ec-22_001690	Hypothetical protein (71)	Unknown	other localisation
Ec-22_002160	Hypothetical leucine rich repeat protein (363)	Cellular regulation and signalling	other localisation
Ec-22_002210	von Willebrand factor, type A (349)	Cell wall and extracellular	other localisation
Ec-22_002220	expressed unknown protein (570)	Unknown	other localisation
Ec-22_002260	von Willebrand factor, type D domain (849)	Cell wall and extracellular	other localisation
Ec-22_002980	hypothetical protein (605)	Unknown	other localisation
Ec-22_003100	imm upregulated 8 (150)	Unknown	other localisation
Ec-22_004000	mannuronan C-5-epimerase internal fragment (113)	Cell wall and extracellular	other localisation
Ec-23_000020	mitogen-activated protein kinase (471)	Cellular regulation and signalling	other localisation
Ec-23_000100	Potassium channel, voltage-dependent, EAG/ELK/ERG (1350)	Membrane function and transporters	other localisation
Ec-23_000650	Dynein-1-alpha heavy chain (4694)	Cytoskeleton and flagella	other localisation
Ec-23_000920	Multi antimicrobial extrusion protein (596)	Membrane function and transporters	other localisation
Ec-23_003330	Machado-Joseph disease protein MJD (226)	Cellular regulation and signalling	other localisation
Ec-23_003440	expressed unknown protein (549)	Unknown	other localisation
Ec-23_003800	P-loop containing nucleoside triphosphate hydrolase (259)	Metabolism	other localisation
Ec-23_004240	imm upregulated 2 (299)	Unknown	other localisation
Ec-24_000280	EsV-1-7 domain protein (716)	Cellular regulation and signalling	other localisation
Ec-24_000570	Tctex-1 (75)	Cytoskeleton and flagella	other localisation
Ec-24_001140	Mannuronan C-5-epimerase (306)	Cell wall and extracellular	other localisation
Ec-24_001360	cGMP-dependent protein kinase (766)	Cellular regulation and signalling	other localisation
Ec-24_001930	Hypothetical protein (64)	Unknown	other localisation
Ec-24_001940	Zinc finger, RING-type (951)	Proteolysis	other localisation
Ec-24_002070	NAD(P)-binding domain (259)	Metabolism	other localisation
Ec-24_003060	Hypothetical protein (596)	Unknown	other localisation
Ec-24_003160	Hypothetical leucine rich repeat protein (340)	Cellular regulation and signalling	other localisation
Ec-24_003350	NAD(P)-binding domain (123)	Metabolism	other localisation
Ec-24_003450	CheY-like superfamily (1291)	Cellular regulation and signalling	other localisation
Ec-24_004340	Ankyrin repeat-containing domain (2036)	Membrane function and transporters	other localisation
Ec-25_000070	Hypothetical leucine rich repeat calmodulin binding protein (2664)	Cellular regulation and signalling	other localisation
Ec-25_000270	Acyl carrier protein-like (2053)	Metabolism	other localisation
Ec-25_000550	Triose-phosphate transporter domain (423)	Membrane function and transporters	other localisation
Ec-25_000610	hypothetical protein (942)	Unknown	other localisation
Ec-25_001020	hypothetical protein (401)	Unknown	other localisation
Ec-25_001050	hypothetical protein (136)	Unknown	other localisation
Ec-25_001100	Ankyrin repeat-containing domain (681)	Membrane function and transporters	other localisation
Ec-25_001220	Leucine rich repeat receptor kinase (1254)	Cellular regulation and signalling	other localisation
Ec-25_001720	PDZ domain (848)	Membrane function and transporters	other localisation
Ec-25_001820	NLI interacting factor (755)	Metabolism	other localisation
Ec-25_001860	hypothetical protein (3110)	Unknown	other localisation
Ec-25_003230	GMP phosphodiesterase, delta subunit (297)	Metabolism	other localisation
Ec-26_000080	MULE transposase domain (626)	Transposon or viral gene	other localisation
Ec-26_000600	PSP1, C-terminal (1057)	DNA or chromatin modification	other localisation
Ec-26_000680	expressed unknown protein (719)	Unknown	other localisation
Ec-26_002160	hypothetical protein (154)	Unknown	other localisation
Ec-26_002630	Acyl transferase/acyl hydrolase/lysophospholipase (513)	Metabolism	other localisation
Ec-26_002650	Pleckstrin homology-like domain (1417)	Cellular regulation and signalling	other localisation
Ec-26_002830	hypothetical protein (1613)	Unknown	other localisation
Ec-26_003370	EsV-1-7 domain protein (629)	Cellular regulation and signalling	other localisation
Ec-26_003510	expressed unknown protein (580)	Unknown	other localisation
Ec-26_003600	Glutaredoxin (202)	Redox	other localisation
Ec-26_005220	Mitochondrial substrate/solute carrier (294)	Membrane function and transporters	other localisation
Ec-26_006090	similar to leucine rich repeat containing 44 (1565)	Cellular regulation and signalling	other localisation
Ec-26_006240	expressed unknown protein (379)	Unknown	other localisation
Ec-26_006690	Hypothetical protein (143)	Unknown	other localisation
Ec-27_000960	Serine/threonine/dual specificity protein kinase, catalytic domain (2327)	Cellular regulation and signalling	other localisation
Ec-27_001140	Phytochrome-like protein 2 (594)	Cellular regulation and signalling	other localisation
Ec-27_001970	hypothetical protein (282)	Unknown	other localisation
Ec-27_004510	hypothetical protein (814)	Unknown	other localisation
Ec-27_005900	hypothetical protein (391)	Unknown	other localisation
Ec-27_005920	putative scytonemin-related tyrosinase (814)	Metabolism	other localisation
Ec-27_005960	EF-hand domain pair (3042)	Cellular regulation and signalling	other localisation
Ec-27_006610	expressed unknown protein (1098)	Unknown	other localisation
Ec-27_006820	Threonyl/alanyl tRNA synthetase, class II-like, putative editing domain (175)	RNA modification or binding	other localisation
Ec-28_000880	Hypothetical protein (70)	Unknown	other localisation
Ec-28_000900	Hypothetical protein (124)	Unknown	other localisation
Ec-28_001210	hypothetical protein (533)	Unknown	other localisation
Ec-28_001240	Set domain protein (105)	DNA or chromatin modification	other localisation
Ec-28_001870	expressed unknown protein (390)	Unknown	other localisation
Ec-28_002010	Protein of unknown function DUF583 (242)	Unknown	other localisation
Ec-28_002120	Protein of unknown function DUF583 (172)	Unknown	other localisation
Ec-28_002680	WD40-repeat-containing domain (4094)	Protein binding or modification	other localisation
Ec-28_002690	Carbohydrate-binding WSC, subgroup (885)	Cell wall and extracellular	other localisation
Ec-28_003110	Arf GTPase activating protein (741)	Cellular regulation and signalling	other localisation
Ec-28_003190	5-methyltetrahydropteroyltriglutamate--homocysteine S-methyltransferase (807)	Metabolism	other localisation
Ec-28_003690	Quinonprotein alcohol dehydrogenase-like superfamily (1855)	Metabolism	other localisation
Ec-28_003700	Ankyrin repeat-containing domain (1190)	Membrane function and transporters	other localisation
Ec-15_001010	Light harvesting complex protein (138)	Photosynthesis	other localisation
Ec-01_002640	expressed unknown protein (276)	Unknown	signal anchor
Ec-02_000530	RGS domain (827)	Cellular regulation and signalling	signal anchor
Ec-04_000730	Tyrosinase copper-binding domain (769)	Metabolism	signal anchor
Ec-04_004030	Transmembrane protein 107 (141)	Membrane function and transporters	signal anchor
Ec-05_000010	expressed unknown protein (420)	Unknown	signal anchor
Ec-07_001210	expressed unknown protein (183)	Unknown	signal anchor
Ec-08_001050	Hypothetical protein (91)	Unknown	signal anchor
Ec-08_006240	hypothetical protein (414)	Unknown	signal anchor
Ec-09_001110	Tyrosinase (715)	Metabolism	signal anchor
Ec-09_001650	P-loop containing nucleoside triphosphate hydrolase (373)	Metabolism	signal anchor
Ec-13_001680	Phosphate transporter (512)	Membrane function and transporters	signal anchor
Ec-15_003200	hypothetical protein (413)	Unknown	signal anchor
Ec-16_001600	Mpv17/PMP22 (136)	Membrane function and transporters	signal anchor
Ec-18_000100	Major Facilitator Superfamily (526)	Membrane function and transporters	signal anchor
Ec-18_000530	Fatty acid desaturase (514)	Metabolism	signal anchor
Ec-19_000090	expressed unknown protein (376)	Unknown	signal anchor
Ec-19_004170	Nitrate high affinity transporter (458)	Membrane function and transporters	signal anchor
Ec-19_004180	Nitrate high affinity transporter (458)	Membrane function and transporters	signal anchor
Ec-20_003180	RGS domain (458)	Cellular regulation and signalling	signal anchor
Ec-24_003300	Patched (964)	Cellular regulation and signalling	signal anchor
Ec-24_003990	Choline transporter-like (438)	Membrane function and transporters	signal anchor
Ec-28_002600	Major intrinsic protein (279)	Membrane function and transporters	signal anchor
Ec-28_003100	RGS domain (440)	Cellular regulation and signalling	signal anchor
Ec-28_003710	hypothetical protein (324)	Unknown	signal anchor
Ec-00_001000	ATPase family AAA domain-containing protein 3, domain of unknown function DUF3523 (706)	Membrane function and transporters	signal peptide
Ec-00_005750	Hypothetical protein (149)	Unknown	signal peptide
Ec-00_006340	ferric reductase (730)	Metabolism	signal peptide
Ec-00_006570	imm upregulated 4 (253)	Unknown	signal peptide
Ec-00_006590	EsV-1-163 (255)	Transposon or viral gene	signal peptide
Ec-00_009020	expressed unknown protein (161)	Unknown	signal peptide
Ec-00_009390	Pectin lyase fold/virulence factor (1533)	Cell wall and extracellular	signal peptide
Ec-00_009430	Hypothetical protein (37)	Unknown	signal peptide
Ec-00_009490	Pectin lyase fold (614)	Cell wall and extracellular	signal peptide
Ec-01_001290	AAA+ ATPase domain (1202)	Membrane function and transporters	signal peptide
Ec-01_002470	expressed unknown protein (397)	Unknown	signal peptide
Ec-01_003820	Glycoside hydrolase superfamily (339)	Metabolism	signal peptide
Ec-01_007620	conserved unknown protein (1096)	Unknown	signal peptide
Ec-01_012180	uncharacterized protein (8556)	Unknown	signal peptide
Ec-02_000040	Hypothetical protein (134)	Unknown	signal peptide
Ec-02_000470	Catalase-peroxidase haem (515)	Redox	signal peptide
Ec-02_002710	expressed unknown protein (160)	Unknown	signal peptide
Ec-02_002770	Hypothetical protein (185)	Unknown	signal peptide
Ec-02_003000	Unsaturated glucuronyl hydrolase, family GH88 (633)	Metabolism	signal peptide
Ec-02_003530	WSC and cellulose-binding domain protein (491)	Cell wall and extracellular	signal peptide
Ec-02_005080	Insulin-induced protein family (295)	Vesicle trafficking and secretion	signal peptide
Ec-03_001430	Hypothetical protein (51)	Unknown	signal peptide
Ec-03_002670	YHYH domain (398)	Transposon or viral gene	signal peptide
Ec-03_002910	Pectin lyase fold/virulence factor (986)	Cell wall and extracellular	signal peptide
Ec-03_003720	hypothetical protein (394)	Unknown	signal peptide
Ec-03_005100	WD40/YVTN repeat-like-containing domain (2211)	Protein binding or modification	signal peptide
Ec-03_005130	WD40/YVTN repeat-like-containing domain (493)	Protein binding or modification	signal peptide
Ec-04_000670	Choline transporter-like (591)	Membrane function and transporters	signal peptide
Ec-04_004690	Bromoperoxidase/chloroperoxidase, C-terminal (489)	Cellular regulation and signalling	signal peptide
Ec-04_005870	conserved unknown protein (910)	Unknown	signal peptide
Ec-04_006070	Glycosyltransferase AER61, uncharacterised (740)	Metabolism	signal peptide
Ec-05_000090	Hypothetical protein (71)	Unknown	signal peptide
Ec-05_000360	expressed unknown protein (322)	Unknown	signal peptide
Ec-05_000480	P-loop containing nucleoside triphosphate hydrolase (367)	Metabolism	signal peptide
Ec-05_000530	Hypothetical protein (68)	Unknown	signal peptide
Ec-05_000630	Manganese/iron superoxide dismutase, C-terminal (231)	Redox	signal peptide
Ec-05_001630	Chitin-binding and cellulose-binding domain protein (511)	Cell wall and extracellular	signal peptide
Ec-05_001650	Chitin-binding and cellulose-binding domain protein (454)	Cell wall and extracellular	signal peptide
Ec-05_001660	Chitin-binding and cellulose-binding domain protein (456)	Cell wall and extracellular	signal peptide
Ec-05_001950	Chitin-binding and cellulose-binding domain protein (735)	Cell wall and extracellular	signal peptide
Ec-05_002280	expressed unknown protein (405)	Unknown	signal peptide
Ec-05_003280	hypothetical protein (138)	Unknown	signal peptide
Ec-05_003470	Fibronectin type III (1528)	Cell wall and extracellular	signal peptide
Ec-05_003540	Hypothetical protein (351)	Unknown	signal peptide
Ec-05_003770	Protein kinase-like domain (390)	Cellular regulation and signalling	signal peptide
Ec-05_006630	Likely pseudogene (373)	Unknown	signal peptide
Ec-05_006780	Ammonium transporter (441)	Membrane function and transporters	signal peptide
Ec-06_002480	Xanthine/uracil/vitamin C permease (275)	Membrane function and transporters	signal peptide
Ec-06_003430	Hypothetical leucine rich repeat protein (686)	Cellular regulation and signalling	signal peptide
Ec-06_009450	Formylglycine-dependent sulfatase (611)	Metabolism	signal peptide
Ec-06_010450	FKBP-type peptidyl-prolyl cis-trans isomerase 8 (144)	Protein binding or modification	signal peptide
Ec-07_003850	Pleckstrin homology-like domain (349)	Cellular regulation and signalling	signal peptide
Ec-07_005990	DOMON domain (1688)	Cell wall and extracellular	signal peptide
Ec-08_000010	Hypothetical protein (381)	Unknown	signal peptide
Ec-08_000100	von Willebrand factor, type D domain (963)	Cell wall and extracellular	signal peptide
Ec-08_003140	expressed unknown protein (192)	Unknown	signal peptide
Ec-08_005390	Pectin lyase fold/virulence factor (1025)	Cell wall and extracellular	signal peptide
Ec-08_006060	WSC-domain containing protein (523)	Cell wall and extracellular	signal peptide
Ec-09_001290	similar to TAK1 (TGF-beta-activated kinase) (378)	Cellular regulation and signalling	signal peptide
Ec-09_001580	expressed unknown protein (188)	Unknown	signal peptide
Ec-09_002460	Hypothetical leucine rich repeat protein (593)	Cellular regulation and signalling	signal peptide
Ec-09_003950	Mannuronan C-5-epimerase (846)	Cell wall and extracellular	signal peptide
Ec-09_004400	Hypothetical leucine rich repeat protein (570)	Cellular regulation and signalling	signal peptide
Ec-10_000400	DOMON domain (140)	Cell wall and extracellular	signal peptide
Ec-10_006420	hypothetical protein (426)	Unknown	signal peptide
Ec-11_000670	Endo-1,3-beta-glucanase, family GH81 (1107)	Metabolism	signal peptide
Ec-11_001000	expressed unknown protein (442)	Unknown	signal peptide
Ec-11_001310	expressed unknown protein (234)	Unknown	signal peptide
Ec-11_001390	Hypothetical leucine rich repeat protein (517)	Cellular regulation and signalling	signal peptide
Ec-11_002830	conserved unknown protein (487)	Unknown	signal peptide
Ec-11_002850	conserved unknown protein (755)	Unknown	signal peptide
Ec-11_003810	Aminotransferase (490)	Metabolism	signal peptide
Ec-11_004650	coagulation factor 5/8 type domain protein (529)	Cell wall and extracellular	signal peptide
Ec-11_005180	Mannuronan C-5-epimerase internal fragment (975)	Cell wall and extracellular	signal peptide
Ec-12_000420	RlpA-like double-psi beta-barrel domain (287)	Metabolism	signal peptide
Ec-12_001990	Chitobiase/beta-hexosaminidase C-terminal domain (600)	Metabolism	signal peptide
Ec-12_002830	expressed unknown protein (538)	Unknown	signal peptide
Ec-12_003820	expressed unknown protein (272)	Unknown	signal peptide
Ec-12_009020	hypothetical protein (147)	Unknown	signal peptide
Ec-13_000370	Hypothetical protein (413)	Unknown	signal peptide
Ec-13_000380	Hypothetical protein (457)	Unknown	signal peptide
Ec-13_000770	hypothetical protein (165)	Unknown	signal peptide
Ec-13_000790	hypothetical protein (328)	Unknown	signal peptide
Ec-13_003170	Soluble quinoprotein glucose/sorbosone dehydrogenase (935)	Metabolism	signal peptide
Ec-13_004130	YHYH domain (499)	Transposon or viral gene	signal peptide
Ec-14_004330	Six-bladed beta-propeller, TolB-like (1194)	Unknown	signal peptide
Ec-14_005250	hypothetical protein (1148)	Unknown	signal peptide
Ec-15_000010	Hypothetical protein (95)	Unknown	signal peptide
Ec-15_002990	conserved unknown protein (1176)	Unknown	signal peptide
Ec-16_001580	Hypothetical protein (40)	Unknown	signal peptide
Ec-16_004120	expressed unknown protein (433)	Unknown	signal peptide
Ec-17_002940	Phosphate transporter (474)	Membrane function and transporters	signal peptide
Ec-17_004390	Sodium/solute symporter (422)	Membrane function and transporters	signal peptide
Ec-17_004400	Solute:Sodium symporter family (161)	Membrane function and transporters	signal peptide
Ec-18_001140	Immunoglobulin E-set (542)	Protein binding or modification	signal peptide
Ec-19_000250	Carbohydrate-binding WSC (272)	Cell wall and extracellular	signal peptide
Ec-19_000260	hypothetical protein (262)	Unknown	signal peptide
Ec-19_002200	hypothetical protein (166)	Unknown	signal peptide
Ec-19_003160	Mannuronan C-5-epimerase (553)	Cell wall and extracellular	signal peptide
Ec-19_004010	putative respiratory burst oxidase homolog protein (492)	Metabolism	signal peptide
Ec-19_004380	Notch domain (551)	Cellular regulation and signalling	signal peptide
Ec-19_005210	tropinone reductase, putative / tropine dehydrogenase, putative (308)	Metabolism	signal peptide
Ec-20_002850	hypothetical protein (230)	Unknown	signal peptide
Ec-20_003100	Pectin lyase fold (695)	Cell wall and extracellular	signal peptide
Ec-21_001320	Galactose-binding domain-like (1155)	Metabolism	signal peptide
Ec-21_001360	Pectin lyase fold (1150)	Cell wall and extracellular	signal peptide
Ec-21_002190	Hypothetical protein (208)	Unknown	signal peptide
Ec-21_003160	polymorphic Outer membrane protein G/I family (1435)	Membrane function and transporters	signal peptide
Ec-21_004010	Chitin-binding and cellulose-binding domain protein (469)	Cell wall and extracellular	signal peptide
Ec-22_002180	Leucine-rich repeat (335)	Cellular regulation and signalling	signal peptide
Ec-22_002240	hypothetical protein (292)	Unknown	signal peptide
Ec-22_002870	Coagulation factor 5/8 C-terminal type domain (1107)	Cell wall and extracellular	signal peptide
Ec-22_003930	Carbohydrate-binding WSC (2295)	Cell wall and extracellular	signal peptide
Ec-23_001550	expressed unknown protein (439)	Unknown	signal peptide
Ec-23_002330	Alpha/Beta hydrolase fold (1555)	Metabolism	signal peptide
Ec-23_003290	hypothetical protein (154)	Unknown	signal peptide
Ec-23_003300	Hypothetical protein (67)	Unknown	signal peptide
Ec-24_000110	Zinc carboxypeptidase family protein (766)	Metabolism	signal peptide
Ec-24_003970	Choline transporter-like (363)	Membrane function and transporters	signal peptide
Ec-24_004240	Chitin-binding and cellulose-binding domain protein (467)	Cell wall and extracellular	signal peptide
Ec-25_001080	Pectin lyase fold (650)	Cell wall and extracellular	signal peptide
Ec-25_001090	Pectin lyase fold/virulence factor (614)	Cell wall and extracellular	signal peptide
Ec-25_001730	hypothetical protein (877)	Unknown	signal peptide
Ec-25_003490	Carbohydrate-binding WSC, subgroup (626)	Cell wall and extracellular	signal peptide
Ec-26_000060	Proline-rich, cell wall structural protein (1024)	Cell wall and extracellular	signal peptide
Ec-26_001210	hypothetical protein (169)	Unknown	signal peptide
Ec-26_005250	conserved unknown protein (65)	Unknown	signal peptide
Ec-26_005260	Secreted protein similar to EsV-1-163 (396)	Transposon or viral gene	signal peptide
Ec-26_006670	imm upregulated 9, secreted protein (439)	Unknown	signal peptide
Ec-27_002330	imm upregulated 5, secreted protein (760)	Unknown	signal peptide
Ec-27_006700	Mannuronan C-5-epimerase (493)	Cell wall and extracellular	signal peptide
Ec-28_002130	sexually induced protein 3 (213)	Cytoskeleton and flagella	signal peptide
[truncated: 12 more columns]
