# Supplementary material for: Convergent recruitment of TALE homeodomain life cycle regulators to direct sporophyte development in land plants and brown algae
Source: eLife. 2019 Jan 15;8:e43101. doi: 10.7554/eLife.43101 (PMC6368402; doi:10.7554/eLife.43101)
Supplement: Supplementary file 4. [file elife-43101-supp4.xlsx]

## Sheet: Table S4. GO analysis
Supplementary Table S4. Gene ontology analysis of the gametophyte versus sporophyte differentially regulated genes.
The presence of signal peptides or signal anchors was predicted using Hectar.
The GO terms in bold are also enriched when transcriptomes of the sam and oro mutants were compared with that of the wtSP
GO, gene ontology; DE, differentially expressed; wtGA, wild type gametophyte, wtSP, wild type sporophyte; Nr Test, number of DE genes with that GO term; Nr Ref, number of non-DE genes with that GO term; FDR, false discovery rate; LocusID, gene identifier
Gene Ontology enrichment, Fisher test p<0.05								Gene Ontology enrichment, Fisher test p<0.05								Gene Ontology enrichment, Fisher test p<0.05								Gene Ontology enrichment, Fisher test p<0.05
Genes upregulated in wtGA vs wtpSP, most specific GO terms								Genes downregulated in wtGA vs wtpSP, most specific GO terms								Proteins with a predicted signal peptide, upregulated in wtGA vs wtpSP								Genes with signal peptide, downregulated in wtGA vs wtpSP
GO number	GO term	GO Category	P value	Padj	Nr Test	Nr Ref		GO number	GO term	GO Category	P value	Padj	Nr Test	Nr Ref		GO number	GO term	GO Category	P value	Padj	Nr Test	Nr Ref		GO number	GO term	GO Category	P value	Padj	Nr Test	Nr Ref
GO:0038032	termination of G-protein coupled receptor signaling pathway	BIOLOGICAL_PROCESS	1.64799e-05	0.00033825	11	55		GO:0070588	calcium ion transmembrane transport	BIOLOGICAL_PROCESS	2.06114e-05	0.0002678	5	13		GO:0030248	cellulose binding	MOLECULAR_FUNCTION	2.65979e-06	2.535e-05	7	6		GO:0016901	oxidoreductase activity, acting on the CH-OH group of donors, quinone or similar compound as acceptor	MOLECULAR_FUNCTION	0.000131443	0.0007205	4	4
GO:0015707	nitrite transport	BIOLOGICAL_PROCESS	0.000410751	0.0028085	3	2		GO:0007229	integrin-mediated signaling pathway	BIOLOGICAL_PROCESS	0.000598463	0.00251829	3	6		GO:0019028	viral capsid	CELLULAR_COMPONENT	5.06646e-06	2.535e-05	7	7		GO:0048038	quinone binding	MOLECULAR_FUNCTION	0.000131443	0.0007205	4	4
GO:0015706	nitrate transport	BIOLOGICAL_PROCESS	0.000410751	0.0028085	3	2		GO:0005975	carbohydrate metabolic process	BIOLOGICAL_PROCESS	0.00149034	0.0048425	11	180		GO:0005576	extracellular region	CELLULAR_COMPONENT	0.000313913	0.00104667	7	17		GO:0007229	integrin-mediated signaling pathway	BIOLOGICAL_PROCESS	0.00178798	0.00655594	3	4
GO:0006863	purine nucleobase transport	BIOLOGICAL_PROCESS	0.00123722	0.00461144	2	0		GO:0038032	termination of G-protein coupled receptor signaling pathway	BIOLOGICAL_PROCESS	0.00194186	0.00560444	6	60		GO:0004553	hydrolase activity, hydrolyzing O-glycosyl compounds	MOLECULAR_FUNCTION	0.000575677	0.00144	8	26		GO:0038032	termination of G-protein coupled receptor signaling pathway	BIOLOGICAL_PROCESS	0.0125191	0.0344274	4	20
GO:0055085	transmembrane transport	BIOLOGICAL_PROCESS	0.00142814	0.00487946	26	367		GO:0007264	small GTPase mediated signal transduction	BIOLOGICAL_PROCESS	0.0121631	0.0237714	6	90		GO:0005975	carbohydrate metabolic process	BIOLOGICAL_PROCESS	0.017058	0.0217696	8	49		GO:0042823	pyridoxal phosphate biosynthetic process	BIOLOGICAL_PROCESS	0.039312	0.0406168	1	0
GO:0007018	microtubule-based movement	BIOLOGICAL_PROCESS	0.00461723	0.0135219	9	82		GO:0006471	protein ADP-ribosylation	BIOLOGICAL_PROCESS	0.0199328	0.0293222	1	0		GO:0015707	nitrite transport	BIOLOGICAL_PROCESS	0.0195926	0.0217696	2	2		GO:0006071	glycerol metabolic process	BIOLOGICAL_PROCESS	0.039312	0.0406168	1	0
GO:0043547	positive regulation of GTPase activity	BIOLOGICAL_PROCESS	0.00715556	0.0183361	5	30		GO:0009624	response to nematode	BIOLOGICAL_PROCESS	0.0199328	0.0293222	1	0		GO:0015706	nitrate transport	BIOLOGICAL_PROCESS	0.0195926	0.0217696	2	2		GO:0030154	cell differentiation	BIOLOGICAL_PROCESS	0.0406168	0.0406168	3	17
GO:0006147	guanine catabolic process	BIOLOGICAL_PROCESS	0.03523	0.0390387	1	0		GO:0006357	regulation of transcription from RNA polymerase II promoter	BIOLOGICAL_PROCESS	0.0175833	0.0293222	5	71		GO:0015113	nitrite transmembrane transporter activity	MOLECULAR_FUNCTION	0.0195926	0.0217696	2	2		GO:0004733	pyridoxamine-phosphate oxidase activity	MOLECULAR_FUNCTION	0.039312	0.0406168	1	0
GO:0060179	male mating behavior	BIOLOGICAL_PROCESS	0.03523	0.0390387	1	0		GO:0005576	extracellular region	CELLULAR_COMPONENT	0.00461852	0.012012	5	50		GO:0015112	nitrate transmembrane transporter activity	MOLECULAR_FUNCTION	0.0195926	0.0217696	2	2		GO:0008889	glycerophosphodiester phosphodiesterase activity	MOLECULAR_FUNCTION	0.039312	0.0406168	1	0
GO:0030154	cell differentiation	BIOLOGICAL_PROCESS	0.0300736	0.0390387	6	61		GO:0034704	calcium channel complex	CELLULAR_COMPONENT	0.00776692	0.016835	2	5		GO:0016209	antioxidant activity	MOLECULAR_FUNCTION	0.0379599	0.0379599	4	18		GO:0004634	phosphopyruvate hydratase activity	MOLECULAR_FUNCTION	0.039312	0.0406168	1	0
GO:0005576	extracellular region	CELLULAR_COMPONENT	0.000622294	0.00364314	8	47		GO:0005871	kinesin complex	CELLULAR_COMPONENT	0.0127571	0.0237714	6	91										GO:0000015	phosphopyruvate hydratase complex	CELLULAR_COMPONENT	0.039312	0.0406168	1	0
GO:0019028	viral capsid	CELLULAR_COMPONENT	0.000784714	0.00402312	7	37		GO:0000922	spindle pole	CELLULAR_COMPONENT	0.0394704	0.0395	2	14
GO:0016020	membrane	CELLULAR_COMPONENT	0.00829253	0.0199996	63	1276		GO:0005262	calcium channel activity	MOLECULAR_FUNCTION	7.58388e-06	0.00019708	5	10
GO:0005881	cytoplasmic microtubule	CELLULAR_COMPONENT	0.03523	0.0390387	1	0		GO:0000981	RNA polymerase II transcription factor activity, sequence-specific DNA binding	MOLECULAR_FUNCTION	3.22292e-05	0.000279067	8	55
GO:0030496	midbody	CELLULAR_COMPONENT	0.03523	0.0390387	1	0		GO:0016901	oxidoreductase activity, acting on the CH-OH group of donors, quinone or similar compound as acceptor	MOLECULAR_FUNCTION	6.65992e-05	0.0004329	4	8
GO:0032391	photoreceptor connecting cilium	CELLULAR_COMPONENT	0.03523	0.0390387	1	0		GO:0048038	quinone binding	MOLECULAR_FUNCTION	0.000130534	0.0006812	4	10
GO:0016589	NURF complex	CELLULAR_COMPONENT	0.03523	0.0390387	1	0		GO:0043531	ADP binding	MOLECULAR_FUNCTION	0.000678353	0.00251829	5	31
GO:0030248	cellulose binding	MOLECULAR_FUNCTION	1.43245e-06	5.863e-05	7	11		GO:0030248	cellulose binding	MOLECULAR_FUNCTION	0.00509477	0.0120309	3	15
GO:0015113	nitrite transmembrane transporter activity	MOLECULAR_FUNCTION	0.000410751	0.0028085	3	2		GO:0016757	transferase activity, transferring glycosyl groups	MOLECULAR_FUNCTION	0.0202645	0.0293222	8	162
GO:0015112	nitrate transmembrane transporter activity	MOLECULAR_FUNCTION	0.000410751	0.0028085	3	2		GO:0004553	hydrolase activity, hydrolyzing O-glycosyl compounds	MOLECULAR_FUNCTION	0.0313268	0.0395	4	56
GO:0004553	hydrolase activity, hydrolyzing O-glycosyl compounds	MOLECULAR_FUNCTION	0.00112296	0.00461144	8	52		GO:0003978	UDP-glucose 4-epimerase activity	MOLECULAR_FUNCTION	0.0394705	0.0395	1	1
GO:0005345	purine nucleobase transmembrane transporter activity	MOLECULAR_FUNCTION	0.00123722	0.00461144	2	0		GO:0071949	FAD binding	MOLECULAR_FUNCTION	0.0266735	0.0365006	2	11
GO:0005509	calcium ion binding	MOLECULAR_FUNCTION	0.00234841	0.00740652	17	207		GO:0004525	ribonuclease III activity	MOLECULAR_FUNCTION	0.0394705	0.0395	1	1
GO:0016174	NAD(P)H oxidase activity	MOLECULAR_FUNCTION	0.00708135	0.0183361	2	2		GO:0003777	microtubule motor activity	MOLECULAR_FUNCTION	0.0361129	0.0395	6	117
GO:0008061	chitin binding	MOLECULAR_FUNCTION	0.03523	0.0390387	1	0		GO:0016709	oxidoreductase activity, acting on paired donors, with incorporation or reduction of molecular oxygen, NAD(P)H as one donor, and incorporation of one atom of oxygen	MOLECULAR_FUNCTION	0.0349866	0.0395	2	13
GO:0019003	GDP binding	MOLECULAR_FUNCTION	0.03523	0.0390387	1	0		GO:0008889	glycerophosphodiester phosphodiesterase activity	MOLECULAR_FUNCTION	0.0394705	0.0395	1	1
GO:0008191	metalloendopeptidase inhibitor activity	MOLECULAR_FUNCTION	0.03523	0.0390387	1	0
GO:0031177	phosphopantetheine binding	MOLECULAR_FUNCTION	0.0231041	0.0390387	2	5
GO:0043531	ADP binding	MOLECULAR_FUNCTION	0.0366913	0.039588	4	32
GO:0004181	metallocarboxypeptidase activity	MOLECULAR_FUNCTION	0.0231041	0.0390387	2	5
GO:0008146	sulfotransferase activity	MOLECULAR_FUNCTION	0.0220994	0.0390387	5	41
GO:0046820	4-amino-4-deoxychorismate synthase activity	MOLECULAR_FUNCTION	0.03523	0.0390387	1	0
GO:0008158	hedgehog receptor activity	MOLECULAR_FUNCTION	0.0461812	0.0461812	2	8
GO:0004114	3',5'-cyclic-nucleotide phosphodiesterase activity	MOLECULAR_FUNCTION	0.0168926	0.0364524	2	4
GO:0003777	microtubule motor activity	MOLECULAR_FUNCTION	0.011372	0.025903	10	113
GO:0008484	sulfuric ester hydrolase activity	MOLECULAR_FUNCTION	0.0461812	0.0461812	2	8
GO:0005096	GTPase activator activity	MOLECULAR_FUNCTION	0.0276118	0.0390387	3	16
GO:0003871	5-methyltetrahydropteroyltriglutamate-homocysteine S-methyltransferase activity	MOLECULAR_FUNCTION	0.03523	0.0390387	1	0
GO:0005249	voltage-gated potassium channel activity	MOLECULAR_FUNCTION	0.0461812	0.0461812	2	8
GO:0008892	guanine deaminase activity	MOLECULAR_FUNCTION	0.03523	0.0390387	1	0
GO:0008017	microtubule binding	MOLECULAR_FUNCTION	0.0246384	0.0390387	6	58
