# Supplementary material for: Convergent recruitment of TALE homeodomain life cycle regulators to direct sporophyte development in land plants and brown algae
Source: eLife. 2019 Jan 15;8:e43101. doi: 10.7554/eLife.43101 (PMC6368402; doi:10.7554/eLife.43101)
Supplement: Supplementary file 5. [file elife-43101-supp5.xlsx]

## Sheet: Table S5. KEGG analysis
Supplementary Table S5. Kyoto encyclopaedia of genes and genomes (KEGG) pathway analysis of the gametophyte versus sporophyte differentially regulated genes.
KEGG enrichment was carried out using Kobas 3.0, p-values were corrected using the FDR method.
GO, gene ontology; wtGA, wild type gametophyte, wtSP, wild type sporophyte.
Gene Ontology enrichment, Fisher test p<0.05						Gene Ontology enrichment, Fisher test p<0.05
Genes upregulated in wtGA vs wtSP, most specific GO terms						Genes downregulated in wtGA vs wtSP, most specific GO terms
KEGG pathway	Input number	Background number	P-Value	Padj		KEGG pathway	Input number	Background number	P-Value	Padj
Peroxisome	7	83	6.62676e-07	9.659e-06		Metabolic pathways	13	1243	9.2127e-05	0.00130225
Glycosaminoglycan biosynthesis - heparan sulfate / heparin	4	24	1.58913e-05	0.000150288		ABC transporters	3	45	0.000396372	0.00408158
PI3K-Akt signaling pathway	10	342	2.65209e-05	0.000231248		Glycosaminoglycan biosynthesis - heparan sulfate / heparin	2	24	0.00269348	0.0172898
Purine metabolism	7	176	7.02353e-05	0.000525193		Amino sugar and nucleotide sugar metabolism	2	48	0.00969384	0.0408886
Calcium signaling pathway	6	180	0.000576158	0.00311098		Glutathione metabolism	2	52	0.0112374	0.0449578
MAPK signaling pathway	7	255	0.000625211	0.00329077		Lysine degradation	2	52	0.0112374	0.0449578
cAMP signaling pathway	6	199	0.000955617	0.0046913
ECM-receptor interaction	4	82	0.00128771	0.0059406
ABC transporters	3	45	0.00230853	0.00967787
cGMP-PKG signaling pathway	5	167	0.00260904	0.0106945
Metabolic pathways	15	1243	0.00401565	0.0151059
Phagosome	4	155	0.0114363	0.0348126
Gap junction	3	88	0.0136686	0.040261
