# Supplementary material for: Convergent recruitment of TALE homeodomain life cycle regulators to direct sporophyte development in land plants and brown algae
Source: eLife. 2019 Jan 15;8:e43101. doi: 10.7554/eLife.43101 (PMC6368402; doi:10.7554/eLife.43101)
Supplement: Supplementary file 6. [file elife-43101-supp6.xlsx]

## Sheet: Table S6. TALE HD TFs
Supplementary Table S6. TALE homeodomain transcription factors in brown algae and other stramenopiles.
Addition of the suffix "mod" to a gene name indicates that the original gene model has been modified manually. nd, none detected.
Class	Order	Species	Species code	Gene identifier	LocusID or EST contig or scaffold position	Ectocarpus orthologue	Additional known domains detected (Interproscan)	Database accession N°	Database	Protein sequence	HD domain 1	HD domain 2	HD domain 3
Phaeophyceae	Ectocarpales	Ectocarpus sp.	Esp	ORO	Ec-14_005920		nd	KU746822	NCBI	MTSTACNREQERPPMVGHQDDEQQQPRLDPTTTTQHLQHARDYLATLHGDRAASCSDLEEEAKVFLDSPSTEEQTRRFRLIYQLVRYQIHSHTHNMYAILQEKLAAMARVQATVGNADDDPDVKELTIALVNGRIVDATIRVIERAVEAMRDLNGRNEAGTKAKASSSTSSASSSPASNTPPPESWEQPRKQQQERRKQRREKERPEATPIGRTFDSPSKLPKRSRLPAAAVKEMRTWLDQHWDDPVPTHEEKNSFAIKHDITTKQVENWFINIRMREWRPAMRRALDHAEETGSYAEFSRLLQHTAEGNVFKKFLEERQMGHGSTLVPPPSLQRFIGAQGFAAFAGDGRASKRSR*	KLPKRSRLPAAAVKEMRTWLDQHWDDPVPTHEEKNSFAIKHDITTKQVENWFINIRMREWRPA
Phaeophyceae	Ectocarpales	Ectocarpus sp.	Esp	SAM	Ec-27_006660		nd	KU746823	NCBI	MELHEKGGAVSLPAPVAGNGLATGMAWKVAPTINMLSTAAACVPGAGGGVLTVSDSTSCRNNANLVAREDSLSQAAASLVRNAAEIDAAGGAKAHPAIDAGRVEAEIATLELLNQRDTMLCDDIRAACRLGTTTKPGAGVAGKQSKLSCWATVQGIGVPKKAVVPPPSEALSDGEKNDDPPSLPRPASGSTVGSGSGEGDDQEDGNGDDHETSISRKRVFSKYDEETTSILTEWFLAHKRWPYPASKEKNELAEKTNLTTLQISNWFTNKRKRHWTPVIKKRTRSPRDFFEFCVMNPKDHSLVEKKLPLQQEQQEQQQQQSQQPPQQSPHQSQQQRGIAVVGANSFALPDTAQHGMNNGNGNSSGTQVHHGGGGGSGGTGAPALPSLPYNGQSSRMPFD…	RKRVFSKYDEETTSILTEWFLAHKRWPYPASKEKNELAEKTNLTTLQISNWFTNKRKRHWTPV
Phaeophyceae	Ectocarpales	Ectocarpus sp.	Esp	Ec-04_000450	Ec-04_000450		nd	Ec-04_000450	OrcAE (http://bioinformatics.psb.ugent.be/orcae/overview/EctsiV2)	MDSGSAASSSSSGAMVLPSKASSGEGGGTDSPAAVASSSTASNSSSSGVIEASLCVTTRGAQEQQRQQGPRRVSSPILFMGHQQQPLPYPPDAQVLSFPEPYPHDDSDPLSFFLSSGRGDSDPLGFGLGSVADGTFGGRKATPEELMLFRSHRLLQAEAVGVAIGPLHPSGGANAAYVRKRLGLVSTAVERQLRLKVLEQTNTAVEGVRALGEGAPPAQQQSVINAERRNCHRVLSGVLDEGTATLRELSTTGGGGLGGVSVDMGMGMAFPPSALGSPATESQQLASTWEDAATSSSMNSSSSNSISSSCLTSMQLQQQPQRQQQQQQQQQSILHHMPPGTGRSSVFALTQMRDRPQNHHSQLGMALGSTRMEGAGGMKQQGMGASFGSGGGAVAPPGH…	RKGSRHRLTPQAKEILEGWLANHWLNPYPTEEQKLYLAQNCHITVTQVNNWMMNVRVRRCRTK
Phaeophyceae	Ectocarpales	Scytosiphon dotyi (labelled Scytosiphon dotyo)	Sdo	ULXR-2001726	ULXR-2001726	ORO	nd	ULXR-2001726	onekp	MNTGGEQMPHFYSQHQPPMLAEQPRHHQQEDALTTTQQLQQARDYLATRQSDRADSCSDLEEEAEVFLASPYSSEEEERRFRLIYQLVRYQIHSHTHNMYAILQEKLAAMARVQATVGNAEDDSEVKALTIALVNGRVVDATIRVIERAVEAMRQLNGENKNRRGHAARPSTPSGWERTTKQKQKNKQRPERMASSVIPTRPLGSPALKAPKRSRLPAAAVKEMRTWLDQHWDDPVPSHEEKAGFAYRHDITTKQVENWFINIRMREWRPAMRRALDHAEETGSYAEFSRLLQHTADGNVFKKFLEDREMGRDSTMVPPPSLQRFIGAQGFAAFSVDSRPTKRSR*	KAPKRSRLPAAAVKEMRTWLDQHWDDPVPSHEEKAGFAYRHDITTKQVENWFINIRMREWRPA
Phaeophyceae	Ectocarpales	Scytosiphon lomentaria	Slo	JCXF-2074466	JCXF-2074466	ORO	nd	JCXF-2074466	onekp	MNTGASGEQMRHLYSQHQPPMLAEQPRRDPREDALTTAQQLQQARDYLATLQSDRAESCSDLEEEAKVFLSFAYTEEEERRFRLVYQLVRYQIHSHTHNMYAILQEKLAAMARVQATVGNAEDDSDVKALTIALVNGRIVDATIRVIERALEAMRQLNGEVKNSRGSVSSPSSPSGWESTTKQKQKNKQRKDRTASGVVPARPLGSRALKAVKRSRLPAAAVKEMRTWLDQHWDDPVPSHEEKAGFAYRHDITTKQVENWFINIRMREWRPAMRRALDHAEETGSYAEFSRLLQHTADGNVFKKFLEDREMGRDSTIVPPASLQRFIGAQGFAAFSGDIRPTKRSR*	KAVKRSRLPAAAVKEMRTWLDQHWDDPVPSHEEKAGFAYRHDITTKQVENWFINIRMREWRPA
Phaeophyceae	Ectocarpales	Petalonia fascia	Pfa	VRGZ-2021267	VRGZ-2021267	ORO	nd	VRGZ-2021267	onekp	MNAGAEQMPNFYSQHQPPMLAEQPRHLQQQEDALTTAQQLQQARDYLATLQSDRAESCSDLEEEAKVFLGSQYTEEEERRFRLIYQLVRYQIHSHTHNMYAILQEKLAAMARVQATVGNDENDSEVKALTIALVNGRIVDATIRVIERALEAIRQLNGETNDGRGHAAATPSTPSTWQRTTKQKAKNKQRSERTASSVLPPTRSLGSPALKAPKRSRLPAAAVKEMRTWLDQHWDDPVPSHEEKAGFAYKHDITTKQVENWFINIRMREWRPAMRRALDHAEETGSYAEFSRLLQHTADGNVFKKFLEDREMGRDSTMVPPPSLQRFIGAQGFAAFSADTRPLKRSR*	KAPKRSRLPAAAVKEMRTWLDQHWDDPVPSHEEKAGFAYKHDITTKQVENWFINIRMREWRPA
Phaeophyceae	Ectocarpales	Punctaria latifolia	Pla	ASZK-2009051	ASZK-2009051	ORO	nd	ASZK-2009051	onekp	SSAPRTATRHTPSVDAERTDKLLTCLADFPGPLARWLSLLALALLFFPRXXXXXXAPPMVVNQQQQQQQQQAMTTQQQLQQARDYLTTLQADRAESCADLEQEAEVFRSSPSTEEQERRFRLIYHLVRYQIHIHTHNMYAILQEKLAAMARVQATVGNAEDDPDVKALTIALVNGRIVDATIRVVERALEAMRELNGKNETRGATSAVATVLSGWDKPKQKKKEKRPAAVVARPLGAPANKPPKRSRLPAAAVKEMRTWLDEHWDDPVPTHEEKAGFAKRHDITTKQVENWFINIRMREWRPAMRRALDHAEETGSYAEFSRLLQHTADGNVFKKFLEEREMGRCSALVPPPSLQRFIGAQGFAAFSGDRPTKRPR*	KPPKRSRLPAAAVKEMRTWLDEHWDDPVPTHEEKAGFAKRHDITTKQVENWFINIRMREWRPA
Phaeophyceae	Ectocarpales	Colpomenia sinuosa	Csi	QLMZ-2080353	QLMZ-2080353	ORO	nd	QLMZ-2080353	onekp	MDTGGEEMPHFYSAHQPPMLAEQPLRRPQEDALTTTQQLQQAREYLVTLQGDRADSCLDLEEEAKVFLNSSYTDEEERRFRLIHQLVRYQIHSHTHNMHAILQEKLAAMARVQATVGNAEDDSEVKALTIALVNGRIVDATIRVLERALEAMRELNGNSNSGRGNAASSSAPSGWERTAKQKQRSKSRQEKGGSSVVPTRPLGSPALKAAKRSRLPAAAVKEMRTWLDRHWDDPVPSHEEKAGFAGRHDITTKQVENWFINIRMREWRPAMRRALDHAEETGSYAEFSRLLQHTADGNVFKKFLEDREMGRDPSVVPPPSLQRFIGAQGFAAFAPDSRPSKRSR*	KAAKRSRLPAAAVKEMRTWLDRHWDDPVPSHEEKAGFAGRHDITTKQVENWFINIRMREWRPA
Phaeophyceae	Ectocarpales	Cladosiphon okamuranus	Cok	s017_4976	Cok_S_s017_4976.t2	ORO	nd	Cok_S_s017_4976.t2	OIST (http://marinegenomics.oist.jp/algae/viewer/info?project_id=53)	MEMRSMSSSAPPMVIDQQQQQQQEKQAMTTKQQLQQARDYLTTLHADREESCSDLEEEAKVFRSSPCTDEQERRFRLIYQLVRYQIHIHTHNMYAILQEKLAAMARVQATVGNAEDDPDVKELTIALVNGRIVDATIRVIERAIEAMRELNGRNQTRGASSAPIKAVLSGWDKPKKKKGKRPAAVAARPVSSPAKKSPKRSRLPAAAVKEMRTWLDEHWDDPVPTHEEKAGFAQRHEITTKQVENWFINIRMREWRPAMRRALDHAEETGSYAEFSRLLQHTADGNVFKKFLEEREMGRSSALVPPPSLQRFIGAQGFAAFSGDRPSQRTR	KSPKRSRLPAAAVKEMRTWLDEHWDDPVPTHEEKAGFAQRHEITTKQVENWFINIRMREWRPA
Phaeophyceae	Laminariales	Saccharina latissima	Sla	4660	Slat_contig_4660	ORO	nd	Slat_contig_4660	Saccharina latissima RNASeq 454 assembly (SBR)	CHSGMGAVMKEPCPPSAWEQSKKEQEPTPPCVPTDPSGQKPAKRSRLPAAAVKEMRTWLDQHWDDPVPTHEEKAGFAQRHDITTKQVENWFINIRMREWRPAMRRALDHAEETGSYAEFSRLLQHTADGNVFKKFLEEREMGHGSALV	KPAKRSRLPAAAVKEMRTWLDQHWDDPVPTHEEKAGFAQRHDITTKQVENWFINIRMREWRPA
Phaeophyceae	Laminariales	Undaria pinnatifida	Upi	FIDQ-2014738	FIDQ-2014738	ORO	nd	FIDQ-2014738	onekp	MDVDVPAGSRPALGALPPGKMMVSTGDIRPDSALAPIAKAAAPAGPPATTQLQTSNYMMVPPAPSTSDSMATKDQLVQAQEYLGTLRSDRAESCRELEEEAKVFLDSPSTPEQERRFRLIYQLLRYQIHTHTHSMYSILQEKLAAMARVQAMVGSGEDDPDVKALTIALVNGRIVDATIRVVERALEAMRELNGTGAVVKEPCTPSAWENSKKEQEPAPPCGPTHPSGQKPAKRSRLPAAAVKEMRTWLDQHWDDPVPTHEEKAGFAQRHDITTKQVENWFINIRMREWRPAMRRALDHAEETGSYAEFSRLLQHTADGNVFKKFLEEREMGHGSALVPPPSLQRFIGAEGFAAFVGERSNKRMR*	KPAKRSRLPAAAVKEMRTWLDQHWDDPVPTHEEKAGFAQRHDITTKQVENWFINIRMREWRPA
Phaeophyceae	Laminariales	Kjellmaniella crassifolia	Kcr	RAPY-2013466	RAPY-2013466	ORO	nd	RAPY-2013466	onekp	MDVDVPPGSRAALGALPPGNMMVPTGERGTAVDIRPADSAPTLAKGLLPAAPPAATQTGEIMVPPGPSTSDSMATKDQLVQAQEYLGTLRSDRAESCRELEEEAKVFLDSPSTPEQERRFRLIYQLLRYQIHTHTHSMYSILQEKLAAMARVQAMVGGGEDDPDVKALTIALVNGRIVDATIRVVERALEAMRELNGTSAVVKEPCPPSAWEQSKKEQEPAPPCGPTDPSGQKPAKRSRLPAAAVKEMRTWLDQHWDDPVPTHEEKAGFAQRHDITTKQVENWFINIRMREWRPAMRRALDHAEETGSYAEFSRLLQHTADGNVFKKFLEEREMGHGSALVPPPSLQRFIGAEGFAAFVGERSNKRMR*	KPAKRSRLPAAAVKEMRTWLDQHWDDPVPTHEEKAGFAQRHDITTKQVENWFINIRMREWRPA
Phaeophyceae	Laminariales	Saccharina japonica	Sja	SJ07622	scaffold208:356284..358397;358398..358523, 359631..359699, 360630..360704, 361073..361163, 363452..363649, 364624..364712, 365326..365394, 371708..372021, 372389..372464;372465..372496(-)	ORO	nd	SJ07622	Sjap genome v6.1	MDVDVPPGSRAALEALPPGNMMVPTGDRGTGVDIRPADSAPTLAKGLLPAAPPAATQTGEIMVPPGPSTSDSMATKDQLVQAQEYLGTLRSDRAESCRELEEEAKVFLDSPSTPEQERRFRLIYQLLRYQIHTHTHSMYSILQEKLAAMARVQAMVGGGEDDPDVKALTIALVNGRIVDATIRVVERALEAMRELNGTSAVVKEPCPPSAWEQSKKEQEPAPSCGPTDPPGQKPAKRSRLPAAAVKEMRTWLDQHWDDPVPTHEEKAAFAQRHDITTKQVENWFINIRMREWRPAMRRALDHAEETGSYAEFSRLLQHTADGNVFKKFLEEREMGHGSALVPPPSLQRFIGAEGFAAFVGERSNKRMR*	KPAKRSRLPAAAVKEMRTWLDQHWDDPVPTHEEKAGFAQRHDITTKQVENWFINIRMREWRPA
Phaeophyceae	Fucales	Sargassum integerrimum	Sin	FOMH-2016800	FOMH-2016800	ORO	nd	FOMH-2016800	onekp	MDSMAMPTGSPVPVMDMYNEGPATSTTAVVAPTSGDTMTTRDQLLQAEEYLNSLRTDRAQMCIELEQEAQRFLDSNHSSEQDRRFRLIYQLVRYQIHTYTHSMYSILQEKLEAMARVQAMVGSAEDDPDIKALTIALVNGRIVDATIRVIERAIEAMRELNGRSDSLSKKDGSGSLTWRSDDKKSQSSSDDMSKRKATKRSRLPAAAVKEMRTWLDRHWDDPVPTHEEKTGFAERHGITTKQVENWFINIRMREWRPAMRRALDHAEETGSYAEFSRLLQHTADGNVFKKFLEEREQGKGGGLVPPPSLQRFIGADSFAAFVGDKRDMGKKRMC*	KATKRSRLPAAAVKEMRTWLDRHWDDPVPTHEEKTGFAERHGITTKQVENWFINIRMREWRPA
Phaeophyceae	Fucales	Sargassum horneri	Sho	RWXW-2074915	RWXW-2074915	ORO	nd	RWXW-2074915	onekp	MDSMAMPTGSPVPVMDMYNEGPATSTTAVVAPTSGDTMTTRDQLLQAEEYLNSLRTDRAQMCIELEQEAQRFLDSNHSAEQDRRFRLIYQLVRYQIHTYTHSMYSILQEKLEAMARVQAMVGSAEDDPDIKALTIALVNGRIVDATIRVIERAIEAMRELNGRSDTLSKKDASGSLTWRSDDKQSQSSSDDMSKRKATKRSRLPAAAVKEMRTWLDRHWDDPVPTHEEKTGFAERHGITTKQVENWFINIRMREWRPAMRRALDHAEETGSYAEFSRLLQHTADGNVFKKFLEEREQGKGGGLVPPPSLQRFIGADSFAAFVGDKRDMGKKRLC*	KATKRSRLPAAAVKEMRTWLDRHWDDPVPTHEEKTGFAERHGITTKQVENWFINIRMREWRPA
Phaeophyceae	Fucales	Sargassum hemiphyllum	She	VYER-2086459	VYER-2086459	ORO	nd	VYER-2086459	onekp	MDSMAMPTGSPVPVMDMYNEGPAPSTTAVVAPTSGDTMTTRDQLLQAEEYLNSLRTDRAQMCIELEQEAQRFLDSNHSAEQDRRFRLIYQLVRYQIHTYTHSMYSILQEKLEAMARVQAMVGSAEDDPDIKALTIALVNGRIVDATIRVIERAIEAMRELNGRSDTLSKKDASGSLTWRSDDKQSQSSSDDMSKRKATKRSRLPAAAVKEMRTWLDRHWDDPVPTHEEKTGFAERHGITTKQVENWFINIRMREWRPAMRRALDHAEETGSYAEFSRLLQHTADGNVFKKFLEEREQGKGGGLVPPPSLQRFIGADSFAAFVGDKRDMGKKRMC*	KATKRSRLPAAAVKEMRTWLDRHWDDPVPTHEEKTGFAERHGITTKQVENWFINIRMREWRPA
Phaeophyceae	Fucales	Sargassum henslowianum	She	FIKG-2077121	FIKG-2077121	ORO	nd	FIKG-2077121	onekp	MDSMAMPTGSPVPVMDMYNEGPAPSTTAVVAPTSGDTMTTRDQLLQAEEYLNSLRTDRAQMCIELEQEAQRFLDSNHSSEQDRRFRLIYQLVRYQIHTYTHSMYSILQEKLEAMARVQAMVGSAEDDPDIKALTIALVNGRIVDATIRVIERAIEAMRELNGRSDTFSKKDGSGSLTWRSDDKKSQSSSDDMSKRKATKRSRLPAAAVKEMRTWLDRHWDDPVPTHEEKTGFAERHGITTKQVENWFINIRMREWRPAMRRALDHAEETGSYAEFSRLLQHTADGNVFKKFLEEREQGKGGGLVPPPSLQRFIGADSFAAFVGDKRDMGKKRMC*	RATKRSRLPAAAVKEMRTWLDRHWDDPVPTHEEKTGFAERHGITTKQVENWFINIRMREWRPA
Phaeophyceae	Fucales	Sargassum vachellianum	Sva	HFIK-2069294	HFIK-2069294	ORO	nd	HFIK-2069294	onekp	MDSMAMPTGSPVPVMDMYNEGPAPSTTAVVAPTSGDTMTTRDQLLQAEEYLNSLRTDRAQMCIELEQEAQRFLDSNHSSEQDRRFRLIYQLVRYQIHTYTHSMYSILQEKLEAMARVQAMVGSAEDDPDIKALTIALVNGRIVDATIRVIERAIEAMRELNGRSDTFSKKDGSGSLTWRSDDKKSQSSSDDMSKRKATKRSRLPAAAVKEMRTWLDRHWDDPVPTHEEKTGFAERHGITTKQVENWFINIRMREWRPAMRRALDHAEETGSYAEFSRLLQHTADGNVFKKFLEEREQGKGGGLVPPPSLQRFIGADSFAAFVGDKRDMGKKRMC*	KATKRSRLPAAAVKEMRTWLDRHWDDPVPTHEEKTGFAERHGITTKQVENWFINIRMREWRPA
Phaeophyceae	Fucales	Sargassum muticum	Smu	JGGD-2080534	JGGD-2080534	ORO	nd	JGGD-2080534	onekp	MDSMAMPTGSPVPVMDMYNEGPATSTTAVVAPTSGDTMTTRDQLLQAEEYLNSLRTDRAQMCIELEQEAQRFLDSNHSAEQDRRFRLIYQLVRYQIHTYTHTMYSILQEKLEAMARVQAMVGSAEDDPDIKALTIALVNGRIVDATIRVIERAIEAMRELNGRSDTLSKKDASGSLTWRSDDKQSQSSSDDMSKRKATKRSRLPAAAVKEMRTWLDRHWDDPVPTHEEKTGFAERHGITTKQVENWFINIRMREWRPAMRRALDHAEETGSYAEFSRLLQHTADGNVFKKFLEEREQGKGGGLVPPPSLQRFIGADSFAAFVGDKRDMGKKRMC*	RKAKRSRLPAAAVKEMRTWLDRHWDDPVPTHEEKTGFAERHGITTKQVENWFINIRMREWRPA
Phaeophyceae	Fucales	Sargassum thunbergii	Sth	YRMA-2105997	YRMA-2105997	ORO	nd	YRMA-2105997	onekp	MDSMAMPTGSPVPVMDMYNEGPATSTTAVVAPTSGDTMTTRDQLLQAEEYLNSLRTDRAQMCIELEQEAQRFLDSNHSAEQDRRFRLIYQLVRYQIHTYTHSMYSILQEKLEAMARVQAMVGSAEDDPDIKALTIALVNGRIVDATIRVIERAIEAMRELTGRSDTLSKKDASGSLTWRSDDKQSQSSSDDMSKRKATKRSRLPAAAVKEMRTWLDRHWDDPVPTHEEKTGFAERHGITTKQVENWFINIRMREWRPAMRRALDHAEETGSYAEFSRLLQHTADGNVFKKFLEEREQGKGGGLVPPPSLQRFIGADSFAAFVGDKRDMGKKRMC*	KATKRSRLPAAAVKEMRTWLDRHWDDPVPTHEEKTGFAERHGITTKQVENWFINIRMREWRPA
Phaeophyceae	Fucales	Hizikia fusiformis	Hfu	LDRY-2116478	LDRY-2116478	ORO	nd	LDRY-2116478	onekp	MDSMAMPTGSPVPVMDMYNESPATSTTAVVAPTSGDTMTTRDQLLQAEEYLNSLRTDRAQMCVELEQEAQRFLDSNHSAEQDRRFRLIYQLVRYQIHTYTHSMYSILQEKLEAMARVQAMVGSAEDDPDIKALTIALVNGRIVDATIRVIERATEAMRELNGRSDTLSKKDAPGSLTWRSDDKQSQSSSDDMSKRKATKRSRLPAAAVKEMRTWLDRHWDDPVPTHEEKTGFAERHGITTKQVENWFINIRMREWRPAMRRALDHAEETGSYAEFSRLLQHTADGNVFKKFLEEREQGKGGGLVPPPSLQRFIGADSFAAFVGDKRDMGKKRMC*	KATKRSRLPAAAVKEMRTWLDRHWDDPVPTHEEKTGFAERHGITTKQVENWFINIRMREWRPA
Phaeophyceae	Ishigeales	Ishige okamurai	Iok	APTP-2015225	APTP-2015225	ORO	nd	APTP-2015225	onekp	MTTEGGPKPTAGESPVIPSTVDDASISSDKLLACAAVKCVSQPKTDIRDTERSADRAPSVSDEPSGKESRDAAQSGDVSKGRPTSTTMISANEKSTANLLEQAEAKLKALHEERNDICTELEAQANAFVASPSTPERERRFRLIYQLLRFQIHSHLHTMHSILQEKLTAMDAVHEVVGHEEDTGVRDLTIALAKCRMVDSTIRLVERGLEAMCTLNGCSLPARQGNNGSKSNNAEFSSSSTPTTHTKSELELSVKPKCKISKRSRLPAAAVKEMRTWLDKHWDDPVPTHDEKVGFARRHGITTKQVENWFINIRMREWRPAMRRALDHAEETGSYAEFTRLLQHTAEGNVFKKFLEEREAGHSTTLVPPPSLQRFIGPEGFVAFLGNERPQKRQR*	KISKRSRLPAAAVKEMRTWLDKHWDDPVPTHDEKVGFARRHGITTKQVENWFINIRMREWRPA
Phaeophyceae	Desmarestiales	Desmarestia viridis	Dvi	FSQE-2045478	FSQE-2045478	ORO	nd	FSQE-2045478	onekp	VKEMRTWLDRHWDDPVPTHEEKAGFALRHDISTKQVENWFINIRMREWRPAMRRALDHAEETGSYAEFSRLLQHTADGNVFKKFLEERELGHGSSLVPPPSLQRFIGAEGFAAFVGERSNKRQR*	VKEMRTWLDRHWDDPVPTHEEKAGFALRHDISTKQVENWFINIRMREWRPA
Phaeophyceae	Dictyotales	Dictyopteris undulata	Dun	LIRF-2009250	LIRF-2009250	ORO	nd	LIRF-2009250	onekp	MEAGYSVDTFNTSPVEVTTERAEGPARFLDSSSSRIVAAPTLKEQLREAEVYLETLQADRAEICRELEEEAKFFLESSSAPEQEKRFKLIYQLVRFHIHTQSHNRYSVMQEKVACLERVQEALDGCVDDAAFELADARDLMIAVSKGKIVDSTIRVTQRGLEAMRELNGRGGAPRNTYNSSASSGSKHAKEDSDAEKTSDTKVVKRSRLPASAVKEMRTWLDRHWDDPVPTHDEKLGFARGHSITTKQVENWFINVRMREWRPAMRRALDHAEKTGSYAEFSRLLQHTADGNVFKKFLEEREQGKNTTLVPPPSLQRFITVEGFAAFCGGDKPQKRYRSISQ*	KVVKRSRLPASAVKEMRTWLDRHWDDPVPTHDEKLGFARGHSITTKQVENWFINVRMREWRPA
Phaeophyceae	Ectocarpales	Scytosiphon lomentaria	Slo	SAM	scaffold57046RC_100N_scaffold26538:1868..1949, 3424..3708, 3842..3938, 4591..4713, 5253..5337, 6931..6994, 7098..7334, 7532..7619, 8273..8441, 9154..10093, 10297..10526+)	SAM	nd	This study	This study	AAASLVQNTPEADTNAATSKGTGKRHPVIDSGRVEAEIATLELLNQRDTMLCDDLRAACRLGTGANKQPGSRPSCWALVQVHGVSRKECASSSSPSPRVGVNRHAPPGELARRKSNGGNTSPHADADADAAGSGDEEGGEGEDDSPGSQKRVFSKYDEETTSILTEWFLSHKRWPYPAAKEKNALAEMTNLTTLQISNWFTNKRKRHWTPVIKKRTRSPRDFFEFCVMNPKDQSATNRQQQQQQQLSTNMNNTGGGNNVSNNVGNSGMPMHHGGGTRALASTTNNDGLPTSAISFDGRTGTTTSATTGAGAFWQDPSRQQQQQQLGPQHPGALAPGLVYASKAARQAANLDPSNSQHPQPAWMTPSVGVERRGHSMAYPHDGGRNAHQGGPPQQQPAAD…	QKRVFSKYDEETTSILTEWFLSHKRWPYPAAKEKNALAEMTNLTTLQISNWFTNKRKRHWTPV
Phaeophyceae	Ectocarpales	Punctaria latifolia	Pla	ASZK-2019646	ASZK-2019646	SAM	nd	ASZK-2019646	onekp	SCSNASLRAREESLSQAAMSLVRNAPQKDATAGGGKANPVIDAARVEAEISTLELLNQRDTMLCDNLRASTRIGAAAKISGAGGGGLLHQNNKPSCWTLVNGVGVPKQAFSSSVSANPSEAQLRHHEKAGQSRRDNGGVGGGGGDGRSGSGDDEGNSTEGSSDARKRVFSKYDEETTSLLTEWFLAHKRWPYPAAKEKDALAEATKLTTLQISNWFTNKRKRHWTPVIKKRTRSPRDFFEFCVMNPKEQTVAGKKRMQSQQMQQQQHVLPRHQHQHHQHHPQQQQKMTMGGLKSNSYSPGDASQRGMDPNNGMPHHQQMPPVSGMHHGSPRNAPLVGHKPVLKADANGAPSMPFVPRSSGSVDGPPGKRATMPGTANEGAWIDRSRQQQPPPPLPPXSS…	RKRVFSKYDEETTSLLTEWFLAHKRWPYPAAKEKDALAEATKLTTLQISNWFTNKRKRHWTPV
Phaeophyceae	Ectocarpales	Petalonia fascia	Pfa	VRGZ-2081091	VRGZ-2081091	SAM	nd	VRGZ-2081091	onekp	ILTEWFLSHKRWPYPAAKEKNALAKMTNLTTLQISNWFTNKPKRHWTPVIKKRTRSPRDFFEFSVMNPKDQSLTNKNQLQKQRQAPQASSQQTTMGLGGNPYAVSTTAQLGMDNSNNGNSKGGNTVSNNTGMTMHHANGPRNLAPTTHNDGLST	ILTEWFLSHKRWPYPAAKEKNALAKMTNLTTLQISNWFTNKPKRHWTPV
Phaeophyceae	Ectocarpales	Cladosiphon okamuranus	Cok	s018_5094mod	Cok_S_s018_5094.t2	SAM	TAZ-type zinc finger (744 - 847); WD40/YVTN repeat-like-containing domain (848 - 915)	Cok_S_s018_5094.t2	OIST (http://marinegenomics.oist.jp/algae/viewer/info?project_id=53)	MELHGHEAGAVQMKPAAADAAGVLTGFAFKAPTLKKLSSDASAVPGAGGVLTVSDGISCTNASLRAREEALSQAAGSLVRHAPDKGEDASGGIRVNPAVNAARVEAEISTLELLNQRDTMLCDDLRASCRIGAPAATTNGGAGGGLNLRNSNSNSNSNKPSCWALVEGVGVPKQTLFSSSESCPTGAQLRGHEKERGGQGRLPRNASGPMDDDESGAMDDGEDPASRKRVFSKYDEETTSILTEWFLAHKRWPYPAAKEKDALAEATKLTTLQISNWFTNKRKRHWTPVIKKRTRSPRDFFEFCVMNPKEQTLTGKNLQSQQQMKQHHQPQQQHHQQQQHQQQHQQQPSMPMGGTNSTSYATGEMAQRGMGPNTDTGMHHHQQHQQMPSAPGMHHGASR…	RKRVFSKYDEETTSILTEWFLAHKRWPYPAAKEKDALAEATKLTTLQISNWFTNKRKRHWTPV
Phaeophyceae	Laminariales	Saccharina japonica	Sja	SJ10977mod	scaffold3:665701..668082; 668083..669375, 671409..671577, 671991..672538, 673550..673634, 674356..674478, 676897..677221, 684421..684511, 686845..686967, 687293..687391; 687392..687771, 696244..696481(-)	SAM	nd	SJ10977 modified	Sjap genome v6.1	MTLSKQGTGAERAEPGPPEPSPELFRGVPPVSKALAKLVLACLPEVKDAGVLTVSIDEYCTNANLIEREASLSQAASSLGRYVSGKGDAANRDSEGAKATSTAVESDKGGSTIEVEIATLERLNQEDTRLCDELRASCRIGNNTRGGGVQQGKLSCWALVQGGGVSKRAFSSSTAKALIDGAVSGRRQSTGTGSGDDDSGGSNPGSRKRVFSKYDEETTSILTEWFLSHKRWPYPAAKEKDALAEATNLTTLQISNWFTNKRKRHWTPVIKKRTRSPRDFFEFCVMNPKDHAVNNVRPHSHQPPQRAGVAVGADSNPYTLAAMAQRGGINGLHVPVVGDMRQMAGAVHPGAARGFATPSGLPGISFDGLPTAPVDGAHNTVVMPGGAGGGGGWVRTAAG…	RKRVFSKYDEETTSILTEWFLSHKRWPYPAAKEKDALAEATNLTTLQISNWFTNKRKRHWTPV
Phaeophyceae	Laminariales	Kjellmaniella crassifolia	Kcr	RAPY-2085028	RAPY-2085028	SAM	nd	RAPY-2085028	onekp	MTLSKQGTGAERAEPGPPEPSPELFRGVPPVSKALAKLVLACLPEAKDAGVLTVSSDESCTNANLIEREASLSQAASSLGRYVSGKGDPANRDSEGGKATSTAAESEKGGSTIEVEIATLERLNQEDTRLCDELRASCRIGNNTRGGGVQQGKLSCWALVQGGGISKRAFSPSTAKALIDGAVSGRRQSTGTGSGDEDSGGSNPGSRKRVFSKYDEETTSILTEWFLSHKRWPYPAAKEKDALAEATNLTTLQISNWFTNKRKRHWTPVIKKRTRSPRDFFEFCVMNPKDHAVNNVRPHSHQPPQRAGVAVGADSNPYTLAAMAPRGG	RKRVFSKYDEETTSILTEWFLSHKRWPYPAAKEKDALAEATNLTTLQISNWFTNKRKRHWTPV
Phaeophyceae	Laminariales	Undaria pinnatifida	Upi	FIDQ-2006107	FIDQ-2006107	SAM	nd	FIDQ-2006107	onekp	EGIKARRTGDEKGGSTIEVEIATLERLNQEDTRLCDELRASCRIGNNTRGGGXXXXXXXXXXXXXXXXKRAFSSSTAKALIDGAVSGRRQNTGAGSGDDDSGGSNPGSRKRVFSKYDEETTSILTEWFLSHKRWPYPAAKEKDALAEATNLTTLQISNWFTNKRKRHWTPVIKKRTRSPRDFFEFCVMNPKDHAVNNVRPHPHQPPQQPGLAVGADSNSYALAAMAQRGMNGLHVPVAADMRQMAGAVHPGPAXSRRPAITASRAWASTACPLARWMERITVVSCRGAVRVAAEGGCAQPRAWTRRALTLAPSGGWTIPGSSSSSSSSNNSSNNNNNNRDRSRRASTLARLLPA	RKRVFSKYDEETTSILTEWFLSHKRWPYPAAKEKDALAEATNLTTLQISNWFTNKRKRHWTPV
Phaeophyceae	Fucales	Sargassum horneri	Sho	RWXW-2011428	RWXW-2011428	SAM	nd	RWXW-2011428	onekp	MTLRKQGTAAARKDPGAGLGIEHLGGPTRVATTLGKVRSPTMLSQDGTAAGVLTVSGDASFTNENLIARETMLSQSASHLERRDPLKEDSLRRYGDGINRQGSGAENGGSTIDAEIATLERLNNQDSQLCDELRASCTIGISNRNAKTSGGQQVARSCWSLVQGALPKGPFSGTTSPRSAEKGAKAGGKGDGDREGGESNSAKKRVFSKYDEETTSILTEWFLSHKRWPYPAAKEKDALAEATNLTTLQISNWFTNKRKRHWTPVIKKRTRSPRDFFEFCVMNPKEHSLVEKRDGKESKEHLKTAGRPPQLTDDGSGVRNSAYAASSGAGAGIGNPQGSIGGLPSVSGSSQAADQRGYSTSVHNGAQAVGFDGRVTDSSVETASANGIPVGSGWVHGAG…	KKRVFSKYDEETTSILTEWFLSHKRWPYPAAKEKDALAEATNLTTLQISNWFTNKRKRHWTPV
Phaeophyceae	Fucales	Sargassum vachellianum	Sva	HFIK-2011484	HFIK-2011484	SAM	nd	HFIK-2011484	onekp	GGKGEGDREGGESNSAKKRVFSKYDEETTSILTEWFLSHKRWPYPAAKEKDALAEATNLTTLQISNWFTNKRKRHWTPVIKKRTRSPRDFFEFCVMNPKEHSLVEKRDGKEIKEHIKTGSRSQQLTDDNSGVRNSAYAASSATSGGVSNPQGGLSSVSGSSQAADQRGYPTSVHNGTQAVGFDGRVPDSSVETASTNGIPVGSGWVHGAGGADTRSGGGGSIALLDHPRPSPSQQQQQQGGPQHPGTLAPGLVYASTAARQAANIDAPLSHHQMAPWMTPPSGVDRRSQHSSYSEMGRRASQPGPLPTSPAPLHLEDPRDDPRLRGYHPQYDIRGFDPNAPVPYQHVQQGQEAYRRDEASGSSLQSQQLQSYTQQQQQQQQLLQQQQSQLQSQRSANPG…	KKRVFSKYDEETTSILTEWFLSHKRWPYPAAKEKDALAEATNLTTLQISNWFTNKRKRHWTPV
Phaeophyceae	Fucales	Sargassum henslowianum	She	FIKG-2013690	FIKG-2013690	SAM	nd	FIKG-2013690	onekp	MTLRKQGTAAARKDPGAGLGIEHLGGPTRVATTLGKVRSPTMLSQDGTAAGVLTVSGDASFTNDNLIARETMLSQSASQLERRDSLKEDPLRRYGDVLSRQGSGAENGGSTIDAEIATLERLNQQDSQLCDELRASCTIGSSNRNTKTSGGQQVARSCWSLVQGALPKGPFSGTISPRSAEKGAKAGGKGEGDREGGESNSAKKRVFSKYDEETTSILTEWFLSHKRWPYPAAKEKDALAEATNLTTLQISNWFTNKRKRHWTPVIKKRTRSPRDFFEFCVMNPKEHSLMEKRDGKEIKEHIKTGSRSQQLTDDNSGVRNSAYAASSATSGGVSNPQGGLSSVSGSSQAADQRGYPTSVHNGTQAVGFDGRVPDSSVETASTNGIPVGSGWVHGAGGAD…	KKRVFSKYDEETTSILTEWFLSHKRWPYPAAKEKDALAEATNLTTLQISNWFTNKRKRHWTPV
Phaeophyceae	Fucales	Sargassum muticum	Smu	JGGD-2007615	JGGD-2007615	SAM	nd	JGGD-2007615	onekp	MTLRKQGTAAARKDPGAGLGIEHLGGPTRVATTLGKVRSPTMLSQDGTAAGVLTVSGDASFTNENLIARETMLSQSASQLERRDPLKEDPLRRYGDGLSRQGSGAENGGSTIDAEIATLERLNQQDSQLCDELRTACTIGNPNRNTKPSTGQQVARSCWSLVQGALPKGPFSGTTSPRSAEKGAKAGGKGDGDREGGESSSAKKRVFSKYDEETTSILTEWFLSHKRWPYPAAKEKDALAEATNLTTLQISNWFTNKRKRHWTPVIKKRTRSPRDFFEFCVMNPKEHSLVEKRDGKESKEHLKTGGRPPQLTDASSGVRNSAYAASSATGAGIGNSHGSVGALSTVSASNQAADQRGYPTSVHNGAQAVGFDGRVADASVETGSTNGVPVGSGWVHGAG…	KKRVFSKYDEETTSILTEWFLSHKRWPYPAAKEKDALAEATNLTTLQISNWFTNKRKRHWTPV
Phaeophyceae	Fucales	Sargassum thunbergii	Sth	YRMA-2020030	YRMA-2020030	SAM	nd	YRMA-2020030	onekp	MTLRKQGTAAARKDPGAGLGIEHLGGPTRVATTLGKVRSPTMLSQDGTAAGVLTVSGDASFTNENLIVRETMLSQSASQLERRDPLKEDPLRRYGDGISRQGSGAENGGSTIDAEIATLERLNQQDSQLCDELRTSCTIGNQNRNTKTSGGQQVARSCWSLVQGALPKGPFSGTTSPRSAEKGAKAGGKGDGDREGGESSSAKKRVFSKYDEETTSILTEWFLSHKRWPYPAAKEKDALAEATNLTTLQISNWFTNKRKRHWTPVIKKRTRSPRDFFEFCVMNPKEHSLVEKRDGKESKEHIKTGGRPPQLTDASSGVRNSAYAASSTTGAGIGNSQGSVGGLSLVSASNQAADQRGYPTSVHNGAQAVGFDGRVADSSVETGSTNGVPVGSGWVHGAG…	KKRVFSKYDEETTSILTEWFLSHKRWPYPAAKEKDALAEATNLTTLQISNWFTNKRKRHWTPV
Phaeophyceae	Fucales	Sargassum hemiphyllum	She	VYER-2008208	VYER-2008208	SAM	nd	VYER-2008208	onekp	MTLRKQGTAAARKDPGAGLGIEHLGGPTRVATTLGKVRSPTMLSQDGTAAGVLTVSGDASFTNENLIARETMLSQSASQLERRDPLKEDPLRRYGDGINRHGSGAENGGSTIDAEIATLERLNQQDSQLCDELRTSCTIGNSNRNTKTSGGQQVARSCWSLVQGALPKGPFSGTTSPRSAEKGAKAGGKGDGDREGGESSSAKKRVFSKYDEETTSILTEWFLSHKRWPYPAAKEKDALAEATNLTTLQISNWFTNKRKRHWTPVIKKRTRSPRDFFEFCVMNPKEHSLVEKRDGKESKEHLKTGGRPPQLTDASSGVRNSAYAASSATGAGIGNPQGSVGGLSTVSASNQAADQRGYPTSVHNGAQAVGFDGRVADSSVETGSANGVPVGSGWVHGAG…	KKRVFSKYDEETTSILTEWFLSHKRWPYPAAKEKDALAEATNLTTLQISNWFTNKRKRHWTPV
Phaeophyceae	Fucales	Sargassum integerrimum	Sin	FOMH-2002928	FOMH-2002928	SAM	nd	FOMH-2002928	onekp	MTLRKQGTAAARKDPGAGLGIEHLGGPTRVATTLGKVRSPTMLSQDGTAAGVLTVSGDASFTNDNLIARETMLSQSASQLERRDSLKEDPLRRYSDVLSRQGSGAENGGSTIDAEIATLERLNQQDSQLCDELRASCTIGNSNRNTKTSGGQQVARSCWSLVQGALPKGPFSGTTSPRSAEKGAKAGGKGEGDREGGESSGAKKRVFSKYDEETTSILTEWFLSHKRWPYPAAKEKDALAEATNLTTLQISNWFTNKRKRHWTPVIKKRTRSPRDFFEFCVMNPKEHSLVEKRDGKETKDHVKPGGRPQQLADDNSGVRNSAYAASGATGAGVGNPQGGLSSVSGSSQAADQRGYSTSVHNGAQAVGFDGRVGDSSVETASANGIPVGSGWAHGAGGAD…	KKRVFSKYDEETTSILTEWFLSHKRWPYPAAKEKDALAEATNLTTLQISNWFTNKRKRHWTPV
Phaeophyceae	Fucales	Hizikia fusiformis	Hfu	LDRY-2012775	LDRY-2012775	SAM	nd	LDRY-2012775	onekp	MTLRKQGTAAARKDPGAVLGIEHLGGPTRVATTLGKVRPPTMLSQDGTAAGVLTVSGDASFTNENLIARETMLSQSASQLERRDPLKEDPLRRYGDGISRQGSGAENGGSTIDAEIATLERLNQQDSQLCDELRTSCTIGNSNRNTKTSGGQQVARSCWSLVQGALPKGPFSGTTSPRSAEKGAKAGGKGDGDREGGESSSAKKRVFSKYDEETTSILTEWFLSHKRWPYPAAKEKDALAEATNLTTLQISNWFTNKRKRHWTPVIKKRTRSPRDFFEFCVMNPKEHSLVEKRDGKESKDHIKTGGRPPQLTDASSGVRHSAYAASSATGAAIGN	KKRVFSKYDEETTSILTEWFLSHKRWPYPAAKEKDALAEATNLTTLQISNWFTNKRKRHWTPV
Phaeophyceae	Ishigeales	Ishige okamurai	Iok	APTP-2015642	APTP-2015642	SAM	nd	APTP-2015642	onekp	MTLPKRGAAVGTASRSAGPRTGRKESSPVLAKALADFRRASIPQLADTSKYLFSSRLEHPSSTLSDQADQNSAAGTDTAATSPASSLDTSITATFDTDVRRAAEIIEAETSTLERLNKLEAELHEELKRSLAGTDDGDSTNPRRASSWDLLIRGSSANKDAASNGSLKQGVNDENGSGTDGAANMDADGGGEGDDVQSSKGGAKKRVFSKYNEEVTNILTEWFLSHKRWPYPAAKEKDALAEATNLTTLQISNWFTNKRKRHWTPVIKKRTRSPRDFFEFCVMNPKEHSISDSNPKSRPPRSALDPPDANPVERDDDAYNVAAIARRGIEQSRGFVHDAGHTTTPAYSSVADGSTRRGFDGRVGNGAAEQRWARSGSNDSKWEAGPGVWNDRMSMPGCP…	KKRVFSKYNEEVTNILTEWFLSHKRWPYPAAKEKDALAEATNLTTLQISNWFTNKRKRHWTPV
Phaeophyceae	Dictyotales	Dictyopteris undulata	Dun	LIRF-2004173	LIRF-2004173	SAM	nd	LIRF-2004173	onekp	MMLTKDSNAAKGCKTQRIIPRASPESPLHTALTKFRQASLPEAVGRLAGSLTRFGALASIRNGTAQTTSSQASDDNAGNGDARRRDASDATLDSATERLVRLIEAETATLDRLNLLEDNLDKDIKASLKIKPLDTVNTKTKGTPTGPAASPTPGDEHPSVKAGWNLVHGGGVAKCNLAAASGSGDTQAQPHSTTKGDGGGASGGGGSGGKVGGEDGSDSGGTNGDEETRSRESGSRKRVFCKYDEETTSILTEWFLAHKRWPYPAAKEKDALAEATKLTTLQISNWFTNKRKRHWTPVIKKRTRSPRDFFEFCVMNPREQEDRTDRDREGKGQHVQQKDVQQVTQGTPHGTPPQEHHHNRNTECAQSTSQQVVNGRCVAGDLTQSANISGMPRVHVPPN…	RKRVFCKYDEETTSILTEWFLAHKRWPYPAAKEKDALAEATKLTTLQISNWFTNKRKRHWTPV
Phaeophyceae	Ectocarpales	Scytosiphon lomentaria	Slo	JCXF-2014481	JCXF-2014481	Ec-04_000450	nd	JCXF-2014481	onekp	MMTYGSITSSSSSGAMLLSSSASSMSEGGRGSGSPSVGDGGGSGSHTTSHSSIDASLSVTTRGAQEQLQHQDPRRPPSPTSSTTQHHPFSYPDEHTSLPQNYAPDCSDPLSFFLASGRGDSDPFGFGVGSVADGTFGGRKPSAEELMLFRSHRLLQAEAVGVAVGPSQASSADAARVRKRFGLASAALARQVRLKVLEQTNAALRCVRALGTGASPAQQQDVINAERRTCHRMLTGVLDTATSTLREISAGCGGGSVGLSGXXXASSAFSSSLLGSPVTESQQLASKWEDVAAAASINNNNGNNINNAGASSLASMHQQHQDEQKQQDQQRQQQQHQQHYQQKQQQQSIMHHMPPGMGRSSVFALTQMRDFSQHQHPSQLGAGPSGSSSSSAFMGMGVT…	RKGSRHRLTPQAKEILEGWLAKHWLNPYPTEDEKVYLAQNCHITVTQVNNWMMNVRVRRCRTK
Phaeophyceae	Ectocarpales	Scytosiphon dotyi (labelled Scytosiphon dotyo)	Sdo	ULXR-2006512	ULXR-2006512	Ec-04_000450	nd	ULXR-2006512	onekp	MLLSSSASSMGEGGRGSGSPSVGDGGGSGSHTSSNSSIDASLSVTTRGAQEQLQHQDPRRPSSPSSSTMQHHSLSYPDAHTSLPQTYAPDGSDPLSFFLASGRGDSDPFGFGVGSVADGTFGGRKPSDEELMLFRSHRLLQAEAVGVAIGPSQASSADATRVRKRFGLASAALARQVRLKVLEQTNAALECVRALGTGASPAQQQDVINAERRTCHRMLTGVLDTATSTXXXLGGVGIGIGMASSAFSSSLLGSPVTESQQLASKWEDVAAASSINNSSSSSSSNLGSSSLASMQLQHQEQQKQHDQQRHQQQHQQHHQQKQQQQSIMHHMPPGMGRSSVFALTQMRDYSQQQHPSQLGAGPNNNNSSAFMGAGGLPQEGAGSSTNSGAGAGARSFGGL…	RKGSRHRLTPQAKEILEGWLAKHWLNPYPTEDEKVYLAQNCHITVTQVNNWMMNVRVRRCRTK
Phaeophyceae	Ectocarpales	Petalonia fascia	Pfa	VRGZ-2014656	VRGZ-2014656	Ec-04_000450	nd	VRGZ-2014656	onekp	MMPYGSTASSSSSGAMLLSSSASSMGEVGRGSSSPSVGDGGGSASNTSSNSSIDASLSVTTRGAQEQLQHQDPRRSSSPSSSTMQHHSLSYPDAHTSLSQTYAPDGSDPLSFFLASGRGDSDPFGFGVGSVADGTFGGRKPSDEELMLFRSHRLLQAEAVGVAIGPSQASSGDATRVRKRFGLASAALARQVRLKVLEQTNAALECVRALGTGASPAQQQDVINAERRTCHRMLTGVLDTATSTLREISAGCAGGGVGLGGVGMGISMTSSAFPSSLLGSPVTESQQLASKWEDVAAASSMNNNSSSNLGSSSLASMQLQHQQQQKQQDQQRHQQQHQQHFQQKQQQQSIMHHMPPGMGRSSVFALTQMRDYSQHQHPSLLGAGPNNSNSSAFMGVGGL…	RKGSRHRLTPQAKEILEGWLAKHWLNPYPTEDEKVYLAQNCHITVTQVNNWMMNVRVRRCRTK
Phaeophyceae	Ectocarpales	Cladosiphon okamuranus	Cok	s125_11648mod	Cok_S_s125_11648.t1	Ec-04_000450	nd	Cok_S_s125_11648.t1	OIST (http://marinegenomics.oist.jp/algae/viewer/info?project_id=53)	MKPCERTASSSSPGAMLSSSSIASVGTSDTIDGGLSTVGGGSSNASSSNSIVGGSLCVSTRAVEHQHQHQHQHQHQHHQQQRQQQQQQLPQQQDLRSPSSPSSFAIQHSPLPYPDNHIVDPHQTYAPDNQDPLSFFLAAGRSDSDPFGFGVGSVADGTFGGRKPTPEELLLFRSHRLLQAEAVGVAISLSNASSAEQVLHKRFSLVSESLSTQVRTKVLEQTNTAVEYVRALGAAASPAQQQDIITMERRTCHRMLAGILDTSTGRLREILASANNDRPGAGVGFGAGLSSSLFGSPITESQQLASTWEDATTASSMNNNPLGSPLHSIQQQQQQQQQQQQQQHQSILHHMAPGMGRSSVFALTQKRDRSQHHPSRLGVNSNIGGAHNGGGVTHPEEKG…	RKGSRHRLTPQAKEILETWLAKHWLNPYPTEEEKLYLAQNCLITVTQVNNWMMNVRVRRCRTK
Phaeophyceae	Laminariales	Saccharina japonica	Sja	SJ19561	scaffold73:422661-427957	Ec-04_000450	nd	SJ19561	Sjap genome v6.1	MITCETASSSSSGGILLPSSASSQYSCEDNNNGGGGGGGGGGGGGSGSSSGSGGSGGSGSGGGGGSGSGSGGGGGCSDLTVATALSTHCVQEQGDHTRSSGFIVHHPLPSSDTQIVNLPQAYVPDNSDPLSFFLASGRSDRDPFGFGVGSVADGTFGGRKPTSEELLLFRSHRLLQAEAVSVAIGPSHTSSASIRQRFALISTGLARQVRMKVLEQTNAAVECVRALGGSASANQQQDMINAERRTCHRLLAGILDRATSSLREISCNNSNGISGGAASNAGMDSELSMGIGRQGLSSSLLGSPPPSESQQLASTWEDATTASSMNSTGSLMTSMQQLPPGQYQQQQQQQQSIMHMPSGMGRSSVFALTQMRDRPQHHTALGTPGGERQAAGGMSGLGA…	RKGSRHRLTPQAKEILEGWLAKHWLNPYPTEDEKVYLAQACLITVTQVNNWMMNVRVRRCRTK
Phaeophyceae	Laminariales	Undaria pinnatifida	Upi	FIDQ-2014175	FIDQ-2014175	Ec-04_000450	nd	FIDQ-2014175	onekp	SSASIRQRFALISTGLARQVRMKVLEQTNAAVECVRALGGSASANQQQDMINAERRTCHRLLAGILDRATSSLREISCSNSNSVGNGGAPSSAGMDSELGMGMGRQGLSSSLLGSPPPSESQQLASTWEDATTASSMNSTGSLMTSMQQLPPGQYQQQQQHMHMPSGMGRSSVFALTQMRDRPQHHTALGTDSRQATGGMSGLGALVSAHAGGMQDAGGSFNSGGSAVPVPSMSLNHATSGGLSGSTPFDTWNVTGGDVGRGGGGGGKQAASSIVKAKKKSGLLTKMGSHPPDLRRPIYNNRKGSRHRLTPQAKEILEGWLAKHWLNPYPTEDEKVYLAQACLITVTQVNNWMMNVRVRRCRTKKIGVATGPEEITYPATTPKAIAANRIGVRPGPGSQ…	RKGSRHRLTPQAKEILEGWLAKHWLNPYPTEDEKVYLAQACLITVTQVNNWMMNVRVRRCRTK
Phaeophyceae	Laminariales	Kjellmaniella crassifolia	Kcr	RAPY-2003690	RAPY-2003690	Ec-04_000450	nd	RAPY-2003690	onekp	GSGSGSGGGGGCSDLTVATALSTHCVQEQGDHTRSSGFIVHHPLPSSDTQIVNLPQAYVPDNSDPLSFFLASGRSDRDPFGFGVGSVADGTFGGRKPTSEELLLFRSHRLLQAEAVSVAIGPSHTSSASIRQRFALISTGLARQVRMKVLEQTNAAVECVRALGGSASANQQQDMINAERRTCHRLLAGILDRATSSLREISCSNSNGISGGAASSAGMDSELSMGIGRQGLSSSLLGSPPPSESQQLASTWEDATTASSMNSTGSLMASMQQLPPGQYQQQQQQQQSIMHMPSGMGRSSVFALTQMRDRPQHHTALGTPGGERQAAGGMSGLGALPSAHAGGVQDAGGSFNSGGSAVPVPSMSLNHTTSHPGSHSANGGLSGSTPFDTWNVTGGDVGR…	RKGSRHRLTPQAKEILEGWLAKHWLNPYPTEDEKVYLAQACLITVTQVNNWMMNVRVRRCRTK
Phaeophyceae	Fucales	Sargassum vachellianum	Sva	HFIK-2006317	HFIK-2006317	Ec-04_000450	nd	HFIK-2006317	onekp	MVSAAARGGYGSSSNRGDRGGGGDDVESGFIGLGSVSQMRRNHGTTQELSDSSSAPCFVVYAPQPSNTPKSNIEAAHIPDYPDPLSFFLINGKNGHDPFDFGLGSVVDGTFGGKPPTFEQLLLFRSHRLMQAHAVFVAMSDAYSLSASTRQRFSDIGGDLVRKVWAKLLEQTNSCIEHVRALGRVGGIPQDKKEAIIKDKRNGCHRIIADILDNTTRELQEILDMDIPYGGSGGSDTGSSFSSNNGSRSDTINTDRIIFSTAAAAAAVGPAKFGSETRDKIPLPLPMARSHLPSESHQIVLSNSMDPGVDERHSIIAATSCFRDALGQIGKRGDRHFGEFNAGGSAVPEASISPNHGGKAAPLAIETWNVGWGAASHTENTGGDKAKSISFKTALVGKN…	RRGSRHRLTSQAKEILEAWLTKHWVNPYPTEEEKLSLSQACGITVIQVNNWMMNVRVRRCRTK
Phaeophyceae	Fucales	Sargassum integerrimum	Sin	FOMH-2078936	FOMH-2078936	Ec-04_000450	nd	FOMH-2078936	onekp	MGKNGSKRGSCRGNRRGSRHRLTSQAKEILEAWLTKHWVNPYPTEEEKLSLSQACGITVIQVNNWMMNVRVRRCRTKKIGVATDPGYMERNNPKGP	RRGSRHRLTSQAKEILEAWLTKHWVNPYPTEEEKLSLSQACGITVIQVNNWMMNVRVRRCRTK
Phaeophyceae	Fucales	Sargassum henslowianum	She	FIKG-2015819	FIKG-2015819	Ec-04_000450	nd	FIKG-2015819	onekp	VSAAARGGYGSSSNRGDRGGGGDDVESGFVGLGSVSQMRRNHGTTQELSDSSSAPCFVVYAPQPSNTPKSNIEAAHIPDYPDPLSFFLINGKNGHDPFDFGLGSVVDGTFGGKPPTFEQLLLFRSHRLMQAHAVFVAMSDAYSLSASTRQRFSDIGGDLVRKVWAKLLEQTNSCIEHVRALGRVGGIPQDKKEAIIKDKRNGCHRIIADILDNTTRELQEILDMDIPYGGSGGSDTGSSFSSNNGSRSDTINTDRIIFSTAAAAAAVGPAKFGSETRDKIPLPLPMARSHLPSESHQAIASSNNWEESMNTSSITMSPLTSIPGAVLPPASQPQLEQQPTIPWHGGIDRSSVFPLTHDRDRSQRYSSLGAQIVLSNSMDPGVDERHSIIAATSCFRDAL…	RRGSRHRLTSQAKEILEAWLTKHWVNPYPTEEEKLSLSQACGITVIQVNNWMMNVRVRRCRTK
Phaeophyceae	Fucales	Sargassum hemiphyllum	She	VYER-2085919	VYER-2085919	Ec-04_000450	nd	VYER-2085919	onekp	AVFVAMSDAYSLSVSTRQRFSDIGGDLVRKMWAKLLEQTNSCIEHVRALGRVSGIPHGEKEDIIKEKRNSCHRIIAGILDNTTRELQDILNMGIRYGGSGGNDTGSSFSSNNGSRSDTVNTDRIIFSTTAAVGPAKYGSETRDKPPLSLTVARSHLPSESHQVIASSNSWEGAMNTTSITMSPLTSIPGADLPPVSEPQLEQQPTIQWHGGIDRSSVLPLPHDRDLSRRYSPLDAVLSNNMEAGVDERHSIMASASCFRDPLVKRGDPHIGEFNAGGSAVPETSISPNHGGKAAPLVIETWNVGWGAASHTENTGGGKAKSNNFKTALVEKNGSKRGSWRGNRRGSRHRLTPQAKEILEAWLTKHWVNPYPTEDEKISLSQACGITVIQVNNWMMNVRV…	RRGSRHRLTPQAKEILEAWLTKHWVNPYPTEDEKISLSQACGITVIQVNNWMMNVRVRRCRTK
Phaeophyceae	Fucales	Sargassum horneri	Sho	RWXW-2074779	RWXW-2074779	Ec-04_000450	nd	RWXW-2074779	onekp	FEQLLLFRSHRLMQAHAVFLAMSDAYSLSASTRQRFSDIGGDLVRKVWAKLFEQTNSCIEHVRVLGRVGGVSHSKKEDIIKEKRNGCHRIIAGILDNTTRELQEMLDMDSRYGGDGGDGTGSSFSNNNSSRSDTIKTIFSTTAAVGPAQFGSEIRDKTALSLSMARSHLPLESHQVIANSNNWEGAMNTTSITMSPMTSIPGAALPPVSQPQLEQQPTIQWHGGIDHSSVLPLPHDRDRSQRYSPLGAQIVLSSSMEAGVDERHSIIASTSCFRDPLGQIGKKGDRHIGEFNAGGSTVPETSISPNHGGKAAPLMTETWNVGWGAASHTENTGGGKAKSNNFKTALVEKNASKRGSWRGNRRGSRHRLTPQAKEILEAWLTKHWVNPYPTEDEKLSLSQ…	RRGSRHRLTPQAKEILEAWLTKHWVNPYPTEDEKLSLSQACGITVIQVNNWMMNVRVRRCRTK
Phaeophyceae	Fucales	Sargassum thunbergii	Sth	YRMA-2082306	YRMA-2082306		nd	YRMA-2082306	onekp	LNEYFYSHLSNPYPSEEAKEELARKCGISVSQVSNWFGNKRIRYKKNIGKAQEEANLYAAKAASAASAQQLVQAVSDPSSP	LNEYFYSHLSNPYPSEEAKEELARKCGISVSQVSNWFGNKRIRYKKNI
Raphidophyceae	Chattonellales	Heterosigma akashiwo	Hea	231575mod	CAMPEP_0200235178 /NCGR_PEP_ID=Heterosigma-akashiwo-NB-20140214|19882_1 /ASSEMBLY_ACC=CAM_ASM_001192 /TAXON_ID=536047 /ORGANISM="Heterosigma akashiwo, Strain NB" /LENGTH=331 /DNA_ID=CAMNT_0046231575 /DNA_START=405 /DNA_END=1400 /DNA_ORIENTATION=+	ORO?	nd	CAMNT_0046231575	iMicrobe (http://data.imicrobe.us/search - then search with species name)	MTIPPSSSSQVRSSKPSTRTLTVAEQQHLVNTLNLKILAAEGSTNTESEQESIIGNCKTTYNLSLEEKKLWAQRLRHEASKFLSLSECDWKMGAFEHLMKQLEHHQHRIVHYLTSSKDYRLKIVGSLLTPVEKQIITFKADSLGNHYLAYILRAAYEKIKFLQEVAQQSASKHGKDEVLPSAKKKKKGEDFKPPLKSEEGQVVSDDDESEEEQQQGTSSSLPSRKRLSKDQKSILHEWLVHNWSHPYPSDEEKEALARKCNISVKRVNHWYINARVRIWRPVTNEAARKAASTGSTNAVADLLRNCKSDNVFKKYLLGVTHRLTTFLPVCSDEVIANSCWLVFDDGSSRRPKDTVIKGDPR*	SLPSRKRLSKDQKSILHEWLVHNWSHPYPSDEEKEALARKCNISVKRVNHWYINARVRIWRPV
Raphidophyceae	Chattonellales	Heterosigma akashiwo	Hea	296151	CAMPEP_0200274790 /NCGR_PEP_ID=Heterosigma-akashiwo-NB-20140214|385174_1 /ASSEMBLY_ACC=CAM_ASM_001192 /TAXON_ID=536047 /ORGANISM="Heterosigma akashiwo, Strain NB" /LENGTH=663 /DNA_ID=CAMNT_0046296151 /DNA_START=50 /DNA_END=2043 /DNA_ORIENTATION=+	SAM?	nd	CAMNT_0046296151	iMicrobe (http://data.imicrobe.us/search - then search with species name)	WFSITHIEVVGALPTTMKKEATRVPAPSNDGDMKTSSLDHSARKYEKTDTEVLKDWLLSEENFAYPYPKAQIRDELCRRSGLTQAQLSNWMTNARQRIWKPVLKEVLSSVELKPILTTARKALHGTSKKRKAAPEMQEESEMKRNGGGYATIIEDAVRESCKENKRLVMSTMAGQLSHNKNSIAAFEREGPDNCPAFKEEGQNVVGKVKVENDDFKDERKAFRSAADSAIKTEVSVPKTNLPEESMRDSEELSPEDYVTPPLATRELVVPTWSPTTASGTERQEISPWLKFFQNNKREGQNMDSSNFFSGGTVSNQDHQQETNILLSQSKPFLLLHPNIFSAIAATSTLPQNQPRQPVLAPNSPKSAAAAAAAAQNGITTVLPCYSGTETTLPVLPRGA…	LDHSARKYEKTDTEVLKDWLLSEENFAYPYPKAQIRDELCRRSGLTQAQLSNWMTNARQRIWKPV
Raphidophyceae	Chattonellales	Heterosigma akashiwo	Hea	208647	CAMPEP_0200219902 /NCGR_PEP_ID=Heterosigma-akashiwo-NB-20140214|3255_1 /ASSEMBLY_ACC=CAM_ASM_001192 /TAXON_ID=536047 /ORGANISM="Heterosigma akashiwo, Strain NB" /LENGTH=269 /DNA_ID=CAMNT_0046208647 /DNA_START=187 /DNA_END=991 /DNA_ORIENTATION=-		nd	CAMNT_0046208647	iMicrobe (http://data.imicrobe.us/search - then search with species name)	MEIVEAHMAMQGHPSNLAQPRIPKNMSGSGLIEGHSLGKFDSSAGLKLQKDGDDSDSDDDDNMHDTIDDSISTTSTEILKAWILSAEHFCHPYPTPKEKKELQAQTGLSSLQLKNWFTNARRRTWRPLMQSILNGIDLEPILGQARMKHNVPNVFMHNGAMIMKDIGGPFCPKAPTEVLKAWILSDDNFIHPYPSLGERKALAGLTRLSAKQLKNWFTNARRRIWKPLMRRVMAKIHLAPILEAAAAKVLIRTRPSAGGGGGGGLGVAX	HDTIDDSISTTSTEILKAWILSAEHFCHPYPTPKEKKELQAQTGLSSLQLKNWFTNARRRTWRPL
Raphidophyceae	Chattonellales	Heterosigma akashiwo	Hea	218605	Translated CAMNT_0046218605		nd	CAMNT_0046218605	iMicrobe (http://data.imicrobe.us/search - then search with species name)	AVSGPTKGLRFSRETTRLLEAWLYAHRANPYPTKKDFHDFQQATGCSTAQLKTWFVNNRSRKLWRGRRHQATTSHQQGKEQHPQQILVSADGPPQVQLAQLQAALTKSRGPKMQHLQQPQALSSVNNGPPLLQYVRQLQALAAENIALDPRPVMNTRIVPNNNNVIGDQVGNLPWHRLLAQATDRKLGIISSERSAAALLQYLQRQQPLSAPLLLQNHTFATKKSAMDSHVYPSASFGTGTTDELGYAQKRLTNLLHPPSSPAIVQQPAHGDLNQQQRVAALLQYLLRYSSSST*	GPTKGLRFSRETTRLLEAWLYAHRANPYPTKKDFHDFQQATGCSTAQLKTWFVNNRSRKLWRGR
Raphidophyceae	Chattonellales	Heterosigma akashiwo	Hea	222177	CAMPEP_0200228494 /NCGR_PEP_ID=Heterosigma-akashiwo-NB-20140214|13646_1 /ASSEMBLY_ACC=CAM_ASM_001192 /TAXON_ID=536047 /ORGANISM="Heterosigma akashiwo, Strain NB" /LENGTH=351 /DNA_ID=CAMNT_0046222177 /DNA_START=60 /DNA_END=1115 /DNA_ORIENTATION=+		nd	CAMNT_0046222177	iMicrobe (http://data.imicrobe.us/search - then search with species name)	MEEPPSNGTNSANTEILKDWILSEENFLYPYPKLEEKNELCRLSGLSQAQLTNWMANARQRIWKPVLKSLLASIDLKPILMKARASLREKTSGKTELMVHANKKGRKFSADESTSDLCSGKLKLSNDDEAQLKAAQLKARRDEVLTRKRPQPGNREALTESVASSGVGENGFGRVTKSAKRESNQTHQLPVPVNLDDSTKNSRATEREEEGQALVVLEEEFVTPPLITRDLVLPSTPPALEKMITIDGWSNVLESLKLERESLNLFAESGNNNQNNNRFPASKMYYHQPKLEQQPHFRHGLGTSWSFSGQPSVGGGSSIQLPSTGGAAMASWWFGEQKNNKKNNNNNYCLK	EEPPSNGTNSANTEILKDWILSEENFLYPYPKLEEKNELCRLSGLSQAQLTNWMANARQRIWKPV
Raphidophyceae	Chattonellales	Heterosigma akashiwo	Hea	229537	Translated CAMNT_0046229537		Zinc finger RING-type profile.	CAMNT_0046229537	iMicrobe (http://data.imicrobe.us/search - then search with species name)	LLRKYNKIDKIVMDDSSQIEKGRTSLPDDAVGILKGWIFDHVENPYPTMAEKDMLGRRTGLSQLQIKNWFANARRRALKRYKEEQGEESLGSDIQSSQTRKPPRKKRIVKAPSALYYCYICDNIGGNMQIDDCGHKFHANCLRMIACIYFDHEIIKCPQCSSGITSCTDVIVKQSMDSESRHPAMTSPRKQNVPLRN*	IEKGRTSLPDDAVGILKGWIFDHVENPYPTMAEKDMLGRRTGLSQLQIKNWFANARRRALKRY
Raphidophyceae	Chattonellales	Heterosigma akashiwo	Hea	284233	CAMPEP_0200268114 /NCGR_PEP_ID=Heterosigma-akashiwo-NB-20140214|233514_1 /ASSEMBLY_ACC=CAM_ASM_001192 /TAXON_ID=536047 /ORGANISM="Heterosigma akashiwo, Strain NB" /LENGTH=391 /DNA_ID=CAMNT_0046284233 /DNA_START=132 /DNA_END=1307 /DNA_ORIENTATION=+		Zinc finger RING-type profile.	CAMNT_0046284233	iMicrobe (http://data.imicrobe.us/search - then search with species name)	MEQVSFAGYLSPEHPELHTSADSKVRKPLPATSVEILKTWLFSPEHVTYPYPTADEQKQLSKATGLTSRQLKNWFTNARRRIWKKHNETVGVPQIDNGKPRRKKAPKNSKPKERIPVASAQNSTAEPPLSKDLLRDQDFGNLDNIFSEGKGKHSLKQEFNSDLKDALSFLMFDDPALSSQKMPPSENLAVRPRNCFEDFTMEPQQVAGNLVQNGQKVEGLILDQNYGLNSQQTFFVVPSKFEAQHVVDPAPLPSSRSNLSNPFSDFPSGTGAPAPQNPSFISSRHAANYAQVTQPPRFPGESCIQQPRFIMEAPPTNFVANTHINDEQCKCYICNQGGNDTRIEDCGHSFHGECLRIATLFYAKEESMKCPKCFTIITSCCQLTNSGPPSY	DSKVRKPLPATSVEILKTWLFSPEHVTYPYPTADEQKQLSKATGLTSRQLKNWFTNARRRIWKKH
Raphidophyceae	Chattonellales	Heterosigma akashiwo	Hea	290529	CAMPEP_0200271654 /NCGR_PEP_ID=Heterosigma-akashiwo-NB-20140214|308529_1 /ASSEMBLY_ACC=CAM_ASM_001192 /TAXON_ID=536047 /ORGANISM="Heterosigma akashiwo, Strain NB" /LENGTH=436 /DNA_ID=CAMNT_0046290529 /DNA_START=1 /DNA_END=1311 /DNA_ORIENTATION=+		nd	CAMNT_0046290529	iMicrobe (http://data.imicrobe.us/search - then search with species name)	QQLDYTIRISIYPGGGRLLQGHSIRMAGQCDFEDISDLDPFFVEEDQDEDDFDLETEEGGKGQIMPKSKRNAYLKDWLLDPKHFAYPYPSSEEKKVLCSTTGLTSKQLKDWFTNARRRTWKPILNKILESVDLISILNEARKGPSSKKRKTSPAAKLDPKTSKKPKAEPEPFVVKQEPSSEAPSLPETSECVQIEVKKEVEEVLVTPPTQNRVITAEDLKMDFMKSKRDTAMSFSGLKMKGFRSGGSSILFPSATPKKESGFPSMASLRSLDTSALPKPNFGVSALPKPPNFDPSALPKPKFDTSALPKPKFDTSALPKPKFDTSALPKPKFDTSALPKPKFDTSALPKPKFDTSALPKPKFDTSALPKPKFDTSALPKPNLVDAGMPNVQQHEPQYNS…	GGKGQIMPKSKRNAYLKDWLLDPKHFAYPYPSSEEKKVLCSTTGLTSKQLKDWFTNARRRTWKPI
Raphidophyceae	Chattonellales	Heterosigma akashiwo	Hea	291189	CAMPEP_0200271980 /NCGR_PEP_ID=Heterosigma-akashiwo-NB-20140214|318075_1 /ASSEMBLY_ACC=CAM_ASM_001192 /TAXON_ID=536047 /ORGANISM="Heterosigma akashiwo, Strain NB" /LENGTH=327 /DNA_ID=CAMNT_0046291189 /DNA_START=1 /DNA_END=980 /DNA_ORIENTATION=-		nd	CAMNT_0046291189	iMicrobe (http://data.imicrobe.us/search - then search with species name)	XHSKYIYYVVGGGGFPFARTPKSQMEEVSDEVGTGGFVGEVPECDEQVLENPAKSPSDALEEESDDQEDDNEESDNDNEGENTGQNVVIEQKSNDVLKAWLLSPENFVHPYPSTKQKKSLQHETGLTSLQLKNWFTNARRRTWRPIMNRIFEGLDLEPVLEKGRLQWAVPNTRMCHEREGMVTLDGALYTPQKKTSYLKAWILASENFIHPYPNFRDRKLLSLLSELTAKQMKNWFTNARRRMWKPLMAALFRRVALGPALAREAARLRPRGSKKGIRRCDTKSTALRGVTRALEEDELAAGGAEGAALTAKRPRPRHEELATLGAG	NTGQNVVIEQKSNDVLKAWLLSPENFVHPYPSTKQKKSLQHETGLTSLQLKNWFTNARRRTWRPI
Eustigmatophyceae	Eustigmatales	Nannochloropsis oceanica	Noc	4876	nanno_4876 genomic scaffold, NannoCCMP1779|94-mRNA-1		nd	NannoCCMP1779|94-mRNA-1	http://www.bmb.msu.edu/Nannochloropsis.html	MVRARGEVYGALGRGREGHRAGGGLEGDLRGRERVYLLRLAETYLARLEALLEEGGEEEEGGEEEQEAMLTQTTVASMITVASSNSSRSTSSLLTPSVATTTTTQRRKKRAFPPPAFPPPSSASPSSSSSSSSASALLQDWLLSHWSHPYPSQAQALALASACRLVNAEKVDTWMMNQRQRTWTPRTKAAYARARAERSARPLLALLDAVGERNTGGGLVVRGREEDEEAGDMCKMALLRMVAEENEGMGGDDRNGQQQVQLQQNKNKRKKVVGGL*	ASPSSSSSSSSASALLQDWLLSHWSHPYPSQAQALALASACRLVNAEKVDTWMMNQRQRTWTPR
Eustigmatophyceae	Eustigmatales	Nannochloropsis oceanica	Noc	502	nanno_502 genomic scaffold		Zinc finger, C3HC4 type (RING finger)	NannoCCMP1779|94-mRNA-1	http://www.bmb.msu.edu/Nannochloropsis.html	MRQGGGEGGYLVGMTSNSSLSSGGSGAGSGRDRQSGAVRKSRHGNSSSANGRDRHHLDFLEDEQAEYYGGGGGGGVRGNGIGSSSGGGKKTGKSRRELPNGAVATLKRWLLSPEHFSHPYPSTQDQAQLMAATGIDKKQLKNWFTNARRRIWKPLMKKQMEEGHGGGEMGGKEGLPPKSKGSLHQAKRGGGAGGGAGLPRHQQQHHHRPHALSIPPLPSAEAVAAVAAVGGVGGIHNHNMLDSYSSSQGDPSSPQSFPSPSHSPHQQQHQKHPTHLHGLHSSSPTAAATAAVARQQQQQPSYGQLHYQVAARPGSPTGGGGGVYYPRHTTNLSHTSGYGNSGDGTVSSLPPHLQHQPQSMGGTGGGRDGGTLTTMGSLGTLSGFASVEDFFKNFLGDSN…	TGKSRRELPNGAVATLKRWLLSPEHFSHPYPSTQDQAQLMAATGIDKKQLKNWFTNARRRIWKPL
Eustigmatophyceae	Eustigmatales	Nannochloropsis gaditana	Nga	100354g1	Naga_100354g1		nd	Naga_100354g1	http://www.nannochloropsis.org/	SFFFFRASPSPGDRPLPSSPLPLPPRILHAWLRAHWTHPYPSHAQALALAARCRLPSAEKVDTFMMNQRQRTWLPQTKRAYAEAKEARSARPLLALVREVEGGEGEEDGEGDVCKRALERMVAEEGARGEAARGEGGEREVDAAELVWL*	PGDRPLPSSPLPLPPRILHAWLRAHWTHPYPSHAQALALAARCRLPSAEKVDTFMMNQRQRTWLPQ
Eustigmatophyceae	Eustigmatales	Nannochloropsis gaditana	Nga	100192g4	Naga_100192g4.1		Zinc finger, C3HC4 type (RING finger)	Naga_100192g4.1	http://www.nannochloropsis.org/	MSTSPLSPTGNGVRGRSEGAGEDAGALRRWSKGGEECEGDQARGEDGKVGRRVDDDMLNYGDRRVDDDMLNYGDAKEKEDGHAETEEDEDGSQASGDFGVGREEEGGEEEPRPEVDLKPRAEEVPTAGVERRRSRRETRGRHSLREGEEEGGLRGLGQGSNASVISGGSQGGRRGPKGGKQARSGGSNSNSGGKAAHAQPQDLQYYDMDDFMEGEGGSGPGKKCAKKSRRELPNGAVATLKGWLLSPEHIAHPYPTAQDQVALMAATGIDKKQLKNWFTNARRRIWKPMLRRQTDESGGPGRVSRGGGAGLDGGGVGNGAGLPPSPSSSTARGGLAPGSLQLPPHYHPSGALARSPSPLSPSGMGLGSPPLHNHSALDSFTSRSAAASPEPFSPRLYRS…	AKKSRRELPNGAVATLKGWLLSPEHIAHPYPTAQDQVALMAATGIDKKQLKNWFTNARRRIWKPM
Pelagophyceae	Pelagomonadales	Aureococcus anophagefferens	Aan	17	Scaffold_17:242529..243692 (no model)		PHD zinc finger	No gene model in database	JGI (http://genome.jgi.doe.gov/pages/blast.jsf?db=Auran1)	DRTCATAAGDALGSAHQISPRRASRGKLITRGCRRRARRRSRRSRRRCAAHRRATVRAGRALYGAALDDAGRARVQKNVRLLWGPTRPGRRDYGEAGLPGDGDEVSEDSGGYCVCGGDGGGRMVQCDRRDACGSGRSWFHLECVGLREFPAPGAAWLCPDCRAQATPRRSPGVAGLLVCVKYEADGTVAFDELNSFKGKLELIQAHISSCEDSVTDLLTSVEALRERNNKKRAEHLAECRQLAKDIAALDQDLRRPDLKPSHHPFPPDVVSILKEWLSTHFDNPYPTRQEKEQLMAKTGLDAAQVNHWFKNERRRGKECRVRAGPNLKPSHQHTPDAVSILKEWLSTHFDNPYPTRQEKEQLMVKTGLDATQVNYWFKGARHRMRVK	LKPSHHPFPPDVVSILKEWLSTHFDNPYPTRQEKEQLMAKTGLDAAQVNHWFKNERRRGKECR	NLKPSHQHTPDAVSILKEWLSTHFDNPYPTRQEKEQLMVKTGLDATQVNYWFKGARHRMRVK
Pelagophyceae	Pelagomonadales	Aureococcus anophagefferens	Aan	CP_0186657456	CAMPEP_0186657456 /NCGR_PEP_ID=Aureococcus-anophagefferens-CCMP1850-20130821|6004_1 /TAXON_ID=44056 /ORGANISM="Aureococcus-anophagefferens-CCMP1850" /LENGTH=258 /DNA_ID=CAMNT_0029516157 /DNA_START=102 /DNA_END=873 /DNA_ORIENTATION=+		nd	CAMPEP_0186657456 /NCGR_PEP_ID=Aureococcus-anophagefferens-CCMP1850-20130821|6004_1 /TAXON_ID=44056 /ORGANISM="Aureococcus-anophagefferens-CCMP1850" /LENGTH=258 /DNA_ID=CAMNT_0029516157 /DNA_START=102 /DNA_END=873 /DNA_ORIENTATION=+	iMicrobe (http://data.imicrobe.us/combined_assembly/view/13)	METHGATAAHITGGGAAALDGLYFLLQAAETAAPSTAAPEPTFAKKSAVDGSASARSGAAPSTRFVPRTGTTEAFEKWVLEHADHPYPTNELLHTFADTWGAPFVYVSEWFRNMRKRKYLPLARGKRGPHGAFETALVGLIPAAARERAGEEYKGRRRAVPQLPVSHQAAAAPAREAPARAADVAVPRRPAPLVVHALLARGPVDEPAVAVEPVAAEPAIQASVEPFPPPAGVPPLVAIAGPPPAPDSRTRGVLDRLX	APSTRFVPRTGTTEAFEKWVLEHADHPYPTNELLHTFADTWGAPFVYVSEWFRNMRKRKYLPL
Bacillariophyceae	Bacillariophyta ordo incertae sedis	Phaeodactylum tricornutum	Ptr	EG02213.t1	Phatr3_EG02213-E2, Chromosome 27: 127,015-132,481		nd	EG02213.t1	JGI	MPSPHSGCFVLFASIYTAAANMVVVYTPLSIWVQCASLAFTLGGMHGDLLAIRFFLFLAYVFLFLNACLGSPLWGAPTNSGGVAVDSLLWAVLNMYVHGSSLVRLVLDERPVHLTEEEDALWRMFYRTGGLSKRLFHAILVPHLEVIEAQAGDELLTEDFFYIQYHGRAHLQVLDGERLVADRYTRSGEMFDFKCLGMFPANTMIAKHVVKCRCENRTKLFRFSRANMERIAHHNFVKGIWQSLLINNISFVLERQRVDDRDCILPEGACDAIFAPLQPWEEPNSILAGSNKSLSRPTAHLLFSIHKSFSPPWPFGGHPTGMRQVQLPPPVPPPSGDPQAYPPLHNISSRGWHDEDEDDIGTTGHRMRTWLWSIPRRVMSRRNSAESSSSTPALGELEP…	NKRKSTSLPTETVEYLKAWMMSPEHIAHPYPTEQEKAKIMADTCIELKQLTNWFVNNRKRYWKPR
Bacillariophyceae	Bacillariophyta ordo incertae sedis	Phaeodactylum tricornutum	Ptr	EG01287.t1	Phatr3_EG01287, Chromosome 5:295681-296913		Zinc finger, C3HC4 type (RING finger)	EG01287.t1	JGI	MLQSPVQPLNCSLRVRKKSPTADKSFKWPAEFIDDQLNPLMDDMFDDDDMGSAGDGGNVKGRNKSRRELPAGAVATLKAWLLSPEHFTHPYPTPQDQVMLMQKTGIDKKQLKNWFTNARRRIWKPMLKKQIEQGKLTATGGIPGSIQGLLMPSMAGAPAPNGSMDNPHSVQAMRVHYQQVVDQTQSQQQQSSSGSTDIYGNSIYSSAPSNEQTNDAHYYSSTLPSDQGMQSNPQLSTSSSIGTLPQLSSSTQLSKTDSHAVLMELFARDQDLVRQATESARLKAEAKQHPQTTSIASQQQGANQNPMKAPSHNALPNVPTLNSWPHFSSITSLSNLGTIPGVKSVSSLSGADLASQGNLNKMGNLAQVKSMDSIGKNDSYAFLEVFFGGDRNSTNNLNA…	RNKSRRELPAGAVATLKAWLLSPEHFTHPYPTPQDQVMLMQKTGIDKKQLKNWFTNARRRIWKPM
Bacillariophyceae	Bacillariophyta ordo incertae sedis	Phaeodactylum tricornutum	Ptr	J50050.t1	Phatr3_J50050, Chromosome 26:251340-251450		nd	J50050.t1	JGI	MQSPNGNNCSINPATPVRSTSSTAPPSKRRSVRRPNDDLELMLQHENFPHLLNLAHKIKTAHVRIQSVTTGFEPSQALAKYSLAPSEVMEAVTRLQNQFVSSETSRETIRPGVYPMTDILVMDSIETLQREWEHCQKWLEASESTRLDKDPTAEPAVSEPPTLPKKRKASGANSGSKKEAIAVKYSKWQTDILMNWMIQHVDEPFPKQGEIHQLMDMTGLTQSQVINWTTNVRKRNRKATCQNGKKPHHFIDFVFLAHDRERRARKASSIATAHPLMTGLDSFQNAPRENILAVPPSPSACAVPTRQAASSYSYPSPPSYPQPTYNHTSLSYFANQTPDFKCVHTVPFSPGTMASSPPRCAEDSAIQEHSQTLMQEEMWEIHDDFDPVPMEEESDEFIM…	KEAIAVKYSKWQTDILMNWMIQHVDEPFPKQGEIHQLMDMTGLTQSQVINWTTNVRKRNRKAT
Bacillariophyceae	Bacillariophyta ordo incertae sedis	Phaeodactylum tricornutum	Ptr	J41109.t1	Phatr3_J41109, Chromosome 27:376655-376789		nd	J41109.t1	JGI	MEESFSRPHEEGSGGLPPTLLPTKVYGSQPQYNRPFPYPEAPVRWQVGSILEWFESLAQAAEQGEFQNNFHLGNQQHRQPIGGSELPLADPVPLPPWYTQPVSNEEAVIDETSCNAATPKNWDLSFVEHQDPWGWSDRQRMAKVACQVEASSSINCEKYHGIRTRFEFLFGRCVFQHSTPVEHGQRRMILRVLYEETIAKLRELLGNHQPPLHQIPDKILSESSPIATKQDLSKYMTAWLRENWTNPYPDDQGLATMAQACHTTPTVVNNWLINARTRKWRRAITKATNMHRPAKLLLEDSLRIFDGEEVRELGNLAMEISSSCSEANDMEGPMHKRHKSGM*	SESSPIATKQDLSKYMTAWLRENWTNPYPDDQGLATMAQACHTTPTVVNNWLINARTRKWRRA
Bacillariophyceae	Thalassiosirales	Thalassiosira pseudonana	Tps	260879	THAPSDRAFT_260879		nd	XP_002286141.1	NCBI	QYMNKKRTTMSLPQETVDYLKAWMMSPEHIFHPYPREQEKAEIMAETGIELKQLTKWFENNRRRYWKPR	RTTMSLPQETVDYLKAWMMSPEHIFHPYPREQEKAEIMAETGIELKQLTKWFENNRRRYWKPR
Bacillariophyceae	Thalassiosirales	Thalassiosira pseudonana	Tps	260880	THAPSDRAFT_260880		nd	XP_002286142.1	NCBI	LPQETVDYLKAWMMSPEHISHPYPREQEKAVIMAKTGIELKQLTKWFENNRKRYWKP	LPQETVDYLKAWMMSPEHISHPYPREQEKAVIMAKTGIELKQLTKWFENNRKRYWKP
Bacillariophyceae	Thalassiosirales	Thalassiosira pseudonana	Tps	261453	THAPSDRAFT_261453		nd	XP_002287402.1	NCBI	QYMNKKRTTMGLPQETVDYLEAWMMSPEHIYRPYPTKQEKAEIMAETGIELKQLTNWFANKRKRYWKPW	RTTMGLPQETVDYLEAWMMSPEHIYRPYPTKQEKAEIMAETGIELKQLTNWFANKRKRYWKPW
Bacillariophyceae	Thalassiosirales	Thalassiosira pseudonana	Tps	268351	THAPSDRAFT_268351		nd	XP_002288020.1	NCBI	MQRYLRNLIKGNESMTASDMNKDDRPSSQKESMNNIPTCLDANGNNNVVTSNYGIFKLPSRKRGDECNTSFCSETSSSNFQDGYGGVASPNSITNSTSNTITSLSKRSKNSTGLQKNDKAVDVLNENSVIARFSTQTECAKFLRATPEAVSYHCSKGGGVCNGLVIRPADKNNTTFGLFDGAEQYRPKERPQLNKEAVEILKDWLLSPEHVDNPYPNQSESKMLMEQTGLDKTQLKHWFNNARKRILKPFLKKADYPPSDRRKMASSRAAKKEPSSVAHSRSSSFKDPSPLSFQGVNSANFSQASLARCGHPIFDDGCSLQRRSPGPAMCFGTNEGGMNAGNNFGGSTIGGMGMGFGAFGSNDQGGQQHSFSNNGFSAFCQQLPSSSQQVGAIHDDLLP…	KERPQLNKEAVEILKDWLLSPEHVDNPYPNQSESKMLMEQTGLDKTQLKHWFNNARKRILKPFLKKA
Bacillariophyceae	Thalassiosirales	Thalassiosira pseudonana	Tps	261967	THAPSDRAFT_261967		nd	XP_002288601.1	NCBI	QCMNKKRTTMRLPQETVNYLKAWMMSPEHISHPYPSEQEKAEIMVETGIELKQLTNWFLNNCKRYWKPRE	RTTMRLPQETVNYLKAWMMSPEHISHPYPSEQEKAEIMVETGIELKQLTNWFLNNCKRYWKPRE
Bacillariophyceae	Thalassiosirales	Thalassiosira pseudonana	Tps	262322	THAPSDRAFT_262322		nd	XP_002289987.1	NCBI	QYMNKKRTTMSLPQETVDYLKAWMMSPEHISHPYLREQEKAEIMAETGIELKQLMKWFANNRKRYWKPR	RTTMSLPQETVDYLKAWMMSPEHISHPYLREQEKAEIMAETGIELKQLMKWFANNRKRYWKPR
Bacillariophyceae	Thalassiosirales	Thalassiosira pseudonana	Tps	22757	THAPSDRAFT_22757		CW-type Zinc Finger; HMG boxes A and B DNA-binding domains profile.; SET (Su(var)3-9, Enhancer-of-zeste, Trithorax) domain	XP_002290717.1	NCBI	MNDGTSNTSSNENGGALTMGRIPKKKKSNPPPDADAHAQSPPPPPPVPAEQPVEAAAPLAPPESPPAKKEEDNPPAPCPPKRTPSPEKQRHRGSGLIVLRKGDLVKMSNESGRIQGGLARITRAHFPPDDTVGEPIAYDIEYVLGGKVHNLDRHELVYTTAEAEGLISSGSRSRLLREQRQVAVSETQLDKIDRELETKKGAKKSSGNGGESSGETKSPTKSPAKRKEDDIAALYRKIMSEKGEPSKDAKGAKKQKVGDAETTAKPKSKGPGKAPVKDKPPAKSTTTTTTRNSKKTKESSSRRSSKRNSATDTTDESDANVPFEDRKAMDMYTRHKREFERAIVRLQKVDRFGFFLDQPPAEFDESYDVTESDKESDDGIRLSVGRDIVFPDTPPFNFV…	KKTNPMTPEQVNYLKSWLLDPRHILNPYPTDEEKNVIMRDIGCERKHLESWLGRHRKTVCNPE	PKKNRGVGKFVPFPKTTVDYLNKWFFENSHNPFPTPDMKDKMMAATGLNRRQLSDWLAKARKKQKKN	DESPTKTSKQLGFPQETKDYLWAWVRSHTSNPFPSKCEKDKIMKDTKLGLEDVRRLESWFTRARKKIKEE
Bacillariophyceae	Thalassiosirales	Thalassiosira pseudonana	Tps	263463	THAPSDRAFT_263463		nd	XP_002292139.1	NCBI	GSTLGKPEELLLQLKKSTAQTTNNHHHRTADEQSTYEQKRFSKPTIDYLKQWFYEHRNNPFPTPDEKDEIIAATGLSERQVKDWMAGARRRQ	STYEQKRFSKPTIDYLKQWFYEHRNNPFPTPDEKDEIIAATGLSERQVKDWMAGARRRQ
Bacillariophyceae	Thalassiosirales	Thalassiosira pseudonana	Tps	24178	THAPSDRAFT_24178		nd	XP_002292651.1	NCBI	MDDFEKFIRHSDFGKVLDLAGKLKEQKSRLVTFAEHDGLQDSDSPPSMPLQTKKKKKKTEFLSNRAEKWLDPPLHDAALEDAWRDNRPAGRRRPAAFESAADLIRATLILAEDGDDLAASSMKDITPPRMGRGECVITDSLIDETIKSLAEELRFYMDLKHQARDMPAMQLICRTKSRDDTDERTNQVAAKFTKWQTDILTEWMIDHRAHPFPTPAEIKELAKVTDLSETQVVNWATNTRKRNMKATIDKERKPHHFLDYLFLATDREKQIKRDNPNKDFSYQERPQRRREPPPALPDAMLMASMKHVGISTRPNTSDELKTAADLDTYLMPPPANRVVSSFSSNLSMNPSFENKSYPVNELRSKSKSPPRFTYPRPPSFPPPPPASHYQSQYTPQHDI…	TNQVAAKFTKWQTDILTEWMIDHRAHPFPTPAEIKELAKVTDLSETQVVNWATNTRKRNMKAT
Bacillariophyceae	Thalassiosirales	Thalassiosira pseudonana	Tps	269690	THAPSDRAFT_269690		nd	XP_002293403.1	NCBI	MATVEISTRSNGKHATKATSRKPKSASLPQETVDYLKAWMMSPEHISHPYPTEQEKAEIMAETGIELKQLTNWFVNNRKRYWKPRVEAKLQPATTTTSSRRDRGTSAAESKPHAVPTRQSERKITIKSTTGYSSSSDSYGSGGESGPNSPHDDDEEEEVDHLVPFEDPHTISEGSSSPEHSDDDEEFSIDTSSLGRRSSNTSISYNASLR	PKSASLPQETVDYLKAWMMSPEHISHPYPTEQEKAEIMAETGIELKQLTNWFVNNRKRYWKPR
Bacillariophyceae	Thalassiosirales	Thalassiosira pseudonana	Tps	6752	THAPS_6752		nd	XP_002296073.1	NCBI	MEYEKVNIMSMPCSNVSRLQPLPLKRATNNGIIINPMKPSAATSTPIHPLQPSISHKILYPMRSLVNDSSANISTETAIKWMGLKPLDFVDRIVCMAAESSKLSSFVSGGELGEGYSFLQLFQSGNNGVVVGNKRKRQVTFDDDECFDVNDNDYDECAGSVLNNRDNFNSSPPDDTFKPWSPSAVLFGTVGGYHGEHVSKQVQYLDAIVKSFEQLAVHPMQTWFIPSYNRVQFSFALDINELGVECVLKRALSQMMALMELASKNTTMDGASKSTSQSNANSIIVPPPSNKWFISEKEKQSVFNSTLTSWLRQSENFVNPYPDDIVLDQLVRRLISLGCITTTDGSAVARQNLMDIALEKINVWLTNARSRKWRPSIEIAFDAKRPAMLLLEDSLRNFD…	ISEKEKQSVFNSTLTSWLRQSENFVNPYPDDIVLDQLVRRLISLGCITTTDGSAVARQNLMDIALEKINVWLTNARSRKWRPSIEIAFD
Bacillariophyceae	Thalassiosirales	Thalassiosira pseudonana	Tps	264573	THAPSDRAFT_264573		Zinc finger, C3HC4 type (RING finger)	XP_002297001.1	NCBI	MSSASLLSLPYTTNNVLSESLTAAVARTRTPSLKKSMSSAISYVEHDNSSDDEAGPSKGKKSRRELPAGAVATLKAWLLSPEHFTHPYPTPQDQQLLMQKTGIDKKQLKNWFTNARRRIWKPMLKKQLEAGKLAAGGGVVLASGGGGGLGMGGAAGVEGGGMMQGDGGEGLPGLPVQQASSEMYSNFQHAQMQQQTNGYDPNQQQQQFQQSGYDQYGQYQPQQQSYQPNYDNQQQQQQQQQPNMALSNSIGSLAPMNPNGGTNNASSASLSNHMIKTDSHAVLMELFARDQDLVRQAAGKSNGGGGIAAAAVQQQQQVQSQQQVASAGGGGLQGSGQSGNLRFSMPASAGVAQGGTPSGSMGQKQLSVTFDRVPTLASWPHFSSVSSLNNLGGIQGVKS…	KSRRELPAGAVATLKAWLLSPEHFTHPYPTPQDQQLLMQKTGIDKKQLKNWFTNARRRIWKPMLK
Bacillariophyceae	Bacillariales	Pseudo-nitzschia multistriata	Pma	121340	PsnmuV1.4_scaffold_9:97326..100416 (+ strand)		Zinc finger, C3HC4 type (RING finger)	PSNMU-V1.4_AUG-EV-PASAV3_0121340.1	http://apollo.tgac.ac.uk	MTDNFHSDEDDGGGSKPRNKSRRELPTGAVATLKAWLLSPEHFTHPYPTPQDQVMLMQKTGIDKKQLKNWFTNARRRIWKPMLKKQLEQGKLATTGTSGGVAVPGVVPGLMVTNMPGQSGAAPLPQPVQAVQEVQVDQHGNRIYQTHPAAPVPAPYSDPGASAYKNISAPSSMIAASSAQLLSKTDSHAVLMELFARDQDLVRQATESTPRKEPAPPQPQIQGVTNQVHTGIPQQQLAQALSNQHPMKNPSHSRLPNVPTLNSWPHFSSVSSLNNLGTMPGVKSITSLSAADLAKQGPVNTVGNLAQVKSVESMGKNDSYAFLEVFFGDRSSNNLSSMGGASSGIQRSLKRERDEDNNVGLSLEDESPAATAHGIKQEPGSSVTGASTGFASNNPYAAD…	RNKSRRELPTGAVATLKAWLLSPEHFTHPYPTPQDQVMLMQKTGIDKKQLKNWFTNARRRIWKPM
Bacillariophyceae	Bacillariales	Pseudo-nitzschia multistriata	Pma	26070.1	PsnmuV1.4_scaffold_16:144206..157843 (+ strand)		nd	PSNMU-V1.4_AUG-EV-PASAV3_0026070.1	http://apollo.tgac.ac.uk	MTSVVRVNVPGIPAVKSNDPASPSPKKSNGKRKSASLPSETVEYLKAWMMSPEHIAHPYPTEQEKVEIMKATKIELKQLTNWFVNNRKRYWKPRVEARLQQQAQAAQAAVQAHNAAVAAVSATKCAXAQKQLMVGVGLDSSRTNLLSSPVTGFKLASRTTLPSKVINSPILRFDSITSPPPTLQQKPFASSPLTLMAQVLDHQSKPFVPIPRTSTATVTNTESSSTAAASVSASEGEMSDSGNASDDISMDGANVLVPEHKFIHHKMKKKSLIKSKISSINPQLTSSQTIQDATSARTSHARNVSFCSLDKIPSNAASISQISAASSVSSNNSKKRANVDNELPLVVATCTTIHTPKRFRTESTNLWRKKCEDATTYIDEDLPSLDEAARLFGFTSA*	GKRKSASLPSETVEYLKAWMMSPEHIAHPYPTEQEKVEIMKATKIELKQLTNWFVNNRKRYWKPR
Bacillariophyceae	Bacillariales	Pseudo-nitzschia multistriata	Pma	HD	PsnmuV1.4_scaffold_96:61260..60444 (- strand)		nd	No gene model in database	http://apollo.tgac.ac.uk	MTTDPARSSPTKKRKSQGRGRSNSLPTHVVDYLKTWLMSPEHINHPYPSEAEKARMVADTGIDIKRLNNWFVNNRIRFWKPRYEAMQKQLRPEERSTKIVKSNSLLSSETNSAPSPTELSRRSQQSRNNFGAQEVTRSDLPTPKLFDQKVEFGNLSSTAMTNDVFATVSDDDSCSSSGNLLPNRQSPNFHMKKTSMFRRCRKRQRTEIEDDRSHTDYQVEDSPRFKHTFNREEQWKLACSTSFSSYSDLDDTNLPSLDDAVHLFGYSTLTSN*	GRGRSNSLPTHVVDYLKTWLMSPEHINHPYPSEAEKARMVADTGIDIKRLNNWFVNNRIRFWKPR
Bacillariophyceae	Bacillariales	Pseudo-nitzschia multiseries	Pms	64091	estExt_Genemark1.C_510031, scaffold_51:104249-106742		Zinc finger, C3HC4 type (RING finger)	161633	JGI	MTDNFNSDDEDGGGGKPRNKSRRELPTGAVATLKAWLLSPEHFTHPYPTPQDQVMLMQKTGIDKKQLKNWFTNARRRIWKPMLKKQLEQGKLATTGTGGGVAVPGVVPGLMVTNMPASVAAPGQYHDPNASAYKTIAAPSSMMTVSNAQQLLSKTDSHAVLMELFARDQDLVRQATESTPRKPAGQEALPPQSQIHTGASQLQASVPQQHQPSQAMSSHHPMKNPSHGRLPNVPTLNSWPHFSSVSSLNNLGTMPGVKSITSLSAADLAKQGPVNTVGNLAQVKSVESMGKNDSYAFLEVFFGDRSSNNLSSMGGASAGIQRGLKRERDEDNNVGLSLEDESPAASGHSIKQEPGSSAVANASSGFNSNHPYMSDKSATDSSDTLKRAYDDAMAARGLM…	RNKSRRELPTGAVATLKAWLLSPEHFTHPYPTPQDQVMLMQKTGIDKKQLKNWFTNARRRIWKPMLK
Bacillariophyceae	Bacillariales	Pseudo-nitzschia multiseries	Pms	14800	gm1.14800_g, scaffold_130:184396-188440		nd	14800	JGI	MAKDDANKRIQESFLEELEHNAVTGMWGFKEPTEWWSTMNCNARTGMDGMEFTKVLLVKDAYMPLYPDLAPLQIVMAAKGLCILTGVPNTTHIWQPTDMNYRPFKTYNSQHARKFTMQSDNIPRIVFRGRETPTCTLASTFYKAFLLKNGRQSGATLVTALPNGSVDLTADPMITKLLDLKVLNNTAGNYLMEYGLKCEAFAAKAPPQDRNSVSPVGSSLTQTKSKVFLKEGMNRIAETKTSTTKARAPAYAKKKGEAEALVAKCGGNFARLAVQHLKVIYEWKLGKKNKAAAAVGMKKEQLVAALLLVKAKDDVPVGAVEWSEEVDGAELQRLEKAEITTKEALLGKAMAAKLERKNDKGGTGGTNARYGYGYGCSVMGVPILVVVVDGDFTLERGIN…	GKRKSASLPSETVEYLKAWMMSPEHIAHPYPTEQEKVEIMKDTKIELKQLTNWFVNNRKRYWKPR
Blastocystae	Blastocystida	Blastocystis hominis	Bho	6845001	GIDBhT00006845001		nd	GIDBhT00006845001	Genoscope Blastocystis Genome Browser (http://www.genoscope.cns.fr/externe/GenomeBrowser/Blastocystis/)	MRRELDALNSRFSTDSKARATFVCNYSNKCASKPFVPNETNLLMKKQRRNRLPSAALEILWNFLREHRDNPYPTSQEKEWLAQQTNLSVTQIRNWFTNTRKRKLIQSQESDEEYLTDSDFSDSFHDSQTSSDSQPHKRRGRKKSSSTRSQGPLEMVQHQSTITMNDGTLSKVTKNQDGTWIQFLSAFDHNSNLNHSSDVDSEGAHQQQQEFSLPDFDNYTESNFSYDYSRTNLNNPEQHEYIINNEVATHVKRQQQQLSQQQLQLNQQLNQQQQQQENRQPSDSQM	KKQRRNRLPSAALEILWNFLREHRDNPYPTSQEKEWLAQQTNLSVTQIRNWFTNTRKRKLIQS
Blastocystae	Blastocystida	Blastocystis hominis	Bho	6039001	GIDBhT00006039001		nd	GIDBhT00006039001	Genoscope Blastocystis Genome Browser (http://www.genoscope.cns.fr/externe/GenomeBrowser/Blastocystis/)	MLRKEFALLFPHAIIADSRDGKHTIDDFQLVVSQGLQQLSETPKEYAYINSMVLNQFSRVEQLEKEFLVNEADTLLFETREDAEELLRIVSLDVKKAILDTALETIYSLPSTSDQDTTDSNSPSDYSPTSKPRRRRPNLPIYAKDILSCWFREHVDHPYPTQAEKIELSERTGLNLQKVDNWFINERSRKWRSYRRK	PRRRRPNLPIYAKDILSCWFREHVDHPYPTQAEKIELSERTGLNLQKVDNWFINERSRKWRSY
Blastocystae	Blastocystida	Blastocystis hominis	Bho	938001	GIDBhT00000938001		nd	GIDBhT00000938001	Genoscope Blastocystis Genome Browser (http://www.genoscope.cns.fr/externe/GenomeBrowser/Blastocystis/)	MNTALPTMMYPFSCTFPDNSVHVCFVTPEDYFQLVKMTGEPNASDSKDDTADEYEESESGCGRFSNFRKTRRMSLKRPNHSKYAKTLLLKWLTSPSHFFNPYPCATTKQALAKETNLREEQIANWFVNTRKRFLTPIMSDLHQKFGSKKIEVILTKPQLYAVLKDLLSDKVNRGYTPWLTAFLSDPCFCWLDECPV	LKRPNHSKYAKTLLLKWLTSPSHFFNPYPCATTKQALAKETNLREEQIANWFVNTRKRFLTPI
Blastocystae	Blastocystida	Blastocystis hominis	Bho	2012001	GIDBhT00002012001		nd	GIDBhT00002012001	Genoscope Blastocystis Genome Browser (http://www.genoscope.cns.fr/externe/GenomeBrowser/Blastocystis/)	MDLSQQGGPLDFIFQKKYTTRGDIDSLVLPQWLNEYYTVMEEFEGMCACDAEFEALIQPSFSAFCNTIKNYCFDFSFGCQCTGLFASEEDINNVMEIIWLEAVVGTCIKFMEDIVEFARVWKTQVQVTTQTKKNTTAKKAETKTRPNIPRKARDILEAWFKENVDSPYPKLHDKERLCTQTGLSMKKIDNWFINERSRKWHLYKRNCLH	ETKTRPNIPRKARDILEAWFKENVDSPYPKLHDKERLCTQTGLSMKKIDNWFINERSRKWHLY
Oomycota	Pythiales	Phytophthora infestans	Pin	1080	PITG_01080		nd	EEY58414.1	NCBI	MQAVAMQNMADVAAQVEDPTIKARYDQTAHRLHEWGERRIVQHQQQQEPINAGRGALPPLSLSLSQVSPYAMELAARNNVPKKRSSLSKLSKKLMHDWFEHNLHHPYPTEEEKEWLAREGGITLEQVNNWFINTRGRKWKPMINRLMQEKQAGNCSLYDKMAKRIEEPYHNP	VPKKRSSLSKLSKKLMHDWFEHNLHHPYPTEEEKEWLAREGGITLEQVNNWFINTRGRKWKPM
Oomycota	Pythiales	Phytophthora infestans	Pin	5545	PITG_05545		nd	EEY69321.1	NCBI	MMTTQQQSPDQVTPFAYPHGTSPAAVVSSSSSTSPAITDNATETNMSGGTAMSNRSATPSPPSAQRKRKQLSSPTDDAGANGSADAPDADKPKEQQPSKKSRRELPPHTVAILKGWMLSREHVKHPYPTDEDKQMLLKKTGISMKQLTNWFTNARKRIWKPMMRREHSRQMQSAMEFDHTAVREFPGAGLSQQYAESSYAPRAAVRHSFDAGSLGAPPHGAAAAFDRYARPQAIPVNAPLYPSRAVRSMSEAPARTDVDEYLDAERIRERVLERGQDGNAPRNSLSPRGHKILQEWVNANARREYPYPNDNERMQLAKDTSLDVSQVDGWVTSLREQMTPIRASSIPSAGNPAFPPPPAYGERRSIPSCGNPMFPPRPTGPGSMRPSIPSTGSPQFPPP…	KSRRELPPHTVAILKGWMLSREHVKHPYPTDEDKQMLLKKTGISMKQLTNWFTNARKRIWKPM	APRNSLSPRGHKILQEWVNANARREYPYPNDNERMQLAKDTSLDVSQVDGWVTSLREQMTPIR
Oomycota	Pythiales	Phytophthora infestans	Pin	20186	PITG_20186		nd	XP_002895686.1	NCBI	MEPPSHARLVAMRLLTATNTPEKQQAAKKSAQLCLSPTDPSEDPTMALAMASPVLTGKSAPITSPNPAKNPLPGLQFAISAQRAPSRELRLPSFSSPSYELEGATVATSSADEEESEQPVVEKTQRRKKGTRRGTLHPEAKNVLKAWMFSPEHFAHPYPSEEEKEELANEAGIEVKQLSNWFTNARKRLWQPVLRQSGVEVKNFLSTGRGGPRGNKLDVPTNLHQLVSPSPAPSPSSSPRKRSCSRDENTAPQLKDLELLAATSLLGLQHLTQSVH	TRRGTLHPEAKNVLKAWMFSPEHFAHPYPSEEEKEELANEAGIEVKQLSNWFTNARKRLWQPV
Oomycota	Pythiales	Phytophthora infestans	Pin	01135	PITG_01135		nd	XP_002909653.1	NCBI	MTFPNRINYKLRSREKSQQTATVSLHNHALLLLAHKLMAMISQPAKLLAALIVDCDDRTSEDTFWAKATAYQHSELQGLPTDLMMLKATLYYWRMWQYVCASCVEAVVSIEESAMSLPPKQEARLWTSLLQKRSAASISPPLEDKCSDALSEGMILSGGSGMVKRSRINRKSNEFLIAWFLAHKDNPYPSPDERVEIAEKTGLAEQQVRNWFANMRKRHWKPNRANTKKPRCLVDYMLRQTDA	GMVKRSRINRKSNEFLIAWFLAHKDNPYPSPDERVEIAEKTGLAEQQVRNWFANMRKRHWKPN
Oomycota	Pythiales	Phytophthora sojae	Pso	544363	PHYSODRAFT_544363		nd	EGZ18784.1	NCBI	MEPPSHARLVAMRLLTASNTPERPAAMSSKAAQLCLSPTDPSEDPATMALAMASPVLTGKPAPVTSPNPAKNPLPGLQFAISAQRAPARELRLPSFSSTSYELESATPAASSADEEEMSSQQQMQQQQQEKSAAQRRKKGTRRGTLHPEAKNVLKAWMFSPEHFAHPYPSEEEKEELANEAGIEVKQLSNWFTNARKRLWQPVLRQSGVEVKNFLSTGRGGPRGNKLDVPANIHQLVSPSPVPSPPSSPRKRSWSAMHSSPASVDDSKRRKSSAARKRSKASASNANDENPIPQLQDLELLAATSLLGLQHLTQSVH	TRRGTLHPEAKNVLKAWMFSPEHFAHPYPSEEEKEELANEAGIEVKQLSNWFTNARKRLWQPV
Oomycota	Pythiales	Phytophthora sojae	Pso	484958	PHYSODRAFT_484958		nd	EGZ23713.1	NCBI	MMTAQQQSTDQVKPTFAYPHATPAAAVDVAPSSSAAAAASESSSAIPTDDAGAKGSADTSDTDKNKEQQPQQPSKKSRRELPPHTVAILKGWMLSREHVKHPYPTDEDKQMLLKKTGISMKQLTNWFTNARKRIWKPMMRREHSRQLQSAMEFDHTAVREFPGAGLSQQYADSSYAPRPTVRHSFDAGSLGAPPHAAAANFDRYARPQAFPVNAPMCPPRAVRSMSEAPARTDVDDYLDAERIRERVLERGHDNHAPRNSLSPRGHKILQEWVNANARREYPYPSDTERLQLARDTGLDVSQVDGWVTSLREQMGATPVRAVSSIPSAGNPAFPPPPAYGERRSIPTSGNPMFPPRPTAPSSMRPSIPSAGNPQFPPPPARREATDSRFPPFPSAASHY…	KSRRELPPHTVAILKGWMLSREHVKHPYPTDEDKQMLLKKTGISMKQLTNWFTNARKRIWKPM	APRNSLSPRGHKILQEWVNANARREYPYPSDTERLQLARDTGLDVSQVDGWVTSLREQMGATP
Oomycota	Pythiales	Phytophthora sojae	Pso	469217	PHYSODRAFT_469217		nd	EGZ27148.1/XP_009514423.1	NCBI	MEAVSMQTMGHAAQVLGDPNVAAQYEHSGRTMHAWGKRRMTQQHQQVSSAGRGGNNLLPSLSAISLSQVSPYAMELAARNSMPKKRSSLSKRSKQLMHEWFEHNLHHPYPTEEEKEWLAQEGGITLEQVNNWFINTRGRKWKPMLNKLMAEKQAGNCKLYDQMVQKIEEPYHKL	MPKKRSSLSKRSKQLMHEWFEHNLHHPYPTEEEKEWLAQEGGITLEQVNNWFINTRGRKWKPM
Oomycota	Pythiales	Phytophthora sojae	Pso	308607	PHYSODRAFT_308607		nd	EGZ27228.1	NCBI	MTLPIRTSSYRLRSREKSQQADAELTARDAPVDAPFAALRHETPVVEAKLESAALFSPSSTSVMQGHALLQLTHKLMAMIAQPAKLLAALVADCGERTSKQTFWLRATAYQHAELRGLDDAWCGIVEEPDRYELGPTDVMLLKAALYYWRLWQYVCILCVDAVARIEDTAMQQQQPQTQPRQEPKQWTSLLQKREAPSISPSFEDRCSDALSQGMVLSGPGLAKRSRITKRSNEFLVAWFLAHKDNPYPSSEERTEIAEKTGLAEQQVRNWFANMRKRHWKPNRTNAKKPRCLLDYVLRQTEA	GLAKRSRITKRSNEFLVAWFLAHKDNPYPSSEERTEIAEKTGLAEQQVRNWFANMRKRHWKPN
Oomycota	Saprolegniales	Saprolegnia diclina	Sdi	SDRG_04313	SDRG_04313		nd	EQC38612	NCBI	MTLPNVSAYTPRPSASRAAASPLPVLAPSPAAILALVRDHPLYGLLQRVFVLLETPPEAATAQPSLPSKRELAKLIAQAQAPTHAIVTPTLLVFLTLQLRMLRYFEVVLQARGRRFSSSADSSPTHKASDDDDATMLEDEKKLKRARLTRRSNEFMTAWFLAHKGNPYPSAKERNEIASTTQLSELQVRNWFANMRKRHWKPQNSDKKPRCLLDLVLRRSSP	KKLKRARLTRRSNEFMTAWFLAHKGNPYPSAKERNEIASTTQLSELQVRNWFANMRKRHWKPQ
Oomycota	Saprolegniales	Saprolegnia diclina	Sdi	SDRG_04312	SDRG_04312		nd	EQC38611; T0QVB7_9STRA	NCBI; Uniprot	MTLPNHRPPAPPSAPDSPLTAAADALSFGSDGSRDYEDATADTLLGPTTSITDDIASTLTHLAGDPVWAAMAPLFAPHMTDLLRASSTKDARATKCLEELKMVLATPSGTTRDLCDRYTAALDQALEASPPTHKAAKKRTNLSKVAKRVLRTWFDAHFHHPYPTDEEKEVLSAQGGITIEQVNNWFINTRVREWKPKLHQILAENAAGNTHTLDAMLDKVKEPYKL	AAKKRTNLSKVAKRVLRTWFDAHFHHPYPTDEEKEVLSAQGGITIEQVNNWFINTRVREWKPK
Oomycota	Saprolegniales	Saprolegnia diclina	Sdi	T0PRG7	T0PRG7		nd	EQC28079.1; T0PRG7_9STRA	NCBI; Uniprot	MTTTMLVEEQKQAAASPRVKDEVGHDDDDGGSSDEKDHDENTAPGDVRKPRRELPPATVAILKTWMLSPEHVKHPYPTDEDKKMLLEKTGINMKQLTNWFTNARKRIWKPMMRREHSRQLQSSFARDVQLREGGPRIPPPPFAHDRPTDDMRDGHAPLRMAHHGGHAPDHPFSHPNDPYQGYPPPTDPRSFHHLLERRVPEYPARSHEYPPVAFPPPSGAFFEPRSHRSVSESVVDRLHHHQHPQHHRVHHPYAAPHHPIPSSFLRLPPRNERSASDASTHKPSPPLKRELDAKDDDSNGKEKRARRSSLLPPHVIRILKDWMMSPEHLEHPYPTDVEKKALCDETGLDMCQLNNWFANNRKRLWKPTMANRSKERLQLYSNESIRSIIYNGKQAGEAP…	RARRSSLLPPHVIRILKDWMMSPEHLEHPYPTDVEKKALCDETGLDMCQLNNWFANNRKRLWKPT
Oomycota	Peronosporales	Albugo laibachii	Ala	17720	ALNC14_017720		nd	CCA15629.1	NCBI	MMEDNILNVSTDPDNNSASPLAESNLTPAYVAKMSPSLNAASHRHYSSSQAVSPLPLHLNREPANQLSIAGTMEQICINDASLSPQPCSNPGKICINDASLSPQQPCTNPDQSKKTDSLERTSEDSPTNTHINEVDTVDDSMQSSSETSQSLNNCKKARRELPPQTVALLKGWMLSPEHIKHPYPTDADKQILLKQTGLNMKQLTNWFTNARKRIWKPMMRQQQTKSMHDLAQFDTPFGPGPINVHRREPFRHFCGDKVYASNFVAPFESSNSIRQTFQPEVDQTRYSLNRGHCPPRNIRSMSESATANGWAALEYQQQCLRKRTYLQMGEQETVEREKRNCHSHVLPVRAVKILTDWVQSKLHSSSSLLPSSLYPTEAEILNFARQFDVSPSSIERWF…	KARRELPPQTVALLKGWMLSPEHIKHPYPTDADKQILLKQTGLNMKQLTNWFTNARKRIWKPM
Oomycota	Peronosporales	Albugo laibachii	Ala	36870	ALNC14_036870		nd	CCA17544.1	NCBI	MTFPNRFNYKFVLHHQRHERSNYKRQLASRDRITIQLGDFDLETAGDCKKSQVDPSQAIMDHNTPSPCVPDLRDNDDPISPFSLFGDETDASCSLDETLSCKNSDENCQLFLMSANGSNSEVNALVGRHFLLPFIRKLQWMSMNPSCLFGVLFQVAVEAWGYRLPSKVSKSQSNAQRPKQFVTLESVARKYQNRHLNSICLSLLESLKNERSNPSASIDAKAGHMMKVTALYYWNLWQSIVALCIDAVRRIQRVMSEIQKASIKTLDKRRVASISPMFENKSSDKVAHHMLGSEDDFPFSLGMGKRPRLARQSNEFMRGWFLAHKANPYPNAAERASIAERTGLSEQQVRNWFANMRKRHWKPSTIPNKRPRCFVDVVMRKNGL	GMGKRPRLARQSNEFMRGWFLAHKANPYPNAAERASIAERTGLSEQQVRNWFANMRKRHWKPS
Oomycota	Peronosporales	Albugo laibachii	Ala	70290	ALNC14_070290		nd	CCA20886.1	NCBI	MSNASTTYSNFMFSIAASTPSSPPNQTTFLNRPDAQPVSGPAHCILTNAPNEPYTVYTTAPSECETPHSTSQSKPRSCPLTSPNVKLIAPPKHSTLRSSKLHSNDASFKKKGTRRGTLNARAKNILKAWMFSPEHFIHPYPNEEEKEKLANETGIDMKQLSNWFTNARKRLWQPVLRQSGVEVKRFLSTGRGGPRGGNPSLDLPTQANTCPIPLQTPAHCDSSSIQDTTPNSDHSDEPVIDVSPPSITPNQSFSHVVTPHTENHISSFTHVQTANSDRATMTTLYVQTPNPDNRMEWSNSAPKLAWSPDSGINILNRKHKRPLTRPLAPISELISRNEMDLEPRNPQIHSLDLAECFSTHRSNTSQVRKNENCDRFQDLEVLAVCSLLRLNQPSIPVSH…	TRRGTLNARAKNILKAWMFSPEHFIHPYPNEEEKEKLANETGIDMKQLSNWFTNARKRLWQPV
Oomycota	Peronosporales	Albugo laibachii	Ala	90460	ALNC14_090460		nd	CCA22903.1, F0WNL2_9STRA	NCBI	MTLPNRINYKSGSMRRDRSQREDDNAEDVCSDDMSLSGPVEKEDDDTEIDFQLHQILSFVLDEEEDLEESGGCLPTMELQAAAQEARDDVIHEQAHGDFNSLDRSLIWSFSHCNLLAEEPDLISLEALKQTFKAEKDGADSPNETSQSLSDDSSARSMLSDALKSQPGLVGSMERYQQQYEGEAFNKFEQVLHMINDQSVTLRYRHAIRDLHQLARAVSLRHTDSTGSPWDDLSSSALGILEGHAWSSASANAPTSPSMDCGRGCKKRTNLSKTAKQVLQQWFEEHLHHPYPTEEEKDMLAMQGGITIEQVNNWFINTRGRKWKPMLMRLVAQKEAGVECKLLDQMRERLEEPYRRSPS	GCKKRTNLSKTAKQVLQQWFEEHLHHPYPTEEEKDMLAMQGGITIEQVNNWFINTRGRKWKPM
