# Supplementary material for: Convergent recruitment of TALE homeodomain life cycle regulators to direct sporophyte development in land plants and brown algae
Source: eLife. 2019 Jan 15;8:e43101. doi: 10.7554/eLife.43101 (PMC6368402; doi:10.7554/eLife.43101)
Supplement: Supplementary file 7. [file elife-43101-supp7.xlsx]

## Sheet: Table S7. SSR markers
Supplementary Table S7. New microsatellite markers developed to map the ORO gene.
See Heesch et al. (2010) for previously published microsatellite markers used in this study.
*The M13 extension on the forward primers is shown in lower case.
Marker	Super contig	Primer	Primer sequence (5’-3’)*	Tm (°C)	Product Size (bp)
M_63_3	sctg_063	M_63_3AF	tgtaaaacgacggccagtGGCAAGAGGGTGTATGTTT	55.04	366
		M_63_3AR	CGACAAGTGAGAGCAGTAGA	54.14
M_63_5	sctg_063	M_63_5AF	tgtaaaacgacggccagtATCTTTGGTGCTGGTCGG	59.63	234
		M_63_5AR	AGTAAGTGTGGATGGCTTTG	55.32
M_133_13	sctg_133	M_133_13AF	tgtaaaacgacggccagtAGGCTCCAACAACAACAG	54.49	400
		M_133_13AR	ATAGAAACCTCAACAGCAAAC	53.73
M_133_15	sctg_133	M_133_15AF	tgtaaaacgacggccagtATGGGACCTTCTCTGTATTTC	55.89	202
		M_133_15AR	GCCTGTGGGTGACTTCTT	54.87
M_133_28	sctg_133	M_133_28AF	tgtaaaacgacggccagtAGTTCTTCCGAGAGGTTGAG	61.14	265
		M_133_28AR	CTACAGGTTTCACAGCAGG	55.04
M_133_29	sctg_133	M_133_29AF	tgtaaaacgacggccagtGAGGATGAAGTAGACGCAAG	53.69	218
		M_133_29AR	ATCAGAAGGAACACACTCAAA	55.69
M_133_30	sctg_133	M_133_30AF	tgtaaaacgacggccagtGTAGATAGTGCGACCGAGAG	55.94	393
		M_133_30AR	GAGTCATCAGTTCCCTTACAC	54.71
M_133_33	sctg_133	M_133_33AF	tgtaaaacgacggccagtGTGTTCTCATCCTTGTGTGTT	54.78	322
		M_133_33AR	CAGTCATCCCTACTTTGGTG	55.29
M_133_49	sctg_133	M_133_49AF	tgtaaaacgacggccagtAGTTCAAGACACGGACAGAA	56.31	400
		M_133_49AR	CATCGCCACTAAGGGTAAG	55.42
M_133_51	sctg_133	M_133_51AF	tgtaaaacgacggccagtAAGAAGACCAAACATCACTCA	55.23	322
		M_133_51AR	AGTCGGGAACTAAACTTGAAC	56.08
M_133_103	sctg_133	M_133_103F	tgtaaaacgacggccagtAGTTTCGGGTATTAGAAGGC	54.45	330
		M_133_103R	GTACGCAAGGAAGTAAGCAC	55.03
M_133_107	sctg_133	M_133_107F	tgtaaaacgacggccagtGTGAAGACAACAACAACCCT	54.45	369
		M_133_107R	GTACGTGTGCTCCTTTTCTC	55.03
References
Heesch, S., Cho, G.Y., Peters, A.F., Le Corguillé, G., Falentin, C., Boutet, G., Coëdel, S., Jubin, C., Samson, G., Corre, E., et al. (2010). A sequence-tagged genetic map for the brown alga Ectocarpus siliculosus provides large-scale assembly of the genome sequence. New Phytol 188, 42–51.
