# Supplementary material for: Convergent recruitment of TALE homeodomain life cycle regulators to direct sporophyte development in land plants and brown algae
Source: eLife. 2019 Jan 15;8:e43101. doi: 10.7554/eLife.43101 (PMC6368402; doi:10.7554/eLife.43101)
Supplement: Supplementary file 8. [file elife-43101-supp8.xlsx]

## Sheet: Table S8. RT-PCR primers
Supplementary Table S8. Oligonucleotides used for the qRT-PCR analysis.
F, forward primer; R, reverse primer.
LocusID	Oligonucleotide sequence (5’-3’)	Comment
Ec-23_004240	F: AAGAATAGTGGGGAGGTGAGCG	Gametophyte marker gene IUP2 (Peters et al. 2008)
	R: ACTGCACCAAGGAAGAAATGAAAA
Ec-21_006530	F: AAGACATCGCCTAAAGCCTCG	Gametophyte marker gene IUP7 (Peters et al. 2008)
	R: TGTGACCCAATCCCCAAGAAT
Ec-20_001150	F: TGCGAGATTCTTTTTGTGGTATGT	Sporophyte marker gene IDW6 (Peters et al. 2008)
	R: TCAAACCAAAATACCGATCCTCA
Ec-26_000310	F: CGTTGAATCTGGCTGCATGG	Sporophyte marker gene IDW7 (Peters et al. 2008)
	R: TGCCACATGAACTGCCACTAAC
Ec-21_002980	F: CAAGTCCGTCGAGAAGAAGG	Reference gene: EUKARYOTIC TRANSLATION ELONGATION FACTOR1a (EEF1A2)
	R: CCAGCAACACCACAATGTCT
Ec-27_006660	F: TCCTGACAGAGTGGTTTCTGG	DNA contamination control: amplification product spans intron 2 of SAM
	R: GCGACCTCGTTCGTTTCTT
References
Peters, A.F., Scornet, D., Ratin, M., Charrier, B., Monnier, A., Merrien, Y., Corre, E., Coelho, S.M., and Cock, J.M. (2008). Life-cycle-generation-specific developmental processes are modified in the immediate upright mutant of the brown alga Ectocarpus siliculosus. Development 135, 1503–1512.
