# Supplementary material for: Convergent recruitment of TALE homeodomain life cycle regulators to direct sporophyte development in land plants and brown algae
Source: eLife. 2019 Jan 15;8:e43101. doi: 10.7554/eLife.43101 (PMC6368402; doi:10.7554/eLife.43101)
Supplement: Supplementary file 9. [file elife-43101-supp9.xlsx]

## Sheet: Table S9. RNA-seq data
Supplementary Table S9. Ectocarpus RNA-seq data used in this study.
Species	Strain	Life cycle generation	Sex and/or stage	Wild type or mutant	Library	Sequencing strategy	Raw reads	Cleaned reads	Sequence Read Archive accession number	Reference
Ectocarpus sp.	Pooled meiotic progeny of Ec566 with Imm- phenotype	Partheno-sporophyte	Entire thallus	imm	GBP-3	Hiseq 2000, 1 x 100 bp	22,699,207	22,542,555	SRR3108628	Macaisne et al., 2017
					GBP-4	Hiseq 2000, 1 x 100 bp	29,628,602	29,471,031	SRR3108629	Macaisne et al., 2017
	Pooled meiotic progeny of Ec566 with wild type phenotype		Entire thallus	Wild type	GBP-7	Hiseq 2000, 1 x 100 bp	37,221,214	37,018,065	SRR3108630	Cormier et al., 2017
					GBP-8	Hiseq 2000, 1 x 100 bp	29,670,293	29,491,668	SRR3108631	Cormier et al., 2017
	Ec32		Basal system		GBP-16	Hiseq 2000, 1 x 100 bp	35,017,809	34,355,456	SRR3108632	Cormier et al., 2017
					GBP-17	Hiseq 2000, 1 x 100 bp	32,818,363	32,207,868	SRR3108633	Cormier et al., 2017
			Upright filaments		GBP-18	Hiseq 2000, 1 x 100 bp	32,080,985	31,431,264	SRR3108626	Cormier et al., 2017
					GBP-19	Hiseq 2000, 1 x 100 bp	34,753,366	34,100,415	SRR3108627	Cormier et al., 2017
		Gametophye	Entire thallus		GBP-5	Hiseq 2000, 1 x 100 bp	26,275,116	26,152,138	SRR5241401	This study
					GBP-6	Hiseq 2000, 1 x 100 bp	34,280,796	34,080,576	SRR5241402	This study
	Ec603		Entire mature male		GPO-1	Hiseq 2000, 1 x 100 bp	25,119,067	22,428,865	SRR1166429	Ahmed et al., 2014
					GPO-2	Hiseq 2000, 1 x 100 bp	26,873,490	23,642,187	SRR1166430	Ahmed et al., 2014
	Ec602		Entire mature female		GPO-3	Hiseq 2000, 1 x 100 bp	21,005,896	18,668,732	SRR1166441	Ahmed et al., 2014
					GPO-4	Hiseq 2000, 1 x 100 bp	32,150,185	28,667,939	SRR1166452	Ahmed et al., 2014
	Ec603		Entire immature male		GBP-24	Hiseq 2000, 1 x 100 bp	80,602,259	78,459,187	SRR1660829	Lipinska et al., 2015
					GBP-25	Hiseq 2000, 1 x 100 bp	85,602,259	83,125,361	SRR1660830	Lipinska et al., 2015
	Ec602		Entire immature female		GBP-22	Hiseq 2000, 1 x 100 bp	75,827,247	73,723,385	SRR1660827	Lipinska et al., 2015
					GBP-23	Hiseq 2000, 1 x 100 bp	93,562,945	90,903,680	SRR1660828	Lipinska et al., 2015
	Ec494	Partheno-gametophye	Entire mature male	oro	GPO-32	Hiseq 2000, 2 x 125 bp	43,272,264	43,272,264	SRR5242540	This study
					GPO-33	Hiseq 2000, 2 x 125 bp	39,872,122	39,872,122	SRR5242545	This study
	Ec374			sam-1	GPO-30	Hiseq 2000, 2 x 125 bp	33,804,060	33,804,060	SRR5242538	This study
					GPO-31	Hiseq 2000, 2 x 125 bp	33,635,474	33,635,474	SRR5242539	This study
Ectocarpus species 4 (Stache-Crain et al. 1997)	NZKU32-22-21	Gametophye	Female gamete	Wild type	GPO-47	Hiseq 2000, 2 x 125 bp	77,154,180	36,079,209	SRR5242548	This study
					GPO-48	Hiseq 2000, 2 x 125 bp	69,727,918	32,475,895	SRR5242549	This study
	NZKU1_3		Male gamete		GPO-49	Hiseq 2000, 2 x 125 bp	80,290,156	37,796,774	SRR5242551	This study
					GPO-50	Hiseq 2000, 2 x 125 bp	74,001,348	34,921,943	SRR5242552	This study
References
Ahmed, S., Cock, J.M., Pessia, E., Luthringer, R., Cormier, A., Robuchon, M., Sterck, L., Peters, A.F., Dittami, S.M., Corre, E., et al. (2014). A Haploid System of Sex Determination in the Brown Alga Ectocarpus sp. Curr Biol 24, 1945–1957.
Cormier, A., Avia, K., Sterck, L., Derrien, T., Wucher, V., Andres, G., Monsoor, M., Godfroy, O., Lipinska, A., Perrineau, M.-M., et al. (2017). Re-annotation, improved large-scale assembly and establishment of a catalogue of noncoding loci for the genome of the model brown alga Ectocarpus. New Phytol. 214, 219–232.
Lipinska, A., Cormier, A., Luthringer, R., Peters, A.F., Corre, E., Gachon, C.M.M., Cock, J.M., and Coelho, S.M. (2015). Sexual dimorphism and the evolution of sex-biased gene expression in the brown alga Ectocarpus. Mol. Biol. Evol. 32, 1581–1597.
Macaisne, N., Liu, F., Scornet, D., Peters, A.F., Lipinska, A., Perrineau, M.-M., Henry, A., Strittmatter, M., Boo, S.M., and Cock, J.M. (2017). The Ectocarpus IMMEDIATE UPRIGHT gene encodes a member of a novel family of cysteine-rich proteins with an unusual distribution across the eukaryotes. Development 409–418.
Stache-Crain, B., Müller, D.G., and Goff, L.J. (1997). Molecular systematics of Ectocarpus and Kuckuckia (Ectocarpales, Phaeophyceae) inferred from phylogenetic analysis of nuclear and plastid-encoded DNA sequences. J Phycol 33, 152–168.
