# Supplementary material for: Convergent recruitment of TALE homeodomain life cycle regulators to direct sporophyte development in land plants and brown algae
Source: eLife. 2019 Jan 15;8:e43101. doi: 10.7554/eLife.43101 (PMC6368402; doi:10.7554/eLife.43101)
Supplement: Supplementary file 10. [file elife-43101-supp10.xlsx]

## Sheet: Table S10. Funct catergories
Supplementary Table S10. Manual functional assignments and Hectar subcellular targeting predictions for all Ectocarpus nucleus-encoded proteins
LocusID	Locus description	GO-labels	Interpro protein domains	KOGid	Manual functional category	Hectar predicted targeting category
Ec-00_000010	Ferric reductase, NAD binding	GO:0016491;GO:0055114	TMhelix: Region of a membrane-bound protein predicted to be embedded in the membrane.; IPR013130: Ferric reductase transmembrane component-like domain; SSF52343: ; CYTOPLASMIC_DOMAIN: Region of a membrane-bound protein predicted to be outside the membrane, in the cytoplasm.; PTHR11972: ; NON_CYTOPLASMIC_DOMAIN: Region of a membrane-bound protein predicted to be outside the membrane, in the extrac…	NA	Metabolism	other localisation
Ec-00_000020	hypothetical protein	n/a;n/a;n/a	NA	NA	Unknown	other localisation
Ec-00_000030	Ankyrin repeat-containing domain	n/a;GO:0005515	IPR020683: Ankyrin repeat-containing domain; PF13637: Ankyrin repeats (many copies); PTHR24133: ; IPR002110: Ankyrin repeat	NA	Membrane function and transporters	other localisation
Ec-00_000050	expressed unknown protein	n/a;n/a;n/a	NA	NA	Unknown	other localisation
Ec-00_000060	hypothetical protein	n/a;n/a;n/a	NA	NA	Unknown	other localisation
Ec-00_000070	telomerase reverse transcriptase	n/a;n/a;n/a	PTHR12066:	NA	RNA modification or binding	other localisation
Ec-00_000080	FAR1 DNA binding domain	n/a;GO:0006355	IPR004330: FAR1 DNA binding domain; IPR018289: MULE transposase domain; IPR031052: FHY3/FAR1 family	NA	Transcription	other localisation
Ec-00_000090	expressed unknown protein	n/a;n/a;n/a	NA	NA	Unknown	other localisation
Ec-00_000110	Ammonium/urea transporter	GO:0006810;GO:0008519;GO:0015696;GO:0016020;GO:0055085;GO:0072488;n/a	NA	NA	Membrane function and transporters	signal peptide
Ec-00_000120	Hypothetical protein	n/a;n/a;n/a	NA	NA	Unknown	other localisation
Ec-00_000130	Hypothetical protein	n/a;n/a;n/a	NON_CYTOPLASMIC_DOMAIN: Region of a membrane-bound protein predicted to be outside the membrane, in the extracellular region; SIGNAL_PEPTIDE: Signal peptide region; SIGNAL_PEPTIDE_N_REGION: N-terminal region of a signal peptide.; Coil: ; SIGNAL_PEPTIDE_H_REGION: Hydrophobic region of a signal peptide.; SIGNAL_PEPTIDE_C_REGION: C-terminal region of a signal peptide.	NA	Unknown	other localisation
Ec-00_000140	BRCT domain	GO:0005622	IPR001357: BRCT domain	NA	Unknown	other localisation
Ec-00_000150	Ankyrin repeat-containing domain	n/a;n/a;n/a	IPR020683: Ankyrin repeat-containing domain; Coil:	NA	Membrane function and transporters	other localisation
Ec-00_000160	Methylthiotransferase, N-terminal	GO:0003824;GO:0009451;GO:0051539	SSF102114: ; IPR020612: Methylthiotransferase, conserved site; IPR023970: Methylthiotransferase/radical SAM-type protein; IPR023404: Radical SAM, alpha/beta horseshoe; IPR013848: Methylthiotransferase, N-terminal	NA	Metabolism	other localisation
Ec-00_000170	expressed unknown protein	n/a;n/a;n/a	NA	NA	Unknown	mitochondrion
Ec-00_000180	Protein of unknown function DUF963	n/a;n/a;n/a	IPR009306: Protein of unknown function DUF963	NA	Unknown	other localisation
Ec-00_000190	hypothetical protein	n/a;n/a;n/a	NA	NA	Unknown	other localisation
Ec-00_000200	ATPase, V1 complex, subunit H, C-terminal	GO:0000221;GO:0005488;GO:0015991;GO:0016820	IPR011987: ATPase, V1 complex, subunit H, C-terminal; IPR004908: ATPase, V1 complex, subunit H; IPR016024: Armadillo-type fold; PTHR10698:	NA	Membrane function and transporters	other localisation
Ec-00_000210	Cyclin-like	n/a;n/a;n/a	PTHR14248: ; IPR013763: Cyclin-like; IPR006671: Cyclin, N-terminal	NA	Cell cycle	other localisation
Ec-00_000230	conserved unknown protein	n/a;n/a;n/a	PTHR22753:	NA	Unknown	other localisation
Ec-00_000240	expressed unknown protein	n/a;n/a;n/a	NA	NA	Unknown	other localisation
Ec-00_000260	Protein kinase domain	GO:0004672;GO:0005524;GO:0006468	IPR000719: Protein kinase domain; G3DSA:3.30.200.20: ; G3DSA:1.10.510.10: ; PTHR24361: ; PTHR24361:SF423: ; cd00180: PKc; IPR011009: Protein kinase-like domain	NA	Cellular regulation and signalling	other localisation
Ec-00_000280	Hypothetical protein	n/a;n/a;n/a	NA	NA	Unknown	other localisation
Ec-00_000290	hypothetical protein	n/a;n/a;n/a	NA	NA	Unknown	other localisation
Ec-00_000300	hypothetical protein	n/a;n/a;n/a	NA	NA	Unknown	other localisation
Ec-00_000310	hypothetical protein	n/a;n/a;n/a	Coil:	NA	Unknown	other localisation
Ec-00_000320	Glutathione S-transferase	n/a;n/a;n/a	PTHR11571: ; IPR010987: Glutathione S-transferase, C-terminal-like; IPR004046: Glutathione S-transferase, C-terminal	KOG1695	Redox	other localisation
Ec-00_000330	expressed unknown protein	n/a;n/a;n/a	NA	NA	Unknown	other localisation
Ec-00_000340	EsV-1-164	n/a;n/a;n/a	IPR011050: Pectin lyase fold/virulence factor; IPR012334: Pectin lyase fold; SignalP-TM:	NA	Transposon or viral gene	other localisation
Ec-00_000350	HRDC domain	GO:0005622;GO:0003676	CYTOPLASMIC_DOMAIN: Region of a membrane-bound protein predicted to be outside the membrane, in the cytoplasm.; NON_CYTOPLASMIC_DOMAIN: Region of a membrane-bound protein predicted to be outside the membrane, in the extracellular region; IPR010997: HRDC-like; TMhelix: Region of a membrane-bound protein predicted to be embedded in the membrane.; IPR002121: HRDC domain; TRANSMEMBRANE: Region of a m…	NA	RNA modification or binding	mitochondrion
Ec-00_000360	expressed unknown protein	GO:0005549;GO:0006810	NA	NA	Unknown	other localisation
Ec-00_000370	expressed unknown protein	n/a;n/a;n/a	Coil:	NA	Unknown	other localisation
Ec-00_000380	Protein kinase-like domain	GO:0016772	G3DSA:3.30.200.20: ; IPR011009: Protein kinase-like domain	NA	Cellular regulation and signalling	other localisation
Ec-00_000390	hypothetical protein	n/a;n/a;n/a	NA	NA	Unknown	other localisation
Ec-00_000400	expressed unknown protein	n/a;n/a;n/a	NA	NA	Unknown	other localisation
Ec-00_000410	RNA-binding protein Lupus La	GO:0006396;GO:0005634;GO:0003723;GO:0030529	IPR006630: RNA-binding protein Lupus La; IPR011991: Winged helix-turn-helix DNA-binding domain; SSF46785: ; IPR002344: Lupus La protein; PTHR22792:	NA	RNA modification or binding	other localisation
Ec-00_000430	expressed unknown protein	n/a;n/a;n/a	NA	NA	Unknown	other localisation
Ec-00_000440	Metalloenzyme, LuxS/M16 peptidase-like	GO:0003824;GO:0046872	PTHR11851: ; IPR011249: Metalloenzyme, LuxS/M16 peptidase-like; IPR011237: Peptidase M16 domain	NA	Proteolysis	other localisation
Ec-00_000450	hypothetical protein	n/a;n/a;n/a	NA	NA	Unknown	other localisation
Ec-00_000500	hypothetical protein	n/a;n/a;n/a	NA	NA	Unknown	other localisation
Ec-00_000510	Cyclic nucleotide-binding-like	n/a;n/a;n/a	IPR018490: Cyclic nucleotide-binding-like; Coil:	NA	Cellular regulation and signalling	other localisation
Ec-00_000520	hypothetical protein, putative	n/a;n/a;n/a	CYTOPLASMIC_DOMAIN: Region of a membrane-bound protein predicted to be outside the membrane, in the cytoplasm.; NON_CYTOPLASMIC_DOMAIN: Region of a membrane-bound protein predicted to be outside the membrane, in the extracellular region; TMhelix: Region of a membrane-bound protein predicted to be embedded in the membrane.; TRANSMEMBRANE: Region of a membrane-bound protein predicted to be embedded…	NA	Unknown	other localisation
Ec-00_000530	Myb transcription factor	NA	PTHR10641: ; IPR009057: Homeodomain-like; IPR017930: Myb domain	NA	Transcription	other localisation
Ec-00_000540	expressed unknown protein	n/a;n/a;n/a	NA	NA	Unknown	other localisation
Ec-00_000550	N-acetylglucosaminyl transferase component	GO:0006506;GO:0017176;GO:0016021	CYTOPLASMIC_DOMAIN: Region of a membrane-bound protein predicted to be outside the membrane, in the cytoplasm.; NON_CYTOPLASMIC_DOMAIN: Region of a membrane-bound protein predicted to be outside the membrane, in the extracellular region; TMhelix: Region of a membrane-bound protein predicted to be embedded in the membrane.; PTHR21329: ; IPR007720: N-acetylglucosaminyl transferase component; TRANSM…	NA	Metabolism	other localisation
Ec-00_000560	hypothetical protein	n/a;n/a;n/a	NON_CYTOPLASMIC_DOMAIN: Region of a membrane-bound protein predicted to be outside the membrane, in the extracellular region; SIGNAL_PEPTIDE: Signal peptide region; SIGNAL_PEPTIDE_N_REGION: N-terminal region of a signal peptide.; SIGNAL_PEPTIDE_H_REGION: Hydrophobic region of a signal peptide.; SIGNAL_PEPTIDE_C_REGION: C-terminal region of a signal peptide.	NA	Unknown	other localisation
Ec-00_000570	conserved unknown protein	GO:0003883;GO:0006221	NA	NA	Unknown	other localisation
Ec-00_000580	hypothetical protein	n/a;n/a;n/a	NON_CYTOPLASMIC_DOMAIN: Region of a membrane-bound protein predicted to be outside the membrane, in the extracellular region; SIGNAL_PEPTIDE: Signal peptide region; SIGNAL_PEPTIDE_N_REGION: N-terminal region of a signal peptide.; SIGNAL_PEPTIDE_H_REGION: Hydrophobic region of a signal peptide.; SIGNAL_PEPTIDE_C_REGION: C-terminal region of a signal peptide.	NA	Unknown	other localisation
Ec-00_000590	expressed unknown protein	n/a;n/a;n/a	NA	NA	Unknown	other localisation
Ec-00_000600	hypothetical protein	n/a;n/a;n/a	NA	NA	Unknown	other localisation
Ec-00_000620	hypothetical protein	n/a;n/a;n/a	NA	NA	Unknown	other localisation
Ec-00_000625	hypothetical protein	NA	mobidb-lite: consensus disorder prediction	NA	Unknown	other localisation
Ec-00_000630	Protein kinase domain	GO:0004672;GO:0005524;GO:0006468	IPR000719: Protein kinase domain; PTHR26392: ; IPR002290: Serine/threonine/dual specificity protein kinase, catalytic domain; G3DSA:3.30.200.20: ; G3DSA:1.10.510.10: ; IPR011009: Protein kinase-like domain; IPR008271: Serine/threonine-protein kinase, active site	NA	Cellular regulation and signalling	other localisation
Ec-00_000640	conserved unknown protein	GO:0005524;GO:0006298;GO:0030983	NA	NA	Unknown	other localisation
Ec-00_000650	Zinc finger, RING-type	GO:0005515;GO:0008270	IPR001841: Zinc finger, RING-type; SSF57850: ; IPR013083: Zinc finger, RING/FYVE/PHD-type	NA	Proteolysis	nd
Ec-00_000660	Hypothetical protein	n/a;n/a;n/a	NA	NA	Unknown	other localisation
Ec-00_000670	Protein disulphide isomerase	GO:0045454	PTHR18929: ; IPR012336: Thioredoxin-like fold; IPR013766: Thioredoxin domain; IPR017937: Thioredoxin, conserved site	NA	Protein binding or modification	other localisation
Ec-00_000680	F-box domain	GO:0005515	IPR001810: F-box domain; Coil:	NA	Proteolysis	other localisation
Ec-00_000690	hypothetical protein	n/a;n/a;n/a	NA	NA	Unknown	other localisation
Ec-00_000710	hypothetical protein	n/a;n/a;n/a	NA	NA	Unknown	other localisation
Ec-00_000720	ferredoxin-dependent glutamate synthase,	GO:0006537;GO:0003824;GO:0055114;GO:0015930;GO:0016638	PTHR11938: ; IPR013785: Aldolase-type TIM barrel; IPR002932: Glutamate synthase domain; SSF51395:	KOG0399	Metabolism	other localisation
Ec-00_000730	Protein kinase-like domain	GO:0006468;GO:0004672;GO:0016772	IPR000719: Protein kinase domain; G3DSA:1.10.510.10: ; PTHR24362: ; IPR008271: Serine/threonine-protein kinase, active site; IPR011009: Protein kinase-like domain	NA	Cellular regulation and signalling	other localisation
Ec-00_000740	Hypothetical protein	n/a;n/a;n/a	CYTOPLASMIC_DOMAIN: Region of a membrane-bound protein predicted to be outside the membrane, in the cytoplasm.; NON_CYTOPLASMIC_DOMAIN: Region of a membrane-bound protein predicted to be outside the membrane, in the extracellular region; TMhelix: Region of a membrane-bound protein predicted to be embedded in the membrane.; TRANSMEMBRANE: Region of a membrane-bound protein predicted to be embedded…	NA	Unknown	nd
Ec-00_000750	hypothetical protein	n/a;n/a;n/a	NA	NA	Unknown	other localisation
Ec-00_000760	hypothetical protein	n/a;n/a;n/a	NA	NA	Unknown	nd
Ec-00_000770	hypothetical protein	n/a;n/a;n/a	NA	NA	Unknown	other localisation
Ec-00_000780	cupin-like protein	GO:0045735	SIGNAL_PEPTIDE: Signal peptide region; IPR006045: Cupin 1; SIGNAL_PEPTIDE_N_REGION: N-terminal region of a signal peptide.; SignalP-TM: ; SIGNAL_PEPTIDE_C_REGION: C-terminal region of a signal peptide.; PTHR31238: ; NON_CYTOPLASMIC_DOMAIN: Region of a membrane-bound protein predicted to be outside the membrane, in the extracellular region; SignalP-noTM: ; IPR011051: RmlC-like cupin domain; IPR014…	NA	Unknown	signal peptide
Ec-00_000790	Glycosyltransferase, DXD sugar-binding motif	n/a;n/a;n/a	IPR029044: Nucleotide-diphospho-sugar transferases; PTHR32385: ; IPR007577: Glycosyltransferase, DXD sugar-binding motif	NA	Metabolism	other localisation
Ec-00_000800	hypothetical protein	n/a;n/a;n/a	NA	NA	Unknown	other localisation
Ec-00_000810	hypothetical protein	n/a;n/a;n/a	NA	NA	Unknown	other localisation
Ec-00_000820	Glycosyl transferase, family 48	GO:0016020;GO:0006075;GO:0003843;GO:0000148	PTHR12741: ; IPR003440: Glycosyl transferase, family 48	NA	Metabolism	other localisation
Ec-00_000830	expressed unknown protein	GO:0009055;GO:0006118;GO:0051536	IPR017896: 4Fe-4S ferredoxin-type, iron-sulphur binding domain; IPR017900: 4Fe-4S ferredoxin, iron-sulphur binding, conserved site	NA	Unknown	nd
Ec-00_000840	Ribosomal protein S5, C-terminal	GO:0003735;GO:0005840;GO:0006412	IPR020568: Ribosomal protein S5 domain 2-type fold; IPR005324: Ribosomal protein S5, C-terminal; IPR014721: Ribosomal protein S5 domain 2-type fold, subgroup	NA	Protein synthesis	other localisation
Ec-00_000850	hypothetical protein	n/a;n/a;n/a	NA	NA	Unknown	other localisation
Ec-00_000860	hypothetical protein	n/a;n/a;n/a	NA	NA	Unknown	other localisation
Ec-00_000870	Carbohydrate-binding WSC	n/a;n/a;n/a	IPR002889: Carbohydrate-binding WSC	NA	Cell wall and extracellular	other localisation
Ec-00_000880	hypothetical protein	n/a;n/a;n/a	PF13450: NAD(P)-binding Rossmann-like domain; G3DSA:3.50.50.60: ; PTHR10742: ; Coil: ; SSF51905:	NA	Unknown	other localisation
Ec-00_000890	CBS domain	n/a;n/a;n/a	G3DSA:3.10.580.10: ; IPR000644: CBS domain; Coil: ; SSF54631: ; PTHR11911:	NA	Cellular regulation and signalling	other localisation
Ec-00_000900	hypothetical protein	n/a;n/a;n/a	CYTOPLASMIC_DOMAIN: Region of a membrane-bound protein predicted to be outside the membrane, in the cytoplasm.; NON_CYTOPLASMIC_DOMAIN: Region of a membrane-bound protein predicted to be outside the membrane, in the extracellular region; TMhelix: Region of a membrane-bound protein predicted to be embedded in the membrane.; TRANSMEMBRANE: Region of a membrane-bound protein predicted to be embedded…	NA	Unknown	other localisation
Ec-00_000910	hypothetical protein	n/a;n/a;n/a	NA	NA	Unknown	other localisation
Ec-00_000920	WLM	n/a;n/a;n/a	IPR013536: WLM; PTHR23153: ; Coil:	NA	Proteolysis	other localisation
Ec-00_000930	conserved unknown protein	GO:0004190;GO:0006508	CYTOPLASMIC_DOMAIN: Region of a membrane-bound protein predicted to be outside the membrane, in the cytoplasm.; NON_CYTOPLASMIC_DOMAIN: Region of a membrane-bound protein predicted to be outside the membrane, in the extracellular region; PF13517: Repeat domain in Vibrio, Colwellia, Bradyrhizobium and Shewanella; TMhelix: Region of a membrane-bound protein predicted to be embedded in the membrane.…	NA	Unknown	other localisation
Ec-00_000940	Purple acid phosphatase, N-terminal	GO:0003993;GO:0046872	IPR029052: Metallo-dependent phosphatase-like; IPR015914: Purple acid phosphatase, N-terminal; IPR004843: Calcineurin-like phosphoesterase domain, apaH type; IPR025733: Iron/zinc purple acid phosphatase-like C-terminal domain; PTHR22953: ; IPR008963: Purple acid phosphatase-like, N-terminal	NA	Metabolism	other localisation
Ec-00_000950	Serine/threonine/dual specificity protein kinase, catalytic domain	GO:0004672;GO:0005524;GO:0006468	IPR017441: Protein kinase, ATP binding site; IPR002290: Serine/threonine/dual specificity protein kinase, catalytic domain; G3DSA:3.30.200.20: ; IPR011009: Protein kinase-like domain; IPR008271: Serine/threonine-protein kinase, active site; IPR002291: Phosphorylase kinase, gamma catalytic subunit; IPR000719: Protein kinase domain; G3DSA:1.10.510.10: ; PTHR24351:	KOG0032	Cellular regulation and signalling	other localisation
Ec-00_000970	SEN1 protein	GO:0005525;GO:0005874;GO:0007017	PTHR10887: ; PF13086: AAA domain; IPR027417: P-loop containing nucleoside triphosphate hydrolase; PF13087: AAA domain	NA	RNA modification or binding	other localisation
Ec-00_000980	CDC50/LEM3 family	GO:0016020	CYTOPLASMIC_DOMAIN: Region of a membrane-bound protein predicted to be outside the membrane, in the cytoplasm.; NON_CYTOPLASMIC_DOMAIN: Region of a membrane-bound protein predicted to be outside the membrane, in the extracellular region; IPR005045: CDC50/LEM3 family; TMhelix: Region of a membrane-bound protein predicted to be embedded in the membrane.; TRANSMEMBRANE: Region of a membrane-bound pr…	NA	Membrane function and transporters	signal anchor
Ec-00_000990	Hypothetical leucine rich repeat protein	GO:0005515	PTHR10588: ; G3DSA:3.80.10.10: ; SSF52058: ; IPR001611: Leucine-rich repeat; IPR025875: Leucine rich repeat 4; SM00365: Leucine-rich repeat, SDS22-like subfamily	NA	Cellular regulation and signalling	other localisation
Ec-00_001000	ATPase family AAA domain-containing protein 3, domain of unknown function DUF3523	GO:0005524;n/a	IPR003959: ATPase, AAA-type, core; IPR003960: ATPase, AAA-type, conserved site; SIGNAL_PEPTIDE: Signal peptide region; PTHR23075: ; IPR027417: P-loop containing nucleoside triphosphate hydrolase; SIGNAL_PEPTIDE_N_REGION: N-terminal region of a signal peptide.; SIGNAL_PEPTIDE_C_REGION: C-terminal region of a signal peptide.; CYTOPLASMIC_DOMAIN: Region of a membrane-bound protein predicted to be ou…	NA	Membrane function and transporters	signal peptide
Ec-00_001020	Zinc finger, TFIIS-type	GO:0003676;GO:0006351;GO:0008270	PTHR11239: ; IPR001222: Zinc finger, TFIIS-type; IPR001529: DNA-directed RNA polymerase, M/15kDa subunit; IPR019761: DNA-directed RNA polymerase M, 15kDa subunit, conserved site; SSF57783: ; G3DSA:2.20.25.10:	NA	Transcription	other localisation
Ec-00_001030	hypothetical protein	n/a;n/a;n/a	CYTOPLASMIC_DOMAIN: Region of a membrane-bound protein predicted to be outside the membrane, in the cytoplasm.; NON_CYTOPLASMIC_DOMAIN: Region of a membrane-bound protein predicted to be outside the membrane, in the extracellular region; TMhelix: Region of a membrane-bound protein predicted to be embedded in the membrane.; TRANSMEMBRANE: Region of a membrane-bound protein predicted to be embedded…	NA	Unknown	other localisation
Ec-00_001040	Ankyrin repeat-containing domain	GO:0005515	PF13637: Ankyrin repeats (many copies); IPR020683: Ankyrin repeat-containing domain; PTHR10489:SF584: ; PTHR10489: ; IPR002110: Ankyrin repeat	NA	Membrane function and transporters	mitochondrion
Ec-00_001070	expressed unknown protein	n/a;n/a;n/a	NA	NA	Unknown	other localisation
Ec-00_001080	GPI inositol-deacylase PGAP1-like	GO:0016788;GO:0006505;GO:0006886	CYTOPLASMIC_DOMAIN: Region of a membrane-bound protein predicted to be outside the membrane, in the cytoplasm.; NON_CYTOPLASMIC_DOMAIN: Region of a membrane-bound protein predicted to be outside the membrane, in the extracellular region; PTHR15495: ; IPR029058: Alpha/Beta hydrolase fold; TMhelix: Region of a membrane-bound protein predicted to be embedded in the membrane.; IPR012908: GPI inositol…	NA	Protein binding or modification	other localisation
Ec-00_001090	Dimeric alpha-beta barrel	n/a;n/a;n/a	G3DSA:3.30.70.900: ; IPR011008: Dimeric alpha-beta barrel	NA	Metabolism	mitochondrion
Ec-00_001100	expressed unknown protein	n/a;n/a;n/a	Coil:	NA	Unknown	other localisation
Ec-00_001110	Regulator of chromosome condensation 1/beta-lactamase-inhibitor protein II	n/a;n/a;n/a	SIGNAL_PEPTIDE: Signal peptide region; SIGNAL_PEPTIDE_N_REGION: N-terminal region of a signal peptide.; SIGNAL_PEPTIDE_C_REGION: C-terminal region of a signal peptide.; SignalP-TM: ; IPR009091: Regulator of chromosome condensation 1/beta-lactamase-inhibitor protein II; NON_CYTOPLASMIC_DOMAIN: Region of a membrane-bound protein predicted to be outside the membrane, in the extracellular region; Sig…	NA	DNA or chromatin modification	signal peptide
Ec-00_001120	Intraflagellar transport protein 43	GO:0030991	IPR029302: Intraflagellar transport protein 43	NA	Cytoskeleton and flagella	other localisation
Ec-00_001130	Mak16 protein	n/a;n/a;n/a	IPR006958: Mak16 protein; Coil: ; PTHR23405: ; IPR029004: Ribosomal L28e/Mak16	NA	Cell cycle	other localisation
Ec-00_001140	WD40/YVTN repeat-like-containing domain	GO:0030130;GO:0016192;GO:0006886;GO:0030132;GO:0005515;GO:0005198	IPR016025: Clathrin, heavy chain, linker/propeller domain; IPR017986: WD40-repeat-containing domain; IPR001680: WD40 repeat; IPR015943: WD40/YVTN repeat-like-containing domain; PTHR10292: ; IPR001473: Clathrin, heavy chain, propeller, N-terminal	NA	Protein binding or modification	other localisation
Ec-00_001150	Protein phosphatase 2C (PP2C)-like domain	GO:0003824;GO:0004722;GO:0006470	IPR001932: PPM-type phosphatase domain; IPR015655: Protein phosphatase 2C	NA	Cellular regulation and signalling	other localisation
Ec-00_001160	Forkhead-associated (FHA) domain	GO:0005515	IPR008984: SMAD/FHA domain; PTHR23308: ; Coil: ; IPR000253: Forkhead-associated (FHA) domain	NA	Cellular regulation and signalling	other localisation
Ec-00_001170	expressed unknown protein	n/a;n/a;n/a	NON_CYTOPLASMIC_DOMAIN: Region of a membrane-bound protein predicted to be outside the membrane, in the extracellular region; TMhelix: Region of a membrane-bound protein predicted to be embedded in the membrane.; SignalP-noTM: ; SIGNAL_PEPTIDE: Signal peptide region; SIGNAL_PEPTIDE_H_REGION: Hydrophobic region of a signal peptide.; SignalP-TM: ; SIGNAL_PEPTIDE_C_REGION: C-terminal region of a sig…	NA	Unknown	chloroplast
Ec-00_001180	Leucine rich repeat protein	GO:0003779;GO:0007010	SM00364: Leucine-rich repeats, bacterial type; IPR003591: Leucine-rich repeat, typical subtype; IPR001611: Leucine-rich repeat; IPR032675: Leucine-rich repeat domain, L domain-like; Coil: ; PTHR23155:	NA	Cellular regulation and signalling	other localisation
Ec-00_001190	expressed unknown protein	GO:0004871;GO:0007165;n/a	NA	NA	Unknown	other localisation
Ec-00_001200	Hypothetical leucine rich repeat protein	GO:0005515	SSF48452: ; G3DSA:3.80.10.10: ; IPR011990: Tetratricopeptide-like helical domain; SSF52058: ; IPR001611: Leucine-rich repeat; IPR025875: Leucine rich repeat 4; PF13516: Leucine Rich repeat; PTHR23155: ; SM00364: Leucine-rich repeats, bacterial type; IPR001202: WW domain; IPR003591: Leucine-rich repeat, typical subtype; SM00365: Leucine-rich repeat, SDS22-like subfamily; Coil:	NA	Cellular regulation and signalling	other localisation
Ec-00_001210	Hypothetical protein	n/a;n/a;n/a	NA	NA	Unknown	nd
Ec-00_001220	Pleckstrin homology-like domain	n/a;GO:0005515	SSF50729: ; IPR011993: Pleckstrin homology-like domain; IPR020683: Ankyrin repeat-containing domain; PF13637: Ankyrin repeats (many copies); PTHR24198: ; IPR002110: Ankyrin repeat	NA	Cellular regulation and signalling	other localisation
Ec-00_001230	Kynurenine/Oxoglutarate Transaminase	GO:0003824;GO:0009058;GO:0030170	IPR004839: Aminotransferase, class I/classII; IPR015424: Pyridoxal phosphate-dependent transferase; PTHR11751: ; IPR015422: Pyridoxal phosphate-dependent transferase, major region, subdomain 2; IPR015421: Pyridoxal phosphate-dependent transferase, major region, subdomain 1	KOG0257	Metabolism	other localisation
Ec-00_001240	Ribosomal protein L41	GO:0003735;GO:0005840;GO:0006412	PTHR10666: ; G3DSA:3.10.20.90: ; IPR029071: Ubiquitin-related domain; IPR000626: Ubiquitin domain; IPR007836: Ribosomal protein L41	NA	Protein synthesis	other localisation
Ec-00_001250	pre-mRNA splicing factor, putative	n/a;n/a;n/a	NA	NA	RNA modification or binding	other localisation
Ec-00_001260	hypothetical protein	n/a;n/a;n/a	NA	NA	Unknown	nd
Ec-00_001270	hypothetical protein	n/a;n/a;n/a	NA	NA	Unknown	other localisation
Ec-00_001280	P-loop containing nucleoside triphosphate hydrolase	n/a;n/a;n/a	IPR010655: Pre-mRNA cleavage complex II Clp1; IPR027417: P-loop containing nucleoside triphosphate hydrolase; PTHR12755: ; IPR029007: MobB-type P-loop domain	NA	Metabolism	other localisation
Ec-00_001290	expressed unknown protein	n/a;n/a;n/a	CYTOPLASMIC_DOMAIN: Region of a membrane-bound protein predicted to be outside the membrane, in the cytoplasm.; NON_CYTOPLASMIC_DOMAIN: Region of a membrane-bound protein predicted to be outside the membrane, in the extracellular region; TMhelix: Region of a membrane-bound protein predicted to be embedded in the membrane.; Coil: ; TRANSMEMBRANE: Region of a membrane-bound protein predicted to be …	NA	Unknown	other localisation
Ec-00_001300	Dolichol kinase	GO:0004168;GO:0043048;GO:0030176	PTHR13205: ; IPR026566: Dolichol kinase; TMhelix: Region of a membrane-bound protein predicted to be embedded in the membrane.; SIGNAL_PEPTIDE: Signal peptide region; SIGNAL_PEPTIDE_N_REGION: N-terminal region of a signal peptide.; SIGNAL_PEPTIDE_C_REGION: C-terminal region of a signal peptide.; CYTOPLASMIC_DOMAIN: Region of a membrane-bound protein predicted to be outside the membrane, in the cy…	NA	Metabolism	signal peptide
Ec-00_001310	SET domain protein	GO:0005515	NA	NA	DNA or chromatin modification	other localisation
Ec-00_001320	Flavoprotein Monooxygenase	GO:0008152;GO:0016491	IPR002938: Monooxygenase, FAD-binding; SIGNAL_PEPTIDE: Signal peptide region; SIGNAL_PEPTIDE_N_REGION: N-terminal region of a signal peptide.; SIGNAL_PEPTIDE_C_REGION: C-terminal region of a signal peptide.; NON_CYTOPLASMIC_DOMAIN: Region of a membrane-bound protein predicted to be outside the membrane, in the extracellular region; SignalP-noTM: ; G3DSA:3.50.50.60: ; PTHR13789: ; SIGNAL_PEPTIDE_H…	KOG2614	Metabolism	signal peptide
Ec-00_001330	Hypothetical protein	n/a;n/a;n/a	CYTOPLASMIC_DOMAIN: Region of a membrane-bound protein predicted to be outside the membrane, in the cytoplasm.; NON_CYTOPLASMIC_DOMAIN: Region of a membrane-bound protein predicted to be outside the membrane, in the extracellular region; SIGNAL_PEPTIDE: Signal peptide region; SIGNAL_PEPTIDE_N_REGION: N-terminal region of a signal peptide.; SIGNAL_PEPTIDE_H_REGION: Hydrophobic region of a signal p…	NA	Unknown	mitochondrion
Ec-00_001340	Ankyrin repeat	GO:0005515	PF13637: Ankyrin repeats (many copies); IPR020683: Ankyrin repeat-containing domain; PF13857: Ankyrin repeats (many copies); PTHR24188: ; IPR002110: Ankyrin repeat	NA	Membrane function and transporters	other localisation
Ec-00_001350	conserved unknown protein	n/a;n/a;n/a	NON_CYTOPLASMIC_DOMAIN: Region of a membrane-bound protein predicted to be outside the membrane, in the extracellular region; SIGNAL_PEPTIDE: Signal peptide region; SignalP-noTM: ; SIGNAL_PEPTIDE_N_REGION: N-terminal region of a signal peptide.; PTHR15863: ; SIGNAL_PEPTIDE_H_REGION: Hydrophobic region of a signal peptide.; SIGNAL_PEPTIDE_C_REGION: C-terminal region of a signal peptide.	NA	Unknown	other localisation
Ec-00_001360	aureochrome 2	GO:0004871;GO:0007165	IPR004827: Basic-leucine zipper domain; IPR001610: PAC motif; IPR000014: PAS domain; SSF57959: ; G3DSA:1.20.5.170: ; G3DSA:3.30.450.20: ; Coil: ; PTHR24351:	NA	Cellular regulation and signalling	other localisation
Ec-00_001370	Mannosyl-oligosaccharide glucosidase, family GH63	GO:0003824	CYTOPLASMIC_DOMAIN: Region of a membrane-bound protein predicted to be outside the membrane, in the cytoplasm.; IPR004888: Glycoside hydrolase, family 63; NON_CYTOPLASMIC_DOMAIN: Region of a membrane-bound protein predicted to be outside the membrane, in the extracellular region; TMhelix: Region of a membrane-bound protein predicted to be embedded in the membrane.; IPR008928: Six-hairpin glycosid…	KOG2161	Metabolism	signal anchor
Ec-00_001380	G-patch domain	GO:0003676	PTHR23149: ; IPR000467: G-patch domain; Coil:	NA	RNA modification or binding	other localisation
Ec-00_001390	conserved unknown protein	n/a;n/a;n/a	NA	NA	Unknown	other localisation
Ec-00_001400	Tyrosyl-DNA phosphodiesterase	GO:0005634;GO:0006281;GO:0008081	IPR010347: Tyrosyl-DNA phosphodiesterase I; IPR027415: Tyrosyl-DNA phosphodiesterase C-terminal domain; G3DSA:3.30.870.10: ; SSF56024:	KOG2031	Metabolism	other localisation
Ec-00_001410	ubiquitin domain-containing protein	GO:0004221;GO:0006511	SSF63748: ; SSF54001: ; IPR001394: Peptidase C19, ubiquitin carboxyl-terminal hydrolase; IPR011992: EF-hand domain pair; IPR002048: EF-hand domain; SSF47473: ; PTHR24006: ; CYTOPLASMIC_DOMAIN: Region of a membrane-bound protein predicted to be outside the membrane, in the cytoplasm.; NON_CYTOPLASMIC_DOMAIN: Region of a membrane-bound protein predicted to be outside the membrane, in the extracellu…	KOG1863	Proteolysis	other localisation
Ec-00_001420	D123	n/a;GO:0007049	PTHR15323: ; PF07065: D123; IPR009772: Cell division cycle protein 123	NA	Unknown	other localisation
Ec-00_001430	DEAD box helicase	n/a;n/a;n/a	IPR011545: DEAD/DEAH box helicase domain; SIGNAL_PEPTIDE: Signal peptide region; TMhelix: Region of a membrane-bound protein predicted to be embedded in the membrane.; IPR012562: GUCT; IPR000629: ATP-dependent RNA helicase DEAD-box, conserved site; IPR027417: P-loop containing nucleoside triphosphate hydrolase; SIGNAL_PEPTIDE_N_REGION: N-terminal region of a signal peptide.; PTHR24031: ; SignalP-…	KOG0331	DNA or chromatin modification	chloroplast
Ec-00_001440	ATP-dependent Clp protease adaptor protein ClpS	n/a;n/a;n/a	TMhelix: Region of a membrane-bound protein predicted to be embedded in the membrane.; SIGNAL_PEPTIDE: Signal peptide region; IPR014719: Ribosomal protein L7/L12, C-terminal/adaptor protein ClpS-like; SIGNAL_PEPTIDE_N_REGION: N-terminal region of a signal peptide.; SignalP-TM: ; SIGNAL_PEPTIDE_C_REGION: C-terminal region of a signal peptide.; IPR003769: Adaptor protein ClpS, core; NON_CYTOPLASMIC…	NA	Proteolysis	chloroplast
Ec-00_001450	Thioredoxin-like fold	n/a;n/a;n/a	NON_CYTOPLASMIC_DOMAIN: Region of a membrane-bound protein predicted to be outside the membrane, in the extracellular region; SIGNAL_PEPTIDE: Signal peptide region; TMhelix: Region of a membrane-bound protein predicted to be embedded in the membrane.; SIGNAL_PEPTIDE_N_REGION: N-terminal region of a signal peptide.; IPR012336: Thioredoxin-like fold; SIGNAL_PEPTIDE_H_REGION: Hydrophobic region of a…	NA	Redox	signal anchor
Ec-00_001460	Ubiquitin-conjugating enzyme E2	GO:0019787;GO:0043687;GO:0051246	IPR016135: Ubiquitin-conjugating enzyme/RWD-like; SM00212: Ubiquitin-conjugating enzyme E2, catalytic domain homologues; IPR000608: Ubiquitin-conjugating enzyme E2; Coil: ; PTHR24068:	NA	Proteolysis	other localisation
Ec-00_001480	hypothetical protein	n/a;n/a;n/a	Coil:	NA	Unknown	other localisation
Ec-00_001490	DNA glycosylase	GO:0003824;GO:0006281	IPR005759: Endonuclease III; IPR011257: DNA glycosylase; PTHR10359:SF18: ; PTHR10359: ; IPR004036: Endonuclease III-like, conserved site-2; IPR023170: Helix-turn-helix, base-excision DNA repair, C-terminal; IPR003265: HhH-GPD domain; IPR000445: Helix-hairpin-helix motif	NA	DNA or chromatin modification	other localisation
Ec-00_001500	Integral membrane protein TerC, riboswitch-linked	GO:0016021	CYTOPLASMIC_DOMAIN: Region of a membrane-bound protein predicted to be outside the membrane, in the cytoplasm.; NON_CYTOPLASMIC_DOMAIN: Region of a membrane-bound protein predicted to be outside the membrane, in the extracellular region; PTHR30238: ; TMhelix: Region of a membrane-bound protein predicted to be embedded in the membrane.; IPR005496: Integral membrane protein TerC; IPR022369: Integra…	NA	Membrane function and transporters	other localisation
Ec-00_001510	expressed unknown protein	n/a;n/a;n/a	NA	NA	Unknown	other localisation
Ec-00_001520	hypothetical protein	n/a;n/a;n/a	CYTOPLASMIC_DOMAIN: Region of a membrane-bound protein predicted to be outside the membrane, in the cytoplasm.; NON_CYTOPLASMIC_DOMAIN: Region of a membrane-bound protein predicted to be outside the membrane, in the extracellular region; TMhelix: Region of a membrane-bound protein predicted to be embedded in the membrane.; Coil: ; TRANSMEMBRANE: Region of a membrane-bound protein predicted to be …	NA	Unknown	signal anchor
Ec-00_001530	HIT-like domain	GO:0003824	IPR011146: HIT-like domain; IPR026963: Aprataxin; IPR001310: Histidine triad (HIT) protein; PF11969: Scavenger mRNA decapping enzyme C-term binding	NA	Metabolism	other localisation
Ec-00_001540	hypothetical protein	n/a;n/a;n/a	SSF81995: ; Coil:	NA	Unknown	other localisation
Ec-00_001550	FYVE zinc finger	GO:0046872	IPR000306: FYVE zinc finger; IPR017455: Zinc finger, FYVE-related; IPR013083: Zinc finger, RING/FYVE/PHD-type; IPR011011: Zinc finger, FYVE/PHD-type; IPR007461: Ysc84 actin-binding domain; PTHR15629:	NA	Transcription	other localisation
Ec-00_001560	Hypothetical protein	n/a;n/a;n/a	CYTOPLASMIC_DOMAIN: Region of a membrane-bound protein predicted to be outside the membrane, in the cytoplasm.; NON_CYTOPLASMIC_DOMAIN: Region of a membrane-bound protein predicted to be outside the membrane, in the extracellular region; TMhelix: Region of a membrane-bound protein predicted to be embedded in the membrane.; TRANSMEMBRANE: Region of a membrane-bound protein predicted to be embedded…	NA	Unknown	signal peptide
Ec-00_001570	hypothetical protein	n/a;n/a;n/a	Coil:	NA	Unknown	other localisation
Ec-00_001580	WD40 repeat	GO:0005515	IPR019775: WD40 repeat, conserved site; IPR001680: WD40 repeat; IPR013934: Small-subunit processome, Utp13; IPR020472: G-protein beta WD-40 repeat; IPR017986: WD40-repeat-containing domain; PTHR19854: ; IPR015943: WD40/YVTN repeat-like-containing domain; Coil: ; IPR011047: Quinonprotein alcohol dehydrogenase-like superfamily	NA	Protein binding or modification	other localisation
Ec-00_001590	hypothetical protein	n/a;n/a;n/a	NON_CYTOPLASMIC_DOMAIN: Region of a membrane-bound protein predicted to be outside the membrane, in the extracellular region; TMhelix: Region of a membrane-bound protein predicted to be embedded in the membrane.; TRANSMEMBRANE: Region of a membrane-bound protein predicted to be embedded in the membrane.	NA	Unknown	other localisation
Ec-00_001600	hypothetical protein	n/a;n/a;n/a	NA	NA	Unknown	other localisation
Ec-00_001610	F-box domain	GO:0005515	IPR001810: F-box domain; G3DSA:1.20.1280.50:	NA	Proteolysis	other localisation
Ec-00_001620	Bestrophin/UPF0187	n/a;n/a;n/a	CYTOPLASMIC_DOMAIN: Region of a membrane-bound protein predicted to be outside the membrane, in the cytoplasm.; IPR021134: Bestrophin/UPF0187; NON_CYTOPLASMIC_DOMAIN: Region of a membrane-bound protein predicted to be outside the membrane, in the extracellular region; TMhelix: Region of a membrane-bound protein predicted to be embedded in the membrane.; TRANSMEMBRANE: Region of a membrane-bound p…	NA	Unknown	other localisation
Ec-00_001630	Potassium channel, inwardly rectifying, Kir	GO:0005242;GO:0006813;GO:0016021	IPR016449: Potassium channel, inwardly rectifying, Kir; G3DSA:1.10.287.70: ; IPR014756: Immunoglobulin E-set; TMhelix: Region of a membrane-bound protein predicted to be embedded in the membrane.; IPR013518: Potassium channel, inwardly rectifying, Kir, cytoplasmic; SSF81324: ; CYTOPLASMIC_DOMAIN: Region of a membrane-bound protein predicted to be outside the membrane, in the cytoplasm.; NON_CYTOP…	NA	Membrane function and transporters	other localisation
Ec-00_001640	putative decarboxylase family protein, lysine decarboxylase?	NA	PTHR31223: ; IPR005269: Cytokinin riboside 5'-monophosphate phosphoribohydrolase LOG; G3DSA:3.40.50.450: ; SSF102405: ; IPR031100: LOG family; CYTOPLASMIC_DOMAIN: Region of a membrane-bound protein predicted to be outside the membrane, in the cytoplasm.; NON_CYTOPLASMIC_DOMAIN: Region of a membrane-bound protein predicted to be outside the membrane, in the extracellular region; TRANSMEMBRANE: Reg…	NA	Metabolism	other localisation
Ec-00_001650	hypothetical protein	n/a;n/a;n/a	NA	NA	Unknown	other localisation
Ec-00_001660	Hypothetical protein	n/a;n/a;n/a	NA	NA	Unknown	nd
Ec-00_001670	hypothetical protein	n/a;n/a;n/a	CYTOPLASMIC_DOMAIN: Region of a membrane-bound protein predicted to be outside the membrane, in the cytoplasm.; NON_CYTOPLASMIC_DOMAIN: Region of a membrane-bound protein predicted to be outside the membrane, in the extracellular region; TMhelix: Region of a membrane-bound protein predicted to be embedded in the membrane.; Coil: ; TRANSMEMBRANE: Region of a membrane-bound protein predicted to be …	NA	Unknown	signal anchor
Ec-00_001680	Hypothetical protein	n/a;n/a;n/a	NA	NA	Unknown	other localisation
Ec-00_001690	conserved unknown protein	n/a;n/a;n/a	IPR011992: EF-hand domain pair; SSF47473:	NA	Unknown	other localisation
Ec-00_001700	Putative NIN-like transcription factor	n/a;n/a;n/a	IPR003035: RWP-RK domain; PTHR32002:	NA	Transcription	other localisation
Ec-00_001710	expressed unknown protein	n/a;n/a;n/a	NON_CYTOPLASMIC_DOMAIN: Region of a membrane-bound protein predicted to be outside the membrane, in the extracellular region; SignalP-noTM: ; SIGNAL_PEPTIDE: Signal peptide region; PS51257: Prokaryotic membrane lipoprotein lipid attachment site profile.; SIGNAL_PEPTIDE_N_REGION: N-terminal region of a signal peptide.; SIGNAL_PEPTIDE_H_REGION: Hydrophobic region of a signal peptide.; SignalP-TM: ;…	NA	Unknown	signal peptide
Ec-00_001720	Winged helix-turn-helix DNA-binding domain	n/a;GO:0005515	IPR000717: Proteasome component (PCI) domain; IPR011991: Winged helix-turn-helix DNA-binding domain; SSF46785: ; PTHR10855:	NA	Transcription	other localisation
Ec-00_001730	WD40 repeat	GO:0005515	IPR013890: Transcriptional repressor Tup1, N-terminal; PTHR22847: ; IPR019775: WD40 repeat, conserved site; IPR017986: WD40-repeat-containing domain; IPR001680: WD40 repeat; IPR015943: WD40/YVTN repeat-like-containing domain; Coil: ; IPR020472: G-protein beta WD-40 repeat	NA	Protein binding or modification	other localisation
Ec-00_001740	2Fe-2S ferredoxin-type domain	GO:0009055;GO:0051536	IPR001041: 2Fe-2S ferredoxin-type domain; SIGNAL_PEPTIDE: Signal peptide region; SIGNAL_PEPTIDE_N_REGION: N-terminal region of a signal peptide.; IPR012675: Beta-grasp domain; SignalP-TM: ; SIGNAL_PEPTIDE_C_REGION: C-terminal region of a signal peptide.; NON_CYTOPLASMIC_DOMAIN: Region of a membrane-bound protein predicted to be outside the membrane, in the extracellular region; SignalP-noTM: ; SI…	NA	Metabolism	signal peptide
Ec-00_001750	porphobilinogen synthase, putative chloroplast precursor	GO:0004655;GO:0033014;GO:0046872	IPR013785: Aldolase-type TIM barrel; TMhelix: Region of a membrane-bound protein predicted to be embedded in the membrane.; SIGNAL_PEPTIDE: Signal peptide region; SIGNAL_PEPTIDE_N_REGION: N-terminal region of a signal peptide.; SIGNAL_PEPTIDE_C_REGION: C-terminal region of a signal peptide.; SignalP-TM: ; NON_CYTOPLASMIC_DOMAIN: Region of a membrane-bound protein predicted to be outside the membr…	KOG2794	Metabolism	chloroplast
Ec-00_001760	WD40/YVTN repeat-like-containing domain	GO:0005515	IPR017986: WD40-repeat-containing domain; IPR015943: WD40/YVTN repeat-like-containing domain	NA	Protein binding or modification	other localisation
Ec-00_001770	hypothetical protein	n/a;n/a;n/a	CYTOPLASMIC_DOMAIN: Region of a membrane-bound protein predicted to be outside the membrane, in the cytoplasm.; NON_CYTOPLASMIC_DOMAIN: Region of a membrane-bound protein predicted to be outside the membrane, in the extracellular region; TMhelix: Region of a membrane-bound protein predicted to be embedded in the membrane.; Coil: ; TRANSMEMBRANE: Region of a membrane-bound protein predicted to be …	NA	Unknown	signal anchor
Ec-00_001780	Hypothetical protein	n/a;n/a;n/a	NA	NA	Unknown	other localisation
Ec-00_001790	expressed unknown protein	n/a;n/a;n/a	NA	NA	Unknown	other localisation
Ec-00_001800	PR1-like metalloprotease	NA	NA	NA	Defence	other localisation
Ec-00_001810	PR1-like metalloprotease	GO:0016020;GO:0004222;GO:0007155;GO:0006508	G3DSA:2.10.25.10: ; IPR024079: Metallopeptidase, catalytic domain; G3DSA:3.90.132.10: ; IPR000742: Epidermal growth factor-like domain; SSF55486: ; IPR001577: Peptidase M8, leishmanolysin; SSF57196:	NA	Defence	other localisation
Ec-00_001820	Hypothetical protein	n/a;n/a;n/a	NA	NA	Unknown	nd
Ec-00_001850	PR1-like metalloprotease	NA	G3DSA:2.10.25.10: ; IPR013994: Carbohydrate-binding WSC, subgroup; IPR024079: Metallopeptidase, catalytic domain; PTHR19297: ; IPR002889: Carbohydrate-binding WSC; G3DSA:3.90.132.10: ; IPR000742: EGF-like domain; PR01217: Proline rich extensin signature; SSF57196: ; IPR014044: CAP domain; IPR013032: EGF-like, conserved site; IPR001577: Peptidase M8, leishmanolysin; SSF55486:	NA	Defence	other localisation
Ec-00_001860	PR1-like metalloprotease	NA	IPR024079: Metallopeptidase, catalytic domain; IPR002889: Carbohydrate-binding WSC; IPR000742: EGF-like domain; PR01217: Proline rich extensin signature; IPR014044: CAP domain; NON_CYTOPLASMIC_DOMAIN: Region of a membrane-bound protein predicted to be outside the membrane, in the extracellular region; SSF55486: ; SIGNAL_PEPTIDE_H_REGION: Hydrophobic region of a signal peptide.; G3DSA:2.10.25.10: …	NA	Defence	signal peptide
Ec-00_001870	EsV-1-166	GO:0005622;GO:0008270;n/a	IPR013994: Carbohydrate-binding WSC, subgroup; IPR002889: Carbohydrate-binding WSC	KOG4157	Cell wall and extracellular	other localisation
Ec-00_001890	EsV-1-166	GO:0003676;GO:0005622;GO:0008270	NON_CYTOPLASMIC_DOMAIN: Region of a membrane-bound protein predicted to be outside the membrane, in the extracellular region; IPR013994: Carbohydrate-binding WSC, subgroup; SIGNAL_PEPTIDE: Signal peptide region; IPR002889: Carbohydrate-binding WSC; SIGNAL_PEPTIDE_N_REGION: N-terminal region of a signal peptide.; SIGNAL_PEPTIDE_H_REGION: Hydrophobic region of a signal peptide.; SIGNAL_PEPTIDE_C_RE…	KOG4157	Cell wall and extracellular	signal peptide
Ec-00_001900	EsV-1-166	GO:0005622;GO:0008270;n/a	IPR013994: Carbohydrate-binding WSC, subgroup; SIGNAL_PEPTIDE: Signal peptide region; IPR002889: Carbohydrate-binding WSC; PTHR19297: ; SIGNAL_PEPTIDE_N_REGION: N-terminal region of a signal peptide.; SIGNAL_PEPTIDE_C_REGION: C-terminal region of a signal peptide.; NON_CYTOPLASMIC_DOMAIN: Region of a membrane-bound protein predicted to be outside the membrane, in the extracellular region; SignalP…	KOG4157	Cell wall and extracellular	signal peptide
Ec-00_001910	Domain of unknown function DUF2431	n/a;n/a;n/a	PTHR11538: ; IPR019446: Domain of unknown function DUF2431	NA	Unknown	other localisation
Ec-00_001920	EsV-1-166	GO:0003676;GO:0005622;GO:0008270	IPR013994: Carbohydrate-binding WSC, subgroup; IPR002889: Carbohydrate-binding WSC; IPR004302: Chitin-binding, domain 3	KOG4157	Cell wall and extracellular	other localisation
Ec-00_001930	Domain of unknown function DUF2431	n/a;n/a;n/a	SIGNAL_PEPTIDE: Signal peptide region; PTHR11538: ; SIGNAL_PEPTIDE_N_REGION: N-terminal region of a signal peptide.; IPR019446: Domain of unknown function DUF2431; SIGNAL_PEPTIDE_C_REGION: C-terminal region of a signal peptide.; NON_CYTOPLASMIC_DOMAIN: Region of a membrane-bound protein predicted to be outside the membrane, in the extracellular region; Coil: ; SIGNAL_PEPTIDE_H_REGION: Hydrophobic…	NA	Unknown	other localisation
Ec-00_001940	NADH:ubiquinone oxidoreductase complex I	NA	SSF51735: ; TMhelix: Region of a membrane-bound protein predicted to be embedded in the membrane.; SIGNAL_PEPTIDE: Signal peptide region; SIGNAL_PEPTIDE_N_REGION: N-terminal region of a signal peptide.; PTHR13194: ; SIGNAL_PEPTIDE_C_REGION: C-terminal region of a signal peptide.; SignalP-TM: ; NON_CYTOPLASMIC_DOMAIN: Region of a membrane-bound protein predicted to be outside the membrane, in the …	NA	Metabolism	signal peptide
Ec-00_001950	Pentatricopeptide repeat	n/a;n/a;n/a	IPR002885: Pentatricopeptide repeat; IPR011990: Tetratricopeptide-like helical domain; IPR005158: Bacterial transcriptional activator domain; PTHR24015:	NA	RNA modification or binding	other localisation
Ec-00_001960	Armadillo-like helical	GO:0005488	PF13513: HEAT-like repeat; IPR001494: Importin-beta, N-terminal domain; IPR027140: Importin subunit beta-1; IPR011989: Armadillo-like helical; IPR000225: Armadillo; PTHR10527: ; IPR016024: Armadillo-type fold	NA	Cellular regulation and signalling	other localisation
Ec-00_001970	Hypothetical protein	n/a;n/a;n/a	NA	NA	Unknown	nd
Ec-00_001980	Hypothetical protein	n/a;n/a;n/a	NA	NA	Unknown	nd
Ec-00_001990	hypothetical protein	n/a;n/a;n/a	NA	NA	Unknown	other localisation
Ec-00_002000	Leucine rich repeat protein	GO:0005515	G3DSA:3.80.10.10: ; IPR003591: Leucine-rich repeat, typical subtype; SSF52058: ; PTHR24420: ; IPR001611: Leucine-rich repeat; IPR025875: Leucine rich repeat 4	NA	Cellular regulation and signalling	other localisation
Ec-00_002010	3-Dehydroquinate Synthase	GO:0003856;GO:0005737;GO:0009073	IPR016037: 3-dehydroquinate synthase AroB; TMhelix: Region of a membrane-bound protein predicted to be embedded in the membrane.; PS51257: Prokaryotic membrane lipoprotein lipid attachment site profile.; G3DSA:3.40.50.1970: ; CYTOPLASMIC_DOMAIN: Region of a membrane-bound protein predicted to be outside the membrane, in the cytoplasm.; G3DSA:1.20.1090.10: ; SSF56796: ; NON_CYTOPLASMIC_DOMAIN: Reg…	KOG0692	Metabolism	signal peptide
Ec-00_002020	Ankyrin repeat	GO:0005515	IPR020683: Ankyrin repeat-containing domain; IPR002110: Ankyrin repeat; PTHR24123:	NA	Membrane function and transporters	other localisation
Ec-00_002030	DEAD box helicase	n/a;n/a;n/a	IPR011545: DEAD/DEAH box helicase domain; IPR000629: ATP-dependent RNA helicase DEAD-box, conserved site; IPR027417: P-loop containing nucleoside triphosphate hydrolase; PTHR24031: ; IPR014014: RNA helicase, DEAD-box type, Q motif; IPR014001: Helicase superfamily 1/2, ATP-binding domain; Coil: ; IPR001650: Helicase, C-terminal	KOG0331	DNA or chromatin modification	other localisation
Ec-00_002040	Thioredoxin-like fold	n/a;n/a;n/a	PS51257: Prokaryotic membrane lipoprotein lipid attachment site profile.; TMhelix: Region of a membrane-bound protein predicted to be embedded in the membrane.; IPR013766: Thioredoxin domain; CYTOPLASMIC_DOMAIN: Region of a membrane-bound protein predicted to be outside the membrane, in the cytoplasm.; NON_CYTOPLASMIC_DOMAIN: Region of a membrane-bound protein predicted to be outside the membrane…	NA	Redox	signal anchor
Ec-00_002050	Myosin light chain kinase (MLCK)	GO:0004672;GO:0005524;GO:0006468	IPR017441: Protein kinase, ATP binding site; IPR002290: Serine/threonine/dual specificity protein kinase, catalytic domain; G3DSA:3.30.200.20: ; IPR011009: Protein kinase-like domain; IPR008271: Serine/threonine-protein kinase, active site; CYTOPLASMIC_DOMAIN: Region of a membrane-bound protein predicted to be outside the membrane, in the cytoplasm.; NON_CYTOPLASMIC_DOMAIN: Region of a membrane-b…	KOG0032	Cytoskeleton and flagella	other localisation
Ec-00_002060	expressed unknown protein	n/a;n/a;n/a	NA	NA	Unknown	other localisation
Ec-00_002070	MIF4-like, type 1/2/3	GO:0005515;GO:0016070	PTHR12839: ; IPR003890: MIF4G-like, type 3; IPR016024: Armadillo-type fold; Coil: ; IPR016021: MIF4-like, type 1/2/3; IPR007193: Up-frameshift suppressor 2	NA	Protein synthesis	other localisation
Ec-00_002080	hypothetical protein	n/a;n/a;n/a	Coil:	NA	Unknown	other localisation
Ec-00_002090	Exo-1,3-beta-glucanase, family GH5	GO:0003824;GO:0043169;GO:0005975	TMhelix: Region of a membrane-bound protein predicted to be embedded in the membrane.; IPR017853: Glycoside hydrolase superfamily; IPR001547: Glycoside hydrolase, family 5; PTHR31297: ; CYTOPLASMIC_DOMAIN: Region of a membrane-bound protein predicted to be outside the membrane, in the cytoplasm.; NON_CYTOPLASMIC_DOMAIN: Region of a membrane-bound protein predicted to be outside the membrane, in t…	NA	Metabolism	other localisation
Ec-00_002100	WD40 repeat	GO:0005515	PTHR22847: ; IPR017986: WD40-repeat-containing domain; IPR015943: WD40/YVTN repeat-like-containing domain; IPR001680: WD40 repeat	NA	Protein binding or modification	other localisation
Ec-00_002110	hypothetical protein	n/a;n/a;n/a	NA	NA	Unknown	other localisation
Ec-00_002120	Hypothetical protein	n/a;n/a;n/a	TMhelix: Region of a membrane-bound protein predicted to be embedded in the membrane.; SIGNAL_PEPTIDE: Signal peptide region; SIGNAL_PEPTIDE_N_REGION: N-terminal region of a signal peptide.; SIGNAL_PEPTIDE_C_REGION: C-terminal region of a signal peptide.; SignalP-TM: ; NON_CYTOPLASMIC_DOMAIN: Region of a membrane-bound protein predicted to be outside the membrane, in the extracellular region; Sig…	NA	Unknown	nd
Ec-00_002130	telomerase reverse transcriptase	n/a;n/a;n/a	NA	NA	RNA modification or binding	other localisation
Ec-00_002140	Ribonuclease H-like domain	GO:0003676	IPR012337: Ribonuclease H-like domain	NA	RNA modification or binding	other localisation
Ec-00_002160	DNA-directed RNA polymerase, subunit 2	GO:0003899;GO:0006351;GO:0032549	IPR015712: DNA-directed RNA polymerase, subunit 2; IPR007645: RNA polymerase Rpb2, domain 3; SSF64484: ; PTHR20856:SF8: ; G3DSA:3.90.1100.10:	NA	Transcription	other localisation
Ec-00_002170	conserved unknown protein	n/a;n/a;n/a	PTHR12558:	NA	Unknown	other localisation
Ec-00_002190	hypothetical protein	n/a;n/a;n/a	NA	NA	Unknown	other localisation
Ec-00_002200	S-adenosyl-L-methionine-dependent methyltransferase	GO:0003677;GO:0006306;GO:0008170;GO:0015667;GO:0032776	IPR029063: S-adenosyl-L-methionine-dependent methyltransferase	NA	Metabolism	other localisation
Ec-00_002210	Mannosyl-oligosaccharide 1,2-alpha-mannosidase, central fragment, family GH47	GO:0016020;GO:0005509;GO:0004571	IPR001382: Glycoside hydrolase, family 47	KOG2204	Metabolism	other localisation
Ec-00_002230	Hypothetical protein	n/a;n/a;n/a	NA	NA	Unknown	other localisation
Ec-00_002240	hypothetical protein	n/a;n/a;n/a	NA	NA	Unknown	other localisation
Ec-00_002250	EF-hand domain pair	GO:0005509	IPR002048: EF-hand domain; IPR011992: EF-hand domain pair; SSF47473:	NA	Cellular regulation and signalling	other localisation
Ec-00_002260	Thioredoxin-like fold	n/a;n/a;n/a	IPR012336: Thioredoxin-like fold	NA	Redox	other localisation
Ec-00_002270	Ankyrin repeat-containing domain	n/a;n/a;n/a	IPR020683: Ankyrin repeat-containing domain; SSF140860:	NA	Membrane function and transporters	other localisation
Ec-00_002280	hypothetical protein	n/a;n/a;n/a	NA	NA	Unknown	other localisation
Ec-00_002290	expressed unknown protein	n/a;n/a;n/a	NA	NA	Unknown	other localisation
Ec-00_002310	conserved unknown protein	n/a;n/a;n/a	NA	NA	Unknown	other localisation
Ec-00_002320	Flavin monooxygenase-like	GO:0050660;GO:0055114;GO:0050661;GO:0004499	G3DSA:3.50.50.60: ; PTHR23023: ; IPR020946: Flavin monooxygenase-like; SSF51905:	NA	Metabolism	other localisation
Ec-00_002330	hypothetical protein	n/a;n/a;n/a	NA	NA	Unknown	other localisation
Ec-00_002340	conserved unknown protein	n/a;n/a;n/a	NON_CYTOPLASMIC_DOMAIN: Region of a membrane-bound protein predicted to be outside the membrane, in the extracellular region; SIGNAL_PEPTIDE: Signal peptide region; SignalP-noTM: ; SIGNAL_PEPTIDE_N_REGION: N-terminal region of a signal peptide.; SIGNAL_PEPTIDE_H_REGION: Hydrophobic region of a signal peptide.; SIGNAL_PEPTIDE_C_REGION: C-terminal region of a signal peptide.	NA	Unknown	signal peptide
Ec-00_002350	Hypothetical protein	n/a;n/a;n/a	NA	NA	Unknown	nd
Ec-00_002360	hypothetical protein	n/a;n/a;n/a	NA	NA	Unknown	other localisation
Ec-00_002370	hypothetical protein	n/a;n/a;n/a	IPR003323: OTU domain	NA	Unknown	other localisation
Ec-00_002380	conserved unknown protein	n/a;n/a;n/a	NON_CYTOPLASMIC_DOMAIN: Region of a membrane-bound protein predicted to be outside the membrane, in the extracellular region; SIGNAL_PEPTIDE: Signal peptide region; SignalP-noTM: ; SIGNAL_PEPTIDE_N_REGION: N-terminal region of a signal peptide.; SIGNAL_PEPTIDE_H_REGION: Hydrophobic region of a signal peptide.; SIGNAL_PEPTIDE_C_REGION: C-terminal region of a signal peptide.	NA	Unknown	signal peptide
Ec-00_002390	telomerase reverse transcriptase, putative	n/a;n/a;n/a	NA	NA	RNA modification or binding	other localisation
Ec-00_002400	hypothetical protein	n/a;n/a;n/a	NA	NA	Unknown	nd
Ec-00_002410	hypothetical protein	n/a;n/a;n/a	CYTOPLASMIC_DOMAIN: Region of a membrane-bound protein predicted to be outside the membrane, in the cytoplasm.; NON_CYTOPLASMIC_DOMAIN: Region of a membrane-bound protein predicted to be outside the membrane, in the extracellular region; TMhelix: Region of a membrane-bound protein predicted to be embedded in the membrane.; TRANSMEMBRANE: Region of a membrane-bound protein predicted to be embedded…	NA	Unknown	signal anchor
Ec-00_002420	expressed unknown protein	GO:0004672;GO:0005524;GO:0006468;n/a	G3DSA:1.10.510.10:	NA	Unknown	other localisation
Ec-00_002430	conserved unknown protein	n/a;n/a;n/a	NA	NA	Unknown	other localisation
Ec-00_002440	hypothetical protein	n/a;n/a;n/a	NA	NA	Unknown	other localisation
Ec-00_002450	expressed unknown protein	n/a;n/a;n/a	NA	NA	Unknown	nd
Ec-00_002470	Glycine cleavage T-protein-like, N-terminal	GO:0004047;GO:0005737;GO:0006546;n/a	SSF103025: ; IPR006222: Glycine cleavage T-protein-like, N-terminal; G3DSA:3.30.70.1400: ; PTHR22602:	NA	Metabolism	other localisation
Ec-00_002480	Notch domain	GO:0016020;GO:0030154	IPR000800: Notch domain	NA	Cellular regulation and signalling	other localisation
Ec-00_002490	expressed unknown protein	n/a;n/a;n/a	NA	NA	Unknown	other localisation
Ec-00_002500	expressed unknown protein	n/a;n/a;n/a	NA	NA	Unknown	nd
Ec-00_002510	hypothetical protein	n/a;n/a;n/a	NA	NA	Unknown	other localisation
Ec-00_002520	Hypothetical protein	n/a;n/a;n/a	NA	NA	Unknown	nd
Ec-00_002530	RNA polymerase Rpb2, domain 2	GO:0003677;GO:0006351;GO:0003899	IPR015712: DNA-directed RNA polymerase, subunit 2; SSF64484: ; IPR007642: RNA polymerase Rpb2, domain 2	NA	Transcription	other localisation
Ec-00_002540	WSC domain containing protein	NA	IPR013994: Carbohydrate-binding WSC, subgroup; IPR002889: Carbohydrate-binding WSC	NA	Cell wall and extracellular	other localisation
Ec-00_002550	conserved unknown protein	n/a;n/a;n/a	NA	NA	Unknown	other localisation
Ec-00_002560	hypothetical protein	n/a;n/a;n/a	NA	NA	Unknown	nd
Ec-00_002570	2Fe-2S ferredoxin-type domain	GO:0009055;GO:0051536	PTHR11908: ; IPR001041: 2Fe-2S ferredoxin-type domain; IPR006058: 2Fe-2S ferredoxin, iron-sulphur binding site; TMhelix: Region of a membrane-bound protein predicted to be embedded in the membrane.; IPR012675: Beta-grasp domain	NA	Metabolism	other localisation
Ec-00_002580	Hypothetical protein	n/a;n/a;n/a	NON_CYTOPLASMIC_DOMAIN: Region of a membrane-bound protein predicted to be outside the membrane, in the extracellular region; SIGNAL_PEPTIDE: Signal peptide region; SignalP-noTM: ; SIGNAL_PEPTIDE_N_REGION: N-terminal region of a signal peptide.; SIGNAL_PEPTIDE_H_REGION: Hydrophobic region of a signal peptide.; SIGNAL_PEPTIDE_C_REGION: C-terminal region of a signal peptide.	NA	Unknown	nd
Ec-00_002590	hypothetical protein	n/a;n/a;n/a	CYTOPLASMIC_DOMAIN: Region of a membrane-bound protein predicted to be outside the membrane, in the cytoplasm.; NON_CYTOPLASMIC_DOMAIN: Region of a membrane-bound protein predicted to be outside the membrane, in the extracellular region; TMhelix: Region of a membrane-bound protein predicted to be embedded in the membrane.; TRANSMEMBRANE: Region of a membrane-bound protein predicted to be embedded…	NA	Unknown	mitochondrion
Ec-00_002600	Ion transport domain	GO:0016020;GO:0055085;GO:0006811;GO:0005216	CYTOPLASMIC_DOMAIN: Region of a membrane-bound protein predicted to be outside the membrane, in the cytoplasm.; SSF81324: ; PTHR10217: ; NON_CYTOPLASMIC_DOMAIN: Region of a membrane-bound protein predicted to be outside the membrane, in the extracellular region; G3DSA:1.10.287.70: ; IPR005821: Ion transport domain; TRANSMEMBRANE: Region of a membrane-bound protein predicted to be embedded in the …	NA	Membrane function and transporters	other localisation
Ec-00_002610	Hypothetical protein	n/a;n/a;n/a	NA	NA	Unknown	nd
Ec-00_002620	expressed unknown protein	n/a;n/a;n/a	NA	NA	Unknown	other localisation
Ec-00_002630	conserved unknown protein	n/a;n/a;n/a	NON_CYTOPLASMIC_DOMAIN: Region of a membrane-bound protein predicted to be outside the membrane, in the extracellular region; TMhelix: Region of a membrane-bound protein predicted to be embedded in the membrane.; SIGNAL_PEPTIDE: Signal peptide region; SIGNAL_PEPTIDE_N_REGION: N-terminal region of a signal peptide.; SIGNAL_PEPTIDE_H_REGION: Hydrophobic region of a signal peptide.; SignalP-TM: ; SI…	NA	Unknown	signal peptide
Ec-00_002640	Bicarbonate transporter, eukaryotic	GO:0016020;GO:0006820;GO:0005452	CYTOPLASMIC_DOMAIN: Region of a membrane-bound protein predicted to be outside the membrane, in the cytoplasm.; NON_CYTOPLASMIC_DOMAIN: Region of a membrane-bound protein predicted to be outside the membrane, in the extracellular region; IPR003020: Bicarbonate transporter, eukaryotic; TMhelix: Region of a membrane-bound protein predicted to be embedded in the membrane.; TRANSMEMBRANE: Region of a…	NA	Membrane function and transporters	other localisation
Ec-00_002650	Harbinger transposase-derived nuclease domain	n/a;n/a;n/a	PTHR22930: ; IPR027806: Harbinger transposase-derived nuclease domain	NA	Transposon or viral gene	other localisation
Ec-00_002660	Hypothetical protein	n/a;n/a;n/a	NA	NA	Unknown	nd
Ec-00_002670	tRNA(Ile)-lysidine/2-thiocytidine synthase	n/a;n/a;n/a	SSF52402: ; PTHR11807: ; IPR011063: tRNA(Ile)-lysidine/2-thiocytidine synthase	NA	Protein synthesis	other localisation
Ec-00_002680	expressed unknown protein	n/a;n/a;n/a	NA	NA	Unknown	other localisation
Ec-00_002690	Adenylyl cyclase class-3/4/guanylyl cyclase	GO:0009190;GO:0035556;GO:0016849	PTHR16305: ; IPR029787: Nucleotide cyclase; IPR001054: Adenylyl cyclase class-3/4/guanylyl cyclase	NA	Cellular regulation and signalling	other localisation
Ec-00_002700	conserved unknown protein	n/a;n/a;n/a	CYTOPLASMIC_DOMAIN: Region of a membrane-bound protein predicted to be outside the membrane, in the cytoplasm.; NON_CYTOPLASMIC_DOMAIN: Region of a membrane-bound protein predicted to be outside the membrane, in the extracellular region; TMhelix: Region of a membrane-bound protein predicted to be embedded in the membrane.; TRANSMEMBRANE: Region of a membrane-bound protein predicted to be embedded…	NA	Unknown	signal anchor
Ec-00_002710	hypothetical protein	n/a;n/a;n/a	CYTOPLASMIC_DOMAIN: Region of a membrane-bound protein predicted to be outside the membrane, in the cytoplasm.; NON_CYTOPLASMIC_DOMAIN: Region of a membrane-bound protein predicted to be outside the membrane, in the extracellular region; TRANSMEMBRANE: Region of a membrane-bound protein predicted to be embedded in the membrane.	NA	Unknown	signal peptide
Ec-00_002720	Kinesin light chain	GO:0005515;GO:0003777;GO:0005871	PF13424: Tetratricopeptide repeat; SSF48452: ; IPR002151: Kinesin light chain; IPR011990: Tetratricopeptide-like helical domain; PTHR19959: ; PF13374: Tetratricopeptide repeat; IPR013026: Tetratricopeptide repeat-containing domain; IPR019734: Tetratricopeptide repeat	NA	Cytoskeleton and flagella	other localisation
Ec-00_002730	hypothetical protein	n/a;n/a;n/a	CYTOPLASMIC_DOMAIN: Region of a membrane-bound protein predicted to be outside the membrane, in the cytoplasm.; NON_CYTOPLASMIC_DOMAIN: Region of a membrane-bound protein predicted to be outside the membrane, in the extracellular region; TRANSMEMBRANE: Region of a membrane-bound protein predicted to be embedded in the membrane.	NA	Unknown	other localisation
Ec-00_002740	expressed unknown protein	n/a;n/a;n/a	NA	NA	Unknown	other localisation
Ec-00_002750	expressed unknown protein	n/a;n/a;n/a	NA	NA	Unknown	nd
Ec-00_002760	copper/zinc superoxide dismutase	GO:0006801;GO:0055114;GO:0046872	PTHR10003: ; IPR001424: Superoxide dismutase, copper/zinc binding domain	KOG0441	Metabolism	other localisation
Ec-00_002770	P-type ATPase (PMID 12707717)	GO:0005524;GO:0006754;GO:0006810;GO:0015662;GO:0016020	CYTOPLASMIC_DOMAIN: Region of a membrane-bound protein predicted to be outside the membrane, in the cytoplasm.; NON_CYTOPLASMIC_DOMAIN: Region of a membrane-bound protein predicted to be outside the membrane, in the extracellular region; TMhelix: Region of a membrane-bound protein predicted to be embedded in the membrane.; TRANSMEMBRANE: Region of a membrane-bound protein predicted to be embedded…	NA	Membrane function and transporters	nd
Ec-00_002780	hypothetical protein	n/a;n/a;n/a	CYTOPLASMIC_DOMAIN: Region of a membrane-bound protein predicted to be outside the membrane, in the cytoplasm.; NON_CYTOPLASMIC_DOMAIN: Region of a membrane-bound protein predicted to be outside the membrane, in the extracellular region; TMhelix: Region of a membrane-bound protein predicted to be embedded in the membrane.; TRANSMEMBRANE: Region of a membrane-bound protein predicted to be embedded…	NA	Unknown	other localisation
Ec-00_002790	hypothetical protein	n/a;n/a;n/a	NA	NA	Unknown	other localisation
Ec-00_002800	hypothetical protein	n/a;n/a;n/a	SignalP-TM:	NA	Unknown	other localisation
Ec-00_002810	hypothetical protein	n/a;n/a;n/a	NA	NA	Unknown	other localisation
Ec-00_002820	Cystathionine beta-lyase,	GO:0003824;GO:0030170	IPR015424: Pyridoxal phosphate-dependent transferase; SignalP-noTM: ; IPR000277: Cys/Met metabolism, pyridoxal phosphate-dependent enzyme; IPR006238: Cystathionine beta-lyase, eukaryotic; IPR015422: Pyridoxal phosphate-dependent transferase, major region, subdomain 2	KOG0053	Metabolism	other localisation
Ec-00_002830	Armadillo-like helical	GO:0005488	IPR011989: Armadillo-like helical; IPR016024: Armadillo-type fold	NA	Cellular regulation and signalling	other localisation
Ec-00_002840	conserved unknown protein	n/a;n/a;n/a	PTHR10663:	NA	Unknown	other localisation
Ec-00_002850	Hypothetical protein	n/a;n/a;n/a	NA	NA	Unknown	nd
Ec-00_002870	expressed unknown protein	n/a;n/a;n/a	NA	NA	Unknown	other localisation
Ec-00_002880	Hypothetical protein	n/a;n/a;n/a	NON_CYTOPLASMIC_DOMAIN: Region of a membrane-bound protein predicted to be outside the membrane, in the extracellular region; SIGNAL_PEPTIDE: Signal peptide region; SIGNAL_PEPTIDE_N_REGION: N-terminal region of a signal peptide.; SIGNAL_PEPTIDE_H_REGION: Hydrophobic region of a signal peptide.; SIGNAL_PEPTIDE_C_REGION: C-terminal region of a signal peptide.	NA	Unknown	nd
Ec-00_002890	hypothetical protein	n/a;n/a;n/a	NA	NA	Unknown	nd
Ec-00_002900	expressed unknown protein	n/a;n/a;n/a	NA	NA	Unknown	other localisation
Ec-00_002910	hypothetical protein	n/a;n/a;n/a	CYTOPLASMIC_DOMAIN: Region of a membrane-bound protein predicted to be outside the membrane, in the cytoplasm.; NON_CYTOPLASMIC_DOMAIN: Region of a membrane-bound protein predicted to be outside the membrane, in the extracellular region; TMhelix: Region of a membrane-bound protein predicted to be embedded in the membrane.; TRANSMEMBRANE: Region of a membrane-bound protein predicted to be embedded…	NA	Unknown	other localisation
Ec-00_002920	EsV-1-199	n/a;GO:0005515	IPR020683: Ankyrin repeat-containing domain; PTHR24198: ; IPR002110: Ankyrin repeat	NA	Membrane function and transporters	other localisation
Ec-00_002930	hypothetical protein	n/a;n/a;n/a	NA	NA	Unknown	nd
Ec-00_002940	AMP-dependent synthetase/ligase	GO:0008152;GO:0003824	G3DSA:3.40.50.980: ; TMhelix: Region of a membrane-bound protein predicted to be embedded in the membrane.; PTHR24096: ; IPR000873: AMP-dependent synthetase/ligase; SSF56801:	NA	Metabolism	other localisation
Ec-00_002950	General substrate transporter	GO:0055085;GO:0016021;GO:0022857	IPR005829: Sugar transporter, conserved site; IPR005828: General substrate transporter; TMhelix: Region of a membrane-bound protein predicted to be embedded in the membrane.; CYTOPLASMIC_DOMAIN: Region of a membrane-bound protein predicted to be outside the membrane, in the cytoplasm.; IPR020846: Major facilitator superfamily domain; NON_CYTOPLASMIC_DOMAIN: Region of a membrane-bound protein pred…	NA	Membrane function and transporters	other localisation
Ec-00_002960	Hypothetical protein	n/a;n/a;n/a	TMhelix: Region of a membrane-bound protein predicted to be embedded in the membrane.; SIGNAL_PEPTIDE: Signal peptide region; SIGNAL_PEPTIDE_N_REGION: N-terminal region of a signal peptide.; SignalP-TM: ; SIGNAL_PEPTIDE_C_REGION: C-terminal region of a signal peptide.; CYTOPLASMIC_DOMAIN: Region of a membrane-bound protein predicted to be outside the membrane, in the cytoplasm.; NON_CYTOPLASMIC_D…	NA	Unknown	nd
Ec-00_002970	expressed unknown protein	n/a;n/a;n/a	NA	NA	Unknown	other localisation
Ec-00_003000	expressed unknown protein	n/a;n/a;n/a	NA	NA	Unknown	other localisation
Ec-00_003010	hypothetical protein	GO:0008152;GO:0016491;n/a	NA	NA	Unknown	other localisation
Ec-00_003030	hypothetical protein	GO:0003777;GO:0007018;n/a	IPR013602: Dynein heavy chain, domain-2; Coil: ; IPR026983: Dynein heavy chain	NA	Unknown	other localisation
Ec-00_003040	hypothetical protein	n/a;n/a;n/a	CYTOPLASMIC_DOMAIN: Region of a membrane-bound protein predicted to be outside the membrane, in the cytoplasm.; NON_CYTOPLASMIC_DOMAIN: Region of a membrane-bound protein predicted to be outside the membrane, in the extracellular region; TRANSMEMBRANE: Region of a membrane-bound protein predicted to be embedded in the membrane.	NA	Unknown	other localisation
Ec-00_003050	expressed unknown protein	n/a;n/a;n/a	NA	NA	Unknown	other localisation
Ec-00_003060	Ion transport domain	GO:0016020;GO:0055085;GO:0006811;GO:0005216	CYTOPLASMIC_DOMAIN: Region of a membrane-bound protein predicted to be outside the membrane, in the cytoplasm.; SSF81324: ; PTHR10217: ; NON_CYTOPLASMIC_DOMAIN: Region of a membrane-bound protein predicted to be outside the membrane, in the extracellular region; G3DSA:1.10.287.70: ; IPR005821: Ion transport domain; TRANSMEMBRANE: Region of a membrane-bound protein predicted to be embedded in the …	NA	Membrane function and transporters	other localisation
Ec-00_003070	expressed unknown protein	n/a;n/a;n/a	NA	NA	Unknown	nd
Ec-00_003080	hypothetical protein	n/a;n/a;n/a	Coil:	NA	Unknown	other localisation
Ec-00_003090	Hypothetical protein	n/a;n/a;n/a	NA	NA	Unknown	nd
Ec-00_003120	hypothetical protein	n/a;n/a;n/a	NA	NA	Unknown	other localisation
Ec-00_003130	hypothetical protein	n/a;n/a;n/a	CYTOPLASMIC_DOMAIN: Region of a membrane-bound protein predicted to be outside the membrane, in the cytoplasm.; NON_CYTOPLASMIC_DOMAIN: Region of a membrane-bound protein predicted to be outside the membrane, in the extracellular region; TMhelix: Region of a membrane-bound protein predicted to be embedded in the membrane.; TRANSMEMBRANE: Region of a membrane-bound protein predicted to be embedded…	NA	Unknown	other localisation
Ec-00_003140	hypothetical protein	n/a;n/a;n/a	NA	NA	Unknown	other localisation
Ec-00_003150	hypothetical protein	n/a;n/a;n/a	NA	NA	Unknown	nd
Ec-00_003160	DNA-directed RNA polymerase, subunit 2	GO:0032549;GO:0003677;GO:0006351;GO:0003899	IPR015712: DNA-directed RNA polymerase, subunit 2; SSF64484: ; IPR007644: RNA polymerase, beta subunit, protrusion; G3DSA:3.90.1100.10:	NA	Transcription	other localisation
Ec-00_003170	hypothetical protein	n/a;n/a;n/a	CYTOPLASMIC_DOMAIN: Region of a membrane-bound protein predicted to be outside the membrane, in the cytoplasm.; NON_CYTOPLASMIC_DOMAIN: Region of a membrane-bound protein predicted to be outside the membrane, in the extracellular region; TMhelix: Region of a membrane-bound protein predicted to be embedded in the membrane.; TRANSMEMBRANE: Region of a membrane-bound protein predicted to be embedded…	NA	Unknown	signal anchor
Ec-00_003180	Metallo-dependent phosphatase-like	n/a;n/a;n/a	IPR029052: Metallo-dependent phosphatase-like	NA	Cellular regulation and signalling	other localisation
Ec-00_003190	Peptidase C48, SUMO/Sentrin/Ubl1	GO:0008234;GO:0006508	IPR003653: Peptidase C48, SUMO/Sentrin/Ubl1; SSF54001: ; G3DSA:3.30.310.130:	NA	Proteolysis	other localisation
Ec-00_003200	expressed unknown protein	n/a;n/a;n/a	NA	NA	Unknown	nd
Ec-00_003210	DNA polymerase epsilon catalytic subunit	GO:0003677;GO:0003887;GO:0006260;GO:0006281;GO:0008622	IPR006133: DNA-directed DNA polymerase, family B, exonuclease domain; SIGNAL_PEPTIDE: Signal peptide region; SIGNAL_PEPTIDE_N_REGION: N-terminal region of a signal peptide.; PTHR10670:SF0: ; SIGNAL_PEPTIDE_C_REGION: C-terminal region of a signal peptide.; NON_CYTOPLASMIC_DOMAIN: Region of a membrane-bound protein predicted to be outside the membrane, in the extracellular region; SignalP-noTM: ; I…	NA	DNA or chromatin modification	signal peptide
Ec-00_003220	hypothetical protein	n/a;n/a;n/a	NA	NA	Unknown	other localisation
Ec-00_003230	Hypothetical protein	n/a;n/a;n/a	NA	NA	Unknown	nd
Ec-00_003240	expressed unknown protein	n/a;n/a;n/a	NA	NA	Unknown	other localisation
Ec-00_003250	Hypothetical protein	GO:0000160;GO:0004871;n/a	NON_CYTOPLASMIC_DOMAIN: Region of a membrane-bound protein predicted to be outside the membrane, in the extracellular region; IPR008207: Signal transduction histidine kinase, phosphotransfer (Hpt) domain; SIGNAL_PEPTIDE: Signal peptide region; SIGNAL_PEPTIDE_H_REGION: Hydrophobic region of a signal peptide.; SIGNAL_PEPTIDE_C_REGION: C-terminal region of a signal peptide.	NA	Unknown	mitochondrion
Ec-00_003260	expressed unknown protein	n/a;n/a;n/a	NA	NA	Unknown	other localisation
Ec-00_003265	Cytochrome b5-like heme/steroid binding domain	GO:0020037	CYTOPLASMIC_DOMAIN: Region of a membrane-bound protein predicted to be outside the membrane, in the cytoplasm.; NON_CYTOPLASMIC_DOMAIN: Region of a membrane-bound protein predicted to be outside the membrane, in the extracellular region; PTHR10281:SF26: ; PTHR10281: ; TMhelix: Region of a membrane-bound protein predicted to be embedded in the membrane.; IPR001199: Cytochrome b5-like heme/steroid …	NA	Respiration	signal anchor
Ec-00_003270	Cytochrome b5-like heme/steroid binding domain	GO:0020037	CYTOPLASMIC_DOMAIN: Region of a membrane-bound protein predicted to be outside the membrane, in the cytoplasm.; NON_CYTOPLASMIC_DOMAIN: Region of a membrane-bound protein predicted to be outside the membrane, in the extracellular region; PTHR10281:SF26: ; PTHR10281: ; TMhelix: Region of a membrane-bound protein predicted to be embedded in the membrane.; IPR001199: Cytochrome b5-like heme/steroid …	NA	Respiration	signal anchor
Ec-00_003280	EF-hand domain pair	n/a;n/a;n/a	IPR011992: EF-hand domain pair	NA	Cellular regulation and signalling	other localisation
Ec-00_003290	Sphingomyelin synthase-like domain	n/a;n/a;n/a	CYTOPLASMIC_DOMAIN: Region of a membrane-bound protein predicted to be outside the membrane, in the cytoplasm.; NON_CYTOPLASMIC_DOMAIN: Region of a membrane-bound protein predicted to be outside the membrane, in the extracellular region; PTHR21290: ; TMhelix: Region of a membrane-bound protein predicted to be embedded in the membrane.; IPR025749: Sphingomyelin synthase-like domain; TRANSMEMBRANE:…	NA	Metabolism	other localisation
Ec-00_003300	hypothetical protein	n/a;n/a;n/a	Coil:	NA	Unknown	other localisation
Ec-00_003310	Hypothetical protein	n/a;n/a;n/a	NA	NA	Unknown	other localisation
Ec-00_003320	conserved unknown protein	n/a;n/a;n/a	Coil:	NA	Unknown	other localisation
Ec-00_003330	Similar to Iron-containing Alcohol Dehydrogenase	GO:0055114;GO:0046872;GO:0016491	SSF56796: ; PTHR11496: ; IPR001670: Alcohol dehydrogenase, iron-type; G3DSA:3.40.50.1970:	NA	Metabolism	other localisation
Ec-00_003340	Transthyretin/hydroxyisourate hydrolase, superfamily	GO:0005496;GO:0006810	IPR023416: Transthyretin/hydroxyisourate hydrolase, superfamily; IPR023419: Transthyretin, conserved site; PTHR10395:	NA	Metabolism	other localisation
Ec-00_003350	pyruvate dehydrogenase E1 component subunit beta	NA	G3DSA:2.40.50.100: ; PTHR23151: ; IPR011053: Single hybrid motif; IPR000089: Biotin/lipoyl attachment	KOG0557	Metabolism	mitochondrion
Ec-00_003360	General transcription factor II H, polypeptide 2	GO:0000439;GO:0006289;GO:0006351	SSF57889: ; IPR007198: Ssl1-like; IPR012170: TFIIH subunit Ssl1/p44; G3DSA:3.10.370.10: ; IPR007087: Zinc finger, C2H2; PTHR12695: ; IPR004595: TFIIH C1-like domain; IPR002035: von Willebrand factor, type A	KOG2807	Transcription	other localisation
Ec-00_003370	methionine sulfoxide reductase	GO:0055114;GO:0008113	SIGNAL_PEPTIDE: Signal peptide region; SIGNAL_PEPTIDE_N_REGION: N-terminal region of a signal peptide.; IPR002569: Peptide methionine sulphoxide reductase MsrA; SIGNAL_PEPTIDE_C_REGION: C-terminal region of a signal peptide.; SignalP-TM: ; NON_CYTOPLASMIC_DOMAIN: Region of a membrane-bound protein predicted to be outside the membrane, in the extracellular region; SignalP-noTM: ; IPR028427: Peptid…	KOG1635	Metabolism	chloroplast
Ec-00_003380	von Willebrand factor, type A	n/a;n/a;n/a	PTHR14187: ; IPR004166: MHCK/EF2 kinase; PF13519: von Willebrand factor type A domain; IPR002035: von Willebrand factor, type A; IPR011009: Protein kinase-like domain	NA	Cell wall and extracellular	other localisation
Ec-00_003390	Zinc finger, RING-type	GO:0005515;GO:0008270	CYTOPLASMIC_DOMAIN: Region of a membrane-bound protein predicted to be outside the membrane, in the cytoplasm.; NON_CYTOPLASMIC_DOMAIN: Region of a membrane-bound protein predicted to be outside the membrane, in the extracellular region; SSF57850: ; IPR001841: Zinc finger, RING-type; IPR013083: Zinc finger, RING/FYVE/PHD-type; TRANSMEMBRANE: Region of a membrane-bound protein predicted to be embe…	NA	Proteolysis	other localisation
Ec-00_003400	Zinc finger, RING/FYVE/PHD-type	n/a;n/a;n/a	IPR001841: Zinc finger, RING-type; TMhelix: Region of a membrane-bound protein predicted to be embedded in the membrane.; SignalP-TM: ; CYTOPLASMIC_DOMAIN: Region of a membrane-bound protein predicted to be outside the membrane, in the cytoplasm.; PTHR14155: ; NON_CYTOPLASMIC_DOMAIN: Region of a membrane-bound protein predicted to be outside the membrane, in the extracellular region; SSF57850: ; …	NA	Cellular regulation and signalling	other localisation
Ec-00_003410	Beta-grasp domain	n/a;n/a;n/a	IPR001041: 2Fe-2S ferredoxin-type domain; IPR012675: Beta-grasp domain; PTHR23426:	NA	Metabolism	mitochondrion
Ec-00_003420	expressed unknown protein	n/a;n/a;n/a	NA	NA	Unknown	mitochondrion
Ec-00_003430	conserved unknown protein	n/a;n/a;n/a	CYTOPLASMIC_DOMAIN: Region of a membrane-bound protein predicted to be outside the membrane, in the cytoplasm.; NON_CYTOPLASMIC_DOMAIN: Region of a membrane-bound protein predicted to be outside the membrane, in the extracellular region; TMhelix: Region of a membrane-bound protein predicted to be embedded in the membrane.; PTHR21236: ; TRANSMEMBRANE: Region of a membrane-bound protein predicted t…	NA	Unknown	other localisation
Ec-00_003440	Leucine rich repeat receptor kinase	GO:0004713;GO:0006468	IPR017441: Protein kinase, ATP binding site; IPR002290: Serine/threonine/dual specificity protein kinase, catalytic domain; IPR001611: Leucine-rich repeat; SIGNAL_PEPTIDE_N_REGION: N-terminal region of a signal peptide.; IPR011009: Protein kinase-like domain; PTHR23257: ; NON_CYTOPLASMIC_DOMAIN: Region of a membrane-bound protein predicted to be outside the membrane, in the extracellular region; …	NA	Cellular regulation and signalling	signal peptide
Ec-00_003450	Hypothetical protein	n/a;n/a;n/a	NA	NA	Unknown	nd
Ec-00_003460	putative tRNA methyltransferase	n/a;GO:0006400;GO:0008176	IPR003358: tRNA (guanine-N-7) methyltransferase, Trmb type	NA	Protein synthesis	other localisation
Ec-00_003470	Potassium channel	GO:0006813	PTHR10027: ; G3DSA:1.10.287.70: ; TMhelix: Region of a membrane-bound protein predicted to be embedded in the membrane.; CYTOPLASMIC_DOMAIN: Region of a membrane-bound protein predicted to be outside the membrane, in the cytoplasm.; SSF81324: ; NON_CYTOPLASMIC_DOMAIN: Region of a membrane-bound protein predicted to be outside the membrane, in the extracellular region; IPR016040: NAD(P)-binding do…	NA	Membrane function and transporters	signal anchor
Ec-00_003480	expressed unknown protein	GO:0003824;GO:0009058;GO:0030170	Coil:	NA	Unknown	other localisation
Ec-00_003490	D1LIC, cytoplasmic dynein 1 light intermediate chain	GO:0007018;GO:0003774;GO:0005868;GO:0003777	IPR027417: P-loop containing nucleoside triphosphate hydrolase; IPR022780: Dynein family light intermediate chain; IPR008467: Dynein 1 light intermediate chain	NA	Cytoskeleton and flagella	other localisation
Ec-00_003500	expressed unknown protein	GO:0000166;GO:0004812;GO:0005524;GO:0005737;GO:0006412;GO:0006418	CYTOPLASMIC_DOMAIN: Region of a membrane-bound protein predicted to be outside the membrane, in the cytoplasm.; NON_CYTOPLASMIC_DOMAIN: Region of a membrane-bound protein predicted to be outside the membrane, in the extracellular region; TMhelix: Region of a membrane-bound protein predicted to be embedded in the membrane.; TRANSMEMBRANE: Region of a membrane-bound protein predicted to be embedded…	NA	Unknown	mitochondrion
Ec-00_003510	Hypothetical protein	n/a;n/a;n/a	NON_CYTOPLASMIC_DOMAIN: Region of a membrane-bound protein predicted to be outside the membrane, in the extracellular region; SIGNAL_PEPTIDE: Signal peptide region; SIGNAL_PEPTIDE_N_REGION: N-terminal region of a signal peptide.; Coil: ; SIGNAL_PEPTIDE_H_REGION: Hydrophobic region of a signal peptide.; SIGNAL_PEPTIDE_C_REGION: C-terminal region of a signal peptide.	NA	Unknown	other localisation
Ec-00_003520	ER lumen protein retaining receptor	GO:0006621;GO:0016021;GO:0046923	CYTOPLASMIC_DOMAIN: Region of a membrane-bound protein predicted to be outside the membrane, in the cytoplasm.; NON_CYTOPLASMIC_DOMAIN: Region of a membrane-bound protein predicted to be outside the membrane, in the extracellular region; TMhelix: Region of a membrane-bound protein predicted to be embedded in the membrane.; IPR000133: ER lumen protein retaining receptor; TRANSMEMBRANE: Region of a…	NA	Membrane function and transporters	other localisation
Ec-00_003530	Biotin/lipoate A/B protein ligase	GO:0004077;GO:0006464	SSF55681: ; NON_CYTOPLASMIC_DOMAIN: Region of a membrane-bound protein predicted to be outside the membrane, in the extracellular region; SIGNAL_PEPTIDE: Signal peptide region; IPR004143: Biotinyl protein ligase (BPL) and lipoyl protein ligase (LPL), catalytic domain; G3DSA:3.30.930.10: ; SIGNAL_PEPTIDE_N_REGION: N-terminal region of a signal peptide.; SIGNAL_PEPTIDE_H_REGION: Hydrophobic region …	NA	Protein binding or modification	signal peptide
Ec-00_003540	hypothetical protein	GO:0005488	Coil:	NA	Unknown	mitochondrion
Ec-00_003550	hypothetical protein	n/a;n/a;n/a	Coil:	NA	Unknown	other localisation
Ec-00_003560	PCI domain protein	n/a;n/a;n/a	SSF48452: ; IPR000717: Proteasome component (PCI) domain; IPR011991: Winged helix-turn-helix DNA-binding domain; SSF46785: ; PTHR10678: ; IPR011990: Tetratricopeptide-like helical domain; IPR013143: PCI/PINT associated module	NA	Proteolysis	other localisation
Ec-00_003570	Hypothetical protein	n/a;n/a;n/a	NA	NA	Unknown	nd
Ec-00_003580	hypothetical protein	n/a;n/a;n/a	NON_CYTOPLASMIC_DOMAIN: Region of a membrane-bound protein predicted to be outside the membrane, in the extracellular region; SignalP-noTM: ; SIGNAL_PEPTIDE: Signal peptide region; PS51257: Prokaryotic membrane lipoprotein lipid attachment site profile.; SIGNAL_PEPTIDE_N_REGION: N-terminal region of a signal peptide.; SIGNAL_PEPTIDE_H_REGION: Hydrophobic region of a signal peptide.; SIGNAL_PEPTID…	NA	Unknown	signal peptide
Ec-00_003590	hypothetical protein	n/a;n/a;n/a	NA	NA	Unknown	nd
Ec-00_003600	DNA helicase Pif1 like	GO:0000723;GO:0003678;GO:0006281	PTHR10492:SF17: ; IPR027417: P-loop containing nucleoside triphosphate hydrolase; PTHR10492: ; IPR010285: DNA helicase Pif1-like	NA	DNA or chromatin modification	other localisation
Ec-00_003620	expressed unknown protein	n/a;n/a;n/a	PTHR22930:	NA	Unknown	other localisation
Ec-00_003640	hypothetical protein	n/a;n/a;n/a	NA	NA	Unknown	other localisation
Ec-00_003650	expressed unknown protein	n/a;n/a;n/a	NA	NA	Unknown	other localisation
Ec-00_003660	expressed unknown protein	n/a;n/a;n/a	NA	NA	Unknown	other localisation
Ec-00_003670	hypothetical protein	n/a;n/a;n/a	NA	NA	Unknown	other localisation
Ec-00_003680	Hypothetical protein	n/a;n/a;n/a	NA	NA	Unknown	other localisation
Ec-00_003690	expressed unknown protein	GO:0004181;GO:0004182;GO:0006508;GO:0008270	NA	NA	Unknown	other localisation
Ec-00_003700	hypothetical protein	n/a;n/a;n/a	NA	NA	Unknown	other localisation
Ec-00_003710	expressed unknown protein	n/a;n/a;n/a	NA	NA	Unknown	other localisation
Ec-00_003720	DNA helicase Pif1 like	GO:0006281;GO:0003678;GO:0000723	IPR027417: P-loop containing nucleoside triphosphate hydrolase; PTHR23274: ; IPR010285: DNA helicase Pif1-like	NA	DNA or chromatin modification	other localisation
Ec-00_003730	expressed unknown protein	n/a;n/a;n/a	NA	NA	Unknown	other localisation
Ec-00_003740	Harbinger transposase-derived protein, plant	GO:0016788	IPR006912: Harbinger transposase-derived protein; PTHR22930:	NA	Transposon or viral gene	other localisation
Ec-00_003750	hypothetical protein	n/a;n/a;n/a	NA	NA	Unknown	other localisation
Ec-00_003760	hypothetical protein	n/a;n/a;n/a	CYTOPLASMIC_DOMAIN: Region of a membrane-bound protein predicted to be outside the membrane, in the cytoplasm.; NON_CYTOPLASMIC_DOMAIN: Region of a membrane-bound protein predicted to be outside the membrane, in the extracellular region; TMhelix: Region of a membrane-bound protein predicted to be embedded in the membrane.; TRANSMEMBRANE: Region of a membrane-bound protein predicted to be embedded…	NA	Unknown	other localisation
Ec-00_003770	hypothetical protein	n/a;n/a;n/a	NON_CYTOPLASMIC_DOMAIN: Region of a membrane-bound protein predicted to be outside the membrane, in the extracellular region; SIGNAL_PEPTIDE: Signal peptide region; SignalP-noTM: ; SIGNAL_PEPTIDE_N_REGION: N-terminal region of a signal peptide.; Coil: ; SIGNAL_PEPTIDE_H_REGION: Hydrophobic region of a signal peptide.; SIGNAL_PEPTIDE_C_REGION: C-terminal region of a signal peptide.	NA	Unknown	signal peptide
Ec-00_003780	hypothetical protein	n/a;n/a;n/a	NA	NA	Unknown	other localisation
Ec-00_003790	hypothetical protein	n/a;n/a;n/a	NA	NA	Unknown	mitochondrion
Ec-00_003800	conserved unknown protein	n/a;n/a;n/a	NA	NA	Unknown	other localisation
Ec-00_003810	hypothetical protein	n/a;n/a;n/a	NA	NA	Unknown	other localisation
Ec-00_003820	MULE transposase domain	GO:0006355;GO:0008270	IPR018289: MULE transposase domain; IPR031052: FHY3/FAR1 family	NA	Transposon or viral gene	other localisation
Ec-00_003830	Hypothetical protein	n/a;n/a;n/a	NA	NA	Unknown	other localisation
Ec-00_003840	hypothetical protein	n/a;n/a;n/a	NA	NA	Unknown	other localisation
Ec-00_003850	hypothetical protein	n/a;n/a;n/a	Coil:	NA	Unknown	other localisation
Ec-00_003860	hypothetical protein	n/a;n/a;n/a	mobidb-lite: consensus disorder prediction	NA	Unknown	other localisation
Ec-00_003870	expressed unknown protein	n/a;n/a;n/a	NA	NA	Unknown	nd
Ec-00_003880	hypothetical protein	n/a;n/a;n/a	NA	NA	Unknown	other localisation
Ec-00_003890	hypothetical protein	n/a;n/a;n/a	NA	NA	Unknown	other localisation
Ec-00_003900	Hypothetical protein	n/a;n/a;n/a	NA	NA	Unknown	other localisation
Ec-00_003910	Harbinger transposase-derived nuclease domain	GO:0005215;GO:0005488;GO:0006810	PTHR22930: ; IPR027806: Harbinger transposase-derived nuclease domain	NA	Transposon or viral gene	other localisation
Ec-00_003920	expressed unknown protein	n/a;n/a;n/a	Coil:	NA	Unknown	other localisation
Ec-00_003930	hypothetical protein	n/a;n/a;n/a	NA	NA	Unknown	other localisation
Ec-00_003940	hypothetical protein	n/a;n/a;n/a	NA	NA	Unknown	other localisation
Ec-00_003950	hypothetical protein	n/a;n/a;n/a	NA	NA	Unknown	other localisation
Ec-00_003960	Hypothetical protein	n/a;n/a;n/a	IPR005331: Sulfotransferase	NA	Unknown	other localisation
Ec-00_003970	expressed unknown protein	n/a;n/a;n/a	NA	NA	Unknown	other localisation
Ec-00_003990	hypothetical protein	n/a;n/a;n/a	SignalP-TM:	NA	Unknown	other localisation
Ec-00_004000	Sulfotransferase	GO:0008146;GO:0016021	SIGNAL_PEPTIDE: Signal peptide region; TMhelix: Region of a membrane-bound protein predicted to be embedded in the membrane.; IPR027417: P-loop containing nucleoside triphosphate hydrolase; SIGNAL_PEPTIDE_N_REGION: N-terminal region of a signal peptide.; SIGNAL_PEPTIDE_C_REGION: C-terminal region of a signal peptide.; SignalP-TM: ; NON_CYTOPLASMIC_DOMAIN: Region of a membrane-bound protein predic…	NA	Metabolism	signal peptide
Ec-00_004010	hypothetical protein	n/a;n/a;n/a	NA	NA	Unknown	other localisation
Ec-00_004020	expressed unknown protein	n/a;n/a;n/a	Coil:	NA	Unknown	other localisation
Ec-00_004030	hypothetical protein	GO:0005509	NA	NA	Unknown	other localisation
Ec-00_004040	expressed unknown protein	n/a;n/a;n/a	NA	NA	Unknown	other localisation
Ec-00_004050	hypothetical protein	n/a;n/a;n/a	NON_CYTOPLASMIC_DOMAIN: Region of a membrane-bound protein predicted to be outside the membrane, in the extracellular region; SignalP-noTM: ; SIGNAL_PEPTIDE: Signal peptide region; SIGNAL_PEPTIDE_N_REGION: N-terminal region of a signal peptide.; SIGNAL_PEPTIDE_H_REGION: Hydrophobic region of a signal peptide.; SIGNAL_PEPTIDE_C_REGION: C-terminal region of a signal peptide.	NA	Unknown	other localisation
Ec-00_004060	hypothetical protein	n/a;n/a;n/a	NA	NA	Unknown	other localisation
Ec-00_004070	Hypothetical protein	n/a;n/a;n/a	NA	NA	Unknown	other localisation
Ec-00_004080	hypothetical protein	n/a;n/a;n/a	NA	NA	Unknown	other localisation
Ec-00_004090	hypothetical protein	n/a;n/a;n/a	NA	NA	Unknown	other localisation
Ec-00_004100	expressed unknown protein	n/a;n/a;n/a	NA	NA	Unknown	other localisation
Ec-00_004110	DDE superfamily endonuclease, CENP-B-like	GO:0003676	IPR004875: DDE superfamily endonuclease, CENP-B-like; PTHR19303:	NA	DNA or chromatin modification	other localisation
Ec-00_004120	Hypothetical protein	n/a;n/a;n/a	NA	NA	Unknown	other localisation
Ec-00_004130	expressed unknown protein	n/a;n/a;n/a	NA	NA	Unknown	other localisation
Ec-00_004140	Hypothetical protein	n/a;n/a;n/a	CYTOPLASMIC_DOMAIN: Region of a membrane-bound protein predicted to be outside the membrane, in the cytoplasm.; NON_CYTOPLASMIC_DOMAIN: Region of a membrane-bound protein predicted to be outside the membrane, in the extracellular region; TMhelix: Region of a membrane-bound protein predicted to be embedded in the membrane.; TRANSMEMBRANE: Region of a membrane-bound protein predicted to be embedded…	NA	Unknown	signal anchor
Ec-00_004150	Hypothetical protein	n/a;n/a;n/a	NA	NA	Unknown	mitochondrion
Ec-00_004160	Nucleotide-diphospho-sugar transferase	n/a;n/a;n/a	IPR005069: Nucleotide-diphospho-sugar transferase	NA	Metabolism	other localisation
Ec-00_004180	expressed unknown protein	n/a;n/a;n/a	NA	NA	Unknown	other localisation
Ec-00_004190	hypothetical protein	n/a;n/a;n/a	Coil:	NA	Unknown	other localisation
Ec-00_004200	hypothetical protein	n/a;n/a;n/a	NA	NA	Unknown	other localisation
Ec-00_004210	hypothetical protein	n/a;n/a;n/a	Coil:	NA	Unknown	other localisation
Ec-00_004220	conserved unknown protein	n/a;n/a;n/a	NON_CYTOPLASMIC_DOMAIN: Region of a membrane-bound protein predicted to be outside the membrane, in the extracellular region; SignalP-noTM: ; SIGNAL_PEPTIDE: Signal peptide region; SIGNAL_PEPTIDE_N_REGION: N-terminal region of a signal peptide.; SIGNAL_PEPTIDE_H_REGION: Hydrophobic region of a signal peptide.; SignalP-TM: ; SIGNAL_PEPTIDE_C_REGION: C-terminal region of a signal peptide.	NA	Unknown	signal peptide
Ec-00_004230	Hypothetical protein	n/a;n/a;n/a	NA	NA	Unknown	other localisation
Ec-00_004240	RGS domain	GO:0038032	IPR016137: RGS domain	NA	Cellular regulation and signalling	other localisation
Ec-00_004250	Hypothetical protein	n/a;n/a;n/a	NA	NA	Unknown	nd
Ec-00_004260	RGS domain	GO:0038032	IPR016137: RGS domain	NA	Cellular regulation and signalling	other localisation
Ec-00_004270	Hypothetical protein	n/a;n/a;n/a	NA	NA	Unknown	nd
Ec-00_004280	expressed unknown protein	n/a;n/a;n/a	TMhelix: Region of a membrane-bound protein predicted to be embedded in the membrane.; SIGNAL_PEPTIDE: Signal peptide region; SIGNAL_PEPTIDE_N_REGION: N-terminal region of a signal peptide.; SignalP-TM: ; SIGNAL_PEPTIDE_C_REGION: C-terminal region of a signal peptide.; CYTOPLASMIC_DOMAIN: Region of a membrane-bound protein predicted to be outside the membrane, in the cytoplasm.; NON_CYTOPLASMIC_D…	NA	Unknown	chloroplast
Ec-00_004290	Lactate/malate dehydrogenase, C-terminal	GO:0016616;GO:0003824;GO:0055114;GO:0005975	SSF51735: ; SIGNAL_PEPTIDE: Signal peptide region; IPR001236: Lactate/malate dehydrogenase, N-terminal; SIGNAL_PEPTIDE_N_REGION: N-terminal region of a signal peptide.; SIGNAL_PEPTIDE_C_REGION: C-terminal region of a signal peptide.; IPR010945: Malate dehydrogenase, type 2; NON_CYTOPLASMIC_DOMAIN: Region of a membrane-bound protein predicted to be outside the membrane, in the extracellular region…	NA	Metabolism	signal peptide
Ec-00_004300	lipase	NA	CYTOPLASMIC_DOMAIN: Region of a membrane-bound protein predicted to be outside the membrane, in the cytoplasm.; NON_CYTOPLASMIC_DOMAIN: Region of a membrane-bound protein predicted to be outside the membrane, in the extracellular region; PTHR11005:SF9: ; IPR029058: Alpha/Beta hydrolase fold; IPR025483: Lipase, eukaryotic; TMhelix: Region of a membrane-bound protein predicted to be embedded in the…	KOG2624	Metabolism	signal peptide
Ec-00_004310	Serine O-acetyltransferase	GO:0006535;GO:0009001;GO:0005737	NA	KOG4750	Metabolism	signal peptide
Ec-00_004320	expressed unknown protein	n/a;n/a;n/a	NA	NA	Unknown	other localisation
Ec-00_004330	Beta-lactamase-like	GO:0016787	PTHR11635: ; IPR000595: Cyclic nucleotide-binding domain; PTHR11635:SF151: ; mobidb-lite: consensus disorder prediction; IPR001279: Metallo-beta-lactamase; IPR018490: Cyclic nucleotide-binding-like; cd00038: CAP_ED; IPR014710: RmlC-like jelly roll fold	NA	Metabolism	other localisation
Ec-00_004350	WD40 repeat	GO:0005515	PTHR18359: ; IPR011659: WD40-like Beta Propeller; IPR017986: WD40-repeat-containing domain; IPR015943: WD40/YVTN repeat-like-containing domain; IPR001680: WD40 repeat	NA	Protein binding or modification	other localisation
Ec-00_004360	expressed unknown protein	n/a;n/a;n/a	NA	NA	Unknown	nd
Ec-00_004370	expressed unknown protein	n/a;n/a;n/a	NA	NA	Unknown	other localisation
Ec-00_004380	Hypothetical protein	n/a;n/a;n/a	CYTOPLASMIC_DOMAIN: Region of a membrane-bound protein predicted to be outside the membrane, in the cytoplasm.; NON_CYTOPLASMIC_DOMAIN: Region of a membrane-bound protein predicted to be outside the membrane, in the extracellular region; TMhelix: Region of a membrane-bound protein predicted to be embedded in the membrane.; TRANSMEMBRANE: Region of a membrane-bound protein predicted to be embedded…	NA	Unknown	signal anchor
Ec-00_004400	ankyrin repeat protein	n/a;n/a;n/a	NA	NA	Membrane function and transporters	nd
Ec-00_004410	hypothetical protein	n/a;n/a;n/a	Coil:	NA	Unknown	other localisation
Ec-00_004420	hypothetical protein	n/a;n/a;n/a	NA	NA	Unknown	other localisation
Ec-00_004430	Zinc finger, FYVE/PHD-type	GO:0008270	IPR011011: Zinc finger, FYVE/PHD-type	NA	Cellular regulation and signalling	other localisation
Ec-00_004440	expressed unknown protein	n/a;n/a;n/a	G3DSA:2.170.270.10: ; SSF82199:	NA	Unknown	other localisation
Ec-00_004450	expressed unknown protein	n/a;n/a;n/a	NA	NA	Unknown	other localisation
Ec-00_004460	PiggyBac transposable element-derived protein	n/a;n/a;n/a	IPR029526: PiggyBac transposable element-derived protein	NA	Transposon or viral gene	other localisation
Ec-00_004470	Hypothetical protein	n/a;n/a;n/a	NA	NA	Unknown	other localisation
Ec-00_004480	hypothetical protein	n/a;n/a;n/a	Coil:	NA	Unknown	other localisation
Ec-00_004490	conserved unknown protein	n/a;n/a;n/a	NA	NA	Unknown	mitochondrion
Ec-00_004500	hypothetical protein	n/a;n/a;n/a	NA	NA	Unknown	other localisation
Ec-00_004510	Glycosyl transferase, family 31	GO:0006486;GO:0008378;GO:0016020	IPR005049: Protein of unknown function DUF288; PTHR31362: ; IPR002659: Glycosyl transferase, family 31	NA	Metabolism	other localisation
Ec-00_004520	Conserved unknown protein	GO:0016740	NA	NA	Unknown	other localisation
Ec-00_004530	Hypothetical protein	n/a;n/a;n/a	NA	NA	Unknown	other localisation
Ec-00_004540	expressed unknown protein	n/a;n/a;n/a	Coil:	NA	Unknown	other localisation
Ec-00_004550	Glucose/ribitol dehydrogenase	GO:0008152;GO:0016491	PTHR24322: ; SSF51735: ; IPR016040: NAD(P)-binding domain; IPR002347: Glucose/ribitol dehydrogenase; IPR002198: Short-chain dehydrogenase/reductase SDR	NA	Metabolism	other localisation
Ec-00_004560	Pentatricopeptide repeat	n/a;n/a;n/a	IPR011990: Tetratricopeptide-like helical domain; IPR002885: Pentatricopeptide repeat; PTHR24015:	NA	RNA modification or binding	other localisation
Ec-00_004570	Riboflavin synthase, putative	GO:0009231;GO:0004746	SIGNAL_PEPTIDE: Signal peptide region; IPR023366: ATP synthase subunit alpha-like domain; SIGNAL_PEPTIDE_N_REGION: N-terminal region of a signal peptide.; IPR001783: Lumazine-binding protein; SIGNAL_PEPTIDE_C_REGION: C-terminal region of a signal peptide.; SignalP-TM: ; IPR026017: Lumazine-binding domain; NON_CYTOPLASMIC_DOMAIN: Region of a membrane-bound protein predicted to be outside the membr…	NA	Metabolism	signal peptide
Ec-00_004580	hypothetical protein	n/a;n/a;n/a	NA	NA	Unknown	nd
Ec-00_004590	Riboflavin synthase, putative	NA	Coil:	NA	Metabolism	other localisation
Ec-00_004600	Hypothetical protein	n/a;n/a;n/a	NA	NA	Unknown	other localisation
Ec-00_004610	hypothetical protein	n/a;n/a;n/a	Coil:	NA	Unknown	other localisation
Ec-00_004620	Arv1 protein	n/a;n/a;n/a	CYTOPLASMIC_DOMAIN: Region of a membrane-bound protein predicted to be outside the membrane, in the cytoplasm.; NON_CYTOPLASMIC_DOMAIN: Region of a membrane-bound protein predicted to be outside the membrane, in the extracellular region; TMhelix: Region of a membrane-bound protein predicted to be embedded in the membrane.; IPR007290: Arv1 protein; TRANSMEMBRANE: Region of a membrane-bound protein…	NA	Membrane function and transporters	other localisation
Ec-00_004630	ornithine transcarbamoylase	GO:0016597;GO:0016743;GO:0006520	IPR006132: Aspartate/ornithine carbamoyltransferase, carbamoyl-P binding; IPR006130: Aspartate/ornithine carbamoyltransferase; PTHR11405: ; IPR006131: Aspartate/ornithine carbamoyltransferase, Asp/Orn-binding domain; IPR002292: Ornithine/putrescine carbamoyltransferase	KOG1504	Metabolism	other localisation
Ec-00_004640	RNA recognition motif domain	GO:0003676	IPR000504: RNA recognition motif domain; IPR012677: Nucleotide-binding alpha-beta plait domain; IPR001878: Zinc finger, CCHC-type	NA	RNA modification or binding	other localisation
Ec-00_004650	PIN domain	n/a;n/a;n/a	PTHR16161:SF0: ; PTHR16161: ; IPR002716: PIN domain; IPR029060: PIN domain-like	NA	RNA modification or binding	other localisation
Ec-00_004670	conserved unknown protein	n/a;n/a;n/a	Coil:	NA	Unknown	other localisation
Ec-00_004680	Hypothetical protein	n/a;n/a;n/a	CYTOPLASMIC_DOMAIN: Region of a membrane-bound protein predicted to be outside the membrane, in the cytoplasm.; NON_CYTOPLASMIC_DOMAIN: Region of a membrane-bound protein predicted to be outside the membrane, in the extracellular region; TRANSMEMBRANE: Region of a membrane-bound protein predicted to be embedded in the membrane.	NA	Unknown	nd
Ec-00_004690	conserved unknown protein	n/a;n/a;n/a	NA	NA	Unknown	other localisation
Ec-00_004700	expressed unknown protein	n/a;n/a;n/a	NA	NA	Unknown	other localisation
Ec-00_004720	Hypothetical protein	n/a;n/a;n/a	NA	NA	Unknown	nd
Ec-00_004740	hypothetical protein	n/a;n/a;n/a	NON_CYTOPLASMIC_DOMAIN: Region of a membrane-bound protein predicted to be outside the membrane, in the extracellular region; TMhelix: Region of a membrane-bound protein predicted to be embedded in the membrane.; SIGNAL_PEPTIDE: Signal peptide region; PS51257: Prokaryotic membrane lipoprotein lipid attachment site profile.; SIGNAL_PEPTIDE_N_REGION: N-terminal region of a signal peptide.; SIGNAL_P…	NA	Unknown	signal peptide
Ec-00_004750	expressed unknown protein	n/a;n/a;n/a	NA	NA	Unknown	other localisation
Ec-00_004760	PC-Esterase	n/a;n/a;n/a	IPR026057: PC-Esterase; NON_CYTOPLASMIC_DOMAIN: Region of a membrane-bound protein predicted to be outside the membrane, in the extracellular region; SignalP-noTM: ; SIGNAL_PEPTIDE: Signal peptide region; SIGNAL_PEPTIDE_N_REGION: N-terminal region of a signal peptide.; SIGNAL_PEPTIDE_H_REGION: Hydrophobic region of a signal peptide.; SIGNAL_PEPTIDE_C_REGION: C-terminal region of a signal peptide.	NA	Metabolism	signal peptide
Ec-00_004770	Hypothetical protein	n/a;n/a;n/a	Coil:	NA	Unknown	other localisation
Ec-00_004780	Hypothetical protein	n/a;n/a;n/a	NA	NA	Unknown	other localisation
Ec-00_004790	Hypothetical protein	n/a;n/a;n/a	CYTOPLASMIC_DOMAIN: Region of a membrane-bound protein predicted to be outside the membrane, in the cytoplasm.; NON_CYTOPLASMIC_DOMAIN: Region of a membrane-bound protein predicted to be outside the membrane, in the extracellular region; TMhelix: Region of a membrane-bound protein predicted to be embedded in the membrane.; TRANSMEMBRANE: Region of a membrane-bound protein predicted to be embedded…	NA	Unknown	signal anchor
Ec-00_004800	Hypothetical protein	n/a;n/a;n/a	NA	NA	Unknown	nd
Ec-00_004810	Glycosyltransferase AER61, uncharacterised	GO:0016757	IPR007657: Glycosyltransferase AER61, uncharacterised	NA	Metabolism	other localisation
Ec-00_004820	Hypothetical protein	n/a;n/a;n/a	NA	NA	Unknown	other localisation
Ec-00_004830	expressed unknown protein	n/a;n/a;n/a	NA	NA	Unknown	other localisation
Ec-00_004840	exonuclease I Exo1	GO:0004518;GO:0006281	TMhelix: Region of a membrane-bound protein predicted to be embedded in the membrane.	NA	DNA or chromatin modification	other localisation
Ec-00_004850	Ankyrin repeat-containing domain	n/a;GO:0005515	IPR020683: Ankyrin repeat-containing domain; PTHR24198: ; IPR002110: Ankyrin repeat	NA	Membrane function and transporters	other localisation
Ec-00_004860	Hypothetical protein	n/a;n/a;n/a	SIGNAL_PEPTIDE: Signal peptide region; IPR027417: P-loop containing nucleoside triphosphate hydrolase; SIGNAL_PEPTIDE_N_REGION: N-terminal region of a signal peptide.; SIGNAL_PEPTIDE_C_REGION: C-terminal region of a signal peptide.; NON_CYTOPLASMIC_DOMAIN: Region of a membrane-bound protein predicted to be outside the membrane, in the extracellular region; IPR000863: Sulfotransferase domain; Sign…	NA	Unknown	signal peptide
Ec-00_004870	hypothetical protein	n/a;n/a;n/a	NA	NA	Unknown	other localisation
Ec-00_004890	Winged helix-turn-helix DNA-binding domain	n/a;n/a;n/a	IPR011991: Winged helix-turn-helix DNA-binding domain; PF13551: Winged helix-turn helix	NA	Transcription	other localisation
Ec-00_004900	conserved unknown protein	n/a;n/a;n/a	NA	NA	Unknown	other localisation
Ec-00_004910	hypothetical protein	n/a;n/a;n/a	NA	NA	Unknown	other localisation
Ec-00_004920	PIN domain-like	GO:0004518;GO:0006281	TMhelix: Region of a membrane-bound protein predicted to be embedded in the membrane.; IPR029060: PIN domain-like	NA	RNA modification or binding	other localisation
Ec-00_004940	hypothetical protein	n/a;n/a;n/a	NA	NA	Unknown	other localisation
Ec-00_004950	expressed unknown protein	n/a;n/a;n/a	NA	NA	Unknown	other localisation
Ec-00_004960	Hypothetical protein	n/a;n/a;n/a	NA	NA	Unknown	other localisation
Ec-00_004970	hypothetical protein	n/a;n/a;n/a	Coil:	NA	Unknown	other localisation
Ec-00_004980	expressed unknown protein	n/a;n/a;n/a	NA	NA	Unknown	other localisation
Ec-00_005000	conserved unknown protein	n/a;n/a;n/a	NA	NA	Unknown	other localisation
Ec-00_005010	Hypothetical protein	n/a;n/a;n/a	NA	NA	Unknown	mitochondrion
Ec-00_005020	Hypothetical protein	n/a;n/a;n/a	NA	NA	Unknown	nd
Ec-00_005030	expressed unknown protein	n/a;n/a;n/a	G3DSA:2.170.270.10: ; Coil: ; SSF82199:	NA	Unknown	other localisation
Ec-00_005040	expressed unknown protein	n/a;n/a;n/a	NA	NA	Unknown	nd
Ec-00_005050	expressed unknown protein	n/a;n/a;n/a	NA	NA	Unknown	other localisation
Ec-00_005060	3'-5' exonuclease domain	GO:0006139;GO:0003676;GO:0008408	CYTOPLASMIC_DOMAIN: Region of a membrane-bound protein predicted to be outside the membrane, in the cytoplasm.; NON_CYTOPLASMIC_DOMAIN: Region of a membrane-bound protein predicted to be outside the membrane, in the extracellular region; PTHR13620: ; IPR012337: Ribonuclease H-like domain; IPR002562: 3'-5' exonuclease domain; TRANSMEMBRANE: Region of a membrane-bound protein predicted to be embedd…	NA	DNA or chromatin modification	other localisation
Ec-00_005090	conserved unknown protein	n/a;n/a;n/a	NA	NA	Unknown	other localisation
Ec-00_005120	expressed unknown protein	n/a;n/a;n/a	NA	NA	Unknown	other localisation
Ec-00_005130	PIN domain-like	GO:0004518;GO:0006281	IPR029060: PIN domain-like	NA	RNA modification or binding	other localisation
Ec-00_005140	Hypothetical protein	n/a;n/a;n/a	CYTOPLASMIC_DOMAIN: Region of a membrane-bound protein predicted to be outside the membrane, in the cytoplasm.; NON_CYTOPLASMIC_DOMAIN: Region of a membrane-bound protein predicted to be outside the membrane, in the extracellular region; TRANSMEMBRANE: Region of a membrane-bound protein predicted to be embedded in the membrane.	NA	Unknown	nd
Ec-00_005150	Ankyrin repeat-containing domain	n/a;GO:0005515	IPR020683: Ankyrin repeat-containing domain; PTHR24198: ; Coil: ; IPR002110: Ankyrin repeat	NA	Membrane function and transporters	other localisation
Ec-00_005160	Hypothetical protein	n/a;n/a;n/a	TMhelix: Region of a membrane-bound protein predicted to be embedded in the membrane.	NA	Unknown	nd
Ec-00_005180	Zinc finger, RING/FYVE/PHD-type	n/a;n/a;n/a	IPR017907: Zinc finger, RING-type, conserved site; SSF57850: ; IPR001841: Zinc finger, RING-type; IPR013083: Zinc finger, RING/FYVE/PHD-type; Coil:	NA	Cellular regulation and signalling	other localisation
Ec-00_005190	Hypothetical protein	n/a;n/a;n/a	CYTOPLASMIC_DOMAIN: Region of a membrane-bound protein predicted to be outside the membrane, in the cytoplasm.; NON_CYTOPLASMIC_DOMAIN: Region of a membrane-bound protein predicted to be outside the membrane, in the extracellular region; TMhelix: Region of a membrane-bound protein predicted to be embedded in the membrane.; TRANSMEMBRANE: Region of a membrane-bound protein predicted to be embedded…	NA	Unknown	other localisation
Ec-00_005200	Nck-associated protein 1	n/a;n/a;n/a	IPR019137: Nck-associated protein 1; PTHR12093:	NA	Cytoskeleton and flagella	other localisation
Ec-00_005210	Pentatricopeptide repeat	n/a;n/a;n/a	IPR002885: Pentatricopeptide repeat; PTHR24015:	NA	RNA modification or binding	other localisation
Ec-00_005220	Small GTPase superfamily, Ras type	GO:0016020;GO:0007165;GO:0006184;GO:0005622;GO:0007264;GO:0005525	IPR002041: Ran GTPase; IPR027417: P-loop containing nucleoside triphosphate hydrolase; IPR003578: Small GTPase superfamily, Rho type; IPR001806: Small GTPase superfamily; IPR005225: Small GTP-binding protein domain; IPR003579: Small GTPase superfamily, Rab type; IPR020849: Small GTPase superfamily, Ras type; PS51419: small GTPase Rab1 family profile.; PTHR24073:	NA	Cellular regulation and signalling	other localisation
Ec-00_005230	Nitroreductase	GO:0006118;GO:0016491	IPR000415: Nitroreductase-like; PTHR23026: ; IPR029479: Nitroreductase	NA	Metabolism	mitochondrion
Ec-00_005240	WD40 repeat	GO:0005515	IPR019775: WD40 repeat, conserved site; IPR001680: WD40 repeat; PTHR14344:SF3: ; IPR017986: WD40-repeat-containing domain; IPR015943: WD40/YVTN repeat-like-containing domain; Coil: ; PTHR14344: ; IPR011047: Quinoprotein alcohol dehydrogenase-like superfamily	NA	Protein binding or modification	other localisation
Ec-00_005250	Hypothetical protein	n/a;n/a;n/a	SIGNAL_PEPTIDE: Signal peptide region; IPR014756: Immunoglobulin E-set; SIGNAL_PEPTIDE_N_REGION: N-terminal region of a signal peptide.; IPR017868: Filamin/ABP280 repeat-like; SignalP-TM: ; SIGNAL_PEPTIDE_C_REGION: C-terminal region of a signal peptide.; NON_CYTOPLASMIC_DOMAIN: Region of a membrane-bound protein predicted to be outside the membrane, in the extracellular region; IPR013783: Immunog…	NA	Unknown	signal peptide
Ec-00_005260	expressed unknown protein	n/a;n/a;n/a	NA	NA	Unknown	other localisation
Ec-00_005270	hypothetical protein	n/a;n/a;n/a	CYTOPLASMIC_DOMAIN: Region of a membrane-bound protein predicted to be outside the membrane, in the cytoplasm.; NON_CYTOPLASMIC_DOMAIN: Region of a membrane-bound protein predicted to be outside the membrane, in the extracellular region; TMhelix: Region of a membrane-bound protein predicted to be embedded in the membrane.; TRANSMEMBRANE: Region of a membrane-bound protein predicted to be embedded…	NA	Unknown	other localisation
Ec-00_005280	expressed unknown protein	n/a;n/a;n/a	Coil:	NA	Unknown	other localisation
Ec-00_005290	Hypothetical protein	n/a;n/a;n/a	NA	NA	Unknown	nd
Ec-00_005310	Hypothetical protein	n/a;n/a;n/a	PTHR13132: ; IPR027350: Glycosyltransferase family 23 (GT23) domain	NA	Unknown	other localisation
Ec-00_005320	hypothetical protein	n/a;n/a;n/a	NA	NA	Unknown	other localisation
Ec-00_005330	hypothetical protein	n/a;n/a;n/a	NON_CYTOPLASMIC_DOMAIN: Region of a membrane-bound protein predicted to be outside the membrane, in the extracellular region; SIGNAL_PEPTIDE: Signal peptide region; SIGNAL_PEPTIDE_N_REGION: N-terminal region of a signal peptide.; SIGNAL_PEPTIDE_H_REGION: Hydrophobic region of a signal peptide.; SignalP-TM: ; SIGNAL_PEPTIDE_C_REGION: C-terminal region of a signal peptide.	NA	Unknown	nd
Ec-00_005370	conserved unknown protein	n/a;n/a;n/a	NA	NA	Unknown	other localisation
Ec-00_005380	hypothetical protein	n/a;n/a;n/a	Coil:	NA	Unknown	other localisation
Ec-00_005390	Notch domain	GO:0016020;GO:0030154	CYTOPLASMIC_DOMAIN: Region of a membrane-bound protein predicted to be outside the membrane, in the cytoplasm.; NON_CYTOPLASMIC_DOMAIN: Region of a membrane-bound protein predicted to be outside the membrane, in the extracellular region; TMhelix: Region of a membrane-bound protein predicted to be embedded in the membrane.; IPR000800: Notch domain; TRANSMEMBRANE: Region of a membrane-bound protein…	NA	Cellular regulation and signalling	other localisation
Ec-00_005400	expressed unknown protein	n/a;n/a;n/a	PTHR11439: ; Coil:	NA	Unknown	other localisation
Ec-00_005410	Aryl sulfotransferase	GO:0008146	PTHR11783: ; IPR000863: Sulfotransferase domain; PTHR11783:SF15: ; IPR027417: P-loop containing nucleoside triphosphate hydrolase	KOG1584	Metabolism	mitochondrion
Ec-00_005420	Histone H4	GO:0003677;GO:0005634;GO:0000786	NA	NA	DNA or chromatin modification	other localisation
Ec-00_005430	Histone H1	GO:0003677;GO:0005634;GO:0006334;GO:0000786	NA	NA	DNA or chromatin modification	other localisation
Ec-00_005440	Histone H3	GO:0003677;GO:0000786	NA	NA	DNA or chromatin modification	other localisation
Ec-00_005450	Dolichyl pyrophosphate Man9GlcNAc2 alpha-1,3-glucosyltransferase, family GT57	GO:0016758;GO:0005789	CYTOPLASMIC_DOMAIN: Region of a membrane-bound protein predicted to be outside the membrane, in the cytoplasm.; NON_CYTOPLASMIC_DOMAIN: Region of a membrane-bound protein predicted to be outside the membrane, in the extracellular region; TMhelix: Region of a membrane-bound protein predicted to be embedded in the membrane.; IPR004856: Glycosyl transferase, ALG6/ALG8; TRANSMEMBRANE: Region of a mem…	KOG2575	Metabolism	signal peptide
Ec-00_005460	Histone H2B	GO:0003677	NA	NA	DNA or chromatin modification	other localisation
Ec-00_005470	Histone H2A	GO:0003677;GO:0005634;GO:0000786	NA	NA	DNA or chromatin modification	other localisation
Ec-00_005480	expressed unknown protein	n/a;n/a;n/a	NA	NA	Unknown	nd
Ec-00_005490	expressed unknown protein	n/a;n/a;n/a	NA	NA	Unknown	other localisation
Ec-00_005500	hypothetical protein	n/a;n/a;n/a	NA	NA	Unknown	nd
Ec-00_005510	Exostosin-like	GO:0016020	IPR004263: Exostosin-like; PTHR11062:	NA	Metabolism	other localisation
Ec-00_005520	expressed unknown protein	n/a;n/a;n/a	CYTOPLASMIC_DOMAIN: Region of a membrane-bound protein predicted to be outside the membrane, in the cytoplasm.; NON_CYTOPLASMIC_DOMAIN: Region of a membrane-bound protein predicted to be outside the membrane, in the extracellular region; TMhelix: Region of a membrane-bound protein predicted to be embedded in the membrane.; TRANSMEMBRANE: Region of a membrane-bound protein predicted to be embedded…	NA	Unknown	other localisation
Ec-00_005530	expressed unknown protein	n/a;n/a;n/a	NA	NA	Unknown	other localisation
Ec-00_005540	Dynein regulator LIS1	n/a;n/a;n/a	IPR017252: Dynein regulator LIS1; SSF109925: ; IPR019775: WD40 repeat, conserved site; TMhelix: Region of a membrane-bound protein predicted to be embedded in the membrane.; IPR001680: WD40 repeat; IPR020472: G-protein beta WD-40 repeat; CYTOPLASMIC_DOMAIN: Region of a membrane-bound protein predicted to be outside the membrane, in the cytoplasm.; NON_CYTOPLASMIC_DOMAIN: Region of a membrane-boun…	NA	Cytoskeleton and flagella	other localisation
Ec-00_005550	High mobility group domain protein	GO:0003677;GO:0005634;GO:0005515;GO:0006355	PTHR13711: ; IPR009071: High mobility group box domain; Coil:	NA	DNA or chromatin modification	other localisation
Ec-00_005560	ISC system FeS cluster assembly, IscU scaffold	GO:0005506;GO:0051536;GO:0016226	SSF82649: ; IPR002871: NIF system FeS cluster assembly, NifU, N-terminal; PTHR10093: ; IPR011339: ISC system FeS cluster assembly, IscU scaffold; G3DSA:3.90.1010.10:	NA	Metabolism	other localisation
Ec-00_005570	Light harvesting complex protein (probable pseudogene)	GO:0016020;GO:0009765	NA	NA	Photosynthesis	signal peptide
Ec-00_005580	Nug1, nuclear ribosome-associated GTPase	GO:0005525	PTHR11089: ; IPR006073: GTP binding domain; IPR027417: P-loop containing nucleoside triphosphate hydrolase; IPR023179: GTP-binding protein, orthogonal bundle domain; IPR030378: Circularly permuted (CP)-type guanine nucleotide-binding (G) domain; IPR014813: Guanine nucleotide-binding protein-like 3, N-terminal domain	NA	RNA modification or binding	other localisation
Ec-00_005590	Ankyrin repeat-containing domain	n/a;n/a;n/a	IPR020683: Ankyrin repeat-containing domain; PTHR24123: ; IPR002110: Ankyrin repeat	NA	Membrane function and transporters	other localisation
Ec-00_005610	expressed unknown protein	n/a;n/a;n/a	NA	NA	Unknown	other localisation
Ec-00_005620	hypothetical protein	n/a;n/a;n/a	IPR011989: Armadillo-like helical	NA	Unknown	other localisation
Ec-00_005630	RGS domain	GO:0038032	CYTOPLASMIC_DOMAIN: Region of a membrane-bound protein predicted to be outside the membrane, in the cytoplasm.; NON_CYTOPLASMIC_DOMAIN: Region of a membrane-bound protein predicted to be outside the membrane, in the extracellular region; G3DSA:1.10.167.10: ; IPR016137: RGS domain; TMhelix: Region of a membrane-bound protein predicted to be embedded in the membrane.; TRANSMEMBRANE: Region of a mem…	NA	Cellular regulation and signalling	other localisation
Ec-00_005640	conserved unknown protein	n/a;n/a;n/a	NA	NA	Unknown	other localisation
Ec-00_005650	expressed unknown protein	n/a;n/a;n/a	NA	NA	Unknown	other localisation
Ec-00_005660	hypothetical protein	n/a;n/a;n/a	NA	NA	Unknown	other localisation
Ec-00_005670	C2H2 zinc finger protein	GO:0046872;GO:0003676	NA	NA	Transcription	other localisation
Ec-00_005680	EsV-1-12	n/a;n/a;n/a	PTHR11319:SF29: ; TMhelix: Region of a membrane-bound protein predicted to be embedded in the membrane.; IPR003368: Polymorphic outer membrane protein repeat; IPR012334: Pectin lyase fold; CYTOPLASMIC_DOMAIN: Region of a membrane-bound protein predicted to be outside the membrane, in the cytoplasm.; IPR011050: Pectin lyase fold/virulence factor; NON_CYTOPLASMIC_DOMAIN: Region of a membrane-bound …	NA	Transposon or viral gene	other localisation
Ec-00_005690	EsV-1-21	n/a;GO:0005515	IPR020683: Ankyrin repeat-containing domain; PTHR24198: ; IPR002110: Ankyrin repeat	NA	Transposon or viral gene	other localisation
Ec-00_005700	hypothetical protein	n/a;n/a;n/a	NA	NA	Unknown	other localisation
Ec-00_005710	Hypothetical protein	n/a;n/a;n/a	NON_CYTOPLASMIC_DOMAIN: Region of a membrane-bound protein predicted to be outside the membrane, in the extracellular region; SIGNAL_PEPTIDE: Signal peptide region; SIGNAL_PEPTIDE_N_REGION: N-terminal region of a signal peptide.; SIGNAL_PEPTIDE_H_REGION: Hydrophobic region of a signal peptide.; SIGNAL_PEPTIDE_C_REGION: C-terminal region of a signal peptide.	NA	Unknown	nd
Ec-00_005720	Hypothetical protein	n/a;n/a;n/a	NA	NA	Unknown	other localisation
Ec-00_005730	Hypothetical protein	n/a;n/a;n/a	NON_CYTOPLASMIC_DOMAIN: Region of a membrane-bound protein predicted to be outside the membrane, in the extracellular region; SIGNAL_PEPTIDE: Signal peptide region; SIGNAL_PEPTIDE_N_REGION: N-terminal region of a signal peptide.; SIGNAL_PEPTIDE_H_REGION: Hydrophobic region of a signal peptide.; SIGNAL_PEPTIDE_C_REGION: C-terminal region of a signal peptide.	NA	Unknown	nd
Ec-00_005740	Hypothetical protein	n/a;n/a;n/a	NA	NA	Unknown	other localisation
Ec-00_005750	Hypothetical protein	n/a;n/a;n/a	NON_CYTOPLASMIC_DOMAIN: Region of a membrane-bound protein predicted to be outside the membrane, in the extracellular region; SignalP-noTM: ; SIGNAL_PEPTIDE: Signal peptide region; SIGNAL_PEPTIDE_N_REGION: N-terminal region of a signal peptide.; SIGNAL_PEPTIDE_H_REGION: Hydrophobic region of a signal peptide.; SIGNAL_PEPTIDE_C_REGION: C-terminal region of a signal peptide.	NA	Unknown	signal peptide
Ec-00_005760	Armadillo-type fold	GO:0005488	IPR011989: Armadillo-like helical; IPR016024: Armadillo-type fold	NA	Cellular regulation and signalling	other localisation
Ec-00_005770	Pectin lyase fold/virulence factor	n/a;n/a;n/a	TMhelix: Region of a membrane-bound protein predicted to be embedded in the membrane.; SIGNAL_PEPTIDE: Signal peptide region; IPR003368: Polymorphic outer membrane protein repeat; SIGNAL_PEPTIDE_N_REGION: N-terminal region of a signal peptide.; SignalP-TM: ; SIGNAL_PEPTIDE_C_REGION: C-terminal region of a signal peptide.; NON_CYTOPLASMIC_DOMAIN: Region of a membrane-bound protein predicted to be …	NA	Cell wall and extracellular	signal peptide
Ec-00_005780	ribosome recycling factor	GO:0006412	G3DSA:1.10.132.20: ; SIGNAL_PEPTIDE: Signal peptide region; TMhelix: Region of a membrane-bound protein predicted to be embedded in the membrane.; SIGNAL_PEPTIDE_N_REGION: N-terminal region of a signal peptide.; IPR002661: Ribosome recycling factor; SIGNAL_PEPTIDE_C_REGION: C-terminal region of a signal peptide.; SignalP-TM: ; NON_CYTOPLASMIC_DOMAIN: Region of a membrane-bound protein predicted t…	KOG4759	Protein synthesis	signal peptide
Ec-00_005790	Zinc finger, RING/FYVE/PHD-type	GO:0005515;GO:0006281;GO:0006310;GO:0008270	SSF57850: ; IPR013083: Zinc finger, RING/FYVE/PHD-type; PF13920: Zinc finger, C3HC4 type (RING finger); PTHR10360:	NA	Cellular regulation and signalling	other localisation
Ec-00_005800	S-adenosyl-L-methionine-dependent methyltransferase	n/a;n/a;n/a	PF13489: Methyltransferase domain; IPR026113: Methyltransferase-like; IPR029063: S-adenosyl-L-methionine-dependent methyltransferase	NA	Metabolism	other localisation
Ec-00_005810	conserved unknown protein	n/a;n/a;n/a	NA	NA	Unknown	other localisation
Ec-00_005820	cytochrome P450	GO:0020037;GO:0005506;GO:0055114;GO:0016705	IPR001128: Cytochrome P450; SIGNAL_PEPTIDE: Signal peptide region; TMhelix: Region of a membrane-bound protein predicted to be embedded in the membrane.; SIGNAL_PEPTIDE_N_REGION: N-terminal region of a signal peptide.; IPR017972: Cytochrome P450, conserved site; SIGNAL_PEPTIDE_C_REGION: C-terminal region of a signal peptide.; SignalP-TM: ; NON_CYTOPLASMIC_DOMAIN: Region of a membrane-bound protei…	KOG0157	Metabolism	signal peptide
Ec-00_005830	Notch domain	GO:0016020;GO:0030154	SIGNAL_PEPTIDE: Signal peptide region; SIGNAL_PEPTIDE_N_REGION: N-terminal region of a signal peptide.; IPR000800: Notch domain; SIGNAL_PEPTIDE_C_REGION: C-terminal region of a signal peptide.; SignalP-TM: ; NON_CYTOPLASMIC_DOMAIN: Region of a membrane-bound protein predicted to be outside the membrane, in the extracellular region; SignalP-noTM: ; SIGNAL_PEPTIDE_H_REGION: Hydrophobic region of a …	NA	Cellular regulation and signalling	signal peptide
Ec-00_005840	Hypothetical protein	n/a;n/a;n/a	NA	NA	Unknown	other localisation
Ec-00_005850	cytochrome P450	GO:0005506;GO:0016705;GO:0020037;GO:0055114	IPR001128: Cytochrome P450; SIGNAL_PEPTIDE: Signal peptide region; SIGNAL_PEPTIDE_N_REGION: N-terminal region of a signal peptide.; IPR017972: Cytochrome P450, conserved site; IPR002401: Cytochrome P450, E-class, group I; SignalP-TM: ; SIGNAL_PEPTIDE_C_REGION: C-terminal region of a signal peptide.; NON_CYTOPLASMIC_DOMAIN: Region of a membrane-bound protein predicted to be outside the membrane, i…	KOG0157	Metabolism	signal peptide
Ec-00_005860	Harbinger transposase-derived nuclease domain	n/a;n/a;n/a	PTHR22930: ; IPR027806: Harbinger transposase-derived nuclease domain	NA	Transposon or viral gene	other localisation
Ec-00_005870	Hypothetical protein	n/a;n/a;n/a	NA	NA	Unknown	other localisation
Ec-00_005880	hypothetical protein	n/a;n/a;n/a	NON_CYTOPLASMIC_DOMAIN: Region of a membrane-bound protein predicted to be outside the membrane, in the extracellular region; SIGNAL_PEPTIDE: Signal peptide region; SignalP-noTM: ; SIGNAL_PEPTIDE_N_REGION: N-terminal region of a signal peptide.; SIGNAL_PEPTIDE_H_REGION: Hydrophobic region of a signal peptide.; SIGNAL_PEPTIDE_C_REGION: C-terminal region of a signal peptide.	NA	Unknown	nd
Ec-00_005890	conserved unknown protein	n/a;n/a;n/a	Coil:	NA	Unknown	other localisation
Ec-00_005900	WD40 repeat	GO:0005515	IPR019775: WD40 repeat, conserved site; SIGNAL_PEPTIDE: Signal peptide region; TMhelix: Region of a membrane-bound protein predicted to be embedded in the membrane.; IPR001680: WD40 repeat; SIGNAL_PEPTIDE_N_REGION: N-terminal region of a signal peptide.; SIGNAL_PEPTIDE_C_REGION: C-terminal region of a signal peptide.; SignalP-TM: ; NON_CYTOPLASMIC_DOMAIN: Region of a membrane-bound protein predic…	NA	Protein binding or modification	signal peptide
Ec-00_005910	Predicted: Tubulin-tyrosine ligase-related protein	GO:0004835;GO:0006464	IPR027749: Tubulin--tyrosine ligase-like protein 12; IPR004344: Tubulin-tyrosine ligase/Tubulin polyglutamylase; PTHR12241:	KOG2155	Cytoskeleton and flagella	other localisation
Ec-00_005920	Glucose-methanol-choline oxidoreductase	GO:0016614;GO:0050660;GO:0006066;GO:0055114;GO:0008812	IPR000172: Glucose-methanol-choline oxidoreductase, N-terminal; TMhelix: Region of a membrane-bound protein predicted to be embedded in the membrane.; IPR007867: Glucose-methanol-choline oxidoreductase, C-terminal; PTHR11552: ; SSF54373: ; CYTOPLASMIC_DOMAIN: Region of a membrane-bound protein predicted to be outside the membrane, in the cytoplasm.; NON_CYTOPLASMIC_DOMAIN: Region of a membrane-bo…	NA	Metabolism	other localisation
Ec-00_005930	Chalcone Isomerase-like	GO:0016872	CYTOPLASMIC_DOMAIN: Region of a membrane-bound protein predicted to be outside the membrane, in the cytoplasm.; NON_CYTOPLASMIC_DOMAIN: Region of a membrane-bound protein predicted to be outside the membrane, in the extracellular region; TMhelix: Region of a membrane-bound protein predicted to be embedded in the membrane.; IPR016087: Chalcone isomerase; TRANSMEMBRANE: Region of a membrane-bound p…	NA	Metabolism	signal peptide
Ec-00_005940	conserved unknown protein	n/a;n/a;n/a	CYTOPLASMIC_DOMAIN: Region of a membrane-bound protein predicted to be outside the membrane, in the cytoplasm.; NON_CYTOPLASMIC_DOMAIN: Region of a membrane-bound protein predicted to be outside the membrane, in the extracellular region; TMhelix: Region of a membrane-bound protein predicted to be embedded in the membrane.; TRANSMEMBRANE: Region of a membrane-bound protein predicted to be embedded…	NA	Unknown	other localisation
Ec-00_005950	Serine/threonine/dual specificity protein kinase, catalytic domain	GO:0004672;GO:0005524;GO:0006468	IPR002290: Serine/threonine/dual specificity protein kinase, catalytic domain; SIGNAL_PEPTIDE_N_REGION: N-terminal region of a signal peptide.; IPR002372: Pyrrolo-quinoline quinone repeat; SignalP-TM: ; IPR011009: Protein kinase-like domain; IPR008271: Serine/threonine-protein kinase, active site; NON_CYTOPLASMIC_DOMAIN: Region of a membrane-bound protein predicted to be outside the membrane, in …	NA	Cellular regulation and signalling	signal peptide
Ec-00_005960	conserved unknown protein	n/a;n/a;n/a	Coil:	NA	Unknown	other localisation
Ec-00_005970	expressed unknown protein	n/a;n/a;n/a	SIGNAL_PEPTIDE: Signal peptide region; mobidb-lite: consensus disorder prediction; SIGNAL_PEPTIDE_N_REGION: N-terminal region of a signal peptide.; SignalP-TM: ; SIGNAL_PEPTIDE_C_REGION: C-terminal region of a signal peptide.; CYTOPLASMIC_DOMAIN: Region of a membrane-bound protein predicted to be outside the membrane, in the cytoplasm.; NON_CYTOPLASMIC_DOMAIN: Region of a membrane-bound protein p…	NA	Unknown	other localisation
Ec-00_005980	hypothetical protein	n/a;n/a;n/a	Coil:	NA	Unknown	other localisation
Ec-00_005990	conserved unknown protein	n/a;n/a;n/a	NA	NA	Unknown	other localisation
Ec-00_006000	expressed unknown protein	n/a;n/a;n/a	Coil: ; SignalP-TM:	NA	Unknown	other localisation
Ec-00_006010	hypothetical protein	n/a;n/a;n/a	NA	NA	Unknown	other localisation
Ec-00_006020	EsV-1-8	n/a;n/a;n/a	NA	NA	Transposon or viral gene	other localisation
Ec-00_006030	Hypothetical protein	n/a;n/a;n/a	NA	NA	Unknown	other localisation
Ec-00_006040	Vesicle coat complex COPI, beta sub-unit	GO:0005198;GO:0005515;GO:0006886;GO:0016192;GO:0030117	PTHR19876: ; IPR006692: Coatomer, WD associated region; TMhelix: Region of a membrane-bound protein predicted to be embedded in the membrane.; IPR017986: WD40-repeat-containing domain; IPR015943: WD40/YVTN repeat-like-containing domain; IPR001680: WD40 repeat; IPR020472: G-protein beta WD-40 repeat	KOG0276	Vesicle trafficking and secretion	other localisation
Ec-00_006060	expressed unknown protein	n/a;n/a;n/a	NA	NA	Unknown	other localisation
Ec-00_006070	Ankyrin repeat-containing domain	n/a;GO:0005515	IPR020683: Ankyrin repeat-containing domain; IPR002110: Ankyrin repeat; PTHR24188:	NA	Membrane function and transporters	other localisation
Ec-00_006080	Ankyrin repeat	GO:0005515	IPR020683: Ankyrin repeat-containing domain; PF13637: Ankyrin repeats (many copies); Coil: ; IPR002110: Ankyrin repeat; PTHR24123:	NA	Membrane function and transporters	other localisation
Ec-00_006090	Ankyrin repeat-containing domain	n/a;GO:0005515	IPR020683: Ankyrin repeat-containing domain; PTHR24198: ; IPR002110: Ankyrin repeat	NA	Membrane function and transporters	other localisation
Ec-00_006100	EsV-1-199	n/a;GO:0005515	IPR020683: Ankyrin repeat-containing domain; PTHR24198: ; IPR002110: Ankyrin repeat	NA	Membrane function and transporters	other localisation
Ec-00_006110	Hypothetical protein	n/a;n/a;n/a	NA	NA	Unknown	other localisation
Ec-00_006120	FirrV-1-A34	NA	NA	NA	Transposon or viral gene	other localisation
Ec-00_006130	EsV-1-159	n/a;n/a;n/a	IPR008979: Galactose-binding domain-like	NA	Transposon or viral gene	other localisation
Ec-00_006140	EsV-1-207	NA	NA	NA	Transposon or viral gene	other localisation
Ec-00_006170	EsV-1-13	n/a;n/a;n/a	Coil:	NA	Transposon or viral gene	other localisation
Ec-00_006180	histidine kinase-like protein	GO:0016310;GO:0016772	PTHR24423: ; IPR005467: Signal transduction histidine kinase, core; SIGNAL_PEPTIDE: Signal peptide region; SIGNAL_PEPTIDE_N_REGION: N-terminal region of a signal peptide.; IPR003594: Histidine kinase-like ATPase, C-terminal domain; SIGNAL_PEPTIDE_C_REGION: C-terminal region of a signal peptide.; IPR011006: CheY-like superfamily; NON_CYTOPLASMIC_DOMAIN: Region of a membrane-bound protein predicted…	NA	Cellular regulation and signalling	signal peptide
Ec-00_006190	P-loop containing nucleoside triphosphate hydrolase	GO:0003677;GO:0006260;n/a	PTHR11669: ; G3DSA:1.20.272.10: ; IPR013748: Replication factor C, C-terminal domain; IPR008921: DNA polymerase III, clamp loader complex, gamma/delta/delta subunit, C-terminal; IPR027417: P-loop containing nucleoside triphosphate hydrolase	NA	Metabolism	other localisation
Ec-00_006200	EsV-1-50	n/a;GO:0005515	IPR013783: Immunoglobulin-like fold; IPR003961: Fibronectin type III	NA	Transposon or viral gene	other localisation
Ec-00_006240	Strawberry notch, helicase C domain	n/a;n/a;n/a	IPR026741: Protein strawberry notch; IPR026937: Strawberry notch, helicase C domain	NA	RNA modification or binding	other localisation
Ec-00_006260	Strawberry notch, helicase C domain	n/a;n/a;n/a	IPR026741: Protein strawberry notch; IPR026937: Strawberry notch, helicase C domain; IPR027417: P-loop containing nucleoside triphosphate hydrolase	NA	RNA modification or binding	mitochondrion
Ec-00_006270	Light harvesting complex protein; possible pseudogene	GO:0009765;GO:0016020	NA	NA	Photosynthesis	other localisation
Ec-00_006280	Light harvesting complex protein	GO:0009765;GO:0016020	IPR022796: Chlorophyll A-B binding protein; IPR001344: Chlorophyll A-B binding protein, plant; IPR023329: Chlorophyll a/b binding protein domain	NA	Photosynthesis	other localisation
Ec-00_006290	Light harvesting complex protein	GO:0009765;GO:0016020	NON_CYTOPLASMIC_DOMAIN: Region of a membrane-bound protein predicted to be outside the membrane, in the extracellular region; SIGNAL_PEPTIDE: Signal peptide region; SIGNAL_PEPTIDE_N_REGION: N-terminal region of a signal peptide.; SIGNAL_PEPTIDE_H_REGION: Hydrophobic region of a signal peptide.; SIGNAL_PEPTIDE_C_REGION: C-terminal region of a signal peptide.; SignalP-TM:	NA	Photosynthesis	nd
Ec-00_006310	Light harvesting complex protein	GO:0009765;GO:0016020	NA	NA	Photosynthesis	nd
Ec-00_006320	DNA polymerase mu	GO:0003677;GO:0003887;GO:0006260	SSF81585: ; IPR029398: DNA polymerase beta, thumb domain; IPR010996: DNA polymerase beta-like, N-terminal domain; SSF81301: ; IPR018944: DNA polymerase lambda, fingers domain; IPR027421: DNA polymerase family X lyase domain; PTHR11276: ; G3DSA:1.10.150.20: ; G3DSA:3.30.460.10: ; IPR028207: DNA polymerase beta, palm domain; IPR002054: DNA-directed DNA polymerase X; IPR022312: DNA polymerase family…	NA	DNA or chromatin modification	other localisation
Ec-00_006340	ferric reductase	GO:0005506;GO:0009055;GO:0016021;GO:0016491;GO:0050660	TMhelix: Region of a membrane-bound protein predicted to be embedded in the membrane.; IPR013130: Ferric reductase transmembrane component-like domain; SSF52343: ; PTHR11972: ; CYTOPLASMIC_DOMAIN: Region of a membrane-bound protein predicted to be outside the membrane, in the cytoplasm.; NON_CYTOPLASMIC_DOMAIN: Region of a membrane-bound protein predicted to be outside the membrane, in the extrac…	NA	Metabolism	signal peptide
Ec-00_006350	Light harvesting complex protein	GO:0009765;GO:0016020	SIGNAL_PEPTIDE: Signal peptide region; IPR022796: Chlorophyll A-B binding protein; SIGNAL_PEPTIDE_N_REGION: N-terminal region of a signal peptide.; IPR023329: Chlorophyll a/b binding protein domain; SIGNAL_PEPTIDE_C_REGION: C-terminal region of a signal peptide.; SignalP-TM: ; NON_CYTOPLASMIC_DOMAIN: Region of a membrane-bound protein predicted to be outside the membrane, in the extracellular reg…	NA	Photosynthesis	chloroplast
Ec-00_006360	expressed unknown protein	n/a;n/a;n/a	CYTOPLASMIC_DOMAIN: Region of a membrane-bound protein predicted to be outside the membrane, in the cytoplasm.; NON_CYTOPLASMIC_DOMAIN: Region of a membrane-bound protein predicted to be outside the membrane, in the extracellular region; TMhelix: Region of a membrane-bound protein predicted to be embedded in the membrane.; TRANSMEMBRANE: Region of a membrane-bound protein predicted to be embedded…	NA	Unknown	nd
Ec-00_006370	Mannuronan C-5-epimerase	n/a;n/a;n/a	PTHR22990: ; PF13229: Right handed beta helix region; SIGNAL_PEPTIDE: Signal peptide region; SIGNAL_PEPTIDE_N_REGION: N-terminal region of a signal peptide.; IPR012334: Pectin lyase fold; SignalP-TM: ; SIGNAL_PEPTIDE_C_REGION: C-terminal region of a signal peptide.; IPR022441: Parallel beta-helix repeat-2; IPR011050: Pectin lyase fold/virulence factor; NON_CYTOPLASMIC_DOMAIN: Region of a membrane…	NA	Cell wall and extracellular	signal peptide
Ec-00_006380	Mannuronan C-5-epimerase	n/a;n/a;n/a	PTHR22990: ; PF13229: Right handed beta helix region; SIGNAL_PEPTIDE: Signal peptide region; SIGNAL_PEPTIDE_N_REGION: N-terminal region of a signal peptide.; IPR012334: Pectin lyase fold; SignalP-TM: ; SIGNAL_PEPTIDE_C_REGION: C-terminal region of a signal peptide.; IPR022441: Parallel beta-helix repeat-2; IPR011050: Pectin lyase fold/virulence factor; NON_CYTOPLASMIC_DOMAIN: Region of a membrane…	NA	Cell wall and extracellular	signal peptide
Ec-00_006390	hypothetical protein	n/a;n/a;n/a	SIGNAL_PEPTIDE: Signal peptide region; SignalP-TM: ; SIGNAL_PEPTIDE_C_REGION: C-terminal region of a signal peptide.; CYTOPLASMIC_DOMAIN: Region of a membrane-bound protein predicted to be outside the membrane, in the cytoplasm.; NON_CYTOPLASMIC_DOMAIN: Region of a membrane-bound protein predicted to be outside the membrane, in the extracellular region; SignalP-noTM: ; SIGNAL_PEPTIDE_H_REGION: Hy…	NA	Unknown	chloroplast
Ec-00_006400	Hypothetical protein	n/a;n/a;n/a	NON_CYTOPLASMIC_DOMAIN: Region of a membrane-bound protein predicted to be outside the membrane, in the extracellular region; SIGNAL_PEPTIDE: Signal peptide region; SIGNAL_PEPTIDE_N_REGION: N-terminal region of a signal peptide.; SIGNAL_PEPTIDE_H_REGION: Hydrophobic region of a signal peptide.; SIGNAL_PEPTIDE_C_REGION: C-terminal region of a signal peptide.	NA	Unknown	other localisation
Ec-00_006420	putative kinase wee 1	GO:0006468;GO:0004672;GO:0016772	IPR017441: Protein kinase, ATP binding site; IPR002290: Serine/threonine/dual specificity protein kinase, catalytic domain; G3DSA:3.30.200.20: ; IPR008271: Serine/threonine-protein kinase, active site; IPR011009: Protein kinase-like domain; IPR000719: Protein kinase domain; PTHR11042: ; G3DSA:1.10.510.10: ; Coil:	KOG0601	Cell cycle	other localisation
Ec-00_006430	expressed unknown protein	n/a;n/a;n/a	NA	NA	Unknown	other localisation
Ec-00_006440	hypothetical protein	n/a;n/a;n/a	NON_CYTOPLASMIC_DOMAIN: Region of a membrane-bound protein predicted to be outside the membrane, in the extracellular region; SIGNAL_PEPTIDE: Signal peptide region; SIGNAL_PEPTIDE_N_REGION: N-terminal region of a signal peptide.; SIGNAL_PEPTIDE_H_REGION: Hydrophobic region of a signal peptide.; SIGNAL_PEPTIDE_C_REGION: C-terminal region of a signal peptide.	NA	Unknown	other localisation
Ec-00_006450	hypothetical protein	n/a;n/a;n/a	PS51257: Prokaryotic membrane lipoprotein lipid attachment site profile.; SIGNAL_PEPTIDE: Signal peptide region; SIGNAL_PEPTIDE_N_REGION: N-terminal region of a signal peptide.; SignalP-TM: ; SIGNAL_PEPTIDE_C_REGION: C-terminal region of a signal peptide.; NON_CYTOPLASMIC_DOMAIN: Region of a membrane-bound protein predicted to be outside the membrane, in the extracellular region; SignalP-noTM: ; …	NA	Unknown	signal peptide
Ec-00_006460	expressed unknown protein	NA	NA	NA	Unknown	other localisation
Ec-00_006470	Rad21/Rec8-like protein, C-terminal, eukaryotic	GO:0000228;GO:0005515	IPR006909: Rad21/Rec8-like protein, C-terminal, eukaryotic; SSF46785: ; IPR023093: Rad21/Rec8-like protein, C-terminal; PTHR12585: ; IPR006910: Rad21/Rec8-like protein, N-terminal	NA	Cell cycle	other localisation
Ec-00_006480	Hypothetical protein	n/a;n/a;n/a	G3DSA:3.80.10.10: ; SSF52058:	NA	Unknown	other localisation
Ec-00_006490	Hypothetical protein	n/a;n/a;n/a	NA	NA	Unknown	nd
Ec-00_006500	expressed unknown protein	n/a;n/a;n/a	NA	NA	Unknown	other localisation
Ec-00_006510	expressed unknown protein	n/a;n/a;n/a	NA	NA	Unknown	other localisation
Ec-00_006520	expressed unknown protein	n/a;n/a;n/a	CYTOPLASMIC_DOMAIN: Region of a membrane-bound protein predicted to be outside the membrane, in the cytoplasm.; NON_CYTOPLASMIC_DOMAIN: Region of a membrane-bound protein predicted to be outside the membrane, in the extracellular region; Coil: ; TRANSMEMBRANE: Region of a membrane-bound protein predicted to be embedded in the membrane.	NA	Unknown	other localisation
Ec-00_006530	PDZ domain	GO:0005515	IPR009003: Trypsin-like cysteine/serine peptidase domain; IPR001940: Peptidase S1C; PF13365: Trypsin-like peptidase domain; PTHR22939: ; IPR001478: PDZ domain; G3DSA:2.40.10.10:	NA	Membrane function and transporters	other localisation
Ec-00_006540	Transcription initiation Spt4	GO:0005634;GO:0006355;GO:0008270;GO:0032786	IPR022800: Spt4/RpoE2 zinc finger; IPR016046: Transcription initiation Spt4-like; IPR029040: RNA polymerase subunit RPABC4/transcription elongation factor Spt4	NA	Transcription	other localisation
Ec-00_006550	conserved unknown protein	GO:0008270	IPR002893: Zinc finger, MYND-type; SSF144232:	NA	Unknown	other localisation
Ec-00_006560	conserved unknown protein	n/a;n/a;n/a	NON_CYTOPLASMIC_DOMAIN: Region of a membrane-bound protein predicted to be outside the membrane, in the extracellular region; G3DSA:3.40.140.10: ; SIGNAL_PEPTIDE: Signal peptide region; TMhelix: Region of a membrane-bound protein predicted to be embedded in the membrane.; PF14421: A distinct subfamily of CDD/CDA-like deaminases; SIGNAL_PEPTIDE_N_REGION: N-terminal region of a signal peptide.; SIG…	NA	Unknown	signal peptide
Ec-00_006570	imm upregulated 4	NA	NON_CYTOPLASMIC_DOMAIN: Region of a membrane-bound protein predicted to be outside the membrane, in the extracellular region; SignalP-noTM: ; SIGNAL_PEPTIDE: Signal peptide region; SIGNAL_PEPTIDE_N_REGION: N-terminal region of a signal peptide.; SIGNAL_PEPTIDE_H_REGION: Hydrophobic region of a signal peptide.; SignalP-TM: ; SIGNAL_PEPTIDE_C_REGION: C-terminal region of a signal peptide.	NA	Unknown	signal peptide
Ec-00_006580	Glutathione peroxidase	GO:0004602;GO:0055114;GO:0006979	IPR029759: Glutathione peroxidase active site; SIGNAL_PEPTIDE: Signal peptide region; SIGNAL_PEPTIDE_N_REGION: N-terminal region of a signal peptide.; SIGNAL_PEPTIDE_C_REGION: C-terminal region of a signal peptide.; NON_CYTOPLASMIC_DOMAIN: Region of a membrane-bound protein predicted to be outside the membrane, in the extracellular region; SIGNAL_PEPTIDE_H_REGION: Hydrophobic region of a signal p…	KOG1651	Redox	mitochondrion
Ec-00_006590	EsV-1-163	n/a;n/a;n/a	NON_CYTOPLASMIC_DOMAIN: Region of a membrane-bound protein predicted to be outside the membrane, in the extracellular region; SIGNAL_PEPTIDE: Signal peptide region; SignalP-noTM: ; SIGNAL_PEPTIDE_N_REGION: N-terminal region of a signal peptide.; SIGNAL_PEPTIDE_H_REGION: Hydrophobic region of a signal peptide.; SignalP-TM: ; SIGNAL_PEPTIDE_C_REGION: C-terminal region of a signal peptide.	NA	Transposon or viral gene	signal peptide
Ec-00_006610	PDZ domain	GO:0005515	IPR001478: PDZ domain; Coil:	NA	Membrane function and transporters	other localisation
Ec-00_006620	P-loop containing nucleoside triphosphate hydrolase	n/a;n/a;n/a	SSF50729: ; IPR027417: P-loop containing nucleoside triphosphate hydrolase; PTHR13140: ; IPR001849: Pleckstrin homology domain; IPR000048: IQ motif, EF-hand binding site; IPR020683: Ankyrin repeat-containing domain; IPR011993: Pleckstrin homology-like domain; IPR001609: Myosin head, motor domain; IPR025939: Axin interactor dorsalization-associated protein, C-terminal domain; IPR002110: Ankyrin re…	NA	Metabolism	other localisation
Ec-00_006625	hypothetical protein	NA	NA	NA	Unknown	other localisation
Ec-00_006630	WD40/YVTN repeat-like-containing domain	GO:0005515	PTHR11227:SF18: ; IPR017986: WD40-repeat-containing domain; IPR015943: WD40/YVTN repeat-like-containing domain; PTHR11227:	NA	Protein binding or modification	other localisation
Ec-00_006640	RAN binding protein 16-like, protein transporter	GO:0005488	IPR001494: Importin-beta, N-terminal domain; IPR011989: Armadillo-like helical; PTHR12596: ; IPR016024: Armadillo-type fold	NA	Cellular regulation and signalling	other localisation
Ec-00_006650	Protein of unknown function DUF872, transmembrane	n/a;n/a;n/a	CYTOPLASMIC_DOMAIN: Region of a membrane-bound protein predicted to be outside the membrane, in the cytoplasm.; NON_CYTOPLASMIC_DOMAIN: Region of a membrane-bound protein predicted to be outside the membrane, in the extracellular region; TMhelix: Region of a membrane-bound protein predicted to be embedded in the membrane.; IPR008590: Protein of unknown function DUF872, transmembrane; TRANSMEMBRAN…	NA	Unknown	signal anchor
Ec-00_006660	Peptide methionine sulphoxide reductase MrsB	GO:0033743;GO:0055114	PTHR10173:SF19: ; IPR028427: Peptide methionine sulfoxide reductase; IPR002579: Peptide methionine sulphoxide reductase MrsB; IPR011057: Mss4-like	NA	Protein binding or modification	other localisation
Ec-00_006670	expressed unknown protein	n/a;n/a;n/a	NA	NA	Unknown	nd
Ec-00_006680	Integrins alpha chain	NA	IPR013519: Integrin alpha beta-propellor; TMhelix: Region of a membrane-bound protein predicted to be embedded in the membrane.; SIGNAL_PEPTIDE: Signal peptide region; G3DSA:2.130.10.130: ; SSF69318: ; SIGNAL_PEPTIDE_N_REGION: N-terminal region of a signal peptide.; SIGNAL_PEPTIDE_C_REGION: C-terminal region of a signal peptide.; SignalP-TM: ; NON_CYTOPLASMIC_DOMAIN: Region of a membrane-bound pr…	NA	Membrane function and transporters	signal peptide
Ec-00_006690	Mucin	n/a;n/a;n/a	CYTOPLASMIC_DOMAIN: Region of a membrane-bound protein predicted to be outside the membrane, in the cytoplasm.; NON_CYTOPLASMIC_DOMAIN: Region of a membrane-bound protein predicted to be outside the membrane, in the extracellular region; TMhelix: Region of a membrane-bound protein predicted to be embedded in the membrane.; TRANSMEMBRANE: Region of a membrane-bound protein predicted to be embedded…	NA	Membrane function and transporters	other localisation
Ec-00_006700	similar to ankyrin 3, epithelial isoform e isoform 19	n/a;n/a;n/a	NA	NA	Membrane function and transporters	other localisation
Ec-00_006720	Origin recognition complex, subunit 2	GO:0005515;GO:0008270	NA	NA	DNA or chromatin modification	mitochondrion
Ec-00_006740	expressed unknown protein	n/a;n/a;n/a	NA	NA	Unknown	other localisation
Ec-00_006750	hypothetical protein	n/a;n/a;n/a	NA	NA	Unknown	nd
Ec-00_006760	hypothetical protein	n/a;n/a;n/a	NA	NA	Unknown	other localisation
Ec-00_006770	Jumonji domain and TPR repeat protein	GO:0005515	NA	NA	DNA or chromatin modification	signal peptide
Ec-00_006780	hypothetical protein	n/a;n/a;n/a	NA	NA	Unknown	other localisation
Ec-00_006790	Amino acid transporter, transmembrane	n/a;n/a;n/a	CYTOPLASMIC_DOMAIN: Region of a membrane-bound protein predicted to be outside the membrane, in the cytoplasm.; PTHR22950:SF282: ; NON_CYTOPLASMIC_DOMAIN: Region of a membrane-bound protein predicted to be outside the membrane, in the extracellular region; TMhelix: Region of a membrane-bound protein predicted to be embedded in the membrane.; PTHR22950: ; IPR013057: Amino acid transporter, transme…	NA	Membrane function and transporters	other localisation
Ec-00_006800	EsV-1-7 domain protein	NA	NA	NA	Cellular regulation and signalling	other localisation
Ec-00_006810	Endonuclease/exonuclease/phosphatase	n/a;n/a;n/a	IPR005135: Endonuclease/exonuclease/phosphatase; PTHR12121:	NA	Unknown	other localisation
Ec-00_006820	C2H2 zinc finger protein	GO:0008270;GO:0005622;GO:0003676	NA	KOG1721	Transcription	other localisation
Ec-00_006830	hypothetical protein	n/a;n/a;n/a	NA	NA	Unknown	other localisation
Ec-00_006840	Ribonuclease H-like domain	GO:0006139;GO:0003676;GO:0008408	PTHR13620: ; IPR012337: Ribonuclease H-like domain; IPR002562: 3'-5' exonuclease domain	NA	RNA modification or binding	other localisation
Ec-00_006850	Hypothetical protein	n/a;n/a;n/a	NA	NA	Unknown	nd
Ec-00_006860	expressed unknown protein	n/a;n/a;n/a	NA	NA	Unknown	other localisation
Ec-00_006870	Carbamoyltransferase	GO:0003824;GO:0009058	SIGNAL_PEPTIDE: Signal peptide region; SIGNAL_PEPTIDE_N_REGION: N-terminal region of a signal peptide.; SSF53067: ; SIGNAL_PEPTIDE_C_REGION: C-terminal region of a signal peptide.; NON_CYTOPLASMIC_DOMAIN: Region of a membrane-bound protein predicted to be outside the membrane, in the extracellular region; SignalP-noTM: ; SIGNAL_PEPTIDE_H_REGION: Hydrophobic region of a signal peptide.; IPR003696:…	NA	Metabolism	signal peptide
Ec-00_006880	expressed unknown protein	n/a;n/a;n/a	NA	NA	Unknown	other localisation
Ec-00_006890	Strawberry notch, helicase C domain	GO:0006355;n/a	NA	NA	RNA modification or binding	other localisation
Ec-00_006900	Pectin lyase fold/virulence factor	n/a;n/a;n/a	CYTOPLASMIC_DOMAIN: Region of a membrane-bound protein predicted to be outside the membrane, in the cytoplasm.; NON_CYTOPLASMIC_DOMAIN: Region of a membrane-bound protein predicted to be outside the membrane, in the extracellular region; IPR011050: Pectin lyase fold/virulence factor; TMhelix: Region of a membrane-bound protein predicted to be embedded in the membrane.; PTHR11319: ; IPR012334: Pec…	NA	Cell wall and extracellular	other localisation
Ec-00_006920	hypothetical protein	n/a;n/a;n/a	NA	NA	Unknown	other localisation
Ec-00_006930	expressed unknown protein	n/a;n/a;n/a	NA	NA	Unknown	other localisation
Ec-00_006940	expressed unknown protein	n/a;n/a;n/a	CYTOPLASMIC_DOMAIN: Region of a membrane-bound protein predicted to be outside the membrane, in the cytoplasm.; NON_CYTOPLASMIC_DOMAIN: Region of a membrane-bound protein predicted to be outside the membrane, in the extracellular region; TMhelix: Region of a membrane-bound protein predicted to be embedded in the membrane.; TRANSMEMBRANE: Region of a membrane-bound protein predicted to be embedded…	NA	Unknown	signal anchor
Ec-00_006950	Peptidase S8/S53 domain	GO:0004252;GO:0008236;GO:0006508	TMhelix: Region of a membrane-bound protein predicted to be embedded in the membrane.; IPR000209: Peptidase S8/S53 domain; IPR030400: Sedolisin domain; CYTOPLASMIC_DOMAIN: Region of a membrane-bound protein predicted to be outside the membrane, in the cytoplasm.; NON_CYTOPLASMIC_DOMAIN: Region of a membrane-bound protein predicted to be outside the membrane, in the extracellular region; PTHR14218…	NA	Proteolysis	other localisation
Ec-00_006960	Ammonium transporter	GO:0006810;GO:0008519;GO:0016020	TMhelix: Region of a membrane-bound protein predicted to be embedded in the membrane.; IPR001905: Ammonium transporter; CYTOPLASMIC_DOMAIN: Region of a membrane-bound protein predicted to be outside the membrane, in the cytoplasm.; NON_CYTOPLASMIC_DOMAIN: Region of a membrane-bound protein predicted to be outside the membrane, in the extracellular region; IPR018047: Ammonium transporter, conserve…	NA	Membrane function and transporters	other localisation
Ec-00_006970	Ankyrin repeat-containing domain	n/a;GO:0005515	IPR020683: Ankyrin repeat-containing domain; Coil: ; IPR002110: Ankyrin repeat; PTHR24188:	NA	Membrane function and transporters	other localisation
Ec-00_006990	Aspartic peptidase	GO:0004190;GO:0006508	IPR021109: Aspartic peptidase domain; IPR001461: Aspartic peptidase; PTHR13683:SF253:	NA	Proteolysis	other localisation
Ec-00_007000	Protein-tyrosine phosphatase-like	GO:0016311;GO:0016791	IPR029021: Protein-tyrosine phosphatase-like; IPR016130: Protein-tyrosine phosphatase, active site; IPR000387: Tyrosine specific protein phosphatases domain; PTHR23339:SF70: ; PTHR23339:	NA	Cellular regulation and signalling	other localisation
Ec-00_007010	hypothetical protein	n/a;n/a;n/a	NA	NA	Unknown	other localisation
Ec-00_007020	Zinc finger, RING/FYVE/PHD-type	n/a;n/a;n/a	SSF57850: ; IPR001841: Zinc finger, RING-type; IPR013083: Zinc finger, RING/FYVE/PHD-type	NA	Cellular regulation and signalling	other localisation
Ec-00_007030	Sphingosine-1-phosphate phosphatase	GO:0016020;GO:0003824	CYTOPLASMIC_DOMAIN: Region of a membrane-bound protein predicted to be outside the membrane, in the cytoplasm.; NON_CYTOPLASMIC_DOMAIN: Region of a membrane-bound protein predicted to be outside the membrane, in the extracellular region; PTHR14969: ; TMhelix: Region of a membrane-bound protein predicted to be embedded in the membrane.; IPR000326: Phosphatidic acid phosphatase type 2/haloperoxidas…	KOG2822	Metabolism	mitochondrion
Ec-00_007050	Dolichyl-diphosphooligosaccharide--protein glycosyltransferase subunit STT3A, N-terminal fragment, family GT66	GO:0016020;GO:0006486;GO:0004576	CYTOPLASMIC_DOMAIN: Region of a membrane-bound protein predicted to be outside the membrane, in the cytoplasm.; NON_CYTOPLASMIC_DOMAIN: Region of a membrane-bound protein predicted to be outside the membrane, in the extracellular region; IPR003674: Oligosaccharyl transferase, STT3 subunit; TMhelix: Region of a membrane-bound protein predicted to be embedded in the membrane.; PTHR13872: ; TRANSMEM…	KOG2292	Metabolism	other localisation
Ec-00_007060	Dolichyl-diphosphooligosaccharide--protein glycosyltransferase subunit STT3A, C-terminal fragment, family GT66	GO:0004576;GO:0006486;GO:0016020	PTHR13872:	NA	Metabolism	other localisation
Ec-00_007080	Harbinger transposase-derived nuclease domain	n/a;n/a;n/a	PTHR22930: ; IPR027806: Harbinger transposase-derived nuclease domain	NA	Transposon or viral gene	other localisation
Ec-00_007090	expressed unknown protein	GO:0003824;GO:0005488;GO:0008152	NON_CYTOPLASMIC_DOMAIN: Region of a membrane-bound protein predicted to be outside the membrane, in the extracellular region; SIGNAL_PEPTIDE: Signal peptide region; SIGNAL_PEPTIDE_N_REGION: N-terminal region of a signal peptide.; SIGNAL_PEPTIDE_H_REGION: Hydrophobic region of a signal peptide.; SIGNAL_PEPTIDE_C_REGION: C-terminal region of a signal peptide.	NA	Unknown	other localisation
Ec-00_007100	expressed unknown protein	n/a;n/a;n/a	NA	NA	Unknown	nd
Ec-00_007110	hypothetical protein	n/a;n/a;n/a	NA	NA	Unknown	other localisation
Ec-00_007120	IQ calmodulin-binding motif family protein	n/a;n/a;n/a	PTHR21074:	NA	Cellular regulation and signalling	other localisation
Ec-00_007130	DNA helicase Pif1-like (1860)	DNA or chromatin modification	IPR027417: P-loop containing nucleoside triphosphate hydrolase; PTHR23274: ; IPR010285: DNA helicase Pif1-like	NA	DNA or chromatin modification	other localisation
Ec-00_007140	Major facilitator superfamily	GO:0016021;GO:0055085	CYTOPLASMIC_DOMAIN: Region of a membrane-bound protein predicted to be outside the membrane, in the cytoplasm.; NON_CYTOPLASMIC_DOMAIN: Region of a membrane-bound protein predicted to be outside the membrane, in the extracellular region; IPR020846: Major facilitator superfamily domain; TMhelix: Region of a membrane-bound protein predicted to be embedded in the membrane.; IPR011701: Major facilita…	NA	Membrane function and transporters	other localisation
Ec-00_007150	expressed unknown protein	n/a;n/a;n/a	NA	NA	Unknown	other localisation
Ec-00_007160	Domain of unknown function DUF4414	GO:0005622;GO:0006512;GO:0004842;GO:0006464;GO:0016881	IPR025527: Domain of unknown function DUF4414; IPR000569: HECT; Coil: ; G3DSA:3.30.2160.10: ; PTHR11254:	NA	Unknown	other localisation
Ec-00_007170	hypothetical protein	n/a;n/a;n/a	NON_CYTOPLASMIC_DOMAIN: Region of a membrane-bound protein predicted to be outside the membrane, in the extracellular region; SignalP-noTM: ; SIGNAL_PEPTIDE: Signal peptide region; SIGNAL_PEPTIDE_N_REGION: N-terminal region of a signal peptide.; SIGNAL_PEPTIDE_H_REGION: Hydrophobic region of a signal peptide.; SIGNAL_PEPTIDE_C_REGION: C-terminal region of a signal peptide.	NA	Unknown	other localisation
Ec-00_007180	conserved unknown protein	n/a;n/a;n/a	CYTOPLASMIC_DOMAIN: Region of a membrane-bound protein predicted to be outside the membrane, in the cytoplasm.; NON_CYTOPLASMIC_DOMAIN: Region of a membrane-bound protein predicted to be outside the membrane, in the extracellular region; TMhelix: Region of a membrane-bound protein predicted to be embedded in the membrane.; TRANSMEMBRANE: Region of a membrane-bound protein predicted to be embedded…	NA	Unknown	other localisation
Ec-00_007190	Hypothetical protein	n/a;n/a;n/a	NA	NA	Unknown	other localisation
Ec-00_007210	hypothetical protein	n/a;n/a;n/a	NA	NA	Unknown	other localisation
Ec-00_007220	expressed unknown protein	GO:0001584;GO:0007186;GO:0016021	NA	NA	Unknown	other localisation
Ec-00_007230	hypothetical protein	n/a;n/a;n/a	NA	NA	Unknown	nd
Ec-00_007240	Hypothetical protein	n/a;n/a;n/a	CYTOPLASMIC_DOMAIN: Region of a membrane-bound protein predicted to be outside the membrane, in the cytoplasm.; NON_CYTOPLASMIC_DOMAIN: Region of a membrane-bound protein predicted to be outside the membrane, in the extracellular region; TRANSMEMBRANE: Region of a membrane-bound protein predicted to be embedded in the membrane.	NA	Unknown	other localisation
Ec-00_007250	Carbohydrate-binding WSC, subgroup	n/a;n/a;n/a	IPR013994: Carbohydrate-binding WSC, subgroup; SIGNAL_PEPTIDE: Signal peptide region; IPR002889: Carbohydrate-binding WSC; PTHR19297: ; SIGNAL_PEPTIDE_N_REGION: N-terminal region of a signal peptide.; SIGNAL_PEPTIDE_C_REGION: C-terminal region of a signal peptide.; NON_CYTOPLASMIC_DOMAIN: Region of a membrane-bound protein predicted to be outside the membrane, in the extracellular region; SignalP…	NA	Cell wall and extracellular	signal peptide
Ec-00_007260	hypothetical protein	n/a;n/a;n/a	Coil:	NA	Unknown	other localisation
Ec-00_007270	Unsaturated glucuronyl hydrolase, family GH88	GO:0003824	IPR012341: Six-hairpin glycosidase; IPR010905: Glycosyl hydrolase, family 88; IPR008928: Six-hairpin glycosidase-like	NA	Metabolism	other localisation
Ec-00_007280	expressed unknown protein	n/a;n/a;n/a	NA	NA	Unknown	other localisation
Ec-00_007290	expressed unknown protein	n/a;n/a;n/a	NA	NA	Unknown	other localisation
Ec-00_007300	Peptidase M14, carboxypeptidase A	GO:0004181;GO:0006508;GO:0008270	PTHR12756: ; IPR000834: Peptidase M14, carboxypeptidase A; SSF53187: ; G3DSA:3.40.630.10:	NA	Proteolysis	other localisation
Ec-00_007310	Sodium/potassium/calcium exchanger	GO:0016020;GO:0005432;GO:0055085;GO:0006816;GO:0016021	CYTOPLASMIC_DOMAIN: Region of a membrane-bound protein predicted to be outside the membrane, in the cytoplasm.; NON_CYTOPLASMIC_DOMAIN: Region of a membrane-bound protein predicted to be outside the membrane, in the extracellular region; IPR004481: Sodium/potassium/calcium exchanger; IPR004837: Sodium/calcium exchanger membrane region; TMhelix: Region of a membrane-bound protein predicted to be e…	NA	Membrane function and transporters	signal anchor
Ec-00_007320	ICln	GO:0006884;GO:0034709;GO:0034715;GO:0006821;GO:0005829;GO:0005886;GO:0000387	IPR003521: ICln; PF03517: Regulator of volume decrease after cellular swelling	NA	Membrane function and transporters	other localisation
Ec-00_007330	DNA-directed RNA polymerase, RBP11-like dimerisation domain	GO:0006351;GO:0046983	PTHR13946:SF16: ; G3DSA:3.30.1360.10: ; PF13656: RNA polymerase Rpb3/Rpb11 dimerisation domain; IPR008193: DNA-directed RNA polymerase Rpb11, 13-16kDa subunit, conserved site; PTHR13946: ; Coil: ; IPR009025: DNA-directed RNA polymerase, RBP11-like dimerisation domain	NA	Transcription	other localisation
Ec-00_007340	Novel Sm-like protein with long N- and C-terminal domains.	NA	PTHR13542: ; IPR019181: Anticodon-binding domain	NA	RNA modification or binding	other localisation
Ec-00_007350	UbiA prenyltransferase family	GO:0004659;GO:0016021	IPR030470: UbiA prenyltransferase conserved site; SIGNAL_PEPTIDE: Signal peptide region; TMhelix: Region of a membrane-bound protein predicted to be embedded in the membrane.; IPR006370: 4-hydroxybenzoate polyprenyltransferase; SIGNAL_PEPTIDE_N_REGION: N-terminal region of a signal peptide.; SIGNAL_PEPTIDE_C_REGION: C-terminal region of a signal peptide.; CYTOPLASMIC_DOMAIN: Region of a membrane-…	NA	Metabolism	signal peptide
Ec-00_007360	4-hydroxybenzoate nonaprenyltransferase	n/a;n/a;n/a	NON_CYTOPLASMIC_DOMAIN: Region of a membrane-bound protein predicted to be outside the membrane, in the extracellular region; SIGNAL_PEPTIDE: Signal peptide region; TMhelix: Region of a membrane-bound protein predicted to be embedded in the membrane.; PTHR11048: ; SIGNAL_PEPTIDE_N_REGION: N-terminal region of a signal peptide.; SIGNAL_PEPTIDE_H_REGION: Hydrophobic region of a signal peptide.; SIG…	NA	Metabolism	nd
Ec-00_007370	expressed unknown protein	n/a;n/a;n/a	Coil:	NA	Unknown	other localisation
Ec-00_007380	conserved unknown protein	n/a;n/a;n/a	TMhelix: Region of a membrane-bound protein predicted to be embedded in the membrane.; SIGNAL_PEPTIDE: Signal peptide region; SIGNAL_PEPTIDE_N_REGION: N-terminal region of a signal peptide.; SignalP-TM: ; SIGNAL_PEPTIDE_C_REGION: C-terminal region of a signal peptide.; NON_CYTOPLASMIC_DOMAIN: Region of a membrane-bound protein predicted to be outside the membrane, in the extracellular region; Coi…	NA	Unknown	chloroplast
Ec-00_007390	Molybdenum cofactor sulfurase, C-terminal	GO:0003824;GO:0006777;GO:0008265;GO:0030151;GO:0030170	IPR005303: MOSC, N-terminal beta barrel; IPR011037: Pyruvate kinase-like, insert domain; IPR015424: Pyridoxal phosphate-dependent transferase; PTHR14237: ; IPR000192: Aminotransferase class V domain; IPR028886: Molybdenum cofactor sulfurase; IPR005302: Molybdenum cofactor sulfurase, C-terminal; SSF141673: ; PTHR14237:SF19: ; IPR015421: Pyridoxal phosphate-dependent transferase, major region, subd…	NA	Metabolism	other localisation
Ec-00_007410	EsV-1-166	GO:0004553;GO:0005576;GO:0005975;GO:0019028;GO:0030248	SIGNAL_PEPTIDE: Signal peptide region; IPR004302: Chitin-binding, domain 3; SIGNAL_PEPTIDE_N_REGION: N-terminal region of a signal peptide.; PTHR21113: ; SIGNAL_PEPTIDE_C_REGION: C-terminal region of a signal peptide.; NON_CYTOPLASMIC_DOMAIN: Region of a membrane-bound protein predicted to be outside the membrane, in the extracellular region; IPR000254: Cellulose-binding domain, fungal; SIGNAL_PE…	NA	Cell wall and extracellular	other localisation
Ec-00_007420	expressed unknown protein	n/a;n/a;n/a	NA	NA	Unknown	other localisation
Ec-00_007430	expressed unknown protein	n/a;n/a;n/a	CYTOPLASMIC_DOMAIN: Region of a membrane-bound protein predicted to be outside the membrane, in the cytoplasm.; NON_CYTOPLASMIC_DOMAIN: Region of a membrane-bound protein predicted to be outside the membrane, in the extracellular region; TMhelix: Region of a membrane-bound protein predicted to be embedded in the membrane.; TRANSMEMBRANE: Region of a membrane-bound protein predicted to be embedded…	NA	Unknown	other localisation
Ec-00_007440	Hypothetical protein	n/a;n/a;n/a	NON_CYTOPLASMIC_DOMAIN: Region of a membrane-bound protein predicted to be outside the membrane, in the extracellular region; SIGNAL_PEPTIDE: Signal peptide region; SIGNAL_PEPTIDE_N_REGION: N-terminal region of a signal peptide.; SIGNAL_PEPTIDE_H_REGION: Hydrophobic region of a signal peptide.; SIGNAL_PEPTIDE_C_REGION: C-terminal region of a signal peptide.	NA	Unknown	other localisation
Ec-00_007450	expressed unknown protein	n/a;n/a;n/a	NA	NA	Unknown	other localisation
Ec-00_007460	Nucleotide-diphospho-sugar transferase	n/a;n/a;n/a	SIGNAL_PEPTIDE: Signal peptide region; SIGNAL_PEPTIDE_N_REGION: N-terminal region of a signal peptide.; SignalP-TM: ; SIGNAL_PEPTIDE_C_REGION: C-terminal region of a signal peptide.; NON_CYTOPLASMIC_DOMAIN: Region of a membrane-bound protein predicted to be outside the membrane, in the extracellular region; SignalP-noTM: ; SIGNAL_PEPTIDE_H_REGION: Hydrophobic region of a signal peptide.; IPR00506…	NA	Metabolism	signal peptide
Ec-00_007470	Hypothetical protein	n/a;n/a;n/a	NA	NA	Unknown	nd
Ec-00_007480	Glycosyltransferase, family GT4	GO:0009058	SSF53756: ; TMhelix: Region of a membrane-bound protein predicted to be embedded in the membrane.; IPR001296: Glycosyl transferase, family 1; PTHR12526: ; G3DSA:3.40.50.2000: ; CYTOPLASMIC_DOMAIN: Region of a membrane-bound protein predicted to be outside the membrane, in the cytoplasm.; NON_CYTOPLASMIC_DOMAIN: Region of a membrane-bound protein predicted to be outside the membrane, in the extrac…	NA	Metabolism	other localisation
Ec-00_007530	Hypothetical protein	n/a;n/a;n/a	PTHR24114: ; SSF52047: ; IPR032675: Leucine-rich repeat domain, L domain-like; IPR003590: Leucine-rich repeat, ribonuclease inhibitor subtype	NA	Unknown	other localisation
Ec-00_007540	Hypothetical protein	n/a;n/a;n/a	NA	NA	Unknown	other localisation
Ec-00_007550	Hypothetical protein	n/a;n/a;n/a	NA	NA	Unknown	nd
Ec-00_007560	MULE transposase domain	n/a;n/a;n/a	IPR018289: MULE transposase domain; IPR031052: FHY3/FAR1 family; PTHR31669:SF3:	NA	Transposon or viral gene	other localisation
Ec-00_007570	Hypothetical protein	n/a;n/a;n/a	NA	NA	Unknown	nd
Ec-00_007580	hypothetical protein	n/a;n/a;n/a	CYTOPLASMIC_DOMAIN: Region of a membrane-bound protein predicted to be outside the membrane, in the cytoplasm.; NON_CYTOPLASMIC_DOMAIN: Region of a membrane-bound protein predicted to be outside the membrane, in the extracellular region; TMhelix: Region of a membrane-bound protein predicted to be embedded in the membrane.; TRANSMEMBRANE: Region of a membrane-bound protein predicted to be embedded…	NA	Unknown	other localisation
Ec-00_007590	5'-3' exoribonuclease	GO:0005622;GO:0003676;GO:0004527	IPR027073: 5'-3' exoribonuclease; IPR017151: 5'-3' exoribonuclease 2/3; Coil: ; IPR004859: Putative 5-3 exonuclease	NA	RNA modification or binding	other localisation
Ec-00_007600	conserved unknown protein	n/a;n/a;n/a	PR01228: Eggshell protein signature	NA	Unknown	other localisation
Ec-00_007620	Sept8ps, septin GTPase, pseudogene	NA	CYTOPLASMIC_DOMAIN: Region of a membrane-bound protein predicted to be outside the membrane, in the cytoplasm.; NON_CYTOPLASMIC_DOMAIN: Region of a membrane-bound protein predicted to be outside the membrane, in the extracellular region; TMhelix: Region of a membrane-bound protein predicted to be embedded in the membrane.; TRANSMEMBRANE: Region of a membrane-bound protein predicted to be embedded…	NA	Cytoskeleton and flagella	signal anchor
Ec-00_007630	Notch domain	GO:0016020;GO:0030154	NON_CYTOPLASMIC_DOMAIN: Region of a membrane-bound protein predicted to be outside the membrane, in the extracellular region; SIGNAL_PEPTIDE: Signal peptide region; SIGNAL_PEPTIDE_N_REGION: N-terminal region of a signal peptide.; IPR000800: Notch domain; SIGNAL_PEPTIDE_H_REGION: Hydrophobic region of a signal peptide.; SIGNAL_PEPTIDE_C_REGION: C-terminal region of a signal peptide.	NA	Cellular regulation and signalling	other localisation
Ec-00_007640	Hypothetical protein	n/a;n/a;n/a	NA	NA	Unknown	mitochondrion
Ec-00_007650	hypothetical protein	GO:0031177	NA	NA	Unknown	other localisation
Ec-00_007660	PIN domain-like	GO:0004518;GO:0006281	TMhelix: Region of a membrane-bound protein predicted to be embedded in the membrane.; IPR029060: PIN domain-like	NA	RNA modification or binding	other localisation
Ec-00_007670	telomerase reverse transcriptase catalytic subunit splice variant a	n/a;n/a;n/a	IPR000477: Reverse transcriptase domain; PTHR12066:	NA	RNA modification or binding	other localisation
Ec-00_007680	Telomerase ribonucleoprotein complex - RNA-binding domain	GO:0003964	CYTOPLASMIC_DOMAIN: Region of a membrane-bound protein predicted to be outside the membrane, in the cytoplasm.; NON_CYTOPLASMIC_DOMAIN: Region of a membrane-bound protein predicted to be outside the membrane, in the extracellular region; PTHR12066: ; IPR021891: Telomerase ribonucleoprotein complex - RNA-binding domain; TRANSMEMBRANE: Region of a membrane-bound protein predicted to be embedded in …	NA	RNA modification or binding	other localisation
Ec-00_007690	serine/threonine protein kinase	GO:0004672;GO:0005524;GO:0006468	IPR017441: Protein kinase, ATP binding site; IPR002290: Serine/threonine/dual specificity protein kinase, catalytic domain; G3DSA:3.30.200.20: ; PTHR24362: ; SSF57997: ; IPR011009: Protein kinase-like domain; IPR000719: Protein kinase domain; G3DSA:1.10.510.10: ; Coil:	NA	Cellular regulation and signalling	other localisation
Ec-00_007700	expressed unknown protein	n/a;n/a;n/a	NA	NA	Unknown	nd
Ec-00_007710	EsV-1-7 domain protein	n/a;n/a;n/a	NA	NA	Cellular regulation and signalling	other localisation
Ec-00_007720	Protein of unknown function DUF2854	n/a;n/a;n/a	TMhelix: Region of a membrane-bound protein predicted to be embedded in the membrane.; SIGNAL_PEPTIDE: Signal peptide region; SIGNAL_PEPTIDE_N_REGION: N-terminal region of a signal peptide.; SignalP-TM: ; SIGNAL_PEPTIDE_C_REGION: C-terminal region of a signal peptide.; NON_CYTOPLASMIC_DOMAIN: Region of a membrane-bound protein predicted to be outside the membrane, in the extracellular region; Sig…	NA	Unknown	chloroplast
Ec-00_007730	Complex 1 LYR protein	n/a;n/a;n/a	IPR008011: Complex 1 LYR protein	NA	Metabolism	other localisation
Ec-00_007740	PHflX, plastid HflX GTPase	GO:0005525	IPR025121: GTPase HflX N-terminal domain; IPR016496: GTPase HflX; SIGNAL_PEPTIDE: Signal peptide region; IPR027417: P-loop containing nucleoside triphosphate hydrolase; SIGNAL_PEPTIDE_N_REGION: N-terminal region of a signal peptide.; SignalP-TM: ; SIGNAL_PEPTIDE_C_REGION: C-terminal region of a signal peptide.; IPR030394: HflX-type guanine nucleotide-binding (G) domain; NON_CYTOPLASMIC_DOMAIN: Re…	NA	Protein synthesis	chloroplast
Ec-00_007750	Major facilitator superfamily	GO:0055085;GO:0016021	TMhelix: Region of a membrane-bound protein predicted to be embedded in the membrane.; SIGNAL_PEPTIDE: Signal peptide region; SIGNAL_PEPTIDE_N_REGION: N-terminal region of a signal peptide.; SignalP-TM: ; SIGNAL_PEPTIDE_C_REGION: C-terminal region of a signal peptide.; CYTOPLASMIC_DOMAIN: Region of a membrane-bound protein predicted to be outside the membrane, in the cytoplasm.; IPR020846: Major …	NA	Membrane function and transporters	signal peptide
Ec-00_007760	hypothetical protein	n/a;n/a;n/a	SignalP-TM:	NA	Unknown	mitochondrion
Ec-00_007780	Carbohydrate-binding WSC	n/a;n/a;n/a	PTHR19328: ; IPR013994: Carbohydrate-binding WSC, subgroup; IPR012938: Glucose/Sorbosone dehydrogenase; SIGNAL_PEPTIDE: Signal peptide region; IPR002889: Carbohydrate-binding WSC; SIGNAL_PEPTIDE_N_REGION: N-terminal region of a signal peptide.; IPR011042: Six-bladed beta-propeller, TolB-like; SignalP-TM: ; SIGNAL_PEPTIDE_C_REGION: C-terminal region of a signal peptide.; NON_CYTOPLASMIC_DOMAIN: Re…	NA	Cell wall and extracellular	signal peptide
Ec-00_007800	myosin-like antigen	n/a;n/a;n/a	Coil:	NA	Cytoskeleton and flagella	other localisation
Ec-00_007810	hypothetical protein	n/a;n/a;n/a	Coil:	NA	Unknown	other localisation
Ec-00_007820	GDP-mannose transporter	n/a;n/a;n/a	CYTOPLASMIC_DOMAIN: Region of a membrane-bound protein predicted to be outside the membrane, in the cytoplasm.; NON_CYTOPLASMIC_DOMAIN: Region of a membrane-bound protein predicted to be outside the membrane, in the extracellular region; IPR004853: Triose-phosphate transporter domain; TMhelix: Region of a membrane-bound protein predicted to be embedded in the membrane.; PTHR11132: ; TRANSMEMBRANE…	NA	Membrane function and transporters	other localisation
Ec-00_007830	Domain of unknown function DUF4168	n/a;n/a;n/a	IPR025433: Domain of unknown function DUF4168	NA	Unknown	other localisation
Ec-00_007840	EamA domain	GO:0016020;GO:0016021	CYTOPLASMIC_DOMAIN: Region of a membrane-bound protein predicted to be outside the membrane, in the cytoplasm.; SSF103481: ; PTHR12715: ; NON_CYTOPLASMIC_DOMAIN: Region of a membrane-bound protein predicted to be outside the membrane, in the extracellular region; IPR000620: EamA domain; TRANSMEMBRANE: Region of a membrane-bound protein predicted to be embedded in the membrane.	NA	Membrane function and transporters	signal peptide
Ec-00_007850	Hypothetical protein	n/a;n/a;n/a	NA	NA	Unknown	nd
Ec-00_007870	Hypothetical protein	n/a;n/a;n/a	NA	NA	Unknown	nd
Ec-00_007880	expressed unknown protein	n/a;n/a;n/a	Coil:	NA	Unknown	other localisation
Ec-00_007900	Cyclin, N-terminal	n/a;GO:0051726	IPR013763: Cyclin-like; IPR006671: Cyclin, N-terminal; IPR012388: CDK5 and ABL1 enzyme substrate 1/2	NA	Cell cycle	other localisation
Ec-00_007910	expressed unknown protein	n/a;n/a;n/a	NA	NA	Unknown	other localisation
Ec-00_007920	hypothetical protein	n/a;n/a;n/a	NA	NA	Unknown	other localisation
Ec-00_007940	Cyclophilin-like domain	GO:0003755;GO:0006457	IPR024936: Cyclophilin-type peptidyl-prolyl cis-trans isomerase; IPR002130: Cyclophilin-type peptidyl-prolyl cis-trans isomerase domain; IPR029000: Cyclophilin-like domain; IPR020892: Cyclophilin-type peptidyl-prolyl cis-trans isomerase, conserved site	NA	Protein binding or modification	other localisation
Ec-00_007960	expressed unknown protein	n/a;n/a;n/a	NA	NA	Unknown	other localisation
Ec-00_007970	hypothetical protein	n/a;n/a;n/a	NA	NA	Unknown	other localisation
Ec-00_007980	Cdc23	GO:0005680;GO:0030071	PTHR12558:SF10: ; PTHR12558: ; IPR007192: Cdc23	NA	Cell cycle	other localisation
Ec-00_007990	Prefoldin beta-like	GO:0006457;GO:0016272;GO:0051082	IPR009053: Prefoldin; IPR002777: Prefoldin beta-like; PTHR21431: ; Coil:	NA	Protein binding or modification	other localisation
Ec-00_008000	Hypothetical protein	n/a;n/a;n/a	NA	NA	Unknown	other localisation
Ec-00_008010	Ribonuclease H-like domain	GO:0003676	IPR012337: Ribonuclease H-like domain; PTHR23272:	NA	RNA modification or binding	other localisation
Ec-00_008020	hypothetical protein	n/a;n/a;n/a	NA	NA	Unknown	other localisation
Ec-00_008030	hypothetical protein	n/a;n/a;n/a	CYTOPLASMIC_DOMAIN: Region of a membrane-bound protein predicted to be outside the membrane, in the cytoplasm.; NON_CYTOPLASMIC_DOMAIN: Region of a membrane-bound protein predicted to be outside the membrane, in the extracellular region; TMhelix: Region of a membrane-bound protein predicted to be embedded in the membrane.; Coil: ; TRANSMEMBRANE: Region of a membrane-bound protein predicted to be …	NA	Unknown	other localisation
Ec-00_008040	expressed unknown protein	n/a;n/a;n/a	NA	NA	Unknown	other localisation
Ec-00_008050	conserved unknown protein	n/a;GO:0005515	PTHR16263: ; IPR011990: Tetratricopeptide-like helical domain; SignalP-TM:	NA	Unknown	mitochondrion
Ec-00_008060	Cathepsin-like proteinase	GO:0006508;GO:0008234	TMhelix: Region of a membrane-bound protein predicted to be embedded in the membrane.; SSF54001: ; IPR000169: Cysteine peptidase, cysteine active site; IPR013201: Proteinase inhibitor I29, cathepsin propeptide; IPR013128: Peptidase C1A; CYTOPLASMIC_DOMAIN: Region of a membrane-bound protein predicted to be outside the membrane, in the cytoplasm.; IPR025661: Cysteine peptidase, asparagine active s…	KOG1543	Proteolysis	other localisation
Ec-00_008070	von Willebrand factor, type A	n/a;n/a;n/a	SIGNAL_PEPTIDE: Signal peptide region; IPR002369: Integrin beta subunit, N-terminal; SIGNAL_PEPTIDE_N_REGION: N-terminal region of a signal peptide.; PF13519: von Willebrand factor type A domain; PR01217: Proline rich extensin signature; PTHR22992: ; SIGNAL_PEPTIDE_C_REGION: C-terminal region of a signal peptide.; NON_CYTOPLASMIC_DOMAIN: Region of a membrane-bound protein predicted to be outside …	NA	Cell wall and extracellular	chloroplast
Ec-00_008080	Hypothetical protein	n/a;n/a;n/a	NA	NA	Unknown	other localisation
Ec-00_008090	Hypothetical protein	n/a;n/a;n/a	NA	NA	Unknown	nd
Ec-00_008100	hypothetical protein	n/a;n/a;n/a	NA	NA	Unknown	mitochondrion
Ec-00_008110	expressed unknown protein	n/a;n/a;n/a	Coil:	NA	Unknown	other localisation
Ec-00_008130	hypothetical protein	GO:0005488	IPR009976: Exocyst complex component Sec10-like; PTHR12100:SF0:	NA	Unknown	other localisation
Ec-00_008140	hypothetical protein	n/a;n/a;n/a	NON_CYTOPLASMIC_DOMAIN: Region of a membrane-bound protein predicted to be outside the membrane, in the extracellular region; SignalP-noTM: ; PS51257: Prokaryotic membrane lipoprotein lipid attachment site profile.; SIGNAL_PEPTIDE: Signal peptide region; SIGNAL_PEPTIDE_N_REGION: N-terminal region of a signal peptide.; SIGNAL_PEPTIDE_H_REGION: Hydrophobic region of a signal peptide.; SignalP-TM: ;…	NA	Unknown	signal peptide
Ec-00_008150	expressed unknown protein	n/a;n/a;n/a	NA	NA	Unknown	other localisation
Ec-00_008160	hypothetical protein	n/a;n/a;n/a	NA	NA	Unknown	other localisation
Ec-00_008170	Hypothetical protein	n/a;n/a;n/a	CYTOPLASMIC_DOMAIN: Region of a membrane-bound protein predicted to be outside the membrane, in the cytoplasm.; NON_CYTOPLASMIC_DOMAIN: Region of a membrane-bound protein predicted to be outside the membrane, in the extracellular region; TMhelix: Region of a membrane-bound protein predicted to be embedded in the membrane.; TRANSMEMBRANE: Region of a membrane-bound protein predicted to be embedded…	NA	Unknown	other localisation
Ec-00_008190	MyTH4 domain	GO:0005856	IPR001452: SH3 domain; PTHR23177: ; G3DSA:2.30.30.40: ; IPR000857: MyTH4 domain	NA	Cytoskeleton and flagella	other localisation
Ec-00_008200	Zinc finger, MYND-type	GO:0008270	IPR002893: Zinc finger, MYND-type; SSF144232:	NA	Cellular regulation and signalling	other localisation
Ec-00_008210	Catalase-peroxidase haem	GO:0004096;GO:0004601;GO:0006979;GO:0020037;GO:0055114	NA	NA	Redox	other localisation
Ec-00_008215	hypothetical protein	GO:0004096;GO:0004601;GO:0006979;GO:0020037;GO:0055114	IPR010255: Haem peroxidase; IPR000763: Catalase-peroxidase haem; G3DSA:1.10.520.10: ; cd00314: plant_peroxidase_like; G3DSA:1.10.420.10: ; PTHR30555:SF8: ; IPR019793: Peroxidases heam-ligand binding site; IPR002016: Haem peroxidase, plant/fungal/bacterial	NA	Unknown	mitochondrion
Ec-00_008220	Catalase decomposes hydrogen peroxide to molecular oxygen and water	GO:0020037;GO:0055114;GO:0006979;GO:0004601	G3DSA:1.10.520.10: ; SIGNAL_PEPTIDE: Signal peptide region; PS51257: Prokaryotic membrane lipoprotein lipid attachment site profile.; TMhelix: Region of a membrane-bound protein predicted to be embedded in the membrane.; SIGNAL_PEPTIDE_N_REGION: N-terminal region of a signal peptide.; SIGNAL_PEPTIDE_C_REGION: C-terminal region of a signal peptide.; SignalP-TM: ; PTHR30555: ; NON_CYTOPLASMIC_DOMAI…	NA	Redox	signal peptide
Ec-00_008230	catalase/peroxidase	n/a;n/a;n/a	IPR016300: Arsenical pump ATPase, ArsA/GET3; IPR027417: P-loop containing nucleoside triphosphate hydrolase; PTHR10803:SF0: ; IPR025723: Anion-transporting ATPase-like domain	NA	Redox	other localisation
Ec-00_008240	Catalase decomposes hydrogen peroxide to molecular oxygen and water.	GO:0004601;GO:0006979;GO:0020037;GO:0055114	PTHR30555: ; IPR010255: Haem peroxidase; IPR000763: Catalase-peroxidase haem; G3DSA:1.10.520.10: ; G3DSA:1.10.420.10: ; IPR019793: Peroxidases heam-ligand binding site; IPR002016: Haem peroxidase, plant/fungal/bacterial	NA	Redox	other localisation
Ec-00_008250	Haem peroxidase	GO:0020037;GO:0055114;GO:0006979;GO:0004601	IPR010255: Haem peroxidase; G3DSA:1.10.420.10:	NA	Metabolism	other localisation
Ec-00_008260	hypothetical protein	n/a;n/a;n/a	NA	NA	Unknown	other localisation
Ec-00_008270	Harbinger transposase-derived nuclease domain	n/a;n/a;n/a	PTHR22930: ; IPR027806: Harbinger transposase-derived nuclease domain	NA	Transposon or viral gene	other localisation
Ec-00_008280	Tyrosinase copper-binding domain	GO:0008152;GO:0016491	IPR008922: Uncharacterised domain, di-copper centre; IPR002227: Tyrosinase copper-binding domain	NA	Metabolism	other localisation
Ec-00_008290	hypothetical protein	n/a;n/a;n/a	NA	NA	Unknown	other localisation
Ec-00_008300	hypothetical protein	n/a;n/a;n/a	SIGNAL_PEPTIDE: Signal peptide region; SIGNAL_PEPTIDE_C_REGION: C-terminal region of a signal peptide.; CYTOPLASMIC_DOMAIN: Region of a membrane-bound protein predicted to be outside the membrane, in the cytoplasm.; NON_CYTOPLASMIC_DOMAIN: Region of a membrane-bound protein predicted to be outside the membrane, in the extracellular region; SignalP-noTM: ; Coil: ; SIGNAL_PEPTIDE_H_REGION: Hydropho…	NA	Unknown	signal peptide
Ec-00_008310	Hypothetical protein	n/a;n/a;n/a	NA	NA	Unknown	other localisation
Ec-00_008320	Exocyst complex component Sec10-like	GO:0005737;GO:0048278;GO:0006887	IPR009976: Exocyst complex component Sec10-like; Coil:	NA	Vesicle trafficking and secretion	other localisation
Ec-00_008330	Exocyst complex component Sec10-like	GO:0005737;GO:0006887;GO:0048278	IPR009976: Exocyst complex component Sec10-like; PTHR12100:SF0:	NA	Vesicle trafficking and secretion	other localisation
Ec-00_008340	Hypothetical protein	n/a;n/a;n/a	NA	NA	Unknown	other localisation
Ec-00_008350	Amino acid/polyamine transporter I	GO:0016020;GO:0003333;GO:0015171	CYTOPLASMIC_DOMAIN: Region of a membrane-bound protein predicted to be outside the membrane, in the cytoplasm.; NON_CYTOPLASMIC_DOMAIN: Region of a membrane-bound protein predicted to be outside the membrane, in the extracellular region; TMhelix: Region of a membrane-bound protein predicted to be embedded in the membrane.; IPR002293: Amino acid/polyamine transporter I; TRANSMEMBRANE: Region of a …	NA	Membrane function and transporters	other localisation
Ec-00_008360	Glutathione S-transferase	GO:0005515	NA	KOG1695	Redox	other localisation
Ec-00_008370	Glutathione S-transferase	GO:0005515	PTHR11571: ; IPR010987: Glutathione S-transferase, C-terminal-like; IPR004046: Glutathione S-transferase, C-terminal; IPR004045: Glutathione S-transferase, N-terminal; IPR012336: Thioredoxin-like fold	KOG1695	Redox	other localisation
Ec-00_008380	Glutathione S-transferase	GO:0005515	PTHR11571: ; IPR010987: Glutathione S-transferase, C-terminal-like; IPR012336: Thioredoxin-like fold; IPR004045: Glutathione S-transferase, N-terminal	KOG1695	Redox	other localisation
Ec-00_008400	hypothetical protein	n/a;n/a;n/a	IPR011990: Tetratricopeptide-like helical domain; IPR013026: Tetratricopeptide repeat-containing domain; IPR019734: Tetratricopeptide repeat	NA	Unknown	other localisation
Ec-00_008410	hypothetical protein	n/a;n/a;n/a	NA	NA	Unknown	other localisation
Ec-00_008420	Hypothetical protein	n/a;n/a;n/a	NON_CYTOPLASMIC_DOMAIN: Region of a membrane-bound protein predicted to be outside the membrane, in the extracellular region; SignalP-noTM: ; SIGNAL_PEPTIDE: Signal peptide region; SIGNAL_PEPTIDE_N_REGION: N-terminal region of a signal peptide.; SIGNAL_PEPTIDE_H_REGION: Hydrophobic region of a signal peptide.; SIGNAL_PEPTIDE_C_REGION: C-terminal region of a signal peptide.	NA	Unknown	nd
Ec-00_008430	Ribonuclease Zc3h12a-like	NA	SSF48452: ; IPR021869: Ribonuclease Zc3h12a-like; PTHR12876: ; IPR011990: Tetratricopeptide-like helical domain; IPR018834: DNA/RNA-binding domain, Est1-type	NA	RNA modification or binding	other localisation
Ec-00_008440	Protein kinase, C-terminal	GO:0004674;GO:0005524;GO:0006468	IPR017441: Protein kinase, ATP binding site; IPR002290: Serine/threonine/dual specificity protein kinase, catalytic domain; G3DSA:3.30.200.20: ; SignalP-TM: ; PTHR24351:SF65: ; IPR017892: Protein kinase, C-terminal; IPR011009: Protein kinase-like domain; IPR008271: Serine/threonine-protein kinase, active site; IPR000961: AGC-kinase, C-terminal; IPR000719: Protein kinase domain; G3DSA:1.10.510.10:…	NA	Cellular regulation and signalling	other localisation
Ec-00_008450	expressed unknown protein	n/a;n/a;n/a	CYTOPLASMIC_DOMAIN: Region of a membrane-bound protein predicted to be outside the membrane, in the cytoplasm.; NON_CYTOPLASMIC_DOMAIN: Region of a membrane-bound protein predicted to be outside the membrane, in the extracellular region; SIGNAL_PEPTIDE: Signal peptide region; SIGNAL_PEPTIDE_N_REGION: N-terminal region of a signal peptide.; SIGNAL_PEPTIDE_H_REGION: Hydrophobic region of a signal p…	NA	Unknown	other localisation
Ec-00_008460	Pleckstrin homology-like domain	n/a;n/a;n/a	SSF50729: ; IPR011993: Pleckstrin homology-like domain; IPR001849: Pleckstrin homology domain	NA	Cellular regulation and signalling	other localisation
Ec-00_008480	Myosin head, motor domain	GO:0005524;GO:0003774;GO:0016459	NA	NA	Cytoskeleton and flagella	other localisation
Ec-00_008490	conserved unknown protein	n/a;n/a;n/a	TMhelix: Region of a membrane-bound protein predicted to be embedded in the membrane.; SIGNAL_PEPTIDE: Signal peptide region; SIGNAL_PEPTIDE_N_REGION: N-terminal region of a signal peptide.; SIGNAL_PEPTIDE_C_REGION: C-terminal region of a signal peptide.; CYTOPLASMIC_DOMAIN: Region of a membrane-bound protein predicted to be outside the membrane, in the cytoplasm.; NON_CYTOPLASMIC_DOMAIN: Region …	NA	Unknown	other localisation
Ec-00_008500	Integrin alpha chain	NA	IPR000413: Integrin alpha chain; PTHR23221: ; TMhelix: Region of a membrane-bound protein predicted to be embedded in the membrane.; G3DSA:2.130.10.130: ; SIGNAL_PEPTIDE_N_REGION: N-terminal region of a signal peptide.; SignalP-TM: ; NON_CYTOPLASMIC_DOMAIN: Region of a membrane-bound protein predicted to be outside the membrane, in the extracellular region; SIGNAL_PEPTIDE_H_REGION: Hydrophobic re…	NA	Membrane function and transporters	signal peptide
Ec-00_008510	Mini-chromosome maintenance, DNA-dependent ATPase	GO:0003677;GO:0005524;GO:0006260	IPR001208: Mini-chromosome maintenance, DNA-dependent ATPase; PTHR11630:	NA	DNA or chromatin modification	other localisation
Ec-00_008520	conserved unknown protein	n/a;n/a;n/a	NA	NA	Unknown	other localisation
Ec-00_008530	WD40-repeat-containing domain	GO:0005515	IPR017986: WD40-repeat-containing domain; IPR019775: WD40 repeat, conserved site; IPR015943: WD40/YVTN repeat-like-containing domain; IPR001680: WD40 repeat; IPR006595: CTLH, C-terminal LisH motif; PTHR22848:	NA	Protein binding or modification	other localisation
Ec-00_008550	Armadillo-like fold protein	GO:0005488	NA	NA	Cellular regulation and signalling	nd
Ec-00_008560	Armadillo-type fold	GO:0005488	IPR026683: Serine/threonine-protein kinase TOR; IPR018392: LysM domain; IPR011989: Armadillo-like helical; PTHR11139: ; IPR016024: Armadillo-type fold	NA	Cellular regulation and signalling	other localisation
Ec-00_008580	Zinc finger, RING/FYVE/PHD-type	n/a;n/a;n/a	SSF57850: ; IPR001841: Zinc finger, RING-type; IPR013083: Zinc finger, RING/FYVE/PHD-type; Coil: ; SignalP-TM:	NA	Cellular regulation and signalling	other localisation
Ec-00_008590	conserved unknown protein	n/a;n/a;n/a	NA	NA	Unknown	other localisation
Ec-00_008600	hypothetical protein	n/a;n/a;n/a	NA	NA	Unknown	nd
Ec-00_008610	hypothetical protein	n/a;n/a;n/a	NA	NA	Unknown	other localisation
Ec-00_008620	hypothetical protein	n/a;n/a;n/a	NA	NA	Unknown	other localisation
Ec-00_008630	expressed unknown protein	n/a;n/a;n/a	Coil:	NA	Unknown	other localisation
Ec-00_008650	Hypothetical protein	n/a;n/a;n/a	CYTOPLASMIC_DOMAIN: Region of a membrane-bound protein predicted to be outside the membrane, in the cytoplasm.; NON_CYTOPLASMIC_DOMAIN: Region of a membrane-bound protein predicted to be outside the membrane, in the extracellular region; TMhelix: Region of a membrane-bound protein predicted to be embedded in the membrane.; TRANSMEMBRANE: Region of a membrane-bound protein predicted to be embedded…	NA	Unknown	other localisation
Ec-00_008660	Hypothetical protein	n/a;n/a;n/a	CYTOPLASMIC_DOMAIN: Region of a membrane-bound protein predicted to be outside the membrane, in the cytoplasm.; NON_CYTOPLASMIC_DOMAIN: Region of a membrane-bound protein predicted to be outside the membrane, in the extracellular region; TMhelix: Region of a membrane-bound protein predicted to be embedded in the membrane.; TRANSMEMBRANE: Region of a membrane-bound protein predicted to be embedded…	NA	Unknown	other localisation
Ec-00_008670	expressed unknown protein	n/a;n/a;n/a	CYTOPLASMIC_DOMAIN: Region of a membrane-bound protein predicted to be outside the membrane, in the cytoplasm.; NON_CYTOPLASMIC_DOMAIN: Region of a membrane-bound protein predicted to be outside the membrane, in the extracellular region; TMhelix: Region of a membrane-bound protein predicted to be embedded in the membrane.; TRANSMEMBRANE: Region of a membrane-bound protein predicted to be embedded…	NA	Unknown	signal anchor
Ec-00_008690	hypothetical protein	n/a;n/a;n/a	Coil:	NA	Unknown	other localisation
Ec-00_008700	P-loop containing nucleoside triphosphate hydrolase	GO:0000155;GO:0003924;GO:0005525;GO:0007165;n/a	PTHR23408: ; IPR005129: SIMIBI class G3E GTPase, ArgK/MeaB; SIGNAL_PEPTIDE: Signal peptide region; IPR027417: P-loop containing nucleoside triphosphate hydrolase; G3DSA:1.20.5.170: ; SIGNAL_PEPTIDE_N_REGION: N-terminal region of a signal peptide.; SignalP-TM: ; SIGNAL_PEPTIDE_C_REGION: C-terminal region of a signal peptide.; NON_CYTOPLASMIC_DOMAIN: Region of a membrane-bound protein predicted to …	NA	Metabolism	mitochondrion
Ec-00_008720	conserved unknown protein	n/a;n/a;n/a	Coil:	NA	Unknown	other localisation
Ec-00_008730	Phox homologous domain	GO:0035091	IPR001683: Phox homologous domain	NA	Membrane function and transporters	other localisation
Ec-00_008740	conserved unknown protein	n/a;n/a;n/a	NON_CYTOPLASMIC_DOMAIN: Region of a membrane-bound protein predicted to be outside the membrane, in the extracellular region; SignalP-noTM: ; SIGNAL_PEPTIDE: Signal peptide region; Coil: ; SIGNAL_PEPTIDE_N_REGION: N-terminal region of a signal peptide.; SIGNAL_PEPTIDE_H_REGION: Hydrophobic region of a signal peptide.; SignalP-TM: ; SIGNAL_PEPTIDE_C_REGION: C-terminal region of a signal peptide.	NA	Unknown	chloroplast
Ec-00_008750	expressed unknown protein	n/a;n/a;n/a	NA	NA	Unknown	other localisation
Ec-00_008760	conserved unknown protein	n/a;n/a;n/a	NA	NA	Unknown	other localisation
Ec-00_008770	expressed unknown protein	n/a;n/a;n/a	NA	NA	Unknown	other localisation
Ec-00_008780	Hypothetical protein	n/a;n/a;n/a	TMhelix: Region of a membrane-bound protein predicted to be embedded in the membrane.; SIGNAL_PEPTIDE: Signal peptide region; SIGNAL_PEPTIDE_N_REGION: N-terminal region of a signal peptide.; SIGNAL_PEPTIDE_C_REGION: C-terminal region of a signal peptide.; CYTOPLASMIC_DOMAIN: Region of a membrane-bound protein predicted to be outside the membrane, in the cytoplasm.; NON_CYTOPLASMIC_DOMAIN: Region …	NA	Unknown	signal peptide
Ec-00_008790	hypothetical protein	n/a;n/a;n/a	CYTOPLASMIC_DOMAIN: Region of a membrane-bound protein predicted to be outside the membrane, in the cytoplasm.; NON_CYTOPLASMIC_DOMAIN: Region of a membrane-bound protein predicted to be outside the membrane, in the extracellular region; TMhelix: Region of a membrane-bound protein predicted to be embedded in the membrane.; TRANSMEMBRANE: Region of a membrane-bound protein predicted to be embedded…	NA	Unknown	other localisation
Ec-00_008800	expressed unknown protein	n/a;n/a;n/a	NA	NA	Unknown	other localisation
Ec-00_008810	Sept9ps, septin GTPase, pseudogene	GO:0005525;GO:0007049	CYTOPLASMIC_DOMAIN: Region of a membrane-bound protein predicted to be outside the membrane, in the cytoplasm.; NON_CYTOPLASMIC_DOMAIN: Region of a membrane-bound protein predicted to be outside the membrane, in the extracellular region; TMhelix: Region of a membrane-bound protein predicted to be embedded in the membrane.; TRANSMEMBRANE: Region of a membrane-bound protein predicted to be embedded…	NA	Cytoskeleton and flagella	signal anchor
Ec-00_008820	Carbohydrate-binding WSC	n/a;n/a;n/a	NON_CYTOPLASMIC_DOMAIN: Region of a membrane-bound protein predicted to be outside the membrane, in the extracellular region; SignalP-noTM: ; SIGNAL_PEPTIDE: Signal peptide region; PTHR19297: ; IPR002889: Carbohydrate-binding WSC; SIGNAL_PEPTIDE_H_REGION: Hydrophobic region of a signal peptide.; SIGNAL_PEPTIDE_C_REGION: C-terminal region of a signal peptide.	NA	Cell wall and extracellular	signal peptide
Ec-00_008830	Cysteine synthase	GO:0008152;GO:0004124;GO:0055114;GO:0006535;GO:0016491	IPR001216: Cysteine synthase/cystathionine beta-synthase, pyridoxal-phosphate attachment site; IPR005859: Cysteine synthase CysK; IPR001926: Tryptophan synthase beta subunit-like PLP-dependent enzyme; IPR005856: Cysteine synthase; PTHR10314: ; G3DSA:3.40.50.1100:	KOG1252	Metabolism	other localisation
Ec-00_008840	WSC domain containing protein	NA	IPR013994: Carbohydrate-binding WSC, subgroup; PTHR19297: ; IPR002889: Carbohydrate-binding WSC	NA	Cell wall and extracellular	other localisation
Ec-00_008850	expressed unknown protein	n/a;n/a;n/a	NA	NA	Unknown	nd
Ec-00_008860	expressed unknown protein	GO:0003824;GO:0009058;GO:0030170	CYTOPLASMIC_DOMAIN: Region of a membrane-bound protein predicted to be outside the membrane, in the cytoplasm.; NON_CYTOPLASMIC_DOMAIN: Region of a membrane-bound protein predicted to be outside the membrane, in the extracellular region; TMhelix: Region of a membrane-bound protein predicted to be embedded in the membrane.; TRANSMEMBRANE: Region of a membrane-bound protein predicted to be embedded…	NA	Unknown	other localisation
Ec-00_008870	Glutathione S-transferase	n/a;GO:0005515	PTHR11571: ; IPR010987: Glutathione S-transferase, C-terminal-like; IPR004045: Glutathione S-transferase, N-terminal; IPR012336: Thioredoxin-like fold	KOG1695	Redox	other localisation
Ec-00_008880	Hypothetical protein	n/a;n/a;n/a	NA	NA	Unknown	nd
Ec-00_008890	Glutathione S-transferase	n/a;GO:0005515	PTHR11571: ; IPR010987: Glutathione S-transferase, C-terminal-like; IPR004045: Glutathione S-transferase, N-terminal; IPR012336: Thioredoxin-like fold	KOG1695	Redox	other localisation
Ec-00_008910	Regulator of chromosome condensation 1/beta-lactamase-inhibitor protein II	n/a;n/a;n/a	PTHR22870: ; IPR009091: Regulator of chromosome condensation 1/beta-lactamase-inhibitor protein II; IPR000408: Regulator of chromosome condensation, RCC1; mobidb-lite: consensus disorder prediction	NA	DNA or chromatin modification	other localisation
Ec-00_008920	hypothetical protein	n/a;n/a;n/a	CYTOPLASMIC_DOMAIN: Region of a membrane-bound protein predicted to be outside the membrane, in the cytoplasm.; NON_CYTOPLASMIC_DOMAIN: Region of a membrane-bound protein predicted to be outside the membrane, in the extracellular region; TMhelix: Region of a membrane-bound protein predicted to be embedded in the membrane.; TRANSMEMBRANE: Region of a membrane-bound protein predicted to be embedded…	NA	Unknown	other localisation
Ec-00_008930	hypothetical protein	n/a;n/a;n/a	NA	NA	Unknown	other localisation
Ec-00_008940	PC-Esterase	n/a;n/a;n/a	IPR026057: PC-Esterase	NA	Metabolism	other localisation
Ec-00_008950	Exocyst complex component Sec6	GO:0000145;GO:0006887	IPR010326: Exocyst complex component Sec6	NA	Vesicle trafficking and secretion	other localisation
Ec-00_008970	expressed unknown protein	n/a;n/a;n/a	NON_CYTOPLASMIC_DOMAIN: Region of a membrane-bound protein predicted to be outside the membrane, in the extracellular region; SIGNAL_PEPTIDE: Signal peptide region; Coil: ; SIGNAL_PEPTIDE_H_REGION: Hydrophobic region of a signal peptide.; SIGNAL_PEPTIDE_C_REGION: C-terminal region of a signal peptide.	NA	Unknown	other localisation
Ec-00_008980	Zinc finger, RING-type	GO:0005515;GO:0008270	SSF57850: ; IPR001841: Zinc finger, RING-type; IPR013083: Zinc finger, RING/FYVE/PHD-type; Coil: ; SignalP-TM:	NA	Proteolysis	other localisation
Ec-00_008990	Pectin lyase fold/virulence factor	n/a;n/a;n/a	IPR011050: Pectin lyase fold/virulence factor; IPR012334: Pectin lyase fold	NA	Cell wall and extracellular	other localisation
Ec-00_009000	probable extracellular nuclease (ISS)	n/a;n/a;n/a	CYTOPLASMIC_DOMAIN: Region of a membrane-bound protein predicted to be outside the membrane, in the cytoplasm.; NON_CYTOPLASMIC_DOMAIN: Region of a membrane-bound protein predicted to be outside the membrane, in the extracellular region; TMhelix: Region of a membrane-bound protein predicted to be embedded in the membrane.; TRANSMEMBRANE: Region of a membrane-bound protein predicted to be embedded…	NA	Proteolysis	other localisation
Ec-00_009010	hypothetical protein	n/a;n/a;n/a	NA	NA	Unknown	other localisation
Ec-00_009020	expressed unknown protein	n/a;n/a;n/a	TMhelix: Region of a membrane-bound protein predicted to be embedded in the membrane.; SIGNAL_PEPTIDE: Signal peptide region; SIGNAL_PEPTIDE_N_REGION: N-terminal region of a signal peptide.; SignalP-TM: ; SIGNAL_PEPTIDE_C_REGION: C-terminal region of a signal peptide.; NON_CYTOPLASMIC_DOMAIN: Region of a membrane-bound protein predicted to be outside the membrane, in the extracellular region; Sig…	NA	Unknown	signal peptide
Ec-00_009030	hypothetical protein	n/a;n/a;n/a	NA	NA	Unknown	other localisation
Ec-00_009040	conserved unknown protein	n/a;n/a;n/a	NA	NA	Unknown	other localisation
Ec-00_009050	expressed unknown protein	n/a;n/a;n/a	Coil:	NA	Unknown	other localisation
Ec-00_009070	conserved unknown protein	n/a;n/a;n/a	NA	NA	Unknown	other localisation
Ec-00_009080	hypothetical protein	n/a;n/a;n/a	NA	NA	Unknown	other localisation
Ec-00_009100	Thioredoxin-like fold	GO:0005515;n/a	IPR006577: UAS; G3DSA:3.10.20.90: ; PTHR23322: ; IPR029071: Ubiquitin-related domain; IPR001012: UBX domain; PTHR23322:SF1: ; Coil: ; IPR012336: Thioredoxin-like fold	NA	Redox	other localisation
Ec-00_009110	Zinc finger, DHHC-type, palmitoyltransferase	GO:0008270	CYTOPLASMIC_DOMAIN: Region of a membrane-bound protein predicted to be outside the membrane, in the cytoplasm.; IPR001594: Zinc finger, DHHC-type, palmitoyltransferase; NON_CYTOPLASMIC_DOMAIN: Region of a membrane-bound protein predicted to be outside the membrane, in the extracellular region; PTHR22883: ; TMhelix: Region of a membrane-bound protein predicted to be embedded in the membrane.; TRAN…	NA	Protein binding or modification	signal anchor
Ec-00_009120	expressed unknown protein	GO:0004190;GO:0006508	CYTOPLASMIC_DOMAIN: Region of a membrane-bound protein predicted to be outside the membrane, in the cytoplasm.; NON_CYTOPLASMIC_DOMAIN: Region of a membrane-bound protein predicted to be outside the membrane, in the extracellular region; IPR021109: Aspartic peptidase domain; TMhelix: Region of a membrane-bound protein predicted to be embedded in the membrane.; IPR001461: Aspartic peptidase; TRANS…	KOG1339	Unknown	other localisation
Ec-00_009130	hypothetical protein	n/a;n/a;n/a	SignalP-TM:	NA	Unknown	other localisation
Ec-00_009140	expressed unknown protein	n/a;n/a;n/a	NA	NA	Unknown	other localisation
Ec-00_009150	hypothetical protein	n/a;n/a;n/a	NA	NA	Unknown	other localisation
Ec-00_009160	hypothetical protein	n/a;n/a;n/a	CYTOPLASMIC_DOMAIN: Region of a membrane-bound protein predicted to be outside the membrane, in the cytoplasm.; NON_CYTOPLASMIC_DOMAIN: Region of a membrane-bound protein predicted to be outside the membrane, in the extracellular region; TMhelix: Region of a membrane-bound protein predicted to be embedded in the membrane.; TRANSMEMBRANE: Region of a membrane-bound protein predicted to be embedded…	NA	Unknown	other localisation
Ec-00_009170	hypothetical protein	n/a;n/a;n/a	NA	NA	Unknown	other localisation
Ec-00_009180	hypothetical protein	n/a;n/a;n/a	NA	NA	Unknown	other localisation
Ec-00_009190	conserved unknown protein	n/a;n/a;n/a	NA	NA	Unknown	other localisation
Ec-00_009200	Phosphate transporter	GO:0016020;GO:0006817;GO:0005315	CYTOPLASMIC_DOMAIN: Region of a membrane-bound protein predicted to be outside the membrane, in the cytoplasm.; IPR001204: Phosphate transporter; NON_CYTOPLASMIC_DOMAIN: Region of a membrane-bound protein predicted to be outside the membrane, in the extracellular region; TMhelix: Region of a membrane-bound protein predicted to be embedded in the membrane.; TRANSMEMBRANE: Region of a membrane-boun…	NA	Membrane function and transporters	signal anchor
Ec-00_009210	hypothetical protein	n/a;n/a;n/a	NA	NA	Unknown	other localisation
Ec-00_009220	conserved unknown protein	n/a;n/a;n/a	CYTOPLASMIC_DOMAIN: Region of a membrane-bound protein predicted to be outside the membrane, in the cytoplasm.; NON_CYTOPLASMIC_DOMAIN: Region of a membrane-bound protein predicted to be outside the membrane, in the extracellular region; SSF103657: ; PF16746: BAR domain of APPL family; Coil: ; TRANSMEMBRANE: Region of a membrane-bound protein predicted to be embedded in the membrane.	NA	Unknown	other localisation
Ec-00_009230	expressed unknown protein	n/a;n/a;n/a	NA	NA	Unknown	other localisation
Ec-00_009240	P-loop containing nucleoside triphosphate hydrolase	GO:0004017	IPR027417: P-loop containing nucleoside triphosphate hydrolase; PTHR21178: ; G3DSA:3.50.50.60: ; SSF51905:	NA	Metabolism	other localisation
Ec-00_009250	hypothetical protein	n/a;n/a;n/a	CYTOPLASMIC_DOMAIN: Region of a membrane-bound protein predicted to be outside the membrane, in the cytoplasm.; NON_CYTOPLASMIC_DOMAIN: Region of a membrane-bound protein predicted to be outside the membrane, in the extracellular region; TMhelix: Region of a membrane-bound protein predicted to be embedded in the membrane.; TRANSMEMBRANE: Region of a membrane-bound protein predicted to be embedded…	NA	Unknown	other localisation
Ec-00_009260	hypothetical protein	n/a;n/a;n/a	NA	NA	Unknown	other localisation
Ec-00_009270	Hypothetical protein	n/a;n/a;n/a	NA	NA	Unknown	nd
Ec-00_009280	Hypothetical protein	n/a;n/a;n/a	NA	NA	Unknown	nd
Ec-00_009290	Heat shock protein 70	NA	PTHR19375: ; IPR018181: Heat shock protein 70, conserved site; SSF53067: ; IPR029048: Heat shock protein 70kD, C-terminal domain; G3DSA:3.90.640.10: ; G3DSA:3.30.420.40: ; IPR029047: Heat shock protein 70kD, peptide-binding domain; Coil: ; IPR013126: Heat shock protein 70 family	NA	Stress response	other localisation
Ec-00_009310	Domain of unknown function DUF4033	n/a;n/a;n/a	IPR025114: Domain of unknown function DUF4033	NA	Unknown	other localisation
Ec-00_009320	telomerase reverse transcriptase catalytic subunit	n/a;n/a;n/a	SignalP-TM:	NA	RNA modification or binding	other localisation
Ec-00_009340	Membrane-associated protein	GO:0016021	CYTOPLASMIC_DOMAIN: Region of a membrane-bound protein predicted to be outside the membrane, in the cytoplasm.; NON_CYTOPLASMIC_DOMAIN: Region of a membrane-bound protein predicted to be outside the membrane, in the extracellular region; IPR008429: Cleft lip and palate transmembrane 1; TMhelix: Region of a membrane-bound protein predicted to be embedded in the membrane.; TRANSMEMBRANE: Region of …	NA	Membrane function and transporters	signal anchor
Ec-00_009350	Heat shock protein 40 like protein	NA	SSF48452: ; PTHR24078: ; PF13414: TPR repeat; IPR011990: Tetratricopeptide-like helical domain; IPR001623: DnaJ domain; IPR013026: Tetratricopeptide repeat-containing domain; Coil: ; IPR019734: Tetratricopeptide repeat; IPR018253: DnaJ domain, conserved site	NA	Stress response	other localisation
Ec-00_009355	hypothetical protein	NA	mobidb-lite: consensus disorder prediction	NA	Unknown	other localisation
Ec-00_009360	NB-ARC and TPR containing protein	GO:0005515;GO:0006952	PF13424: Tetratricopeptide repeat; SSF48452: ; IPR011990: Tetratricopeptide-like helical domain; IPR002182: NB-ARC; IPR027417: P-loop containing nucleoside triphosphate hydrolase; PR00364: Disease resistance protein signature; PTHR19959: ; Coil: ; IPR013026: Tetratricopeptide repeat-containing domain; IPR019734: Tetratricopeptide repeat	NA	Defence	other localisation
Ec-00_009370	Homeodomain-like	GO:0003677	SSF109715: ; IPR009057: Homeodomain-like; Coil: ; IPR014876: DEK, C-terminal	NA	Transcription	other localisation
Ec-00_009380	hypothetical leucine rich repeat protein	GO:0005515	G3DSA:3.80.10.10: ; SSF52058: ; IPR001611: Leucine-rich repeat	NA	Cellular regulation and signalling	other localisation
Ec-00_009390	Pectin lyase fold/virulence factor	n/a;n/a;n/a	PS51257: Prokaryotic membrane lipoprotein lipid attachment site profile.; TMhelix: Region of a membrane-bound protein predicted to be embedded in the membrane.; SIGNAL_PEPTIDE_N_REGION: N-terminal region of a signal peptide.; IPR012334: Pectin lyase fold; SignalP-TM: ; IPR011050: Pectin lyase fold/virulence factor; NON_CYTOPLASMIC_DOMAIN: Region of a membrane-bound protein predicted to be outside…	NA	Cell wall and extracellular	signal peptide
Ec-00_009410	Ferric reductase transmembrane component-like domain	GO:0005506;GO:0006118;GO:0009055;GO:0016021;GO:0016491;GO:0050660	TMhelix: Region of a membrane-bound protein predicted to be embedded in the membrane.; IPR013130: Ferric reductase transmembrane component-like domain; SSF52343: ; PTHR11972: ; CYTOPLASMIC_DOMAIN: Region of a membrane-bound protein predicted to be outside the membrane, in the cytoplasm.; NON_CYTOPLASMIC_DOMAIN: Region of a membrane-bound protein predicted to be outside the membrane, in the extrac…	NA	Membrane function and transporters	other localisation
Ec-00_009420	Ferric reductase, NAD binding	GO:0055114;GO:0016491	CYTOPLASMIC_DOMAIN: Region of a membrane-bound protein predicted to be outside the membrane, in the cytoplasm.; NON_CYTOPLASMIC_DOMAIN: Region of a membrane-bound protein predicted to be outside the membrane, in the extracellular region; G3DSA:3.40.50.80: ; IPR013121: Ferric reductase, NAD binding; TMhelix: Region of a membrane-bound protein predicted to be embedded in the membrane.; TRANSMEMBRAN…	NA	Metabolism	other localisation
Ec-00_009430	Hypothetical protein	n/a;n/a;n/a	NON_CYTOPLASMIC_DOMAIN: Region of a membrane-bound protein predicted to be outside the membrane, in the extracellular region; SIGNAL_PEPTIDE: Signal peptide region; SIGNAL_PEPTIDE_N_REGION: N-terminal region of a signal peptide.; SIGNAL_PEPTIDE_H_REGION: Hydrophobic region of a signal peptide.; SIGNAL_PEPTIDE_C_REGION: C-terminal region of a signal peptide.	NA	Unknown	nd
Ec-00_009440	Ribonuclease H-like domain	GO:0003676	IPR008906: HAT dimerisation domain, C-terminal; IPR012337: Ribonuclease H-like domain; PTHR23272: ; Coil:	NA	RNA modification or binding	mitochondrion
Ec-00_009450	Armadillo-type fold	GO:0005488	IPR016024: Armadillo-type fold	NA	Cellular regulation and signalling	other localisation
Ec-00_009460	hypothetical protein	n/a;n/a;n/a	SIGNAL_PEPTIDE: Signal peptide region; PTHR30249: ; SIGNAL_PEPTIDE_N_REGION: N-terminal region of a signal peptide.; PTHR30249:SF0: ; SignalP-TM: ; SIGNAL_PEPTIDE_C_REGION: C-terminal region of a signal peptide.; NON_CYTOPLASMIC_DOMAIN: Region of a membrane-bound protein predicted to be outside the membrane, in the extracellular region; SignalP-noTM: ; SIGNAL_PEPTIDE_H_REGION: Hydrophobic region …	NA	Unknown	other localisation
Ec-00_009480	hypothetical protein	n/a;n/a;n/a	NA	NA	Unknown	other localisation
Ec-00_009490	Pectin lyase fold	n/a;n/a;n/a	PF13229: Right handed beta helix region; SIGNAL_PEPTIDE: Signal peptide region; SIGNAL_PEPTIDE_N_REGION: N-terminal region of a signal peptide.; IPR012334: Pectin lyase fold; SIGNAL_PEPTIDE_C_REGION: C-terminal region of a signal peptide.; IPR011050: Pectin lyase fold/virulence factor; NON_CYTOPLASMIC_DOMAIN: Region of a membrane-bound protein predicted to be outside the membrane, in the extracel…	NA	Cell wall and extracellular	signal peptide
Ec-00_009500	Methyltransferase type 11	GO:0008152;GO:0008168	IPR023143: Mycolic acid cyclopropane synthase-like domain; IPR029063: S-adenosyl-L-methionine-dependent methyltransferase; IPR013216: Methyltransferase type 11; PTHR10108:	NA	Metabolism	other localisation
Ec-00_009510	expressed unknown protein	n/a;n/a;n/a	NON_CYTOPLASMIC_DOMAIN: Region of a membrane-bound protein predicted to be outside the membrane, in the extracellular region; SIGNAL_PEPTIDE: Signal peptide region; SIGNAL_PEPTIDE_N_REGION: N-terminal region of a signal peptide.; SIGNAL_PEPTIDE_H_REGION: Hydrophobic region of a signal peptide.; SignalP-TM: ; SIGNAL_PEPTIDE_C_REGION: C-terminal region of a signal peptide.	NA	Unknown	nd
Ec-00_009520	hypothetical protein	n/a;n/a;n/a	NA	NA	Unknown	other localisation
Ec-00_009530	hypothetical protein	n/a;n/a;n/a	CYTOPLASMIC_DOMAIN: Region of a membrane-bound protein predicted to be outside the membrane, in the cytoplasm.; NON_CYTOPLASMIC_DOMAIN: Region of a membrane-bound protein predicted to be outside the membrane, in the extracellular region; TMhelix: Region of a membrane-bound protein predicted to be embedded in the membrane.; Coil: ; TRANSMEMBRANE: Region of a membrane-bound protein predicted to be …	NA	Unknown	signal anchor
Ec-00_009540	expressed unknown protein	n/a;n/a;n/a	NA	NA	Unknown	mitochondrion
Ec-00_009550	Hypothetical protein	n/a;n/a;n/a	NA	NA	Unknown	nd
Ec-00_009560	expressed unknown protein	n/a;n/a;n/a	NA	NA	Unknown	other localisation
Ec-00_009580	hypothetical protein	n/a;n/a;n/a	NA	NA	Unknown	other localisation
Ec-00_009590	conserved unknown protein	n/a;n/a;n/a	NA	NA	Unknown	other localisation
Ec-00_009600	expressed unknown protein	n/a;n/a;n/a	Coil:	NA	Unknown	other localisation
Ec-00_009610	hypothetical protein	n/a;n/a;n/a	G3DSA:3.80.10.10: ; SSF52047:	NA	Unknown	other localisation
Ec-00_009620	eukaryotic initiation factor 4G	GO:0005515;GO:0016070	IPR003891: Initiation factor eIF-4 gamma, MA3; IPR003890: MIF4G-like, type 3; IPR016024: Armadillo-type fold; Coil: ; PTHR23253: ; IPR016021: MIF4-like, type 1/2/3	NA	Protein synthesis	other localisation
Ec-00_009640	conserved unknown protein	GO:0008152;GO:0008168	NA	NA	Unknown	other localisation
Ec-00_009650	Carbohydrate-binding WSC	n/a;n/a;n/a	IPR013994: Carbohydrate-binding WSC, subgroup; SIGNAL_PEPTIDE: Signal peptide region; IPR002889: Carbohydrate-binding WSC; SIGNAL_PEPTIDE_N_REGION: N-terminal region of a signal peptide.; SIGNAL_PEPTIDE_C_REGION: C-terminal region of a signal peptide.; SignalP-TM: ; NON_CYTOPLASMIC_DOMAIN: Region of a membrane-bound protein predicted to be outside the membrane, in the extracellular region; Signal…	NA	Cell wall and extracellular	signal peptide
Ec-00_009660	expressed unknown protein	n/a;n/a;n/a	NA	NA	Unknown	other localisation
Ec-00_009670	hypothetical protein	n/a;n/a;n/a	NON_CYTOPLASMIC_DOMAIN: Region of a membrane-bound protein predicted to be outside the membrane, in the extracellular region; SIGNAL_PEPTIDE: Signal peptide region; SIGNAL_PEPTIDE_N_REGION: N-terminal region of a signal peptide.; SIGNAL_PEPTIDE_H_REGION: Hydrophobic region of a signal peptide.; SIGNAL_PEPTIDE_C_REGION: C-terminal region of a signal peptide.	NA	Unknown	mitochondrion
Ec-00_009680	Rhodanese-like domain	n/a;n/a;n/a	IPR001763: Rhodanese-like domain; PTHR13297:	NA	Metabolism	other localisation
Ec-00_009690	hypothetical protein	n/a;n/a;n/a	NA	NA	Unknown	other localisation
Ec-00_009700	exonuclease I Exo1	GO:0004518;GO:0006281	TMhelix: Region of a membrane-bound protein predicted to be embedded in the membrane.	NA	DNA or chromatin modification	other localisation
Ec-00_009710	Carbohydrate-binding WSC	n/a;n/a;n/a	IPR013994: Carbohydrate-binding WSC, subgroup; SIGNAL_PEPTIDE: Signal peptide region; IPR002889: Carbohydrate-binding WSC; SIGNAL_PEPTIDE_N_REGION: N-terminal region of a signal peptide.; SIGNAL_PEPTIDE_C_REGION: C-terminal region of a signal peptide.; SignalP-TM: ; NON_CYTOPLASMIC_DOMAIN: Region of a membrane-bound protein predicted to be outside the membrane, in the extracellular region; Signal…	NA	Cell wall and extracellular	signal peptide
Ec-00_009720	expressed unknown protein	n/a;n/a;n/a	NA	NA	Unknown	nd
Ec-00_009730	Hypothetical protein	n/a;n/a;n/a	NA	NA	Unknown	other localisation
Ec-00_009740	Zinc finger, CCHC-type	GO:0003676;GO:0008270	NON_CYTOPLASMIC_DOMAIN: Region of a membrane-bound protein predicted to be outside the membrane, in the extracellular region; SIGNAL_PEPTIDE: Signal peptide region; IPR001878: Zinc finger, CCHC-type; SIGNAL_PEPTIDE_N_REGION: N-terminal region of a signal peptide.; SIGNAL_PEPTIDE_H_REGION: Hydrophobic region of a signal peptide.; SIGNAL_PEPTIDE_C_REGION: C-terminal region of a signal peptide.	NA	Cellular regulation and signalling	other localisation
Ec-00_009750	cupin-like protein	GO:0030145	SIGNAL_PEPTIDE: Signal peptide region; IPR006045: Cupin 1; SIGNAL_PEPTIDE_N_REGION: N-terminal region of a signal peptide.; SignalP-TM: ; SIGNAL_PEPTIDE_C_REGION: C-terminal region of a signal peptide.; PTHR31238: ; NON_CYTOPLASMIC_DOMAIN: Region of a membrane-bound protein predicted to be outside the membrane, in the extracellular region; IPR011051: RmlC-like cupin domain; SignalP-noTM: ; IPR001…	NA	Unknown	signal peptide
Ec-00_009760	conserved unknown protein	n/a;n/a;n/a	NA	NA	Unknown	other localisation
Ec-00_009770	hypothetical protein	n/a;n/a;n/a	Coil: ; SignalP-TM:	NA	Unknown	other localisation
Ec-00_009780	Hypothetical protein	n/a;n/a;n/a	NA	NA	Unknown	other localisation
Ec-00_009800	expressed unknown protein	n/a;n/a;n/a	NA	NA	Unknown	other localisation
Ec-00_009810	expressed unknown protein	n/a;n/a;n/a	NA	NA	Unknown	other localisation
Ec-00_009830	Hypothetical protein	n/a;n/a;n/a	NA	NA	Unknown	other localisation
Ec-00_009840	hypothetical protein	n/a;n/a;n/a	CYTOPLASMIC_DOMAIN: Region of a membrane-bound protein predicted to be outside the membrane, in the cytoplasm.; NON_CYTOPLASMIC_DOMAIN: Region of a membrane-bound protein predicted to be outside the membrane, in the extracellular region; TMhelix: Region of a membrane-bound protein predicted to be embedded in the membrane.; Coil: ; TRANSMEMBRANE: Region of a membrane-bound protein predicted to be …	NA	Unknown	signal anchor
Ec-00_009850	PC-Esterase	n/a;n/a;n/a	CYTOPLASMIC_DOMAIN: Region of a membrane-bound protein predicted to be outside the membrane, in the cytoplasm.; IPR026057: PC-Esterase; NON_CYTOPLASMIC_DOMAIN: Region of a membrane-bound protein predicted to be outside the membrane, in the extracellular region; Coil: ; TRANSMEMBRANE: Region of a membrane-bound protein predicted to be embedded in the membrane.	NA	Metabolism	other localisation
Ec-00_009860	DNA binding HTH domain, Psq-type	GO:0003677	IPR009057: Homeodomain-like; IPR007889: DNA binding HTH domain, Psq-type	NA	DNA or chromatin modification	other localisation
Ec-00_009870	expressed unknown protein	n/a;n/a;n/a	NA	NA	Unknown	other localisation
Ec-00_009880	hypothetical protein	n/a;n/a;n/a	Coil:	NA	Unknown	other localisation
Ec-00_009890	Mpv17/PMP22	GO:0016021	IPR007248: Mpv17/PMP22; TMhelix: Region of a membrane-bound protein predicted to be embedded in the membrane.; SIGNAL_PEPTIDE: Signal peptide region; PS51257: Prokaryotic membrane lipoprotein lipid attachment site profile.; SIGNAL_PEPTIDE_N_REGION: N-terminal region of a signal peptide.; SignalP-TM: ; SIGNAL_PEPTIDE_C_REGION: C-terminal region of a signal peptide.; CYTOPLASMIC_DOMAIN: Region of a…	NA	Membrane function and transporters	chloroplast
Ec-00_009900	Peptidase S8/S53 domain	GO:0004252;GO:0006508	SIGNAL_PEPTIDE: Signal peptide region; IPR000209: Peptidase S8/S53 domain; SIGNAL_PEPTIDE_N_REGION: N-terminal region of a signal peptide.; SIGNAL_PEPTIDE_C_REGION: C-terminal region of a signal peptide.; SignalP-TM: ; NON_CYTOPLASMIC_DOMAIN: Region of a membrane-bound protein predicted to be outside the membrane, in the extracellular region; SignalP-noTM: ; SIGNAL_PEPTIDE_H_REGION: Hydrophobic r…	NA	Proteolysis	chloroplast
Ec-00_009910	hypothetical protein	n/a;n/a;n/a	NA	NA	Unknown	other localisation
Ec-00_009920	hypothetical protein	n/a;n/a;n/a	NA	NA	Unknown	other localisation
Ec-00_009930	Regulator of chromosome condensation, RCC1	n/a;n/a;n/a	PTHR22870: ; IPR009091: Regulator of chromosome condensation 1/beta-lactamase-inhibitor protein II; IPR000408: Regulator of chromosome condensation, RCC1	NA	DNA or chromatin modification	other localisation
Ec-00_009940	Six-bladed beta-propeller, TolB-like	GO:0009058;GO:0016844	SIGNAL_PEPTIDE: Signal peptide region; SIGNAL_PEPTIDE_N_REGION: N-terminal region of a signal peptide.; IPR011042: Six-bladed beta-propeller, TolB-like; SIGNAL_PEPTIDE_C_REGION: C-terminal region of a signal peptide.; NON_CYTOPLASMIC_DOMAIN: Region of a membrane-bound protein predicted to be outside the membrane, in the extracellular region; PTHR10426: ; SignalP-noTM: ; SSF63829: ; SIGNAL_PEPTIDE…	NA	Unknown	signal peptide
Ec-00_009950	WD40/YVTN repeat-like-containing domain	GO:0005515	PTHR16453: ; IPR017986: WD40-repeat-containing domain; IPR015943: WD40/YVTN repeat-like-containing domain	NA	Protein binding or modification	other localisation
Ec-00_009970	hypothetical protein	GO:0031177	NA	NA	Unknown	other localisation
Ec-00_009980	hypothetical protein	n/a;n/a;n/a	NA	NA	Unknown	other localisation
Ec-00_009990	Hypothetical protein	n/a;n/a;n/a	NON_CYTOPLASMIC_DOMAIN: Region of a membrane-bound protein predicted to be outside the membrane, in the extracellular region; TMhelix: Region of a membrane-bound protein predicted to be embedded in the membrane.; SIGNAL_PEPTIDE: Signal peptide region; SIGNAL_PEPTIDE_N_REGION: N-terminal region of a signal peptide.; SIGNAL_PEPTIDE_H_REGION: Hydrophobic region of a signal peptide.; SignalP-TM: ; SI…	NA	Unknown	nd
Ec-00_010010	Uridyltransferase	NA	SSF81631: ; IPR002058: PAP/25A-associated; PTHR12271: ; G3DSA:3.30.460.10: ; SSF81301:	NA	Metabolism	other localisation
Ec-00_010020	expressed unknown protein	n/a;n/a;n/a	NA	NA	Unknown	other localisation
Ec-00_010030	Catalase decomposes hydrogen peroxide to molecular oxygen and water.	GO:0020037;GO:0055114;GO:0006979;GO:0004096;GO:0004601	TMhelix: Region of a membrane-bound protein predicted to be embedded in the membrane.; PS51257: Prokaryotic membrane lipoprotein lipid attachment site profile.; SIGNAL_PEPTIDE_N_REGION: N-terminal region of a signal peptide.; SignalP-TM: ; NON_CYTOPLASMIC_DOMAIN: Region of a membrane-bound protein predicted to be outside the membrane, in the extracellular region; IPR000763: Catalase-peroxidase ha…	NA	Redox	signal peptide
Ec-00_010040	Notch domain	GO:0016020;GO:0030154	NA	NA	Cellular regulation and signalling	other localisation
Ec-00_010050	hypothetical protein	n/a;n/a;n/a	NA	NA	Unknown	other localisation
Ec-00_010060	hypothetical protein	GO:0008270	SignalP-TM:	NA	Unknown	other localisation
Ec-00_010070	hypothetical protein	n/a;n/a;n/a	Coil:	NA	Unknown	other localisation
Ec-00_010080	conserved unknown protein	n/a;n/a;n/a	NA	NA	Unknown	nd
Ec-00_010090	Hypothetical protein	n/a;n/a;n/a	NA	NA	Unknown	other localisation
Ec-00_010100	expressed unknown protein	n/a;n/a;n/a	CYTOPLASMIC_DOMAIN: Region of a membrane-bound protein predicted to be outside the membrane, in the cytoplasm.; NON_CYTOPLASMIC_DOMAIN: Region of a membrane-bound protein predicted to be outside the membrane, in the extracellular region; TMhelix: Region of a membrane-bound protein predicted to be embedded in the membrane.; TRANSMEMBRANE: Region of a membrane-bound protein predicted to be embedded…	NA	Unknown	other localisation
Ec-00_010110	Protein kinase-like domain	GO:0016772	IPR000719: Protein kinase domain; IPR002290: Serine/threonine/dual specificity protein kinase, catalytic domain; G3DSA:3.30.200.20: ; G3DSA:1.10.510.10: ; PTHR24362: ; IPR011009: Protein kinase-like domain; IPR008271: Serine/threonine-protein kinase, active site	NA	Cellular regulation and signalling	other localisation
Ec-00_010120	hypothetical protein	n/a;n/a;n/a	NA	NA	Unknown	mitochondrion
Ec-00_010130	hypothetical protein	n/a;n/a;n/a	NA	NA	Unknown	other localisation
Ec-00_010140	expressed unknown protein	n/a;n/a;n/a	NA	NA	Unknown	nd
Ec-00_010150	expressed unknown protein	n/a;n/a;n/a	NA	NA	Unknown	other localisation
Ec-00_010160	Phytochrome-like protein 3	GO:0016310;GO:0016772	IPR013515: Phytochrome, central region; PTHR24423: ; IPR005467: Histidine kinase domain; IPR016132: Phytochrome chromophore attachment domain; IPR003594: Histidine kinase-like ATPase, C-terminal domain; IPR011006: CheY-like superfamily; IPR029016: GAF domain-like; IPR001789: Signal transduction response regulator, receiver domain; G3DSA:3.40.50.2300: ; IPR003661: Signal transduction histidine kin…	NA	Cellular regulation and signalling	other localisation
Ec-00_010170	Trehalase C-terminal fragment, family GH37	GO:0003824	IPR001661: Glycoside hydrolase, family 37; IPR008928: Six-hairpin glycosidase-like	KOG0602	Metabolism	other localisation
Ec-00_010180	hypothetical protein	n/a;n/a;n/a	NA	NA	Unknown	other localisation
Ec-00_010190	hypothetical protein	n/a;n/a;n/a	NA	NA	Unknown	other localisation
Ec-00_010200	Fatty acid desaturase, type 1	GO:0006629	CYTOPLASMIC_DOMAIN: Region of a membrane-bound protein predicted to be outside the membrane, in the cytoplasm.; IPR018506: Cytochrome b5, heme-binding site; NON_CYTOPLASMIC_DOMAIN: Region of a membrane-bound protein predicted to be outside the membrane, in the extracellular region; IPR005804: Fatty acid desaturase, type 1; TMhelix: Region of a membrane-bound protein predicted to be embedded in th…	NA	Metabolism	other localisation
Ec-00_010210	conserved unknown protein	n/a;n/a;n/a	IPR013994: Carbohydrate-binding WSC, subgroup; IPR002889: Carbohydrate-binding WSC	NA	Unknown	other localisation
Ec-00_010220	expressed unknown protein	n/a;n/a;n/a	Coil:	NA	Unknown	other localisation
Ec-00_010230	hypothetical protein	n/a;n/a;n/a	Coil:	NA	Unknown	other localisation
Ec-00_010240	Peptidase C19, ubiquitin carboxyl-terminal hydrolase	GO:0036459;GO:0006511	G3DSA:2.20.210.10: ; IPR018200: Ubiquitin specific protease, conserved site; SSF54001: ; IPR001394: Peptidase C19, ubiquitin carboxyl-terminal hydrolase; IPR028889: Ubiquitin specific protease domain; PTHR24006:	NA	Proteolysis	other localisation
Ec-00_010250	hypothetical protein	n/a;n/a;n/a	NA	NA	Unknown	other localisation
Ec-00_010260	hypothetical protein	n/a;n/a;n/a	SIGNAL_PEPTIDE: Signal peptide region; TMhelix: Region of a membrane-bound protein predicted to be embedded in the membrane.; SIGNAL_PEPTIDE_N_REGION: N-terminal region of a signal peptide.; SIGNAL_PEPTIDE_C_REGION: C-terminal region of a signal peptide.; SignalP-TM: ; NON_CYTOPLASMIC_DOMAIN: Region of a membrane-bound protein predicted to be outside the membrane, in the extracellular region; Sig…	NA	Unknown	signal peptide
Ec-00_010280	Hypothetical protein	n/a;n/a;n/a	NA	NA	Unknown	other localisation
Ec-00_010290	Hypothetical protein	n/a;n/a;n/a	NA	NA	Unknown	nd
Ec-00_010310	Acyl carrier protein-like	GO:0008152;GO:0003824	G3DSA:3.40.50.980: ; IPR014030: Beta-ketoacyl synthase, N-terminal; IPR000873: AMP-dependent synthetase/ligase; G3DSA:2.30.38.10: ; IPR016038: Thiolase-like, subgroup; IPR020806: Polyketide synthase, phosphopantetheine-binding domain; G3DSA:3.30.300.30: ; PTHR22754: ; IPR009081: Acyl carrier protein-like; SSF56801:	NA	Metabolism	other localisation
Ec-00_010320	Hypothetical protein	n/a;n/a;n/a	NA	NA	Unknown	other localisation
Ec-00_010330	Hypothetical protein	n/a;n/a;n/a	NON_CYTOPLASMIC_DOMAIN: Region of a membrane-bound protein predicted to be outside the membrane, in the extracellular region; SignalP-noTM: ; SIGNAL_PEPTIDE: Signal peptide region; SIGNAL_PEPTIDE_N_REGION: N-terminal region of a signal peptide.; SIGNAL_PEPTIDE_H_REGION: Hydrophobic region of a signal peptide.; SignalP-TM: ; SIGNAL_PEPTIDE_C_REGION: C-terminal region of a signal peptide.	NA	Unknown	signal peptide
Ec-00_010350	Hypothetical protein	n/a;n/a;n/a	NA	NA	Unknown	nd
Ec-00_010370	Hypothetical protein	n/a;n/a;n/a	NA	NA	Unknown	other localisation
Ec-00_010380	expressed unknown protein	GO:0004871;GO:0007165	IPR000014: PAS domain	NA	Unknown	other localisation
Ec-00_010390	PR1-like metalloprotease	NA	G3DSA:2.10.25.10: ; IPR013994: Carbohydrate-binding WSC, subgroup; IPR024079: Metallopeptidase, catalytic domain; PTHR19297: ; IPR002889: Carbohydrate-binding WSC; IPR000742: EGF-like domain; PR01217: Proline rich extensin signature; SSF57196: ; IPR014044: CAP domain; IPR013032: EGF-like, conserved site; SSF55486:	NA	Defence	other localisation
Ec-00_010400	expressed unknown protein	n/a;n/a;n/a	CYTOPLASMIC_DOMAIN: Region of a membrane-bound protein predicted to be outside the membrane, in the cytoplasm.; NON_CYTOPLASMIC_DOMAIN: Region of a membrane-bound protein predicted to be outside the membrane, in the extracellular region; TMhelix: Region of a membrane-bound protein predicted to be embedded in the membrane.; TRANSMEMBRANE: Region of a membrane-bound protein predicted to be embedded…	NA	Unknown	other localisation
Ec-00_010410	hypothetical protein	n/a;n/a;n/a	SignalP-TM:	NA	Unknown	other localisation
Ec-00_010420	Protein kinase-like domain	GO:0016772	PTHR22983: ; IPR017441: Protein kinase, ATP binding site; IPR000719: Protein kinase domain; G3DSA:3.30.200.20: ; IPR008266: Tyrosine-protein kinase, active site; G3DSA:1.10.510.10: ; IPR011009: Protein kinase-like domain	NA	Cellular regulation and signalling	other localisation
Ec-00_010430	conserved unknown protein	n/a;n/a;n/a	NA	NA	Unknown	other localisation
Ec-00_010440	hypothetical protein	n/a;n/a;n/a	CYTOPLASMIC_DOMAIN: Region of a membrane-bound protein predicted to be outside the membrane, in the cytoplasm.; NON_CYTOPLASMIC_DOMAIN: Region of a membrane-bound protein predicted to be outside the membrane, in the extracellular region; TRANSMEMBRANE: Region of a membrane-bound protein predicted to be embedded in the membrane.	NA	Unknown	other localisation
Ec-00_010450	expressed unknown protein	n/a;n/a;n/a	Coil:	NA	Unknown	other localisation
Ec-00_010460	expressed unknown protein	GO:0005549;GO:0006810	NA	NA	Unknown	other localisation
Ec-00_010470	peptidase-like	GO:0003777;GO:0005871	PF13424: Tetratricopeptide repeat; IPR002151: Kinesin light chain; PTHR19959: ; IPR011990: Tetratricopeptide-like helical domain; IPR013026: Tetratricopeptide repeat-containing domain; IPR019734: Tetratricopeptide repeat	NA	Proteolysis	other localisation
Ec-00_010480	Hypothetical protein	n/a;n/a;n/a	NA	NA	Unknown	other localisation
Ec-00_010490	hypothetical protein	n/a;n/a;n/a	Coil:	NA	Unknown	other localisation
Ec-00_010500	hypothetical protein	n/a;n/a;n/a	NA	NA	Unknown	other localisation
Ec-00_010510	Fungal lipase-like domain	GO:0006629	IPR002921: Fungal lipase-like domain; IPR029058: Alpha/Beta hydrolase fold	NA	Metabolism	other localisation
Ec-00_010520	BSD	n/a;n/a;n/a	SSF140383: ; IPR005607: BSD; Coil:	NA	Unknown	other localisation
Ec-00_010530	Hypothetical protein	n/a;n/a;n/a	CYTOPLASMIC_DOMAIN: Region of a membrane-bound protein predicted to be outside the membrane, in the cytoplasm.; NON_CYTOPLASMIC_DOMAIN: Region of a membrane-bound protein predicted to be outside the membrane, in the extracellular region; TMhelix: Region of a membrane-bound protein predicted to be embedded in the membrane.; TRANSMEMBRANE: Region of a membrane-bound protein predicted to be embedded…	NA	Unknown	signal anchor
Ec-00_010540	conserved unknown protein	n/a;n/a;n/a	IPR001849: Pleckstrin homology domain	NA	Unknown	other localisation
Ec-00_010550	Hypothetical protein	n/a;n/a;n/a	NA	NA	Unknown	other localisation
Ec-00_010560	Adenosine/AMP deaminase domain	GO:0019239	IPR001365: Adenosine/AMP deaminase domain; PTHR11409: ; SSF51556: ; G3DSA:3.20.20.140:	NA	Metabolism	other localisation
Ec-00_010570	Ribosomal protein S6e	GO:0005840;GO:0005622;GO:0006412;GO:0003735	IPR001377: Ribosomal protein S6e; IPR014401: Ribosomal protein S6, eukaryotic; Coil: ; IPR018282: Ribosomal protein S6e, conserved site	NA	Protein synthesis	other localisation
Ec-00_010580	hypothetical protein	n/a;n/a;n/a	Coil:	NA	Unknown	other localisation
Ec-00_010590	expressed unknown protein	n/a;n/a;n/a	NA	NA	Unknown	nd
Ec-00_010600	S-adenosyl-L-methionine-dependent methyltransferase	n/a;n/a;n/a	CYTOPLASMIC_DOMAIN: Region of a membrane-bound protein predicted to be outside the membrane, in the cytoplasm.; NON_CYTOPLASMIC_DOMAIN: Region of a membrane-bound protein predicted to be outside the membrane, in the extracellular region; IPR029063: S-adenosyl-L-methionine-dependent methyltransferase; TRANSMEMBRANE: Region of a membrane-bound protein predicted to be embedded in the membrane.	NA	Metabolism	signal anchor
Ec-00_010610	hypothetical protein	n/a;n/a;n/a	NA	NA	Unknown	other localisation
Ec-00_010620	hypothetical protein	GO:0031072	NA	NA	Unknown	other localisation
Ec-00_010630	hypothetical protein	n/a;n/a;n/a	CYTOPLASMIC_DOMAIN: Region of a membrane-bound protein predicted to be outside the membrane, in the cytoplasm.; NON_CYTOPLASMIC_DOMAIN: Region of a membrane-bound protein predicted to be outside the membrane, in the extracellular region; TMhelix: Region of a membrane-bound protein predicted to be embedded in the membrane.; TRANSMEMBRANE: Region of a membrane-bound protein predicted to be embedded…	NA	Unknown	other localisation
Ec-00_010640	hypothetical protein	n/a;n/a;n/a	Coil:	NA	Unknown	other localisation
Ec-00_010650	Hypothetical protein	n/a;n/a;n/a	NON_CYTOPLASMIC_DOMAIN: Region of a membrane-bound protein predicted to be outside the membrane, in the extracellular region; SignalP-noTM: ; SIGNAL_PEPTIDE: Signal peptide region; SIGNAL_PEPTIDE_N_REGION: N-terminal region of a signal peptide.; SIGNAL_PEPTIDE_H_REGION: Hydrophobic region of a signal peptide.; SIGNAL_PEPTIDE_C_REGION: C-terminal region of a signal peptide.; SignalP-TM:	NA	Unknown	signal peptide
Ec-00_010660	conserved unknown protein	n/a;n/a;n/a	CYTOPLASMIC_DOMAIN: Region of a membrane-bound protein predicted to be outside the membrane, in the cytoplasm.; NON_CYTOPLASMIC_DOMAIN: Region of a membrane-bound protein predicted to be outside the membrane, in the extracellular region; TMhelix: Region of a membrane-bound protein predicted to be embedded in the membrane.; TRANSMEMBRANE: Region of a membrane-bound protein predicted to be embedded…	NA	Unknown	other localisation
Ec-00_010670	hypothetical protein	n/a;n/a;n/a	NA	NA	Unknown	other localisation
Ec-00_010690	protein kinase, TKL group	GO:0004674;GO:0006468;n/a	Coil:	NA	Cellular regulation and signalling	other localisation
Ec-00_010700	ammonium transporter	GO:0006810;GO:0008519;GO:0016020	TMhelix: Region of a membrane-bound protein predicted to be embedded in the membrane.; IPR001905: Ammonium transporter; CYTOPLASMIC_DOMAIN: Region of a membrane-bound protein predicted to be outside the membrane, in the cytoplasm.; NON_CYTOPLASMIC_DOMAIN: Region of a membrane-bound protein predicted to be outside the membrane, in the extracellular region; IPR018047: Ammonium transporter, conserve…	NA	Membrane function and transporters	other localisation
Ec-00_010710	hypothetical protein	n/a;n/a;n/a	NA	NA	Unknown	other localisation
Ec-00_010720	Protein kinase-like domain	GO:0005515;GO:0016772	IPR017441: Protein kinase, ATP binding site; IPR011990: Tetratricopeptide-like helical domain; IPR002290: Serine/threonine/dual specificity protein kinase, catalytic domain; PF13374: Tetratricopeptide repeat; SIGNAL_PEPTIDE_N_REGION: N-terminal region of a signal peptide.; IPR008271: Serine/threonine-protein kinase, active site; IPR011009: Protein kinase-like domain; PTHR23257: ; NON_CYTOPLASMIC_…	NA	Cellular regulation and signalling	other localisation
Ec-00_010730	expressed unknown protein	n/a;n/a;n/a	NA	NA	Unknown	other localisation
Ec-00_010740	EsV-1-166	n/a;n/a;n/a	NON_CYTOPLASMIC_DOMAIN: Region of a membrane-bound protein predicted to be outside the membrane, in the extracellular region; SIGNAL_PEPTIDE: Signal peptide region; SignalP-noTM: ; SIGNAL_PEPTIDE_N_REGION: N-terminal region of a signal peptide.; SIGNAL_PEPTIDE_H_REGION: Hydrophobic region of a signal peptide.; SIGNAL_PEPTIDE_C_REGION: C-terminal region of a signal peptide.	NA	Cell wall and extracellular	signal peptide
Ec-00_010750	Hypothetical protein	n/a;n/a;n/a	NA	NA	Unknown	nd
Ec-00_010760	Peptidase C19, ubiquitin carboxyl-terminal hydrolase	GO:0036459;GO:0006511	IPR018200: Ubiquitin specific protease, conserved site; SSF54001: ; IPR001394: Peptidase C19, ubiquitin carboxyl-terminal hydrolase; IPR028889: Ubiquitin specific protease domain; PTHR24006:	NA	Proteolysis	other localisation
Ec-00_010770	Protein N-terminal glutamine amidohydrolase, alpha beta roll	GO:0016811	IPR023128: Protein N-terminal glutamine amidohydrolase, alpha beta roll; PTHR13035:	NA	Protein binding or modification	other localisation
Ec-00_010780	Tetratricopeptide-like helical domain	GO:0005515	SSF48452: ; PF13424: Tetratricopeptide repeat; IPR002151: Kinesin light chain; PTHR19959: ; IPR011990: Tetratricopeptide-like helical domain; IPR013026: Tetratricopeptide repeat-containing domain; IPR019734: Tetratricopeptide repeat	NA	Protein binding or modification	other localisation
Ec-00_010800	Mannuronan C-5-epimerase	n/a;n/a;n/a	IPR013994: Carbohydrate-binding WSC, subgroup; PTHR19297: ; IPR002889: Carbohydrate-binding WSC; IPR012334: Pectin lyase fold; CYTOPLASMIC_DOMAIN: Region of a membrane-bound protein predicted to be outside the membrane, in the cytoplasm.; IPR011050: Pectin lyase fold/virulence factor; NON_CYTOPLASMIC_DOMAIN: Region of a membrane-bound protein predicted to be outside the membrane, in the extracell…	NA	Cell wall and extracellular	other localisation
Ec-00_010810	hypothetical protein	n/a;n/a;n/a	NA	NA	Unknown	other localisation
Ec-00_010820	Hypothetical protein	n/a;n/a;n/a	CYTOPLASMIC_DOMAIN: Region of a membrane-bound protein predicted to be outside the membrane, in the cytoplasm.; NON_CYTOPLASMIC_DOMAIN: Region of a membrane-bound protein predicted to be outside the membrane, in the extracellular region; TMhelix: Region of a membrane-bound protein predicted to be embedded in the membrane.; TRANSMEMBRANE: Region of a membrane-bound protein predicted to be embedded…	NA	Unknown	other localisation
Ec-00_010830	Glutathione reductase	GO:0050660;GO:0055114;GO:0016491	PR00368: FAD-dependent pyridine nucleotide reductase signature; IPR004099: Pyridine nucleotide-disulphide oxidoreductase, dimerisation domain; PTHR22912: ; PR00411: Pyridine nucleotide disulphide reductase class-I signature; IPR016156: FAD/NAD-linked reductase, dimerisation domain; IPR001327: Pyridine nucleotide-disulphide oxidoreductase, NAD-binding domain; G3DSA:3.50.50.60: ; IPR023753: Pyridin…	KOG0405	Redox	other localisation
Ec-00_010850	hypothetical protein	n/a;n/a;n/a	NA	NA	Unknown	other localisation
Ec-00_010860	hypothetical protein	n/a;n/a;n/a	NA	NA	Unknown	other localisation
Ec-00_010870	hypothetical protein	n/a;n/a;n/a	NA	NA	Unknown	other localisation
Ec-00_010880	RmlC-like jelly roll fold	n/a;n/a;n/a	PTHR11635: ; IPR000595: Cyclic nucleotide-binding domain; IPR018488: Cyclic nucleotide-binding, conserved site; IPR012198: cAMP-dependent protein kinase regulatory subunit; IPR002373: cAMP/cGMP-dependent protein kinase; IPR018490: Cyclic nucleotide-binding-like; IPR003117: Dimerization-anchoring domain of cAMP-dependent protein kinase, regulatory subunit; IPR014710: RmlC-like jelly roll fold	NA	Metabolism	other localisation
Ec-00_010890	conserved unknown protein	n/a;n/a;n/a	G3DSA:3.90.1410.10: ; TMhelix: Region of a membrane-bound protein predicted to be embedded in the membrane.; SIGNAL_PEPTIDE: Signal peptide region; PS51257: Prokaryotic membrane lipoprotein lipid attachment site profile.; PTHR13271: ; SIGNAL_PEPTIDE_N_REGION: N-terminal region of a signal peptide.; SSF82199: ; SIGNAL_PEPTIDE_C_REGION: C-terminal region of a signal peptide.; NON_CYTOPLASMIC_DOMAIN…	NA	Unknown	signal peptide
Ec-00_010900	hypothetical protein	n/a;n/a;n/a	NA	NA	Unknown	other localisation
Ec-00_010910	Molybdenum cofactor biosynthesis, MoeB	GO:0003824;GO:0005488;GO:0008152	IPR009036: Molybdenum cofactor biosynthesis, MoeB; IPR016040: NAD(P)-binding domain; G3DSA:3.50.50.60:	NA	Metabolism	other localisation
Ec-00_010920	Ubiquitin-related domain	n/a;n/a;n/a	G3DSA:3.10.20.90: ; IPR029071: Ubiquitin-related domain; IPR022617: Rad60/SUMO-like domain	NA	Proteolysis	other localisation
Ec-00_010930	Quinonprotein alcohol dehydrogenase-like superfamily	n/a;n/a;n/a	PTHR22847: ; IPR017986: WD40-repeat-containing domain; IPR001680: WD40 repeat; IPR015943: WD40/YVTN repeat-like-containing domain; IPR011047: Quinonprotein alcohol dehydrogenase-like superfamily	NA	Metabolism	other localisation
Ec-00_010940	Kelch-type beta propeller	GO:0005515	IPR011043: Galactose oxidase/kelch, beta-propeller; PF13418: Galactose oxidase, central domain; Coil: ; IPR015915: Kelch-type beta propeller; PF13415: Galactose oxidase, central domain; PTHR23244: ; SignalP-TM:	NA	Metabolism	mitochondrion
Ec-00_010950	Bromodomain	GO:0005515	PTHR22880: ; IPR013083: Zinc finger, RING/FYVE/PHD-type; IPR011011: Zinc finger, FYVE/PHD-type; IPR001487: Bromodomain	NA	Cellular regulation and signalling	other localisation
Ec-00_010960	similar to transmembrane protein 97	n/a;n/a;n/a	SIGNAL_PEPTIDE: Signal peptide region; TMhelix: Region of a membrane-bound protein predicted to be embedded in the membrane.; PTHR31204: ; SIGNAL_PEPTIDE_N_REGION: N-terminal region of a signal peptide.; IPR016964: Transmembrane protein 6/97; SIGNAL_PEPTIDE_C_REGION: C-terminal region of a signal peptide.; CYTOPLASMIC_DOMAIN: Region of a membrane-bound protein predicted to be outside the membrane…	NA	Membrane function and transporters	signal peptide
Ec-00_010970	Hypothetical protein	n/a;n/a;n/a	NA	NA	Unknown	other localisation
Ec-00_010980	Cycloartenol synthase	GO:0003824;n/a	IPR002365: Terpene synthase, conserved site; IPR008930: Terpenoid cyclases/protein prenyltransferase alpha-alpha toroid; PTHR11764: ; PF13249: Prenyltransferase-like	NA	Metabolism	other localisation
Ec-00_010990	RmlC-like jelly roll fold	n/a;n/a;n/a	IPR000595: Cyclic nucleotide-binding domain; SIGNAL_PEPTIDE: Signal peptide region; SIGNAL_PEPTIDE_N_REGION: N-terminal region of a signal peptide.; SIGNAL_PEPTIDE_C_REGION: C-terminal region of a signal peptide.; NON_CYTOPLASMIC_DOMAIN: Region of a membrane-bound protein predicted to be outside the membrane, in the extracellular region; IPR018490: Cyclic nucleotide-binding-like; SIGNAL_PEPTIDE_H…	NA	Metabolism	other localisation
Ec-00_011010	conserved unknown protein	n/a;n/a;n/a	CYTOPLASMIC_DOMAIN: Region of a membrane-bound protein predicted to be outside the membrane, in the cytoplasm.; NON_CYTOPLASMIC_DOMAIN: Region of a membrane-bound protein predicted to be outside the membrane, in the extracellular region; TMhelix: Region of a membrane-bound protein predicted to be embedded in the membrane.; TRANSMEMBRANE: Region of a membrane-bound protein predicted to be embedded…	NA	Unknown	signal anchor
Ec-00_011020	Hypothetical protein	n/a;n/a;n/a	NA	NA	Unknown	other localisation
Ec-00_011040	Hypothetical protein	n/a;n/a;n/a	NA	NA	Unknown	other localisation
Ec-00_011050	WD40/YVTN repeat-like-containing domain	GO:0005515	PTHR22847: ; IPR019775: WD40 repeat, conserved site; IPR017986: WD40-repeat-containing domain; IPR001680: WD40 repeat; IPR015943: WD40/YVTN repeat-like-containing domain; IPR011047: Quinonprotein alcohol dehydrogenase-like superfamily	NA	Protein binding or modification	other localisation
Ec-00_011060	expressed unknown protein	n/a;n/a;n/a	NA	NA	Unknown	other localisation
Ec-00_011070	expressed unknown protein	n/a;n/a;n/a	Coil:	NA	Unknown	other localisation
Ec-00_011080	Dynein heavy chain family	n/a;n/a;n/a	PTHR10676:SF262: ; IPR013594: Dynein heavy chain, domain-1; Coil: ; IPR026983: Dynein heavy chain	NA	Cytoskeleton and flagella	other localisation
Ec-00_011090	expressed unknown protein	n/a;n/a;n/a	NA	NA	Unknown	other localisation
Ec-00_011100	expressed unknown protein	n/a;n/a;n/a	TMhelix: Region of a membrane-bound protein predicted to be embedded in the membrane.; SIGNAL_PEPTIDE: Signal peptide region; SIGNAL_PEPTIDE_N_REGION: N-terminal region of a signal peptide.; SIGNAL_PEPTIDE_C_REGION: C-terminal region of a signal peptide.; CYTOPLASMIC_DOMAIN: Region of a membrane-bound protein predicted to be outside the membrane, in the cytoplasm.; NON_CYTOPLASMIC_DOMAIN: Region …	NA	Unknown	signal peptide
Ec-00_011110	Ferric reductase transmembrane component-like domain	GO:0005506;GO:0006118;GO:0009055;GO:0016021;GO:0016491;GO:0050660	TMhelix: Region of a membrane-bound protein predicted to be embedded in the membrane.; IPR013130: Ferric reductase transmembrane component-like domain; SSF52343: ; PTHR11972: ; CYTOPLASMIC_DOMAIN: Region of a membrane-bound protein predicted to be outside the membrane, in the cytoplasm.; NON_CYTOPLASMIC_DOMAIN: Region of a membrane-bound protein predicted to be outside the membrane, in the extrac…	NA	Membrane function and transporters	signal peptide
Ec-00_011120	conserved unknown protein	n/a;n/a;n/a	NA	NA	Unknown	other localisation
Ec-00_011130	haloalkane dehalogenase, putative	NA	IPR029058: Alpha/Beta hydrolase fold; IPR000639: Epoxide hydrolase-like; IPR000073: Alpha/beta hydrolase fold-1; PTHR10992:	NA	Metabolism	other localisation
Ec-00_011140	hypothetical protein	n/a;n/a;n/a	NA	NA	Unknown	other localisation
Ec-00_011150	hypothetical protein	n/a;n/a;n/a	NA	NA	Unknown	other localisation
Ec-00_011160	Uncharacterised protein family UPF0060	GO:0016020	TMhelix: Region of a membrane-bound protein predicted to be embedded in the membrane.; CYTOPLASMIC_DOMAIN: Region of a membrane-bound protein predicted to be outside the membrane, in the cytoplasm.; SSF103481: ; NON_CYTOPLASMIC_DOMAIN: Region of a membrane-bound protein predicted to be outside the membrane, in the extracellular region; PTHR36116:SF1: ; IPR003844: Uncharacterised protein family UP…	NA	Unknown	signal anchor
Ec-00_011170	hypothetical protein	n/a;n/a;n/a	NA	NA	Unknown	other localisation
Ec-00_011180	Hypothetical protein	n/a;n/a;n/a	NA	NA	Unknown	other localisation
Ec-00_011190	conserved unknown protein	n/a;n/a;n/a	G3DSA:1.20.5.170: ; Coil:	NA	Unknown	other localisation
Ec-00_011200	NAD-dependent epimerase/dehydratase, N-terminal domain	GO:0003824;GO:0050662	IPR001509: NAD-dependent epimerase/dehydratase, N-terminal domain; SSF51735: ; IPR016040: NAD(P)-binding domain; PTHR10366:	NA	Metabolism	other localisation
Ec-00_011210	hypothetical protein	n/a;n/a;n/a	NA	NA	Unknown	other localisation
Ec-00_011230	conserved unknown protein	n/a;n/a;n/a	NON_CYTOPLASMIC_DOMAIN: Region of a membrane-bound protein predicted to be outside the membrane, in the extracellular region; SignalP-noTM: ; SIGNAL_PEPTIDE: Signal peptide region; SIGNAL_PEPTIDE_N_REGION: N-terminal region of a signal peptide.; SIGNAL_PEPTIDE_H_REGION: Hydrophobic region of a signal peptide.; SIGNAL_PEPTIDE_C_REGION: C-terminal region of a signal peptide.; SignalP-TM:	NA	Unknown	signal peptide
Ec-00_011240	hypothetical protein	n/a;n/a;n/a	NA	NA	Unknown	other localisation
Ec-00_011250	conserved unknown protein	n/a;n/a;n/a	NA	NA	Unknown	other localisation
Ec-00_011260	expressed unknown protein	n/a;n/a;n/a	NON_CYTOPLASMIC_DOMAIN: Region of a membrane-bound protein predicted to be outside the membrane, in the extracellular region; SIGNAL_PEPTIDE: Signal peptide region; SIGNAL_PEPTIDE_N_REGION: N-terminal region of a signal peptide.; SIGNAL_PEPTIDE_H_REGION: Hydrophobic region of a signal peptide.; SignalP-TM: ; SIGNAL_PEPTIDE_C_REGION: C-terminal region of a signal peptide.	NA	Unknown	other localisation
Ec-00_011270	Hypothetical protein	n/a;n/a;n/a	NA	NA	Unknown	other localisation
Ec-00_011280	Hypothetical protein	n/a;n/a;n/a	NA	NA	Unknown	other localisation
Ec-00_011290	Hypothetical protein	n/a;n/a;n/a	NA	NA	Unknown	other localisation
Ec-00_011300	expressed unknown protein	GO:0008270	NA	NA	Unknown	other localisation
Ec-00_011320	Hypothetical protein	n/a;n/a;n/a	CYTOPLASMIC_DOMAIN: Region of a membrane-bound protein predicted to be outside the membrane, in the cytoplasm.; NON_CYTOPLASMIC_DOMAIN: Region of a membrane-bound protein predicted to be outside the membrane, in the extracellular region; TMhelix: Region of a membrane-bound protein predicted to be embedded in the membrane.; TRANSMEMBRANE: Region of a membrane-bound protein predicted to be embedded…	NA	Unknown	signal anchor
Ec-00_011330	expressed unknown protein	n/a;n/a;n/a	NA	NA	Unknown	other localisation
Ec-00_011340	FAM92 protein	n/a;n/a;n/a	IPR009602: FAM92 protein	NA	Cytoskeleton and flagella	other localisation
Ec-00_011350	expressed unknown protein	n/a;n/a;n/a	CYTOPLASMIC_DOMAIN: Region of a membrane-bound protein predicted to be outside the membrane, in the cytoplasm.; PTHR18966: ; NON_CYTOPLASMIC_DOMAIN: Region of a membrane-bound protein predicted to be outside the membrane, in the extracellular region; TMhelix: Region of a membrane-bound protein predicted to be embedded in the membrane.; PTHR18966:SF117: ; TRANSMEMBRANE: Region of a membrane-bound …	NA	Unknown	other localisation
Ec-00_011360	hypothetical protein	n/a;n/a;n/a	Coil:	NA	Unknown	other localisation
Ec-00_011370	Domain of unknown function DUF3449	GO:0003676;GO:0005634;GO:0008270	SIGNAL_PEPTIDE: Signal peptide region; IPR000690: Zinc finger, C2H2-type matrin; SIGNAL_PEPTIDE_N_REGION: N-terminal region of a signal peptide.; SIGNAL_PEPTIDE_C_REGION: C-terminal region of a signal peptide.; NON_CYTOPLASMIC_DOMAIN: Region of a membrane-bound protein predicted to be outside the membrane, in the extracellular region; PTHR12786: ; SIGNAL_PEPTIDE_H_REGION: Hydrophobic region of a …	NA	Unknown	signal peptide
Ec-00_011380	expressed unknown protein	n/a;GO:0005515	IPR015943: WD40/YVTN repeat-like-containing domain; Coil:	NA	Unknown	other localisation
Ec-00_011390	expressed unknown protein	n/a;n/a;n/a	Coil: ; SignalP-TM:	NA	Unknown	mitochondrion
Ec-00_011400	Hypothetical protein	n/a;n/a;n/a	NA	NA	Unknown	other localisation
Ec-00_011410	conserved unknown protein	GO:0016020	CYTOPLASMIC_DOMAIN: Region of a membrane-bound protein predicted to be outside the membrane, in the cytoplasm.; NON_CYTOPLASMIC_DOMAIN: Region of a membrane-bound protein predicted to be outside the membrane, in the extracellular region; IPR005045: CDC50/LEM3 family; TMhelix: Region of a membrane-bound protein predicted to be embedded in the membrane.; PTHR10926:SF0: ; TRANSMEMBRANE: Region of a …	NA	Unknown	signal anchor
Ec-00_011420	ADP-ribosylation factor-like 2-binding protein, domain	n/a;n/a;n/a	PTHR21532: ; IPR023379: ADP-ribosylation factor-like 2-binding protein, domain	NA	Metabolism	other localisation
Ec-00_011430	Heat Shock transcription factor	GO:0005634;GO:0006355;GO:0043565;GO:0003700	NA	NA	Transcription	other localisation
Ec-00_011440	Light harvesting complex protein	GO:0009765;GO:0016020	NA	NA	Photosynthesis	nd
Ec-00_011450	Tetratricopeptide-like helical domain	GO:0005515	SSF48452: ; IPR011990: Tetratricopeptide-like helical domain; SSF101447: ; Coil:	NA	Protein binding or modification	other localisation
Ec-00_011460	Folate-sensitive fragile site protein Fra10Ac1	n/a;n/a;n/a	IPR019129: Folate-sensitive fragile site protein Fra10Ac1; PTHR11567: ; Coil:	NA	Unknown	other localisation
Ec-00_011470	Nucleotide cyclase	GO:0009190;GO:0035556;GO:0016849;GO:0007242	PTHR16305: ; IPR029787: Nucleotide cyclase; IPR001054: Adenylyl cyclase class-3/4/guanylyl cyclase	NA	Metabolism	other localisation
Ec-00_011480	conserved unknown protein	n/a;n/a;n/a	PTHR23053:	NA	Unknown	other localisation
Ec-00_011490	Pectin lyase fold	n/a;n/a;n/a	IPR011050: Pectin lyase fold/virulence factor; IPR012334: Pectin lyase fold	NA	Cell wall and extracellular	other localisation
Ec-01_000020	expressed unknown protein	NA	NA	NA	Unknown	other localisation
Ec-01_000030	hypothetical protein	n/a;n/a;n/a	NA	NA	Unknown	other localisation
Ec-01_000040	Hypothetical protein	n/a;n/a;n/a	NA	NA	Unknown	other localisation
Ec-01_000050	S-layer domain-containing protein	n/a;n/a;n/a	SIGNAL_PEPTIDE: Signal peptide region; mobidb-lite: consensus disorder prediction; SIGNAL_PEPTIDE_N_REGION: N-terminal region of a signal peptide.; PR01217: Proline rich extensin signature; SIGNAL_PEPTIDE_C_REGION: C-terminal region of a signal peptide.; NON_CYTOPLASMIC_DOMAIN: Region of a membrane-bound protein predicted to be outside the membrane, in the extracellular region; SignalP-noTM: ; SI…	NA	Cell wall and extracellular	signal peptide
Ec-01_000060	diaminopimelate decarboxylase	n/a;GO:0003824	IPR022643: Orn/DAP/Arg decarboxylase 2, C-terminal; IPR009006: Alanine racemase/group IV decarboxylase, C-terminal; IPR029066: PLP-binding barrel; PTHR11482: ; IPR022644: Orn/DAP/Arg decarboxylase 2, N-terminal	NA	Metabolism	other localisation
Ec-01_000070	P-type ATPase, A domain	GO:0000166;GO:0046872	TMhelix: Region of a membrane-bound protein predicted to be embedded in the membrane.; IPR008250: P-type ATPase, A domain; IPR023299: P-type ATPase, cytoplasmic domain N; PTHR24093: ; SSF81653: ; IPR023214: HAD-like domain; CYTOPLASMIC_DOMAIN: Region of a membrane-bound protein predicted to be outside the membrane, in the cytoplasm.; NON_CYTOPLASMIC_DOMAIN: Region of a membrane-bound protein pred…	NA	Membrane function and transporters	other localisation
Ec-01_000080	Armadillo-like helical	n/a;GO:0005488	IPR011989: Armadillo-like helical; IPR016024: Armadillo-type fold	NA	Cellular regulation and signalling	other localisation
Ec-01_000090	Fatty acid desaturase	GO:0006629;GO:0016491;GO:0055114	CYTOPLASMIC_DOMAIN: Region of a membrane-bound protein predicted to be outside the membrane, in the cytoplasm.; NON_CYTOPLASMIC_DOMAIN: Region of a membrane-bound protein predicted to be outside the membrane, in the extracellular region; PTHR10984: ; PF13850: Endoplasmic Reticulum-Golgi Intermediate Compartment (ERGIC); IPR012936: Endoplasmic reticulum vesicle transporter, C-terminal; TRANSMEMBRA…	NA	Metabolism	signal anchor
Ec-01_000100	SAP domain	n/a;GO:0006629	CYTOPLASMIC_DOMAIN: Region of a membrane-bound protein predicted to be outside the membrane, in the cytoplasm.; IPR003034: SAP domain; NON_CYTOPLASMIC_DOMAIN: Region of a membrane-bound protein predicted to be outside the membrane, in the extracellular region; IPR005804: Fatty acid desaturase, type 1; PTHR32100: ; TMhelix: Region of a membrane-bound protein predicted to be embedded in the membran…	NA	Protein binding or modification	other localisation
Ec-01_000110	Serine-threonine/tyrosine-protein kinase catalytic domain	GO:0004672;GO:0006468	G3DSA:3.30.200.20: ; IPR001245: Serine-threonine/tyrosine-protein kinase catalytic domain; IPR011009: Protein kinase-like domain	NA	Cellular regulation and signalling	other localisation
Ec-01_000120	Peptidase C19, ubiquitin-specific peptidase, DUSP domain	GO:0004843	SSF50729: ; IPR006615: Peptidase C19, ubiquitin-specific peptidase, DUSP domain; IPR011993: Pleckstrin homology-like domain; G3DSA:1.10.510.10: ; IPR001849: Pleckstrin homology domain; IPR011009: Protein kinase-like domain	NA	Proteolysis	other localisation
Ec-01_000130	4'-phosphopantetheinyl transferase superfamily	GO:0000287;GO:0009059;GO:0008897	NON_CYTOPLASMIC_DOMAIN: Region of a membrane-bound protein predicted to be outside the membrane, in the extracellular region; SIGNAL_PEPTIDE: Signal peptide region; SignalP-noTM: ; IPR008278: 4'-phosphopantetheinyl transferase superfamily; SIGNAL_PEPTIDE_N_REGION: N-terminal region of a signal peptide.; SIGNAL_PEPTIDE_H_REGION: Hydrophobic region of a signal peptide.; SIGNAL_PEPTIDE_C_REGION: C-t…	NA	Metabolism	chloroplast
Ec-01_000140	Ribosomal RNA large subunit methyltransferase RlmN/Cfr	GO:0008173;GO:0003824;GO:0006364;GO:0005737;GO:0051536	SSF102114: ; IPR004383: Ribosomal RNA large subunit methyltransferase RlmN/Cfr; IPR007197: Radical SAM; G3DSA:3.80.30.10: ; SignalP-TM:	NA	Protein synthesis	other localisation
Ec-01_000150	hypothetical protein	n/a;n/a;n/a	NA	NA	Unknown	other localisation
Ec-01_000160	Protein of unknown function DUF938	n/a;n/a;n/a	IPR010342: Protein of unknown function DUF938; IPR029063: S-adenosyl-L-methionine-dependent methyltransferase	NA	Unknown	other localisation
Ec-01_000170	C-type lectin-like	GO:0005488	IPR016187: C-type lectin fold; TMhelix: Region of a membrane-bound protein predicted to be embedded in the membrane.; SIGNAL_PEPTIDE: Signal peptide region; SIGNAL_PEPTIDE_N_REGION: N-terminal region of a signal peptide.; IPR016186: C-type lectin-like; PTHR22801: ; SignalP-TM: ; SIGNAL_PEPTIDE_C_REGION: C-terminal region of a signal peptide.; IPR001304: C-type lectin; NON_CYTOPLASMIC_DOMAIN: Regi…	NA	Membrane function and transporters	signal peptide
Ec-01_000180	Thioredoxin-like fold	n/a;n/a;n/a	IPR002109: Glutaredoxin; IPR012336: Thioredoxin-like fold; IPR013766: Thioredoxin domain; IPR004480: Monothiol glutaredoxin-related	NA	Redox	other localisation
Ec-01_000190	conserved unknown protein	n/a;n/a;n/a	NA	NA	Unknown	other localisation
Ec-01_000200	conserved unknown protein	n/a;GO:0005515	IPR000048: IQ motif, EF-hand binding site	NA	Unknown	other localisation
Ec-01_000210	expressed unknown protein	n/a;n/a;n/a	Coil:	NA	Unknown	other localisation
Ec-01_000220	Short-chain dehydrogenase/reductase SDR	GO:0008152;GO:0016491	SSF51735: ; SIGNAL_PEPTIDE: Signal peptide region; SIGNAL_PEPTIDE_N_REGION: N-terminal region of a signal peptide.; IPR002347: Glucose/ribitol dehydrogenase; PTHR24318: ; IPR002198: Short-chain dehydrogenase/reductase SDR; SIGNAL_PEPTIDE_C_REGION: C-terminal region of a signal peptide.; NON_CYTOPLASMIC_DOMAIN: Region of a membrane-bound protein predicted to be outside the membrane, in the extrace…	NA	Metabolism	other localisation
Ec-01_000230	FAD binding / catalytic/ tRNA dihydrouridine synthase	GO:0017150;GO:0050660;GO:0055114;GO:0008033	IPR013785: Aldolase-type TIM barrel; SIGNAL_PEPTIDE: Signal peptide region; IPR001269: tRNA-dihydrouridine synthase; SIGNAL_PEPTIDE_N_REGION: N-terminal region of a signal peptide.; SSF51395: ; IPR018517: tRNA-dihydrouridine synthase, conserved site; SignalP-TM: ; SIGNAL_PEPTIDE_C_REGION: C-terminal region of a signal peptide.; NON_CYTOPLASMIC_DOMAIN: Region of a membrane-bound protein predicted …	NA	Metabolism	signal peptide
Ec-01_000240	Alpha/Beta hydrolase fold	GO:0006508;GO:0005515;GO:0008236	IPR001375: Peptidase S9, prolyl oligopeptidase, catalytic domain; PTHR11731: ; IPR029058: Alpha/Beta hydrolase fold; IPR015943: WD40/YVTN repeat-like-containing domain; SSF82171:	NA	Metabolism	other localisation
Ec-01_000250	hypothetical protein	n/a;n/a;n/a	Coil: ; PD968187: BETA-DEFENSIN ANTIBIOTIC PRECURSOR ANTIMICROBIAL DEFENSIN BETA SIGNAL DEFENSIN BD-32 DEFB-32	NA	Unknown	other localisation
Ec-01_000260	conserved unknown protein	n/a;n/a;n/a	Coil:	NA	Unknown	other localisation
Ec-01_000270	expressed unknown protein	n/a;n/a;n/a	NON_CYTOPLASMIC_DOMAIN: Region of a membrane-bound protein predicted to be outside the membrane, in the extracellular region; SignalP-noTM: ; SIGNAL_PEPTIDE: Signal peptide region; Coil: ; SIGNAL_PEPTIDE_N_REGION: N-terminal region of a signal peptide.; SIGNAL_PEPTIDE_H_REGION: Hydrophobic region of a signal peptide.; SIGNAL_PEPTIDE_C_REGION: C-terminal region of a signal peptide.; SignalP-TM:	NA	Unknown	chloroplast
Ec-01_000280	expressed unknown protein	n/a;n/a;n/a	TMhelix: Region of a membrane-bound protein predicted to be embedded in the membrane.; SIGNAL_PEPTIDE: Signal peptide region; SIGNAL_PEPTIDE_N_REGION: N-terminal region of a signal peptide.; SIGNAL_PEPTIDE_C_REGION: C-terminal region of a signal peptide.; SignalP-TM: ; CYTOPLASMIC_DOMAIN: Region of a membrane-bound protein predicted to be outside the membrane, in the cytoplasm.; NON_CYTOPLASMIC_D…	NA	Unknown	signal peptide
Ec-01_000290	Mitochondrial matrix Mmp37	n/a;n/a;n/a	IPR015222: Mitochondrial matrix Mmp37	NA	Membrane function and transporters	other localisation
Ec-01_000300	hypothetical protein	n/a;n/a;n/a	PTHR21595:SF0: ; Coil: ; PTHR21595: ; IPR011033: PRC-barrel-like; IPR014797: CKK domain	NA	Unknown	other localisation
Ec-01_000310	F-box, zinc finger protein	GO:0046872;GO:0005515	IPR001810: F-box domain; G3DSA:1.20.1280.50: ; IPR007087: Zinc finger, C2H2	NA	Proteolysis	other localisation
Ec-01_000320	ABC transporter type 1, transmembrane domain	GO:0006810;GO:0055085;GO:0005524;GO:0042626;GO:0016021;GO:0016887	PTHR11384: ; IPR003439: ABC transporter-like; SIGNAL_PEPTIDE: Signal peptide region; IPR027417: P-loop containing nucleoside triphosphate hydrolase; SIGNAL_PEPTIDE_N_REGION: N-terminal region of a signal peptide.; SIGNAL_PEPTIDE_C_REGION: C-terminal region of a signal peptide.; CYTOPLASMIC_DOMAIN: Region of a membrane-bound protein predicted to be outside the membrane, in the cytoplasm.; IPR00359…	NA	Membrane function and transporters	other localisation
Ec-01_000330	Winged helix-turn-helix DNA-binding domain	GO:0004867	G3DSA:1.20.1310.10: ; IPR011991: Winged helix-turn-helix DNA-binding domain; SSF46785: ; IPR016158: Cullin homology; IPR016159: Cullin repeat-like-containing domain; IPR019559: Cullin protein, neddylation domain; IPR001373: Cullin, N-terminal; PTHR11932: ; IPR016157: Cullin, conserved site; G3DSA:4.10.1030.10:	NA	Transcription	other localisation
Ec-01_000340	Ankyrin repeat-containing domain	n/a;GO:0004733;GO:0010181;GO:0055114	IPR020683: Ankyrin repeat-containing domain; IPR000659: Pyridoxamine 5'-phosphate oxidase; IPR012349: FMN-binding split barrel; IPR011576: Pyridoxamine 5'-phosphate oxidase-like, FMN-binding domain	NA	Membrane function and transporters	other localisation
Ec-01_000360	Uroporphyrinogen decarboxylase, chloroplast precursor	GO:0004853;GO:0006779	G3DSA:3.20.20.210: ; SIGNAL_PEPTIDE: Signal peptide region; SSF51726: ; SIGNAL_PEPTIDE_N_REGION: N-terminal region of a signal peptide.; SIGNAL_PEPTIDE_C_REGION: C-terminal region of a signal peptide.; SignalP-TM: ; NON_CYTOPLASMIC_DOMAIN: Region of a membrane-bound protein predicted to be outside the membrane, in the extracellular region; PTHR21091: ; IPR000257: Uroporphyrinogen decarboxylase (U…	KOG2872	Metabolism	chloroplast
Ec-01_000370	EF-hand domain pair	GO:0005509	IPR018247: EF-Hand 1, calcium-binding site; IPR011992: EF-hand domain pair; IPR002048: EF-hand domain; SSF47473: ; Coil:	NA	Cellular regulation and signalling	other localisation
Ec-01_000380	hypothetical protein	n/a;n/a;n/a	NA	NA	Unknown	other localisation
Ec-01_000390	Armadillo-type fold	GO:0005488	CYTOPLASMIC_DOMAIN: Region of a membrane-bound protein predicted to be outside the membrane, in the cytoplasm.; NON_CYTOPLASMIC_DOMAIN: Region of a membrane-bound protein predicted to be outside the membrane, in the extracellular region; PTHR14716: ; IPR011989: Armadillo-like helical; IPR016024: Armadillo-type fold; TRANSMEMBRANE: Region of a membrane-bound protein predicted to be embedded in the…	NA	Cellular regulation and signalling	other localisation
Ec-01_000400	Chlorophyll a/b binding protein domain	n/a;n/a;n/a	SIGNAL_PEPTIDE: Signal peptide region; SIGNAL_PEPTIDE_N_REGION: N-terminal region of a signal peptide.; IPR023329: Chlorophyll a/b binding protein domain; SignalP-TM: ; SIGNAL_PEPTIDE_C_REGION: C-terminal region of a signal peptide.; NON_CYTOPLASMIC_DOMAIN: Region of a membrane-bound protein predicted to be outside the membrane, in the extracellular region; SignalP-noTM: ; Coil: ; SIGNAL_PEPTIDE_…	NA	Photosynthesis	other localisation
Ec-01_000420	NADH dehydrogenase (ubiquinone)	GO:0016491;GO:0050660;GO:0055114	IPR000103: Pyridine nucleotide-disulphide oxidoreductase, class-II; SIGNAL_PEPTIDE: Signal peptide region; PR00368: FAD-dependent pyridine nucleotide reductase signature; SIGNAL_PEPTIDE_N_REGION: N-terminal region of a signal peptide.; PTHR22912: ; SignalP-TM: ; SIGNAL_PEPTIDE_C_REGION: C-terminal region of a signal peptide.; NON_CYTOPLASMIC_DOMAIN: Region of a membrane-bound protein predicted to…	KOG2495	Metabolism	mitochondrion
Ec-01_000430	Glutamyl-tRNA Reductase, chloroplast precursor	GO:0050661;GO:0008883;GO:0033014;GO:0055114	IPR006151: Quinate/shikimate 5-dehydrogenase/glutamyl-tRNA reductase; SSF51735: ; IPR018214: Glutamyl-tRNA reductase, conserved site; SIGNAL_PEPTIDE: Signal peptide region; TMhelix: Region of a membrane-bound protein predicted to be embedded in the membrane.; IPR015896: Tetrapyrrole biosynthesis, glutamyl-tRNA reductase, dimerisation domain; SIGNAL_PEPTIDE_N_REGION: N-terminal region of a signal …	NA	Protein synthesis	chloroplast
Ec-01_000440	conserved unknown protein	GO:0005515	NA	NA	Unknown	other localisation
Ec-01_000450	expressed unknown protein	GO:0006520;GO:0030170;n/a	CYTOPLASMIC_DOMAIN: Region of a membrane-bound protein predicted to be outside the membrane, in the cytoplasm.; NON_CYTOPLASMIC_DOMAIN: Region of a membrane-bound protein predicted to be outside the membrane, in the extracellular region; TMhelix: Region of a membrane-bound protein predicted to be embedded in the membrane.; TRANSMEMBRANE: Region of a membrane-bound protein predicted to be embedded…	NA	Unknown	signal peptide
Ec-01_000460	Ankyrin repeat-containing domain	n/a;GO:0005515	IPR020675: Myosin light chain kinase-related; IPR020683: Ankyrin repeat-containing domain; IPR002110: Ankyrin repeat	NA	Membrane function and transporters	other localisation
Ec-01_000470	EsV-1-7 domain protein	NA	NA	NA	Cellular regulation and signalling	other localisation
Ec-01_000480	hypothetical protein	n/a;n/a;n/a	NA	NA	Unknown	other localisation
Ec-01_000490	Programmed cell death protein 2, C-terminal	GO:0005737	IPR007320: Programmed cell death protein 2, C-terminal; PTHR12298: ; Coil:	NA	Cellular regulation and signalling	other localisation
Ec-01_000500	Exonuclease	GO:0004527	IPR006055: Exonuclease; IPR012337: Ribonuclease H-like domain; PTHR12801: ; IPR013520: Exonuclease, RNase T/DNA polymerase III	NA	RNA modification or binding	other localisation
Ec-01_000510	expressed unknown protein	n/a;n/a;n/a	TMhelix: Region of a membrane-bound protein predicted to be embedded in the membrane.; SIGNAL_PEPTIDE: Signal peptide region; SIGNAL_PEPTIDE_N_REGION: N-terminal region of a signal peptide.; SIGNAL_PEPTIDE_C_REGION: C-terminal region of a signal peptide.; SignalP-TM: ; CYTOPLASMIC_DOMAIN: Region of a membrane-bound protein predicted to be outside the membrane, in the cytoplasm.; NON_CYTOPLASMIC_D…	NA	Unknown	signal peptide
Ec-01_000520	Uncharacterised protein family UPF0001	n/a;n/a;n/a	IPR011078: Uncharacterised protein family UPF0001; SIGNAL_PEPTIDE: Signal peptide region; SIGNAL_PEPTIDE_N_REGION: N-terminal region of a signal peptide.; IPR001608: Alanine racemase, N-terminal; SignalP-TM: ; SIGNAL_PEPTIDE_C_REGION: C-terminal region of a signal peptide.; NON_CYTOPLASMIC_DOMAIN: Region of a membrane-bound protein predicted to be outside the membrane, in the extracellular region…	NA	Unknown	other localisation
Ec-01_000530	NC2alpha class protein with histone-like transcription factor (NF-YC subunit) domain	GO:0046982	NA	NA	Transcription	other localisation
Ec-01_000540	Kinesin motor domain	GO:0003777;GO:0005524;GO:0005871;GO:0007018;GO:0008017	PTHR24115:SF136: ; IPR019821: Kinesin motor domain, conserved site; IPR027640: Kinesin-like protein; IPR027417: P-loop containing nucleoside triphosphate hydrolase; Coil: ; IPR001752: Kinesin motor domain	NA	Cytoskeleton and flagella	other localisation
Ec-01_000560	expressed unknown protein	GO:0005515;GO:0016020;GO:0016192	Coil:	NA	Unknown	other localisation
Ec-01_000570	NMD3	n/a;n/a;n/a	PTHR12746: ; IPR007064: NMD3	NA	Protein synthesis	other localisation
Ec-01_000580	Guanine nucleotide binding protein beta subunit	NA	IPR019775: WD40 repeat, conserved site; IPR017986: WD40-repeat-containing domain; IPR001680: WD40 repeat; IPR015943: WD40/YVTN repeat-like-containing domain; PTHR19868: ; IPR020472: G-protein beta WD-40 repeat	NA	Cellular regulation and signalling	other localisation
Ec-01_000590	WD40/YVTN repeat-like-containing domain	GO:0005515	IPR017986: WD40-repeat-containing domain; IPR015943: WD40/YVTN repeat-like-containing domain; IPR001680: WD40 repeat; PTHR19868:	NA	Protein binding or modification	other localisation
Ec-01_000600	Similar to Rrp6, which is a component of the exosome 3'->5' exoribonuclease complex, a complex that degrades mRNAs.	GO:0005622;GO:0003676;GO:0008408;GO:0006139	PTHR12124:SF47: ; IPR012337: Ribonuclease H-like domain; PTHR12124: ; IPR001374: R3H domain; IPR002562: 3'-5' exonuclease domain	NA	RNA modification or binding	other localisation
Ec-01_000620	conserved unknown protein	GO:0016813;GO:0046872	CYTOPLASMIC_DOMAIN: Region of a membrane-bound protein predicted to be outside the membrane, in the cytoplasm.; NON_CYTOPLASMIC_DOMAIN: Region of a membrane-bound protein predicted to be outside the membrane, in the extracellular region; TMhelix: Region of a membrane-bound protein predicted to be embedded in the membrane.; TRANSMEMBRANE: Region of a membrane-bound protein predicted to be embedded…	NA	Unknown	other localisation
Ec-01_000630	NatC N(alpha)-terminal acetyltransferase, Mak10 subunit	n/a;n/a;n/a	PTHR21373: ; IPR007244: NatC N(alpha)-terminal acetyltransferase, Mak10 subunit; Coil:	NA	Protein binding or modification	other localisation
Ec-01_000640	Chloride channel protein EriC	GO:0016020;GO:0055085;GO:0005216;GO:0006821;GO:0005247	CYTOPLASMIC_DOMAIN: Region of a membrane-bound protein predicted to be outside the membrane, in the cytoplasm.; IPR014743: Chloride channel, core; NON_CYTOPLASMIC_DOMAIN: Region of a membrane-bound protein predicted to be outside the membrane, in the extracellular region; IPR001807: Chloride channel, voltage gated; G3DSA:3.10.580.10: ; TMhelix: Region of a membrane-bound protein predicted to be e…	NA	Membrane function and transporters	other localisation
Ec-01_000650	peptidase S8 and S53	NA	TMhelix: Region of a membrane-bound protein predicted to be embedded in the membrane.; IPR000209: Peptidase S8/S53 domain; SIGNAL_PEPTIDE_N_REGION: N-terminal region of a signal peptide.; IPR015500: Peptidase S8, subtilisin-related; SignalP-TM: ; NON_CYTOPLASMIC_DOMAIN: Region of a membrane-bound protein predicted to be outside the membrane, in the extracellular region; IPR022398: Peptidase S8, s…	KOG1153	Proteolysis	signal peptide
Ec-01_000660	Regulator of chromosome condensation 1/beta-lactamase-inhibitor protein II	n/a;n/a;n/a	PTHR22870: ; IPR009091: Regulator of chromosome condensation 1/beta-lactamase-inhibitor protein II; IPR000408: Regulator of chromosome condensation, RCC1	NA	DNA or chromatin modification	other localisation
Ec-01_000670	conserved unknown protein	n/a;n/a;n/a	NA	NA	Unknown	other localisation
Ec-01_000680	Cyclic nucleotide-binding domain	n/a;n/a;n/a	IPR000595: Cyclic nucleotide-binding domain; IPR018490: Cyclic nucleotide-binding-like; IPR014710: RmlC-like jelly roll fold	NA	Cellular regulation and signalling	other localisation
Ec-01_000690	Pseudouridine synthase I, TruA, C-terminal	GO:0003723;GO:0009451;GO:0009982;GO:0001522	IPR020103: Pseudouridine synthase, catalytic domain; IPR020097: Pseudouridine synthase I, TruA, alpha/beta domain; SIGNAL_PEPTIDE: Signal peptide region; SIGNAL_PEPTIDE_N_REGION: N-terminal region of a signal peptide.; SIGNAL_PEPTIDE_C_REGION: C-terminal region of a signal peptide.; SignalP-TM: ; IPR020094: Pseudouridine synthase I, TruA, N-terminal; NON_CYTOPLASMIC_DOMAIN: Region of a membrane-b…	NA	Metabolism	chloroplast
Ec-01_000700	Transglutaminase-like	n/a;n/a;n/a	IPR002931: Transglutaminase-like; SSF54001:	NA	Metabolism	other localisation
Ec-01_000710	High mobility group and PHD zinc finger domain protein	GO:0008270	IPR019786: Zinc finger, PHD-type, conserved site; IPR013083: Zinc finger, RING/FYVE/PHD-type; IPR001965: Zinc finger, PHD-type; IPR009071: High mobility group box domain; IPR011011: Zinc finger, FYVE/PHD-type; IPR019787: Zinc finger, PHD-finger	NA	Transcription	other localisation
Ec-01_000720	hypothetical protein	n/a;n/a;n/a	NA	NA	Unknown	other localisation
Ec-01_000730	Hypothetical protein	n/a;n/a;n/a	NA	NA	Unknown	other localisation
Ec-01_000740	Putative cyclin A	n/a;n/a;n/a	IPR004367: Cyclin, C-terminal domain; PIRSF001771: ; IPR013763: Cyclin-like; IPR006671: Cyclin, N-terminal; PTHR10177:	KOG0653	Cell cycle	other localisation
Ec-01_000750	Phosphatidylinositol 3- and 4-kinase family protein	GO:0006464;GO:0005515	G3DSA:3.10.20.90: ; IPR000403: Phosphatidylinositol 3-/4-kinase, catalytic domain; IPR029071: Ubiquitin-related domain; IPR000626: Ubiquitin-like; PTHR15245:	NA	Metabolism	other localisation
Ec-01_000760	tRNA-splicing ligase, RtcB	GO:0006396;GO:0008452	IPR027513: tRNA-splicing ligase RtcB homologue, eukaryotic; IPR001233: tRNA-splicing ligase, RtcB	NA	Protein synthesis	other localisation
Ec-01_000770	Vacuolar protein sorting-associated protein 16	GO:0006886;GO:0007033	IPR006926: Vps16, N-terminal; IPR016534: Vacuolar protein sorting-associated protein 16; PTHR12811:	NA	Vesicle trafficking and secretion	other localisation
Ec-01_000780	vacuolar protein sorting vps16	GO:0005737;GO:0006886	CYTOPLASMIC_DOMAIN: Region of a membrane-bound protein predicted to be outside the membrane, in the cytoplasm.; NON_CYTOPLASMIC_DOMAIN: Region of a membrane-bound protein predicted to be outside the membrane, in the extracellular region; IPR006926: Vps16, N-terminal; PTHR12811: ; IPR016534: Vacuolar protein sorting-associated protein 16; IPR006925: Vps16, C-terminal; TRANSMEMBRANE: Region of a me…	NA	Vesicle trafficking and secretion	mitochondrion
Ec-01_000790	Protein kinase	NA	PTHR23257: ; IPR000719: Protein kinase domain; G3DSA:3.30.200.20: ; G3DSA:1.10.510.10: ; IPR001245: Serine-threonine/tyrosine-protein kinase catalytic domain; Coil: ; IPR011009: Protein kinase-like domain	NA	Cellular regulation and signalling	other localisation
Ec-01_000800	NADH-ubiquinone oxidoreductase, subunit 10	n/a;n/a;n/a	IPR019377: NADH-ubiquinone oxidoreductase, subunit 10; IPR020163: Complex I subunit NDUFS6; PTHR13094:	NA	Metabolism	other localisation
Ec-01_000810	expressed unknown protein	n/a;n/a;n/a	NA	NA	Unknown	other localisation
Ec-01_000820	Beta-lactamase-like	GO:0016787	PTHR12553: ; IPR027794: tRNase Z endonuclease; PF12706: Beta-lactamase superfamily domain; IPR001279: Beta-lactamase-like	NA	Metabolism	other localisation
Ec-01_000830	conserved unknown protein	n/a;n/a;n/a	NON_CYTOPLASMIC_DOMAIN: Region of a membrane-bound protein predicted to be outside the membrane, in the extracellular region; SignalP-noTM: ; SIGNAL_PEPTIDE: Signal peptide region; Coil: ; SIGNAL_PEPTIDE_N_REGION: N-terminal region of a signal peptide.; SIGNAL_PEPTIDE_H_REGION: Hydrophobic region of a signal peptide.; SIGNAL_PEPTIDE_C_REGION: C-terminal region of a signal peptide.; SignalP-TM:	NA	Unknown	signal peptide
Ec-01_000840	Mg2+ transporter protein, CorA-like/Zinc transport protein ZntB	GO:0016020;GO:0015693;GO:0055085;GO:0046873;GO:0015095;GO:0030001	CYTOPLASMIC_DOMAIN: Region of a membrane-bound protein predicted to be outside the membrane, in the cytoplasm.; NON_CYTOPLASMIC_DOMAIN: Region of a membrane-bound protein predicted to be outside the membrane, in the extracellular region; TMhelix: Region of a membrane-bound protein predicted to be embedded in the membrane.; IPR026573: Magnesium transporter MRS2/LPE10; IPR002523: Mg2+ transporter p…	NA	Membrane function and transporters	other localisation
Ec-01_000850	Solute carrier family 35 member SLC35F1/F2/F6	GO:0006810;GO:0016021	SSF103481: ; CYTOPLASMIC_DOMAIN: Region of a membrane-bound protein predicted to be outside the membrane, in the cytoplasm.; NON_CYTOPLASMIC_DOMAIN: Region of a membrane-bound protein predicted to be outside the membrane, in the extracellular region; TMhelix: Region of a membrane-bound protein predicted to be embedded in the membrane.; PTHR14233: ; PTHR14233:SF4: ; IPR009262: Solute carrier famil…	NA	Membrane function and transporters	other localisation
Ec-01_000860	expressed unknown protein	n/a;n/a;n/a	NA	NA	Unknown	other localisation
Ec-01_000870	B1358B12.18	n/a;n/a;n/a	SIGNAL_PEPTIDE: Signal peptide region; SIGNAL_PEPTIDE_N_REGION: N-terminal region of a signal peptide.; PTHR24015: ; SIGNAL_PEPTIDE_C_REGION: C-terminal region of a signal peptide.; NON_CYTOPLASMIC_DOMAIN: Region of a membrane-bound protein predicted to be outside the membrane, in the extracellular region; IPR002885: Pentatricopeptide repeat; SignalP-noTM: ; Coil: ; SIGNAL_PEPTIDE_H_REGION: Hydro…	NA	Unknown	signal peptide
Ec-01_000890	expressed unknown protein	n/a;n/a;n/a	NON_CYTOPLASMIC_DOMAIN: Region of a membrane-bound protein predicted to be outside the membrane, in the extracellular region; SignalP-noTM: ; TMhelix: Region of a membrane-bound protein predicted to be embedded in the membrane.; SIGNAL_PEPTIDE: Signal peptide region; SIGNAL_PEPTIDE_N_REGION: N-terminal region of a signal peptide.; SIGNAL_PEPTIDE_H_REGION: Hydrophobic region of a signal peptide.; …	NA	Unknown	signal peptide
Ec-01_000900	Carbohydrate-binding WSC	NA	IPR013994: Carbohydrate-binding WSC, subgroup; SIGNAL_PEPTIDE: Signal peptide region; TMhelix: Region of a membrane-bound protein predicted to be embedded in the membrane.; IPR002889: Carbohydrate-binding WSC; SIGNAL_PEPTIDE_N_REGION: N-terminal region of a signal peptide.; SIGNAL_PEPTIDE_C_REGION: C-terminal region of a signal peptide.; SignalP-TM: ; NON_CYTOPLASMIC_DOMAIN: Region of a membrane-…	NA	Cell wall and extracellular	signal peptide
Ec-01_000910	Carbohydrate-binding WSC	n/a;n/a;n/a	IPR013994: Carbohydrate-binding WSC, subgroup; SIGNAL_PEPTIDE: Signal peptide region; IPR002889: Carbohydrate-binding WSC; SIGNAL_PEPTIDE_N_REGION: N-terminal region of a signal peptide.; SIGNAL_PEPTIDE_C_REGION: C-terminal region of a signal peptide.; SignalP-TM: ; NON_CYTOPLASMIC_DOMAIN: Region of a membrane-bound protein predicted to be outside the membrane, in the extracellular region; Signal…	NA	Cell wall and extracellular	signal peptide
Ec-01_000920	expressed unknown protein	n/a;n/a;n/a	NON_CYTOPLASMIC_DOMAIN: Region of a membrane-bound protein predicted to be outside the membrane, in the extracellular region; SIGNAL_PEPTIDE: Signal peptide region; SignalP-noTM: ; SIGNAL_PEPTIDE_N_REGION: N-terminal region of a signal peptide.; SIGNAL_PEPTIDE_H_REGION: Hydrophobic region of a signal peptide.; SIGNAL_PEPTIDE_C_REGION: C-terminal region of a signal peptide.; SignalP-TM:	NA	Unknown	signal peptide
Ec-01_000930	von Willebrand factor, type A	GO:0005515;GO:0006886;GO:0006888;GO:0030127	PTHR13803: ; IPR002035: von Willebrand factor, type A	NA	Cell wall and extracellular	other localisation
Ec-01_000940	hypothetical protein	n/a;n/a;n/a	NA	NA	Unknown	other localisation
Ec-01_000950	hypothetical protein	n/a;n/a;n/a	NA	NA	Unknown	other localisation
Ec-01_000960	Mitochondrial carrier protein	GO:0055085	CYTOPLASMIC_DOMAIN: Region of a membrane-bound protein predicted to be outside the membrane, in the cytoplasm.; PTHR24089: ; NON_CYTOPLASMIC_DOMAIN: Region of a membrane-bound protein predicted to be outside the membrane, in the extracellular region; IPR002067: Mitochondrial carrier protein; IPR023395: Mitochondrial carrier domain; IPR018108: Mitochondrial substrate/solute carrier; TRANSMEMBRANE:…	NA	Membrane function and transporters	other localisation
Ec-01_000970	expressed unknown protein	n/a;n/a;n/a	NON_CYTOPLASMIC_DOMAIN: Region of a membrane-bound protein predicted to be outside the membrane, in the extracellular region; SIGNAL_PEPTIDE: Signal peptide region; SIGNAL_PEPTIDE_N_REGION: N-terminal region of a signal peptide.; SIGNAL_PEPTIDE_H_REGION: Hydrophobic region of a signal peptide.; SIGNAL_PEPTIDE_C_REGION: C-terminal region of a signal peptide.	NA	Unknown	other localisation
Ec-01_000980	plastid phosphoglycerate mutase protein precursor	GO:0003824;GO:0008152	IPR013078: Histidine phosphatase superfamily, clade-1; NON_CYTOPLASMIC_DOMAIN: Region of a membrane-bound protein predicted to be outside the membrane, in the extracellular region; IPR001345: Phosphoglycerate/bisphosphoglycerate mutase, active site; PTHR23029: ; IPR029033: Histidine phosphatase superfamily; SIGNAL_PEPTIDE: Signal peptide region; SIGNAL_PEPTIDE_N_REGION: N-terminal region of a sig…	NA	Metabolism	other localisation
Ec-01_000990	RNA ligase/cyclic nucleotide phosphodiesterase	GO:0003824;GO:0005622;GO:0016070	IPR009097: RNA ligase/cyclic nucleotide phosphodiesterase; IPR019510: Protein kinase A anchor protein, nuclear localisation signal domain; PTHR15934:	NA	RNA modification or binding	other localisation
Ec-01_001000	Tetratricopeptide-like helical domain	GO:0005515	SSF48452: ; IPR011990: Tetratricopeptide-like helical domain; G3DSA:3.10.50.40: ; IPR013026: Tetratricopeptide repeat-containing domain; IPR023566: Peptidyl-prolyl cis-trans isomerase, FKBP-type; IPR019734: Tetratricopeptide repeat	NA	Protein binding or modification	other localisation
Ec-01_001010	Zinc finger, CCHC-type	GO:0003676;GO:0008270	PTHR23002: ; CYTOPLASMIC_DOMAIN: Region of a membrane-bound protein predicted to be outside the membrane, in the cytoplasm.; NON_CYTOPLASMIC_DOMAIN: Region of a membrane-bound protein predicted to be outside the membrane, in the extracellular region; PTHR23002:SF73: ; IPR001878: Zinc finger, CCHC-type; TRANSMEMBRANE: Region of a membrane-bound protein predicted to be embedded in the membrane.	NA	Cellular regulation and signalling	other localisation
Ec-01_001020	Mediator complex, subunit Med4	GO:0006357;GO:0016592;GO:0001104	Coil: ; IPR019258: Mediator complex, subunit Med4; PTHR13208:	NA	Transcription	other localisation
Ec-01_001030	hypothetical protein	n/a;n/a;n/a	Coil:	NA	Unknown	other localisation
Ec-01_001040	Cation efflux protein	GO:0055085;GO:0016021;GO:0006812;GO:0008324	TMhelix: Region of a membrane-bound protein predicted to be embedded in the membrane.; SIGNAL_PEPTIDE: Signal peptide region; SIGNAL_PEPTIDE_N_REGION: N-terminal region of a signal peptide.; SIGNAL_PEPTIDE_C_REGION: C-terminal region of a signal peptide.; CYTOPLASMIC_DOMAIN: Region of a membrane-bound protein predicted to be outside the membrane, in the cytoplasm.; NON_CYTOPLASMIC_DOMAIN: Region …	NA	Membrane function and transporters	other localisation
Ec-01_001050	Hypothetical protein	n/a;n/a;n/a	NA	NA	Unknown	nd
Ec-01_001060	TFIIH p62 subunit, N-terminal	n/a;n/a;n/a	IPR027079: TFIIH subunit Tfb1/p62; SSF50729: ; IPR011993: Pleckstrin homology-like domain; SSF140383: ; IPR005607: BSD; IPR013876: TFIIH p62 subunit, N-terminal	NA	Transcription	other localisation
Ec-01_001070	SET domain and Rubisco LSMT substrate-binding domain protein	GO:0005515	NA	NA	DNA or chromatin modification	other localisation
Ec-01_001080	SelB, translation elongation factor specific to Sec-tRNA	GO:0003924;GO:0005525	IPR004161: Translation elongation factor EFTu/EF1A, domain 2; PTHR23115: ; IPR027417: P-loop containing nucleoside triphosphate hydrolase; G3DSA:2.40.30.10: ; PF00009: Elongation factor Tu GTP binding domain; IPR009000: Translation protein, beta-barrel domain	NA	Protein synthesis	other localisation
Ec-01_001090	ADP/ATP carrier protein	GO:0005471;GO:0005524;GO:0006810;GO:0016021	CYTOPLASMIC_DOMAIN: Region of a membrane-bound protein predicted to be outside the membrane, in the cytoplasm.; IPR004667: ADP/ATP carrier protein; NON_CYTOPLASMIC_DOMAIN: Region of a membrane-bound protein predicted to be outside the membrane, in the extracellular region; IPR020846: Major facilitator superfamily domain; TMhelix: Region of a membrane-bound protein predicted to be embedded in the …	NA	Membrane function and transporters	other localisation
Ec-01_001100	expressed unknown protein	n/a;n/a;n/a	Coil:	NA	Unknown	other localisation
Ec-01_001110	Amino acid transporter, transmembrane	n/a;n/a;n/a	CYTOPLASMIC_DOMAIN: Region of a membrane-bound protein predicted to be outside the membrane, in the cytoplasm.; NON_CYTOPLASMIC_DOMAIN: Region of a membrane-bound protein predicted to be outside the membrane, in the extracellular region; TMhelix: Region of a membrane-bound protein predicted to be embedded in the membrane.; IPR013057: Amino acid transporter, transmembrane domain; PTHR22950: ; TRAN…	NA	Membrane function and transporters	other localisation
Ec-01_001120	Cytochrome c oxidase subunit Vb.	GO:0004129;GO:0005740;GO:0006118	CYTOPLASMIC_DOMAIN: Region of a membrane-bound protein predicted to be outside the membrane, in the cytoplasm.; NON_CYTOPLASMIC_DOMAIN: Region of a membrane-bound protein predicted to be outside the membrane, in the extracellular region; TMhelix: Region of a membrane-bound protein predicted to be embedded in the membrane.; IPR013057: Amino acid transporter, transmembrane domain; PTHR22950: ; TRAN…	KOG3352	Respiration	other localisation
Ec-01_001140	WW domain	GO:0005515	IPR001202: WW domain; G3DSA:2.20.70.10:	NA	Protein binding or modification	other localisation
Ec-01_001150	Domain of unknown function DUF1279	n/a;n/a;n/a	CYTOPLASMIC_DOMAIN: Region of a membrane-bound protein predicted to be outside the membrane, in the cytoplasm.; NON_CYTOPLASMIC_DOMAIN: Region of a membrane-bound protein predicted to be outside the membrane, in the extracellular region; IPR009688: Domain of unknown function DUF1279; PTHR21377: ; SignalP-TM: ; TRANSMEMBRANE: Region of a membrane-bound protein predicted to be embedded in the membr…	NA	Unknown	mitochondrion
Ec-01_001160	Defective-in-cullin neddylation protein	n/a;n/a;n/a	IPR014764: Defective-in-cullin neddylation protein; IPR005176: Potentiating neddylation domain; G3DSA:1.10.8.10: ; PF14555: UBA-like domain	NA	Proteolysis	other localisation
Ec-01_001170	Acetyltransferase (GNAT) domain protein	GO:0008080	NA	NA	DNA or chromatin modification	signal peptide
Ec-01_001180	SGF29 tudor-like domain	n/a;n/a;n/a	IPR010750: SGF29 tudor-like domain; PTHR21539:	NA	DNA or chromatin modification	other localisation
Ec-01_001190	expressed unknown protein	GO:0006464;GO:0005515	NON_CYTOPLASMIC_DOMAIN: Region of a membrane-bound protein predicted to be outside the membrane, in the extracellular region; SIGNAL_PEPTIDE: Signal peptide region; IPR000626: Ubiquitin-like; SIGNAL_PEPTIDE_N_REGION: N-terminal region of a signal peptide.; SIGNAL_PEPTIDE_H_REGION: Hydrophobic region of a signal peptide.; SIGNAL_PEPTIDE_C_REGION: C-terminal region of a signal peptide.	NA	Unknown	other localisation
Ec-01_001200	MULE transposase domain	n/a;n/a;n/a	IPR018289: MULE transposase domain; IPR031052: FHY3/FAR1 family; PTHR31669:SF11:	NA	Transposon or viral gene	other localisation
Ec-01_001210	Pathogenesis-related transcriptional factor and ERF	GO:0003700;GO:0006355	IPR016177: DNA-binding domain; IPR001471: AP2/ERF domain	NA	Transcription	other localisation
Ec-01_001220	ion channel nompc, putative	n/a;GO:0005515	IPR020683: Ankyrin repeat-containing domain; PTHR24198: ; PF13857: Ankyrin repeats (many copies); IPR002110: Ankyrin repeat	NA	Membrane function and transporters	other localisation
Ec-01_001230	Histidine phosphatase superfamily, clade-1	GO:0003824;GO:0005524;GO:0006003	IPR013078: Histidine phosphatase superfamily, clade-1; NON_CYTOPLASMIC_DOMAIN: Region of a membrane-bound protein predicted to be outside the membrane, in the extracellular region; IPR001345: Phosphoglycerate/bisphosphoglycerate mutase, active site; IPR029033: Histidine phosphatase superfamily; IPR003094: Fructose-2,6-bisphosphatase; SignalP-noTM: ; SIGNAL_PEPTIDE: Signal peptide region; SIGNAL_P…	NA	Cellular regulation and signalling	signal peptide
Ec-01_001240	expressed unknown protein	n/a;n/a;n/a	CYTOPLASMIC_DOMAIN: Region of a membrane-bound protein predicted to be outside the membrane, in the cytoplasm.; NON_CYTOPLASMIC_DOMAIN: Region of a membrane-bound protein predicted to be outside the membrane, in the extracellular region; TMhelix: Region of a membrane-bound protein predicted to be embedded in the membrane.; TRANSMEMBRANE: Region of a membrane-bound protein predicted to be embedded…	NA	Unknown	mitochondrion
Ec-01_001250	WW domain	GO:0005515	IPR001202: WW domain; G3DSA:2.20.70.10:	NA	Protein binding or modification	other localisation
Ec-01_001260	hypothetical protein	n/a;n/a;n/a	NON_CYTOPLASMIC_DOMAIN: Region of a membrane-bound protein predicted to be outside the membrane, in the extracellular region; SIGNAL_PEPTIDE: Signal peptide region; SIGNAL_PEPTIDE_N_REGION: N-terminal region of a signal peptide.; SIGNAL_PEPTIDE_H_REGION: Hydrophobic region of a signal peptide.; SignalP-TM: ; SIGNAL_PEPTIDE_C_REGION: C-terminal region of a signal peptide.	NA	Unknown	signal peptide
Ec-01_001270	Citrate transporter-like domain	GO:0016020;GO:0055085;GO:0016021;GO:0006814;GO:0005215	CYTOPLASMIC_DOMAIN: Region of a membrane-bound protein predicted to be outside the membrane, in the cytoplasm.; PTHR10283: ; NON_CYTOPLASMIC_DOMAIN: Region of a membrane-bound protein predicted to be outside the membrane, in the extracellular region; IPR004680: Citrate transporter-like domain; TMhelix: Region of a membrane-bound protein predicted to be embedded in the membrane.; IPR001898: Sodium…	NA	Cytoskeleton and flagella	signal peptide
Ec-01_001290	AAA+ ATPase domain	GO:0005524;GO:0016887	TMhelix: Region of a membrane-bound protein predicted to be embedded in the membrane.; PS51257: Prokaryotic membrane lipoprotein lipid attachment site profile.; IPR003439: ABC transporter-like; SIGNAL_PEPTIDE_N_REGION: N-terminal region of a signal peptide.; SignalP-TM: ; IPR002781: Transmembrane protein TauE-like; NON_CYTOPLASMIC_DOMAIN: Region of a membrane-bound protein predicted to be outside…	NA	Membrane function and transporters	signal peptide
Ec-01_001300	Peptidase C19, ubiquitin carboxyl-terminal hydrolase	GO:0006511;GO:0036459	SSF54001: ; IPR028889: Ubiquitin specific protease domain; IPR001394: Peptidase C19, ubiquitin carboxyl-terminal hydrolase; SignalP-TM:	NA	Proteolysis	other localisation
Ec-01_001310	P-loop containing nucleoside triphosphate hydrolase	n/a;n/a;n/a	IPR027417: P-loop containing nucleoside triphosphate hydrolase; PF13604: AAA domain	NA	Metabolism	other localisation
Ec-01_001320	expressed unknown protein	n/a;n/a;n/a	CYTOPLASMIC_DOMAIN: Region of a membrane-bound protein predicted to be outside the membrane, in the cytoplasm.; NON_CYTOPLASMIC_DOMAIN: Region of a membrane-bound protein predicted to be outside the membrane, in the extracellular region; TMhelix: Region of a membrane-bound protein predicted to be embedded in the membrane.; TRANSMEMBRANE: Region of a membrane-bound protein predicted to be embedded…	NA	Unknown	signal peptide
Ec-01_001330	Hypothetical protein	n/a;n/a;n/a	NA	NA	Unknown	other localisation
Ec-01_001340	Citrate transporter-like domain	GO:0016020;GO:0055085;GO:0016021;GO:0006814;GO:0005215	CYTOPLASMIC_DOMAIN: Region of a membrane-bound protein predicted to be outside the membrane, in the cytoplasm.; PTHR10283: ; NON_CYTOPLASMIC_DOMAIN: Region of a membrane-bound protein predicted to be outside the membrane, in the extracellular region; IPR004680: Citrate transporter-like domain; TMhelix: Region of a membrane-bound protein predicted to be embedded in the membrane.; IPR001898: Sodium…	NA	Cytoskeleton and flagella	signal anchor
Ec-01_001350	phosphoglycerate kinase	GO:0006096;GO:0004618	IPR001576: Phosphoglycerate kinase; SIGNAL_PEPTIDE: Signal peptide region; SIGNAL_PEPTIDE_N_REGION: N-terminal region of a signal peptide.; SIGNAL_PEPTIDE_C_REGION: C-terminal region of a signal peptide.; SignalP-TM: ; IPR015824: Phosphoglycerate kinase, N-terminal; NON_CYTOPLASMIC_DOMAIN: Region of a membrane-bound protein predicted to be outside the membrane, in the extracellular region; Signal…	KOG1367	Metabolism	signal peptide
Ec-01_001360	Hypothetical protein	n/a;n/a;n/a	NA	NA	Unknown	nd
Ec-01_001370	UBX domain	GO:0005515	G3DSA:3.10.20.90: ; IPR001012: UBX domain; IPR029071: Ubiquitin-related domain; IPR018997: PUB domain; IPR006567: PUG domain; PTHR23153: ; SSF143503:	NA	Proteolysis	other localisation
Ec-01_001410	Citrate transporter-like domain	GO:0016020;GO:0055085;GO:0016021;GO:0006814;GO:0005215	CYTOPLASMIC_DOMAIN: Region of a membrane-bound protein predicted to be outside the membrane, in the cytoplasm.; PTHR10283: ; NON_CYTOPLASMIC_DOMAIN: Region of a membrane-bound protein predicted to be outside the membrane, in the extracellular region; IPR004680: Citrate transporter-like domain; TMhelix: Region of a membrane-bound protein predicted to be embedded in the membrane.; IPR001898: Sodium…	NA	Cytoskeleton and flagella	signal peptide
Ec-01_001420	Uncharacterised domain DM10	n/a;n/a;n/a	IPR010554: Protein of unknown function DUF1126; IPR006602: Uncharacterised domain DM10; PTHR12086:	NA	Unknown	other localisation
Ec-01_001430	EF-hand domain pair	GO:0005509	IPR011992: EF-hand domain pair; IPR002048: EF-hand domain; SSF47473:	NA	Cellular regulation and signalling	other localisation
Ec-01_001440	hypothetical protein	n/a;n/a;n/a	CYTOPLASMIC_DOMAIN: Region of a membrane-bound protein predicted to be outside the membrane, in the cytoplasm.; NON_CYTOPLASMIC_DOMAIN: Region of a membrane-bound protein predicted to be outside the membrane, in the extracellular region; TMhelix: Region of a membrane-bound protein predicted to be embedded in the membrane.; Coil: ; TRANSMEMBRANE: Region of a membrane-bound protein predicted to be …	NA	Unknown	signal anchor
Ec-01_001450	ferredoxin-NADP oxidoreductase	GO:0055114;GO:0016491	IPR017927: Ferredoxin reductase-type FAD-binding domain; TMhelix: Region of a membrane-bound protein predicted to be embedded in the membrane.; SIGNAL_PEPTIDE_N_REGION: N-terminal region of a signal peptide.; G3DSA:2.40.30.10: ; SignalP-TM: ; NON_CYTOPLASMIC_DOMAIN: Region of a membrane-bound protein predicted to be outside the membrane, in the extracellular region; IPR001433: Oxidoreductase FAD/…	KOG1158	Metabolism	chloroplast
Ec-01_001460	villin	GO:0003779	SSF55753: ; IPR007122: Villin/Gelsolin; IPR011993: PH domain-like; IPR029006: ADF-H/Gelsolin-like domain; PTHR11977:SF16: ; IPR007123: Gelsolin-like domain; IPR001849: Pleckstrin homology domain	KOG0443	Cytoskeleton and flagella	other localisation
Ec-01_001470	expressed unknown protein	n/a;n/a;n/a	NA	NA	Unknown	other localisation
Ec-01_001480	Protein phosphatase 2C (PP2C)-like domain	GO:0004672;GO:0006468;GO:0003824	IPR001932: PPM-type phosphatase domain; IPR002290: Serine/threonine/dual specificity protein kinase, catalytic domain; SIGNAL_PEPTIDE: Signal peptide region; G3DSA:3.30.200.20: ; SIGNAL_PEPTIDE_N_REGION: N-terminal region of a signal peptide.; IPR008271: Serine/threonine-protein kinase, active site; IPR011009: Protein kinase-like domain; SIGNAL_PEPTIDE_C_REGION: C-terminal region of a signal pept…	NA	Cellular regulation and signalling	signal peptide
Ec-01_001490	Hypothetical protein	n/a;n/a;n/a	NA	NA	Unknown	other localisation
Ec-01_001510	Resolvase, holliday junction-type, YqgF-like	GO:0031564;GO:0006281;GO:0006974;GO:0005737;GO:0006310;GO:0016788	SIGNAL_PEPTIDE: Signal peptide region; SIGNAL_PEPTIDE_N_REGION: N-terminal region of a signal peptide.; SIGNAL_PEPTIDE_C_REGION: C-terminal region of a signal peptide.; SignalP-TM: ; IPR006641: YqgF/RNase H-like domain; NON_CYTOPLASMIC_DOMAIN: Region of a membrane-bound protein predicted to be outside the membrane, in the extracellular region; IPR012337: Ribonuclease H-like domain; SIGNAL_PEPTIDE…	NA	DNA or chromatin modification	mitochondrion
Ec-01_001520	Armadillo-like helical	GO:0005488	IPR011989: Armadillo-like helical; IPR016024: Armadillo-type fold	NA	Cellular regulation and signalling	other localisation
Ec-01_001530	expressed unknown protein	n/a;n/a;n/a	NON_CYTOPLASMIC_DOMAIN: Region of a membrane-bound protein predicted to be outside the membrane, in the extracellular region; SIGNAL_PEPTIDE: Signal peptide region; SignalP-noTM: ; SIGNAL_PEPTIDE_N_REGION: N-terminal region of a signal peptide.; SIGNAL_PEPTIDE_H_REGION: Hydrophobic region of a signal peptide.; SIGNAL_PEPTIDE_C_REGION: C-terminal region of a signal peptide.; SignalP-TM:	NA	Unknown	signal peptide
Ec-01_001540	Armadillo-like helical	GO:0005488	IPR011989: Armadillo-like helical; IPR016024: Armadillo-type fold	NA	Cellular regulation and signalling	other localisation
Ec-01_001550	SNF2-related, winged helix-turn-helix DNA-binding and zinc finger domain protein	GO:0003677;GO:0005524	NA	NA	DNA or chromatin modification	other localisation
Ec-01_001560	long chain acyl-coA synthetase	GO:0008152;GO:0003824	G3DSA:3.40.50.980: ; IPR020845: AMP-binding, conserved site; PTHR24096: ; IPR000873: AMP-dependent synthetase/ligase; G3DSA:2.30.38.10: ; SSF56801:	KOG1256	Metabolism	other localisation
Ec-01_001570	expressed unknown protein	GO:0005515;n/a	PF13424: Tetratricopeptide repeat; PTHR19959: ; IPR013105: Tetratricopeptide repeat 2; IPR011990: Tetratricopeptide-like helical domain; IPR013026: Tetratricopeptide repeat-containing domain; IPR019734: Tetratricopeptide repeat	NA	Unknown	other localisation
Ec-01_001580	Hypothetical protein	n/a;n/a;n/a	NA	NA	Unknown	nd
Ec-01_001590	hypothetical protein	n/a;n/a;n/a	NA	NA	Unknown	other localisation
Ec-01_001600	Guanosine polyphosphate pyrophosphohydrolases/synthetases	GO:0015969	SSF109604: ; PTHR21262: ; PF13328: HD domain; IPR022796: Chlorophyll A-B binding protein; IPR012675: Beta-grasp domain; SSF81301: ; IPR023329: Chlorophyll a/b binding protein domain; IPR007685: RelA/SpoT; CYTOPLASMIC_DOMAIN: Region of a membrane-bound protein predicted to be outside the membrane, in the cytoplasm.; NON_CYTOPLASMIC_DOMAIN: Region of a membrane-bound protein predicted to be outside…	KOG1157	Metabolism	other localisation
Ec-01_001610	Serine O-acetyltransferase, incomplete	GO:0009001;GO:0006535;GO:0005737	PTHR23416: ; IPR011004: Trimeric LpxA-like; IPR001451: Bacterial transferase hexapeptide repeat; IPR010493: Serine acetyltransferase, N-terminal; G3DSA:1.10.3130.10: ; G3DSA:2.160.10.10:	KOG4750	Metabolism	other localisation
Ec-01_001620	Tetratricopeptide-like helical domain	GO:0005515	SSF48452: ; IPR000744: NSF attachment protein; IPR011990: Tetratricopeptide-like helical domain; PF14938: Soluble NSF attachment protein, SNAP	NA	Protein binding or modification	other localisation
Ec-01_001630	Helicase-associated domain	GO:0004386	IPR007502: Helicase-associated domain; IPR011545: DEAD/DEAH box helicase domain; IPR011709: Domain of unknown function DUF1605; IPR027417: P-loop containing nucleoside triphosphate hydrolase; PTHR18934: ; CYTOPLASMIC_DOMAIN: Region of a membrane-bound protein predicted to be outside the membrane, in the cytoplasm.; NON_CYTOPLASMIC_DOMAIN: Region of a membrane-bound protein predicted to be outside…	NA	RNA modification or binding	other localisation
Ec-01_001640	Hypothetical protein	n/a;n/a;n/a	NA	NA	Unknown	other localisation
Ec-01_001650	expressed unknown protein	n/a;n/a;n/a	SSF101447:	NA	Unknown	other localisation
Ec-01_001660	HECT	GO:0005515;GO:0004842	IPR010606: Mib-herc2; IPR001870: B30.2/SPRY domain; IPR013320: Concanavalin A-like lectin/glucanase domain; IPR003877: SPRY domain; PTHR11254: ; IPR015940: Ubiquitin-associated/translation elongation factor EF1B, N-terminal, eukaryote; G3DSA:1.10.8.10: ; SSF159034: ; Coil: ; IPR000569: HECT; IPR009060: UBA-like	NA	Proteolysis	other localisation
Ec-01_001680	NYN domain, limkain-b1-type	n/a;n/a;n/a	SIGNAL_PEPTIDE: Signal peptide region; SIGNAL_PEPTIDE_N_REGION: N-terminal region of a signal peptide.; SIGNAL_PEPTIDE_C_REGION: C-terminal region of a signal peptide.; IPR021139: NYN domain, limkain-b1-type; NON_CYTOPLASMIC_DOMAIN: Region of a membrane-bound protein predicted to be outside the membrane, in the extracellular region; SignalP-noTM: ; SIGNAL_PEPTIDE_H_REGION: Hydrophobic region of a…	NA	RNA modification or binding	chloroplast
Ec-01_001690	ARLX, novel ARF-like Ras superfamily GTPase	GO:0005525	IPR024156: Small GTPase superfamily, ARF type; PTHR11711: ; IPR027417: P-loop containing nucleoside triphosphate hydrolase; IPR006689: Small GTPase superfamily, ARF/SAR type	NA	Cellular regulation and signalling	other localisation
Ec-01_001700	Pyruvate/Phosphoenolpyruvate kinase-like domain	GO:0015940;GO:0003864;GO:0003824	IPR015813: Pyruvate/Phosphoenolpyruvate kinase-like domain; NON_CYTOPLASMIC_DOMAIN: Region of a membrane-bound protein predicted to be outside the membrane, in the extracellular region; IPR003700: Ketopantoate hydroxymethyltransferase; SIGNAL_PEPTIDE: Signal peptide region; SIGNAL_PEPTIDE_N_REGION: N-terminal region of a signal peptide.; Coil: ; SIGNAL_PEPTIDE_H_REGION: Hydrophobic region of a si…	NA	Metabolism	mitochondrion
Ec-01_001710	TUP1-like enhancer of split	GO:0005634;GO:0006355;GO:0006351;GO:0016568	IPR011494: TUP1-like enhancer of split; IPR017986: WD40-repeat-containing domain; IPR019775: WD40 repeat, conserved site; IPR019015: HIRA B motif; IPR015943: WD40/YVTN repeat-like-containing domain; IPR001680: WD40 repeat; Coil: ; IPR031120: WD repeat HIR1	NA	DNA or chromatin modification	other localisation
Ec-01_001720	Putative S-adenosyl-L-methionine-dependent methyltransferase MidA	n/a;n/a;n/a	IPR003788: Putative S-adenosyl-L-methionine-dependent methyltransferase MidA; IPR029063: S-adenosyl-L-methionine-dependent methyltransferase	NA	Metabolism	mitochondrion
Ec-01_001730	expressed unknown protein	n/a;n/a;n/a	NON_CYTOPLASMIC_DOMAIN: Region of a membrane-bound protein predicted to be outside the membrane, in the extracellular region; SignalP-noTM: ; TMhelix: Region of a membrane-bound protein predicted to be embedded in the membrane.; SIGNAL_PEPTIDE: Signal peptide region; SIGNAL_PEPTIDE_N_REGION: N-terminal region of a signal peptide.; SIGNAL_PEPTIDE_H_REGION: Hydrophobic region of a signal peptide.; …	NA	Unknown	chloroplast
Ec-01_001740	Phytanoyl-CoA dioxygenase	n/a;n/a;n/a	PTHR20883: ; SSF51197: ; IPR008775: Phytanoyl-CoA dioxygenase; G3DSA:2.60.120.620:	NA	Metabolism	other localisation
Ec-01_001750	P-loop containing nucleoside triphosphate hydrolase	GO:0005524	IPR003959: ATPase, AAA-type, core; IPR003593: AAA+ ATPase domain; IPR003960: ATPase, AAA-type, conserved site; G3DSA:1.10.8.60: ; IPR027417: P-loop containing nucleoside triphosphate hydrolase; Coil: ; PTHR23074:	NA	Metabolism	other localisation
Ec-01_001770	Armadillo-like helical	GO:0005488	IPR011989: Armadillo-like helical; PTHR10527: ; IPR016024: Armadillo-type fold	NA	Cellular regulation and signalling	other localisation
Ec-01_001780	Armadillo-type fold	GO:0005488	IPR011989: Armadillo-like helical; SIGNAL_PEPTIDE: Signal peptide region; SIGNAL_PEPTIDE_N_REGION: N-terminal region of a signal peptide.; SIGNAL_PEPTIDE_C_REGION: C-terminal region of a signal peptide.; NON_CYTOPLASMIC_DOMAIN: Region of a membrane-bound protein predicted to be outside the membrane, in the extracellular region; PTHR10527: ; IPR016024: Armadillo-type fold; SIGNAL_PEPTIDE_H_REGION:…	NA	Cellular regulation and signalling	other localisation
Ec-01_001810	hypothetical protein	n/a;n/a;n/a	NA	NA	Unknown	other localisation
Ec-01_001820	hypothetical protein	n/a;n/a;n/a	Coil:	NA	Unknown	other localisation
Ec-01_001830	P-loop containing nucleoside triphosphate hydrolase	n/a;n/a;n/a	PF13207: AAA domain; IPR027417: P-loop containing nucleoside triphosphate hydrolase	NA	Metabolism	other localisation
Ec-01_001840	conserved unknown protein	n/a;n/a;n/a	NON_CYTOPLASMIC_DOMAIN: Region of a membrane-bound protein predicted to be outside the membrane, in the extracellular region; SIGNAL_PEPTIDE: Signal peptide region; SIGNAL_PEPTIDE_N_REGION: N-terminal region of a signal peptide.; SIGNAL_PEPTIDE_H_REGION: Hydrophobic region of a signal peptide.; SIGNAL_PEPTIDE_C_REGION: C-terminal region of a signal peptide.	NA	Unknown	mitochondrion
Ec-01_001860	conserved unknown protein	NA	TMhelix: Region of a membrane-bound protein predicted to be embedded in the membrane.; SIGNAL_PEPTIDE: Signal peptide region; SIGNAL_PEPTIDE_N_REGION: N-terminal region of a signal peptide.; PTHR13547: ; SignalP-TM: ; SIGNAL_PEPTIDE_C_REGION: C-terminal region of a signal peptide.; NON_CYTOPLASMIC_DOMAIN: Region of a membrane-bound protein predicted to be outside the membrane, in the extracellula…	NA	Unknown	signal anchor
Ec-01_001870	argininosuccinate synthetase	GO:0005524;GO:0004055;GO:0006526	PTHR11587: ; SSF69864: ; IPR018223: Argininosuccinate synthase, conserved site; IPR001518: Argininosuccinate synthase; IPR014729: Rossmann-like alpha/beta/alpha sandwich fold; SSF52402: ; G3DSA:1.20.5.470: ; IPR023434: Argininosuccinate synthase, type 1 subfamily; IPR024074: Argininosuccinate synthetase, catalytic/multimerisation domain body	NA	Metabolism	other localisation
Ec-01_001880	Uncharacterised protein family Cys-rich	n/a;n/a;n/a	IPR006461: PLAC8 motif-containing protein; PTHR15907:	NA	Unknown	other localisation
Ec-01_001890	Gar1 subunit of the H/ACA ribonucleoprotein complex	GO:0042254;GO:0001522;GO:0031429	NA	NA	RNA modification or binding	other localisation
Ec-01_001900	Arf GTPase activating protein	GO:0032312;GO:0008060;GO:0008270;GO:0005096	NA	NA	Cellular regulation and signalling	other localisation
Ec-01_001910	hypothetical protein	n/a;n/a;n/a	mobidb-lite: consensus disorder prediction	NA	Unknown	other localisation
Ec-01_001920	hypothetical protein	n/a;n/a;n/a	Coil:	NA	Unknown	other localisation
Ec-01_001930	hypothetical protein	n/a;n/a;n/a	NA	NA	Unknown	other localisation
Ec-01_001940	FUN14	n/a;n/a;n/a	CYTOPLASMIC_DOMAIN: Region of a membrane-bound protein predicted to be outside the membrane, in the cytoplasm.; NON_CYTOPLASMIC_DOMAIN: Region of a membrane-bound protein predicted to be outside the membrane, in the extracellular region; IPR007014: FUN14; TMhelix: Region of a membrane-bound protein predicted to be embedded in the membrane.; PTHR21346: ; TRANSMEMBRANE: Region of a membrane-bound p…	NA	Autophagy	other localisation
Ec-01_001950	CobW/HypB/UreG domain	n/a;n/a;n/a	IPR004400: Urease accessory protein UreG; IPR027417: P-loop containing nucleoside triphosphate hydrolase; IPR003495: CobW/HypB/UreG domain	NA	Metabolism	other localisation
Ec-01_001960	conserved unknown protein	n/a;n/a;n/a	NA	NA	Unknown	other localisation
Ec-01_001970	Nucleotide-binding alpha-beta plait domain	GO:0000166	SSF54928: ; PTHR24012: ; PF14259: RNA recognition motif (a.k.a. RRM, RBD, or RNP domain); IPR000504: RNA recognition motif domain; IPR012677: Nucleotide-binding alpha-beta plait domain	NA	Metabolism	mitochondrion
Ec-01_001990	Protein of unknown function DUF1350	NA	NON_CYTOPLASMIC_DOMAIN: Region of a membrane-bound protein predicted to be outside the membrane, in the extracellular region; IPR029058: Alpha/Beta hydrolase fold; SIGNAL_PEPTIDE: Signal peptide region; SIGNAL_PEPTIDE_N_REGION: N-terminal region of a signal peptide.; SIGNAL_PEPTIDE_H_REGION: Hydrophobic region of a signal peptide.; IPR010765: Protein of unknown function DUF1350; SIGNAL_PEPTIDE_C_…	NA	Unknown	signal peptide
Ec-01_002000	Ankyrin repeat-containing domain	n/a;n/a;n/a	IPR020683: Ankyrin repeat-containing domain; PTHR24198: ; PF13857: Ankyrin repeats (many copies); IPR011992: EF-hand domain pair; IPR002048: EF-hand domain; IPR002110: Ankyrin repeat	NA	Membrane function and transporters	other localisation
Ec-01_002020	Six-hairpin glycosidase	GO:0003824	IPR024705: Spermatogenesis-associated protein 20; IPR012341: Six-hairpin glycosidase; IPR004879: Domain of unknown function DUF255; IPR008928: Six-hairpin glycosidase-like; IPR012336: Thioredoxin-like fold; PTHR12145:	NA	Metabolism	other localisation
Ec-01_002030	F-box domain	GO:0005515	IPR016135: Ubiquitin-conjugating enzyme/RWD-like; IPR001810: F-box domain; G3DSA:1.20.1280.50: ; SM00212: ; IPR000608: Ubiquitin-conjugating enzyme E2; Coil:	NA	Proteolysis	other localisation
Ec-01_002040	Rrp46 is a component of the exosome 3'->5' exoribonuclease complex, a complex that degrades mRNAs.	GO:0000175;GO:0003723;GO:0006396	PTHR11953: ; IPR015847: Exoribonuclease, phosphorolytic domain 2; IPR001247: Exoribonuclease, phosphorolytic domain 1; IPR020568: Ribosomal protein S5 domain 2-type fold; IPR027408: PNPase/RNase PH domain	NA	RNA modification or binding	other localisation
Ec-01_002050	alternative oxidase, mitochondrial protein	GO:0009916;GO:0055114	TMhelix: Region of a membrane-bound protein predicted to be embedded in the membrane.; IPR002680: Alternative oxidase; SIGNAL_PEPTIDE_N_REGION: N-terminal region of a signal peptide.; PTHR31803: ; SignalP-TM: ; NON_CYTOPLASMIC_DOMAIN: Region of a membrane-bound protein predicted to be outside the membrane, in the extracellular region; IPR018490: Cyclic nucleotide-binding-like; SIGNAL_PEPTIDE_H_RE…	NA	Metabolism	signal peptide
Ec-01_002060	expressed unknown protein	n/a;n/a;n/a	NA	NA	Unknown	other localisation
Ec-01_002070	UBX domain	GO:0005515	TMhelix: Region of a membrane-bound protein predicted to be embedded in the membrane.; PTHR23322: ; CYTOPLASMIC_DOMAIN: Region of a membrane-bound protein predicted to be outside the membrane, in the cytoplasm.; G3DSA:3.10.20.90: ; NON_CYTOPLASMIC_DOMAIN: Region of a membrane-bound protein predicted to be outside the membrane, in the extracellular region; IPR001012: UBX domain; IPR029071: Ubiquit…	NA	Proteolysis	signal peptide
Ec-01_002080	RNA-binding domain, S1, IF1 type	GO:0006413;GO:0003723;GO:0003743	PTHR21641: ; IPR012340: Nucleic acid-binding, OB-fold; IPR006196: RNA-binding domain, S1, IF1 type; IPR001253: Translation initiation factor 1A (eIF-1A)	NA	RNA modification or binding	other localisation
Ec-01_002090	expressed unknown protein	n/a;n/a;n/a	TMhelix: Region of a membrane-bound protein predicted to be embedded in the membrane.; SIGNAL_PEPTIDE: Signal peptide region; SIGNAL_PEPTIDE_N_REGION: N-terminal region of a signal peptide.; SignalP-TM: ; SIGNAL_PEPTIDE_C_REGION: C-terminal region of a signal peptide.; CYTOPLASMIC_DOMAIN: Region of a membrane-bound protein predicted to be outside the membrane, in the cytoplasm.; NON_CYTOPLASMIC_D…	NA	Unknown	chloroplast
Ec-01_002100	expressed unknown protein	n/a;n/a;n/a	NA	NA	Unknown	other localisation
Ec-01_002110	SAP domain	GO:0003676	IPR003034: SAP domain; PTHR14127:	NA	Protein binding or modification	other localisation
Ec-01_002120	EsV-1-199	n/a;GO:0005515	IPR020683: Ankyrin repeat-containing domain; PTHR24198: ; IPR002110: Ankyrin repeat	NA	Membrane function and transporters	other localisation
Ec-01_002130	SOUL haem-binding protein	n/a;n/a;n/a	CYTOPLASMIC_DOMAIN: Region of a membrane-bound protein predicted to be outside the membrane, in the cytoplasm.; NON_CYTOPLASMIC_DOMAIN: Region of a membrane-bound protein predicted to be outside the membrane, in the extracellular region; IPR011256: Regulatory factor, effector binding domain; TMhelix: Region of a membrane-bound protein predicted to be embedded in the membrane.; IPR006917: SOUL hae…	NA	Metabolism	other localisation
Ec-01_002150	Alpha/Beta hydrolase fold	n/a;n/a;n/a	CYTOPLASMIC_DOMAIN: Region of a membrane-bound protein predicted to be outside the membrane, in the cytoplasm.; NON_CYTOPLASMIC_DOMAIN: Region of a membrane-bound protein predicted to be outside the membrane, in the extracellular region; IPR029058: Alpha/Beta hydrolase fold; TMhelix: Region of a membrane-bound protein predicted to be embedded in the membrane.; IPR000073: Alpha/beta hydrolase fold…	NA	Metabolism	signal peptide
Ec-01_002160	Hypothetical protein	n/a;n/a;n/a	NA	NA	Unknown	other localisation
Ec-01_002170	EsV-1-1	n/a;GO:0005515	IPR020683: Ankyrin repeat-containing domain; IPR002110: Ankyrin repeat; PTHR24188:	NA	Transposon or viral gene	other localisation
Ec-01_002180	Alpha/Beta hydrolase fold	GO:0004091;n/a	CYTOPLASMIC_DOMAIN: Region of a membrane-bound protein predicted to be outside the membrane, in the cytoplasm.; NON_CYTOPLASMIC_DOMAIN: Region of a membrane-bound protein predicted to be outside the membrane, in the extracellular region; IPR029058: Alpha/Beta hydrolase fold; IPR012020: AB-hydrolase ABHD1/2/3; PTHR10794: ; IPR000073: Alpha/beta hydrolase fold-1; TRANSMEMBRANE: Region of a membrane…	NA	Metabolism	other localisation
Ec-01_002190	JAB1/MPN/MOV34 metalloenzyme domain	GO:0005515	IPR000555: JAB1/MPN/MOV34 metalloenzyme domain; G3DSA:3.40.140.10: ; SSF102712: ; SIGNAL_PEPTIDE: Signal peptide region; SIGNAL_PEPTIDE_N_REGION: N-terminal region of a signal peptide.; SIGNAL_PEPTIDE_C_REGION: C-terminal region of a signal peptide.; NON_CYTOPLASMIC_DOMAIN: Region of a membrane-bound protein predicted to be outside the membrane, in the extracellular region; PTHR10410: ; Coil: ; S…	NA	Metabolism	other localisation
Ec-01_002200	Apoptosis inducing factor	GO:0050660;GO:0055114;GO:0016491	IPR000103: Pyridine nucleotide-disulphide oxidoreductase, class-II; PR00368: FAD-dependent pyridine nucleotide reductase signature; G3DSA:3.50.50.60: ; PTHR22915: ; IPR023753: Pyridine nucleotide-disulphide oxidoreductase, FAD/NAD(P)-binding domain; SSF51905:	NA	Cellular regulation and signalling	other localisation
Ec-01_002210	conserved unknown protein	n/a;n/a;n/a	NA	NA	Unknown	other localisation
Ec-01_002220	expressed unknown protein	n/a;n/a;n/a	NA	NA	Unknown	other localisation
Ec-01_002230	conserved unknown protein	n/a;n/a;n/a	NA	NA	Unknown	other localisation
Ec-01_002240	conserved unknown protein	n/a;n/a;n/a	NON_CYTOPLASMIC_DOMAIN: Region of a membrane-bound protein predicted to be outside the membrane, in the extracellular region; SIGNAL_PEPTIDE: Signal peptide region; SIGNAL_PEPTIDE_N_REGION: N-terminal region of a signal peptide.; SIGNAL_PEPTIDE_H_REGION: Hydrophobic region of a signal peptide.; SignalP-TM: ; SIGNAL_PEPTIDE_C_REGION: C-terminal region of a signal peptide.	NA	Unknown	other localisation
Ec-01_002250	carboxyvinyl-carboxyphosphonate phosphorylmutase	GO:0008152;GO:0003824	SIGNAL_PEPTIDE: Signal peptide region; SIGNAL_PEPTIDE_N_REGION: N-terminal region of a signal peptide.; SIGNAL_PEPTIDE_C_REGION: C-terminal region of a signal peptide.; SignalP-TM: ; IPR015813: Pyruvate/Phosphoenolpyruvate kinase-like domain; NON_CYTOPLASMIC_DOMAIN: Region of a membrane-bound protein predicted to be outside the membrane, in the extracellular region; SignalP-noTM: ; PTHR21631: ; P…	NA	Metabolism	signal peptide
Ec-01_002260	conserved unknown protein	n/a;n/a;n/a	NON_CYTOPLASMIC_DOMAIN: Region of a membrane-bound protein predicted to be outside the membrane, in the extracellular region; TMhelix: Region of a membrane-bound protein predicted to be embedded in the membrane.; SIGNAL_PEPTIDE: Signal peptide region; SIGNAL_PEPTIDE_N_REGION: N-terminal region of a signal peptide.; SIGNAL_PEPTIDE_H_REGION: Hydrophobic region of a signal peptide.; SignalP-TM: ; SI…	NA	Unknown	signal peptide
Ec-01_002270	expressed unknown protein	n/a;n/a;n/a	SignalP-TM:	NA	Unknown	other localisation
Ec-01_002280	hypothetical protein	n/a;n/a;n/a	Coil:	NA	Unknown	other localisation
Ec-01_002290	Transcription elongation factor 1	n/a;n/a;n/a	IPR007808: Transcription elongation factor 1; SSF57783:	NA	Transcription	other localisation
Ec-01_002300	Prohibitin complex subunit 1	NA	IPR000163: Prohibitin; SSF117892: ; IPR001107: Band 7 protein	KOG3083	Transcription	other localisation
Ec-01_002310	Armadillo-type fold	GO:0005488	IPR011989: Armadillo-like helical; PTHR12663: ; IPR016024: Armadillo-type fold	NA	Cellular regulation and signalling	other localisation
Ec-01_002320	expressed unknown protein	n/a;n/a;n/a	NA	NA	Unknown	other localisation
Ec-01_002330	Methyltransferase type 11	GO:0008152;GO:0008168	IPR029063: S-adenosyl-L-methionine-dependent methyltransferase; SIGNAL_PEPTIDE: Signal peptide region; SIGNAL_PEPTIDE_N_REGION: N-terminal region of a signal peptide.; PTHR10108: ; SIGNAL_PEPTIDE_C_REGION: C-terminal region of a signal peptide.; SignalP-TM: ; NON_CYTOPLASMIC_DOMAIN: Region of a membrane-bound protein predicted to be outside the membrane, in the extracellular region; SignalP-noTM:…	NA	Metabolism	signal peptide
Ec-01_002340	AhpD-like	n/a;GO:0055114;GO:0051920	IPR029032: AhpD-like; IPR003779: Carboxymuconolactone decarboxylase-like; Coil: ; IPR004675: Alkylhydroperoxidase AhpD core	NA	Metabolism	other localisation
Ec-01_002350	S-adenosyl-L-methionine-dependent methyltransferase	n/a;n/a;n/a	CYTOPLASMIC_DOMAIN: Region of a membrane-bound protein predicted to be outside the membrane, in the cytoplasm.; NON_CYTOPLASMIC_DOMAIN: Region of a membrane-bound protein predicted to be outside the membrane, in the extracellular region; PTHR12787:SF0: ; IPR029063: S-adenosyl-L-methionine-dependent methyltransferase; IPR007823: Methyltransferase-related; TRANSMEMBRANE: Region of a membrane-bound …	NA	Metabolism	other localisation
Ec-01_002360	conserved unknown protein	n/a;n/a;n/a	NA	NA	Unknown	other localisation
Ec-01_002370	Hydrolase, carbon-nitrogen family protein	GO:0006807;GO:0016810	IPR003010: Carbon-nitrogen hydrolase; PTHR23088: ; SIGNAL_PEPTIDE: Signal peptide region; SIGNAL_PEPTIDE_N_REGION: N-terminal region of a signal peptide.; SignalP-TM: ; SIGNAL_PEPTIDE_C_REGION: C-terminal region of a signal peptide.; NON_CYTOPLASMIC_DOMAIN: Region of a membrane-bound protein predicted to be outside the membrane, in the extracellular region; SignalP-noTM: ; IPR001110: Uncharacteri…	KOG0806	Metabolism	chloroplast
Ec-01_002380	Short-chain dehydrogenase/reductase SDR	GO:0008152;GO:0016491	SSF51735: ; SIGNAL_PEPTIDE: Signal peptide region; SIGNAL_PEPTIDE_N_REGION: N-terminal region of a signal peptide.; PTHR24320: ; IPR002347: Glucose/ribitol dehydrogenase; IPR002198: Short-chain dehydrogenase/reductase SDR; SignalP-TM: ; SIGNAL_PEPTIDE_C_REGION: C-terminal region of a signal peptide.; NON_CYTOPLASMIC_DOMAIN: Region of a membrane-bound protein predicted to be outside the membrane, …	NA	Metabolism	signal peptide
Ec-01_002390	hypothetical protein	n/a;n/a;n/a	NA	NA	Unknown	other localisation
Ec-01_002400	LsmAD domain	n/a;n/a;n/a	IPR009604: LsmAD domain; IPR025852: Ataxin 2, SM domain; PTHR12854:SF7: ; PTHR12854:	NA	Unknown	other localisation
Ec-01_002410	HAD-like domain	GO:0008270;GO:0016491;GO:0055114	SSF51735: ; SIGNAL_PEPTIDE: Signal peptide region; SIGNAL_PEPTIDE_N_REGION: N-terminal region of a signal peptide.; IPR013149: Alcohol dehydrogenase, C-terminal; IPR023214: HAD-like domain; SIGNAL_PEPTIDE_C_REGION: C-terminal region of a signal peptide.; NON_CYTOPLASMIC_DOMAIN: Region of a membrane-bound protein predicted to be outside the membrane, in the extracellular region; IPR011032: GroES (…	NA	Metabolism	signal peptide
Ec-01_002420	Serine/threonine/dual specificity protein kinase, catalytic domain	GO:0004672;GO:0005524;GO:0006468	PTHR24349: ; IPR002290: Serine/threonine/dual specificity protein kinase, catalytic domain; SIGNAL_PEPTIDE: Signal peptide region; G3DSA:3.30.200.20: ; SIGNAL_PEPTIDE_N_REGION: N-terminal region of a signal peptide.; IPR011009: Protein kinase-like domain; IPR008271: Serine/threonine-protein kinase, active site; SIGNAL_PEPTIDE_C_REGION: C-terminal region of a signal peptide.; NON_CYTOPLASMIC_DOMAI…	NA	Cellular regulation and signalling	mitochondrion
Ec-01_002430	Acyl-CoA N-acyltransferase	n/a;n/a;n/a	IPR016181: Acyl-CoA N-acyltransferase	NA	Metabolism	other localisation
Ec-01_002440	expressed unknown protein	n/a;n/a;n/a	TMhelix: Region of a membrane-bound protein predicted to be embedded in the membrane.; SIGNAL_PEPTIDE: Signal peptide region; SIGNAL_PEPTIDE_N_REGION: N-terminal region of a signal peptide.; IPR018962: Domain of unknown function DUF1995; SIGNAL_PEPTIDE_C_REGION: C-terminal region of a signal peptide.; CYTOPLASMIC_DOMAIN: Region of a membrane-bound protein predicted to be outside the membrane, in …	NA	Unknown	mitochondrion
Ec-01_002445	hypothetical protein	NA	mobidb-lite: consensus disorder prediction	NA	Unknown	other localisation
Ec-01_002450	ADP-ribosylation/Crystallin J1	n/a;n/a;n/a	IPR005502: ADP-ribosylation/Crystallin J1; PTHR16222:	NA	Metabolism	other localisation
Ec-01_002460	heat shock protein Hsp90	GO:0005524;GO:0006457;GO:0006950;GO:0051082	PF13589: Histidine kinase-, DNA gyrase B-, and HSP90-like ATPase; IPR001404: Heat shock protein Hsp90 family; IPR020575: Heat shock protein Hsp90, N-terminal; IPR003594: Histidine kinase-like ATPase, C-terminal domain; SSF110942: ; SignalP-TM: ; IPR019805: Heat shock protein Hsp90, conserved site; IPR020568: Ribosomal protein S5 domain 2-type fold	NA	Stress response	mitochondrion
Ec-01_002470	expressed unknown protein	n/a;n/a;n/a	NON_CYTOPLASMIC_DOMAIN: Region of a membrane-bound protein predicted to be outside the membrane, in the extracellular region; SIGNAL_PEPTIDE: Signal peptide region; SignalP-noTM: ; SIGNAL_PEPTIDE_N_REGION: N-terminal region of a signal peptide.; SIGNAL_PEPTIDE_H_REGION: Hydrophobic region of a signal peptide.; SignalP-TM: ; SIGNAL_PEPTIDE_C_REGION: C-terminal region of a signal peptide.	NA	Unknown	signal peptide
Ec-01_002490	hypothetical protein	n/a;n/a;n/a	NON_CYTOPLASMIC_DOMAIN: Region of a membrane-bound protein predicted to be outside the membrane, in the extracellular region; SIGNAL_PEPTIDE: Signal peptide region; SIGNAL_PEPTIDE_H_REGION: Hydrophobic region of a signal peptide.; SIGNAL_PEPTIDE_C_REGION: C-terminal region of a signal peptide.	NA	Unknown	other localisation
Ec-01_002500	LRR-GTPase of the ROCO family	GO:0007264;GO:0005622;GO:0005525	G3DSA:3.80.10.10: ; SSF52058: ; IPR027417: P-loop containing nucleoside triphosphate hydrolase; IPR020859: ROC GTPase; IPR001611: Leucine-rich repeat; IPR025875: Leucine rich repeat 4; IPR013684: Mitochondrial Rho-like; CYTOPLASMIC_DOMAIN: Region of a membrane-bound protein predicted to be outside the membrane, in the cytoplasm.; IPR001806: Small GTPase superfamily; NON_CYTOPLASMIC_DOMAIN: Region…	NA	Cellular regulation and signalling	other localisation
Ec-01_002510	Hypothetical protein	n/a;n/a;n/a	NA	NA	Unknown	nd
Ec-01_002520	conserved unknown protein	n/a;n/a;n/a	CYTOPLASMIC_DOMAIN: Region of a membrane-bound protein predicted to be outside the membrane, in the cytoplasm.; NON_CYTOPLASMIC_DOMAIN: Region of a membrane-bound protein predicted to be outside the membrane, in the extracellular region; TMhelix: Region of a membrane-bound protein predicted to be embedded in the membrane.; Coil: ; TRANSMEMBRANE: Region of a membrane-bound protein predicted to be …	NA	Unknown	signal peptide
Ec-01_002530	Proliferating cell nuclear antigen, PCNA, C-terminal	GO:0003677;GO:0006275	G3DSA:3.70.10.10: ; IPR000730: Proliferating cell nuclear antigen, PCNA; IPR022649: Proliferating cell nuclear antigen, PCNA, C-terminal; SSF55979: ; IPR022648: Proliferating cell nuclear antigen, PCNA, N-terminal	NA	DNA or chromatin modification	other localisation
Ec-01_002540	ubiquinol cytochrome c reductase cytochrome c1 prec (ISS)	GO:0009055;GO:0020037;GO:0005506	IPR002326: Cytochrome c1; IPR021157: Cytochrome c1, transmembrane anchor, C-terminal; SIGNAL_PEPTIDE: Signal peptide region; SIGNAL_PEPTIDE_N_REGION: N-terminal region of a signal peptide.; G3DSA:1.20.5.100: ; SignalP-TM: ; SIGNAL_PEPTIDE_C_REGION: C-terminal region of a signal peptide.; CYTOPLASMIC_DOMAIN: Region of a membrane-bound protein predicted to be outside the membrane, in the cytoplasm.…	KOG3052	Metabolism	mitochondrion
Ec-01_002550	expressed unknown protein	n/a;n/a;n/a	SIGNAL_PEPTIDE: Signal peptide region; PS51257: Prokaryotic membrane lipoprotein lipid attachment site profile.; SIGNAL_PEPTIDE_N_REGION: N-terminal region of a signal peptide.; SIGNAL_PEPTIDE_C_REGION: C-terminal region of a signal peptide.; SignalP-TM: ; NON_CYTOPLASMIC_DOMAIN: Region of a membrane-bound protein predicted to be outside the membrane, in the extracellular region; SignalP-noTM: ; …	NA	Unknown	signal peptide
Ec-01_002570	conserved unknown protein	n/a;n/a;n/a	PTHR15885: ; Coil:	NA	Unknown	other localisation
Ec-01_002580	EGF-like calcium-binding domain	GO:0005509	TMhelix: Region of a membrane-bound protein predicted to be embedded in the membrane.; IPR000742: Epidermal growth factor-like domain; SIGNAL_PEPTIDE_N_REGION: N-terminal region of a signal peptide.; SignalP-TM: ; NON_CYTOPLASMIC_DOMAIN: Region of a membrane-bound protein predicted to be outside the membrane, in the extracellular region; IPR000152: EGF-type aspartate/asparagine hydroxylation site…	NA	Cellular regulation and signalling	signal peptide
Ec-01_002600	EamA domain	GO:0016020;GO:0016021	SIGNAL_PEPTIDE: Signal peptide region; SIGNAL_PEPTIDE_N_REGION: N-terminal region of a signal peptide.; SignalP-TM: ; SIGNAL_PEPTIDE_C_REGION: C-terminal region of a signal peptide.; SSF103481: ; CYTOPLASMIC_DOMAIN: Region of a membrane-bound protein predicted to be outside the membrane, in the cytoplasm.; PTHR12715: ; NON_CYTOPLASMIC_DOMAIN: Region of a membrane-bound protein predicted to be out…	NA	Membrane function and transporters	other localisation
Ec-01_002610	Zinc finger, RING/FYVE/PHD-type	GO:0005515;GO:0008270	IPR001841: Zinc finger, RING-type; IPR001965: Zinc finger, PHD-type; SSF54001: ; PTHR15242: ; IPR017923: Transcription factor IIS, N-terminal; SSF57850: ; IPR013083: Zinc finger, RING/FYVE/PHD-type; IPR011011: Zinc finger, FYVE/PHD-type; IPR019787: Zinc finger, PHD-finger	NA	Cellular regulation and signalling	other localisation
Ec-01_002620	hypothetical protein	GO:0000226;GO:0005874	Coil:	NA	Unknown	other localisation
Ec-01_002630	flagellar associated protein	GO:0006464	G3DSA:3.10.20.90: ; PF14772: Sperm tail; IPR029071: Ubiquitin-related domain; IPR000626: Ubiquitin-like; IPR029440: Dynein regulatory complex protein 1, C-terminal; Coil: ; PTHR21625:	NA	Cytoskeleton and flagella	other localisation
Ec-01_002640	expressed unknown protein	n/a;n/a;n/a	CYTOPLASMIC_DOMAIN: Region of a membrane-bound protein predicted to be outside the membrane, in the cytoplasm.; NON_CYTOPLASMIC_DOMAIN: Region of a membrane-bound protein predicted to be outside the membrane, in the extracellular region; TMhelix: Region of a membrane-bound protein predicted to be embedded in the membrane.; TRANSMEMBRANE: Region of a membrane-bound protein predicted to be embedded…	NA	Unknown	signal anchor
Ec-01_002650	Heat Shock transcription factor	GO:0005634;GO:0006355;GO:0043565;GO:0003700	NA	NA	Transcription	other localisation
Ec-01_002660	expressed unknown protein	n/a;n/a;n/a	SSF57845:	NA	Unknown	other localisation
Ec-01_002670	expressed unknown protein	n/a;n/a;n/a	NA	NA	Unknown	other localisation
Ec-01_002680	hypothetical protein	n/a;n/a;n/a	Coil:	NA	Unknown	other localisation
Ec-01_002690	Pleckstrin homology-like domain	n/a;n/a;n/a	IPR011993: Pleckstrin homology-like domain	NA	Cellular regulation and signalling	other localisation
Ec-01_002700	expressed unknown protein	n/a;n/a;n/a	CYTOPLASMIC_DOMAIN: Region of a membrane-bound protein predicted to be outside the membrane, in the cytoplasm.; NON_CYTOPLASMIC_DOMAIN: Region of a membrane-bound protein predicted to be outside the membrane, in the extracellular region; TMhelix: Region of a membrane-bound protein predicted to be embedded in the membrane.; SignalP-noTM: ; TRANSMEMBRANE: Region of a membrane-bound protein predicte…	NA	Unknown	chloroplast
Ec-01_002710	Alpha/Beta hydrolase fold	GO:0016787	CYTOPLASMIC_DOMAIN: Region of a membrane-bound protein predicted to be outside the membrane, in the cytoplasm.; PTHR12277: ; NON_CYTOPLASMIC_DOMAIN: Region of a membrane-bound protein predicted to be outside the membrane, in the extracellular region; IPR029059: Alpha/beta hydrolase fold-5; IPR029058: Alpha/Beta hydrolase fold; TMhelix: Region of a membrane-bound protein predicted to be embedded i…	NA	Metabolism	signal peptide
Ec-01_002720	ferredoxin nitrite reductase	GO:0016491;GO:0055114	IPR006066: Nitrite/sulphite reductase iron-sulphur/sirohaem-binding site; SSF56014: ; IPR006067: Nitrite/sulphite reductase 4Fe-4S domain; SIGNAL_PEPTIDE: Signal peptide region; SIGNAL_PEPTIDE_N_REGION: N-terminal region of a signal peptide.; IPR005117: Nitrite/Sulfite reductase ferredoxin-like domain; SIGNAL_PEPTIDE_C_REGION: C-terminal region of a signal peptide.; NON_CYTOPLASMIC_DOMAIN: Region…	NA	Metabolism	signal peptide
Ec-01_002730	hypothetical protein	n/a;n/a;n/a	CYTOPLASMIC_DOMAIN: Region of a membrane-bound protein predicted to be outside the membrane, in the cytoplasm.; NON_CYTOPLASMIC_DOMAIN: Region of a membrane-bound protein predicted to be outside the membrane, in the extracellular region; TMhelix: Region of a membrane-bound protein predicted to be embedded in the membrane.; TRANSMEMBRANE: Region of a membrane-bound protein predicted to be embedded…	NA	Unknown	signal peptide
Ec-01_002740	hypothetical protein	NA	IPR002885: Pentatricopeptide repeat; Coil: ; PTHR24015:	NA	Unknown	other localisation
Ec-01_002750	C2H2 zinc finger protein	GO:0003676;GO:0005622;GO:0008270	IPR015880: Zinc finger, C2H2-like; PTHR11538: ; PF13894: C2H2-type zinc finger; IPR007087: Zinc finger, C2H2; IPR019446: Domain of unknown function DUF2431	KOG1721	Transcription	other localisation
Ec-01_002770	AP endonuclease 1	GO:0004518;GO:0006281	IPR005135: Endonuclease/exonuclease/phosphatase; IPR004808: AP endonuclease 1; PTHR22748:SF1:	NA	DNA or chromatin modification	other localisation
Ec-01_002780	Aldolase-type TIM barrel	GO:0005975;GO:0003824	IPR013785: Aldolase-type TIM barrel; IPR018225: Transaldolase, active site; IPR004730: Transaldolase type 1; SSF51569: ; IPR001585: Transaldolase	NA	Metabolism	other localisation
Ec-01_002790	Poly(ADP-ribose) polymerase, catalytic domain	GO:0003950	PTHR14453: ; IPR004170: WWE domain; IPR012317: Poly(ADP-ribose) polymerase, catalytic domain; SSF117839: ; SSF56399:	NA	DNA or chromatin modification	other localisation
Ec-01_002800	Tyrosinase copper-binding domain	GO:0008152;GO:0016491	IPR008922: Uncharacterised domain, di-copper centre; IPR002227: Tyrosinase copper-binding domain; TMhelix: Region of a membrane-bound protein predicted to be embedded in the membrane.; SIGNAL_PEPTIDE: Signal peptide region; SIGNAL_PEPTIDE_N_REGION: N-terminal region of a signal peptide.; SIGNAL_PEPTIDE_C_REGION: C-terminal region of a signal peptide.; SignalP-TM: ; NON_CYTOPLASMIC_DOMAIN: Region …	NA	Metabolism	signal peptide
Ec-01_002810	xylulose kinase	GO:0016773;GO:0005975	PTHR10196: ; G3DSA:3.30.420.40: ; IPR018484: Carbohydrate kinase, FGGY, N-terminal; IPR018485: Carbohydrate kinase, FGGY, C-terminal; SSF53067:	NA	Metabolism	other localisation
Ec-01_002820	AAA+ ATPase domain	GO:0005524	cd00009: AAA; IPR003959: ATPase, AAA-type, core; PTHR23075: ; IPR027417: P-loop containing nucleoside triphosphate hydrolase; mobidb-lite: consensus disorder prediction; G3DSA:3.40.50.300: ; PTHR23075:SF10: ; IPR003593: AAA+ ATPase domain; IPR021911: ATPase family AAA domain-containing protein 3, domain of unknown function DUF3523; Coil:	NA	Membrane function and transporters	other localisation
Ec-01_002830	conserved unknown protein	n/a;n/a;n/a	PTHR33332: ; IPR000477: Reverse transcriptase domain; PTHR33332:SF3:	NA	Unknown	other localisation
Ec-01_002840	Magnesium chelatase subunit H, putative chloroplast precursor	GO:0016851;GO:0015995	IPR003672: CobN/magnesium chelatase; TMhelix: Region of a membrane-bound protein predicted to be embedded in the membrane.; SIGNAL_PEPTIDE: Signal peptide region; IPR011771: Magnesium-chelatase, subunit H; IPR022571: Magnesium chelatase, subunit H, N-terminal; PTHR23304: ; SIGNAL_PEPTIDE_N_REGION: N-terminal region of a signal peptide.; SIGNAL_PEPTIDE_C_REGION: C-terminal region of a signal pepti…	NA	Metabolism	chloroplast
Ec-01_002850	Hypothetical protein	n/a;n/a;n/a	NON_CYTOPLASMIC_DOMAIN: Region of a membrane-bound protein predicted to be outside the membrane, in the extracellular region; SIGNAL_PEPTIDE: Signal peptide region; SignalP-noTM: ; SIGNAL_PEPTIDE_N_REGION: N-terminal region of a signal peptide.; SIGNAL_PEPTIDE_H_REGION: Hydrophobic region of a signal peptide.; SIGNAL_PEPTIDE_C_REGION: C-terminal region of a signal peptide.	NA	Unknown	nd
Ec-01_002870	hypothetical protein	n/a;n/a;n/a	NA	NA	Unknown	nd
Ec-01_002880	conserved unknown protein	GO:0016020;n/a	CYTOPLASMIC_DOMAIN: Region of a membrane-bound protein predicted to be outside the membrane, in the cytoplasm.; NON_CYTOPLASMIC_DOMAIN: Region of a membrane-bound protein predicted to be outside the membrane, in the extracellular region; PTHR13018: ; TMhelix: Region of a membrane-bound protein predicted to be embedded in the membrane.; TRANSMEMBRANE: Region of a membrane-bound protein predicted t…	NA	Unknown	other localisation
Ec-01_002890	conserved unknown protein	n/a;n/a;n/a	NA	NA	Unknown	other localisation
Ec-01_002900	proteasome subunit alpha type 7	GO:0004175;GO:0019773;GO:0006511;GO:0004298	IPR000426: Proteasome alpha-subunit, N-terminal domain; IPR029055: Nucleophile aminohydrolases, N-terminal; Coil: ; IPR001353: Proteasome, subunit alpha/beta; PTHR11599: ; IPR023332: Proteasome A-type subunit	NA	Proteolysis	other localisation
Ec-01_002910	Tetratricopeptide-like helical domain	GO:0005515	G3DSA:3.80.10.10: ; IPR011990: Tetratricopeptide-like helical domain; SSF52047: ; IPR000048: IQ motif, EF-hand binding site; IPR003590: Leucine-rich repeat, ribonuclease inhibitor subtype; CYTOPLASMIC_DOMAIN: Region of a membrane-bound protein predicted to be outside the membrane, in the cytoplasm.; NON_CYTOPLASMIC_DOMAIN: Region of a membrane-bound protein predicted to be outside the membrane, i…	NA	Protein binding or modification	signal peptide
Ec-01_002920	Thioredoxin-like fold	GO:0006457;n/a;GO:0051082;GO:0031072	SIGNAL_PEPTIDE: Signal peptide region; SIGNAL_PEPTIDE_N_REGION: N-terminal region of a signal peptide.; IPR001305: Heat shock protein DnaJ, cysteine-rich domain; SIGNAL_PEPTIDE_C_REGION: C-terminal region of a signal peptide.; NON_CYTOPLASMIC_DOMAIN: Region of a membrane-bound protein predicted to be outside the membrane, in the extracellular region; SignalP-noTM: ; SIGNAL_PEPTIDE_H_REGION: Hydro…	NA	Redox	signal peptide
Ec-01_002930	hypothetical protein	n/a;n/a;n/a	NA	NA	Unknown	other localisation
Ec-01_002940	RGS domain	GO:0038032	IPR000595: Cyclic nucleotide-binding domain; IPR016137: RGS domain; IPR018490: Cyclic nucleotide-binding-like; Coil: ; IPR014710: RmlC-like jelly roll fold	NA	Cellular regulation and signalling	other localisation
Ec-01_002950	YHS domain-containing protein	n/a;n/a;n/a	CYTOPLASMIC_DOMAIN: Region of a membrane-bound protein predicted to be outside the membrane, in the cytoplasm.; NON_CYTOPLASMIC_DOMAIN: Region of a membrane-bound protein predicted to be outside the membrane, in the extracellular region; TMhelix: Region of a membrane-bound protein predicted to be embedded in the membrane.; TRANSMEMBRANE: Region of a membrane-bound protein predicted to be embedded…	NA	Metabolism	signal anchor
Ec-01_002960	conserved unknown protein	n/a;n/a;n/a	NON_CYTOPLASMIC_DOMAIN: Region of a membrane-bound protein predicted to be outside the membrane, in the extracellular region; TMhelix: Region of a membrane-bound protein predicted to be embedded in the membrane.; SIGNAL_PEPTIDE: Signal peptide region; SIGNAL_PEPTIDE_N_REGION: N-terminal region of a signal peptide.; SIGNAL_PEPTIDE_H_REGION: Hydrophobic region of a signal peptide.; SignalP-TM: ; SI…	NA	Unknown	signal peptide
Ec-01_002970	conserved unknown protein	n/a;n/a;n/a	CYTOPLASMIC_DOMAIN: Region of a membrane-bound protein predicted to be outside the membrane, in the cytoplasm.; NON_CYTOPLASMIC_DOMAIN: Region of a membrane-bound protein predicted to be outside the membrane, in the extracellular region; TMhelix: Region of a membrane-bound protein predicted to be embedded in the membrane.; TRANSMEMBRANE: Region of a membrane-bound protein predicted to be embedded…	NA	Unknown	other localisation
Ec-01_002980	Ribokinase-like	GO:0004001;GO:0006166	IPR011611: Carbohydrate kinase PfkB; CYTOPLASMIC_DOMAIN: Region of a membrane-bound protein predicted to be outside the membrane, in the cytoplasm.; G3DSA:3.30.1110.10: ; NON_CYTOPLASMIC_DOMAIN: Region of a membrane-bound protein predicted to be outside the membrane, in the extracellular region; IPR002173: Carbohydrate/puine kinase, PfkB, conserved site; PTHR10584: ; IPR001805: Adenosine kinase; …	KOG2854	Metabolism	other localisation
Ec-01_002990	mitochondrial ADP/ATP translocator	GO:0006810;GO:0055085;GO:0005743;GO:0005215	PTHR24089: ; IPR002067: Mitochondrial carrier protein; IPR023395: Mitochondrial carrier domain; IPR018108: Mitochondrial substrate/solute carrier; IPR002113: Adenine nucleotide translocator 1	KOG0749	Membrane function and transporters	other localisation
Ec-01_003000	Hypothetical protein	n/a;n/a;n/a	NA	NA	Unknown	other localisation
Ec-01_003010	conserved unknown protein	n/a;n/a;n/a	SSF51197: ; G3DSA:2.60.120.620:	NA	Unknown	other localisation
Ec-01_003020	expressed unknown protein	n/a;n/a;n/a	SignalP-TM:	NA	Unknown	other localisation
Ec-01_003040	Glycogen synthase kinase-3 beta (GSK-3 beta)	GO:0004672;GO:0005524;GO:0006468	IPR017441: Protein kinase, ATP binding site; IPR002290: Serine/threonine/dual specificity protein kinase, catalytic domain; G3DSA:3.30.200.20: ; IPR011009: Protein kinase-like domain; IPR008271: Serine/threonine-protein kinase, active site; SignalP-TM: ; PTHR24057: ; IPR000719: Protein kinase domain; G3DSA:1.10.510.10:	KOG0658	Metabolism	other localisation
Ec-01_003050	conserved unknown protein	GO:0003677;n/a	Coil:	NA	Unknown	other localisation
Ec-01_003060	EF-hand domain pair	GO:0005509;n/a	PTHR23063:SF15: ; IPR018247: EF-Hand 1, calcium-binding site; PTHR23063: ; IPR011992: EF-hand domain pair; IPR002048: EF-hand domain	NA	Cellular regulation and signalling	other localisation
Ec-01_003080	Major facilitator superfamily domain	n/a;n/a;n/a	TMhelix: Region of a membrane-bound protein predicted to be embedded in the membrane.; SIGNAL_PEPTIDE: Signal peptide region; SIGNAL_PEPTIDE_N_REGION: N-terminal region of a signal peptide.; SignalP-TM: ; SIGNAL_PEPTIDE_C_REGION: C-terminal region of a signal peptide.; CYTOPLASMIC_DOMAIN: Region of a membrane-bound protein predicted to be outside the membrane, in the cytoplasm.; IPR020846: Major …	NA	Membrane function and transporters	signal peptide
Ec-01_003090	Hypothetical protein	n/a;n/a;n/a	CYTOPLASMIC_DOMAIN: Region of a membrane-bound protein predicted to be outside the membrane, in the cytoplasm.; NON_CYTOPLASMIC_DOMAIN: Region of a membrane-bound protein predicted to be outside the membrane, in the extracellular region; TRANSMEMBRANE: Region of a membrane-bound protein predicted to be embedded in the membrane.	NA	Unknown	nd
Ec-01_003100	Auxin efflux carrier	GO:0055085;GO:0016021	CYTOPLASMIC_DOMAIN: Region of a membrane-bound protein predicted to be outside the membrane, in the cytoplasm.; NON_CYTOPLASMIC_DOMAIN: Region of a membrane-bound protein predicted to be outside the membrane, in the extracellular region; PTHR31651: ; TMhelix: Region of a membrane-bound protein predicted to be embedded in the membrane.; IPR004776: Auxin efflux carrier; TRANSMEMBRANE: Region of a m…	NA	Membrane function and transporters	other localisation
Ec-01_003110	Auxin efflux carrier	GO:0055085;GO:0016021	CYTOPLASMIC_DOMAIN: Region of a membrane-bound protein predicted to be outside the membrane, in the cytoplasm.; NON_CYTOPLASMIC_DOMAIN: Region of a membrane-bound protein predicted to be outside the membrane, in the extracellular region; PTHR31651: ; TMhelix: Region of a membrane-bound protein predicted to be embedded in the membrane.; IPR004776: Auxin efflux carrier; TRANSMEMBRANE: Region of a m…	NA	Membrane function and transporters	signal peptide
Ec-01_003120	Auxin efflux carrier	GO:0055085;GO:0016021	CYTOPLASMIC_DOMAIN: Region of a membrane-bound protein predicted to be outside the membrane, in the cytoplasm.; NON_CYTOPLASMIC_DOMAIN: Region of a membrane-bound protein predicted to be outside the membrane, in the extracellular region; PTHR31651: ; TMhelix: Region of a membrane-bound protein predicted to be embedded in the membrane.; IPR004776: Auxin efflux carrier; TRANSMEMBRANE: Region of a m…	NA	Membrane function and transporters	signal peptide
Ec-01_003130	GDP-4-keto-6-deoxy-D-mannose epimerase-reductase	GO:0003824;GO:0005488;GO:0008152	IPR001509: NAD-dependent epimerase/dehydratase, N-terminal domain; SSF51735: ; IPR028614: GDP-L-fucose synthase; IPR016040: NAD(P)-binding domain; PTHR10366:	NA	Metabolism	other localisation
Ec-01_003140	hypothetical protein	n/a;n/a;n/a	NA	NA	Unknown	nd
Ec-01_003150	Alpha/Beta hydrolase fold	n/a;n/a;n/a	CYTOPLASMIC_DOMAIN: Region of a membrane-bound protein predicted to be outside the membrane, in the cytoplasm.; NON_CYTOPLASMIC_DOMAIN: Region of a membrane-bound protein predicted to be outside the membrane, in the extracellular region; IPR029059: Alpha/beta hydrolase fold-5; IPR029058: Alpha/Beta hydrolase fold; TMhelix: Region of a membrane-bound protein predicted to be embedded in the membran…	NA	Metabolism	other localisation
Ec-01_003160	Rubisco LSMT, substrate-binding domain	n/a;n/a;n/a	G3DSA:3.90.1410.10: ; SIGNAL_PEPTIDE: Signal peptide region; PTHR13271: ; SIGNAL_PEPTIDE_N_REGION: N-terminal region of a signal peptide.; SSF82199: ; SIGNAL_PEPTIDE_C_REGION: C-terminal region of a signal peptide.; NON_CYTOPLASMIC_DOMAIN: Region of a membrane-bound protein predicted to be outside the membrane, in the extracellular region; IPR015353: Rubisco LSMT, substrate-binding domain; SIGNAL…	NA	Photosynthesis	other localisation
Ec-01_003170	Hypothetical leucine rich repeat protein	GO:0005515;GO:0005509	G3DSA:3.80.10.10: ; IPR018247: EF-Hand 1, calcium-binding site; SSF52058: ; IPR001611: Leucine-rich repeat; IPR002048: EF-hand domain; IPR025875: Leucine rich repeat 4; IPR011992: EF-hand domain pair; SSF47473: ; PTHR23155: ; PF13833: EF-hand domain pair; SM00364: Leucine-rich repeats, bacterial type; IPR003591: Leucine-rich repeat, typical subtype; SM00365: Leucine-rich repeat, SDS22-like subfam…	NA	Cellular regulation and signalling	other localisation
Ec-01_003180	Transmembrane protein TauE like	GO:0016021	TMhelix: Region of a membrane-bound protein predicted to be embedded in the membrane.; SIGNAL_PEPTIDE: Signal peptide region; SIGNAL_PEPTIDE_N_REGION: N-terminal region of a signal peptide.; IPR002781: Transmembrane protein TauE-like; SIGNAL_PEPTIDE_C_REGION: C-terminal region of a signal peptide.; CYTOPLASMIC_DOMAIN: Region of a membrane-bound protein predicted to be outside the membrane, in the…	NA	Membrane function and transporters	signal peptide
Ec-01_003190	Cyclophilin-like domain	GO:0006457;GO:0003755	IPR024936: Cyclophilin-type peptidyl-prolyl cis-trans isomerase; IPR002130: Cyclophilin-type peptidyl-prolyl cis-trans isomerase domain; IPR020892: Cyclophilin-type peptidyl-prolyl cis-trans isomerase, conserved site; IPR029000: Cyclophilin-like domain	NA	Protein binding or modification	other localisation
Ec-01_003210	Aldehyde dehydrogenase	GO:0016620;GO:0008152;GO:0055114;GO:0016491	NA	KOG2451	Metabolism	other localisation
Ec-01_003220	expressed unknown protein	n/a;n/a;n/a	NA	NA	Unknown	other localisation
Ec-01_003230	expressed unknown protein	n/a;n/a;n/a	NA	NA	Unknown	other localisation
Ec-01_003240	Amino acid transporter, transmembrane	n/a;n/a;n/a	CYTOPLASMIC_DOMAIN: Region of a membrane-bound protein predicted to be outside the membrane, in the cytoplasm.; NON_CYTOPLASMIC_DOMAIN: Region of a membrane-bound protein predicted to be outside the membrane, in the extracellular region; TMhelix: Region of a membrane-bound protein predicted to be embedded in the membrane.; IPR013057: Amino acid transporter, transmembrane domain; PTHR22950: ; TRAN…	NA	Membrane function and transporters	signal anchor
Ec-01_003250	sec23/sec24 transport protein-related	NA	SSF82754: ; SSF81995: ; IPR006900: Sec23/Sec24, helical domain; IPR012990: Sec23/Sec24 beta-sandwich; PTHR13803: ; G3DSA:2.60.40.1670: ; IPR006896: Sec23/Sec24, trunk domain; IPR029006: ADF-H/Gelsolin-like domain; IPR006895: Zinc finger, Sec23/Sec24-type; IPR002035: von Willebrand factor, type A	NA	Vesicle trafficking and secretion	other localisation
Ec-01_003260	Glucose-methanol-choline oxidoreductase, C-terminal	GO:0016614;GO:0055114	IPR000172: Glucose-methanol-choline oxidoreductase, N-terminal; IPR012132: Glucose-methanol-choline oxidoreductase; SIGNAL_PEPTIDE: Signal peptide region; IPR007867: Glucose-methanol-choline oxidoreductase, C-terminal; SIGNAL_PEPTIDE_N_REGION: N-terminal region of a signal peptide.; PTHR11552: ; SignalP-TM: ; SSF54373: ; SIGNAL_PEPTIDE_C_REGION: C-terminal region of a signal peptide.; NON_CYTOPLA…	NA	Metabolism	chloroplast
Ec-01_003290	Protein of unknown function DUF2009	n/a;n/a;n/a	IPR018553: Protein of unknown function DUF2009; PTHR31560:	NA	Unknown	other localisation
Ec-01_003300	small nuclear ribonucleoprotein D2-like protein	GO:0030529;GO:0016071	IPR027248: Small nuclear ribonucleoprotein Sm D2; IPR001163: LSM domain, eukaryotic/archaea-type; G3DSA:2.30.30.100: ; IPR010920: LSM domain	NA	RNA modification or binding	other localisation
Ec-01_003310	Protein of unknown function DUF543	n/a;n/a;n/a	CYTOPLASMIC_DOMAIN: Region of a membrane-bound protein predicted to be outside the membrane, in the cytoplasm.; NON_CYTOPLASMIC_DOMAIN: Region of a membrane-bound protein predicted to be outside the membrane, in the extracellular region; TMhelix: Region of a membrane-bound protein predicted to be embedded in the membrane.; IPR007512: Protein of unknown function DUF543; TRANSMEMBRANE: Region of a …	NA	Unknown	other localisation
Ec-01_003320	Tryptophan/tyrosine permease	GO:0003333	TMhelix: Region of a membrane-bound protein predicted to be embedded in the membrane.; SIGNAL_PEPTIDE: Signal peptide region; SIGNAL_PEPTIDE_N_REGION: N-terminal region of a signal peptide.; SignalP-TM: ; SIGNAL_PEPTIDE_C_REGION: C-terminal region of a signal peptide.; CYTOPLASMIC_DOMAIN: Region of a membrane-bound protein predicted to be outside the membrane, in the cytoplasm.; NON_CYTOPLASMIC_D…	NA	Membrane function and transporters	signal peptide
Ec-01_003330	expressed unknown protein	n/a;n/a;n/a	NA	NA	Unknown	other localisation
Ec-01_003340	expressed unknown protein	n/a;n/a;n/a	TMhelix: Region of a membrane-bound protein predicted to be embedded in the membrane.; SIGNAL_PEPTIDE: Signal peptide region; SIGNAL_PEPTIDE_N_REGION: N-terminal region of a signal peptide.; SIGNAL_PEPTIDE_C_REGION: C-terminal region of a signal peptide.; SignalP-TM: ; G3DSA:3.40.50.10730: ; NON_CYTOPLASMIC_DOMAIN: Region of a membrane-bound protein predicted to be outside the membrane, in the ex…	NA	Unknown	chloroplast
Ec-01_003350	MutS protein homolog 6	GO:0006298	SSF63748: ; IPR007861: DNA mismatch repair protein MutS, clamp; IPR007860: DNA mismatch repair protein MutS, connector domain; IPR007696: DNA mismatch repair protein MutS, core; PTHR11361: ; IPR027417: P-loop containing nucleoside triphosphate hydrolase; IPR007695: DNA mismatch repair protein MutS-like, N-terminal; PIRSF037677: ; IPR016151: DNA mismatch repair protein MutS, N-terminal; G3DSA:1.10…	KOG0217	DNA or chromatin modification	other localisation
Ec-01_003370	GWT1	GO:0006506;GO:0016746;GO:0016021;GO:0005789	CYTOPLASMIC_DOMAIN: Region of a membrane-bound protein predicted to be outside the membrane, in the cytoplasm.; NON_CYTOPLASMIC_DOMAIN: Region of a membrane-bound protein predicted to be outside the membrane, in the extracellular region; TMhelix: Region of a membrane-bound protein predicted to be embedded in the membrane.; IPR009447: GWT1; TRANSMEMBRANE: Region of a membrane-bound protein predict…	NA	Protein binding or modification	other localisation
Ec-01_003380	RNA recognition motif domain	GO:0000166;GO:0003676	SSF54928: ; PF14259: RNA recognition motif (a.k.a. RRM, RBD, or RNP domain); IPR000504: RNA recognition motif domain; IPR012677: Nucleotide-binding alpha-beta plait domain; PTHR13976:	NA	RNA modification or binding	other localisation
Ec-01_003390	dynein heavy chain	GO:0007018;GO:0003777	PF13964: Kelch motif; IPR004273: Dynein heavy chain domain; PF12774: Hydrolytic ATP binding site of dynein motor region D1; IPR014756: Immunoglobulin E-set; PF12775: P-loop containing dynein motor region D3; PF13418: Galactose oxidase, central domain; IPR002909: IPT domain; IPR024317: Dynein heavy chain, P-loop containing D4 domain; IPR013783: Immunoglobulin-like fold; IPR024743: Dynein heavy cha…	NA	Cytoskeleton and flagella	other localisation
Ec-01_003400	conserved unknown protein	NA	NA	NA	Unknown	other localisation
Ec-01_003410	Nucleolar protein 14	GO:0032040	IPR007276: Nucleolar protein 14; Coil:	NA	DNA or chromatin modification	other localisation
Ec-01_003420	Armadillo-like helical	GO:0005488;GO:0006402;GO:0030014	IPR007216: Rcd1/Caf40; IPR011989: Armadillo-like helical; IPR016024: Armadillo-type fold; PF04078: Cell differentiation family, Rcd1-like	NA	Cellular regulation and signalling	other localisation
Ec-01_003430	Hypothetical protein	n/a;n/a;n/a	NA	NA	Unknown	nd
Ec-01_003440	hypothetical protein	n/a;n/a;n/a	NA	NA	Unknown	other localisation
Ec-01_003460	Hypothetical protein	n/a;n/a;n/a	NA	NA	Unknown	other localisation
Ec-01_003470	Brix domain	n/a;n/a;n/a	IPR007109: Brix domain; IPR004154: Anticodon-binding; PTHR22734:SF2: ; PTHR22734:	NA	Unknown	mitochondrion
Ec-01_003490	Ribosomal protein S6 kinase	GO:0005524;GO:0004674;GO:0004672;GO:0006468	IPR017441: Protein kinase, ATP binding site; IPR002290: Serine/threonine/dual specificity protein kinase, catalytic domain; G3DSA:3.30.200.20: ; IPR008271: Serine/threonine-protein kinase, active site; IPR000961: AGC-kinase, C-terminal; IPR011009: Protein kinase-like domain; IPR000719: Protein kinase domain; G3DSA:1.10.510.10: ; PTHR24351:	KOG0598	Protein synthesis	other localisation
Ec-01_003500	Anthranilate Phosphoribosyltransferase	GO:0000162;GO:0004048;GO:0008152;GO:0016757	NA	KOG1438	Metabolism	signal peptide
Ec-01_003510	flagellar associated protein	GO:0005515	IPR017986: WD40-repeat-containing domain; IPR001680: WD40 repeat; IPR015943: WD40/YVTN repeat-like-containing domain; Coil: ; PTHR32215:	NA	Cytoskeleton and flagella	other localisation
Ec-01_003520	conserved unknown protein	GO:0005509	IPR002048: EF-hand domain; IPR011992: EF-hand domain pair; PTHR31658: ; PF08700: Vps51/Vps67	NA	Unknown	other localisation
Ec-01_003540	elongation factor EF-3	GO:0005524;GO:0016887	IPR011989: Armadillo-like helical; IPR003439: ABC transporter-like; IPR027417: P-loop containing nucleoside triphosphate hydrolase; IPR021133: HEAT, type 2; PTHR19211: ; IPR003593: AAA+ ATPase domain; IPR015688: Elongation Factor 3; IPR016024: Armadillo-type fold; IPR017871: ABC transporter, conserved site	KOG0062	Protein synthesis	other localisation
Ec-01_003550	Diphthamide biosynthesis protein 1, putative	NA	IPR016435: Diphthamide synthesis DPH1/DPH2; PIRSF004967:	NA	Metabolism	other localisation
Ec-01_003560	Domain of unknown function DUF1777	n/a;n/a;n/a	Coil: ; IPR013957: Domain of unknown function DUF1777; PTHR31077:	NA	Unknown	other localisation
Ec-01_003570	Serine/threonine/dual specificity protein kinase, catalytic domain	GO:0004672;GO:0005524;GO:0006468	IPR015661: Mitotic spindle checkpoint protein Bub1/Mad3; IPR017441: Protein kinase, ATP binding site; IPR000719: Protein kinase domain; IPR002290: Serine/threonine/dual specificity protein kinase, catalytic domain; G3DSA:3.30.200.20: ; G3DSA:1.10.510.10: ; IPR013212: Mad3/Bub1 homology region 1; IPR011009: Protein kinase-like domain	KOG1166	Cellular regulation and signalling	other localisation
Ec-01_003590	Peptidyl-prolyl cis-trans isomerase, FKBP-type	GO:0006457	SSF48452: ; SSF54534: ; G3DSA:3.10.50.40: ; IPR011990: Tetratricopeptide-like helical domain; IPR023566: Peptidyl-prolyl cis-trans isomerase, FKBP-type; IPR001179: Peptidyl-prolyl cis-trans isomerase, FKBP-type, domain; CYTOPLASMIC_DOMAIN: Region of a membrane-bound protein predicted to be outside the membrane, in the cytoplasm.; NON_CYTOPLASMIC_DOMAIN: Region of a membrane-bound protein predicte…	KOG0543	Protein binding or modification	other localisation
Ec-01_003600	expressed unknown protein	n/a;n/a;n/a	NON_CYTOPLASMIC_DOMAIN: Region of a membrane-bound protein predicted to be outside the membrane, in the extracellular region; SIGNAL_PEPTIDE: Signal peptide region; SignalP-noTM: ; Coil: ; SIGNAL_PEPTIDE_N_REGION: N-terminal region of a signal peptide.; SIGNAL_PEPTIDE_H_REGION: Hydrophobic region of a signal peptide.; SIGNAL_PEPTIDE_C_REGION: C-terminal region of a signal peptide.	NA	Unknown	signal peptide
Ec-01_003610	expressed unknown protein	n/a;n/a;n/a	NON_CYTOPLASMIC_DOMAIN: Region of a membrane-bound protein predicted to be outside the membrane, in the extracellular region; SIGNAL_PEPTIDE: Signal peptide region; SignalP-noTM: ; SIGNAL_PEPTIDE_N_REGION: N-terminal region of a signal peptide.; SIGNAL_PEPTIDE_H_REGION: Hydrophobic region of a signal peptide.; SIGNAL_PEPTIDE_C_REGION: C-terminal region of a signal peptide.	NA	Unknown	signal peptide
Ec-01_003620	Armadillo-type fold	GO:0005488	CYTOPLASMIC_DOMAIN: Region of a membrane-bound protein predicted to be outside the membrane, in the cytoplasm.; NON_CYTOPLASMIC_DOMAIN: Region of a membrane-bound protein predicted to be outside the membrane, in the extracellular region; TMhelix: Region of a membrane-bound protein predicted to be embedded in the membrane.; SignalP-noTM: ; PTHR19316: ; IPR011989: Armadillo-like helical; IPR016024:…	NA	Cellular regulation and signalling	signal peptide
Ec-01_003630	RNA recognition motif domain	GO:0000166;GO:0003676	SSF54928: ; PTHR24012: ; IPR000504: RNA recognition motif domain; IPR012677: Nucleotide-binding alpha-beta plait domain	NA	RNA modification or binding	other localisation
Ec-01_003640	Arginyl-tRNA Synthetase	GO:0004814;GO:0005524;GO:0006420	IPR001412: Aminoacyl-tRNA synthetase, class I, conserved site; IPR008909: DALR anticodon binding; IPR005148: Arginyl tRNA synthetase N-terminal domain; IPR000738: WHEP-TRS; IPR001278: Arginine-tRNA ligase; IPR009080: Aminoacyl-tRNA synthetase, class 1a, anticodon-binding; IPR014729: Rossmann-like alpha/beta/alpha sandwich fold; SSF52374: ; IPR010987: Glutathione S-transferase, C-terminal-like; IP…	KOG4426	Protein synthesis	other localisation
Ec-01_003650	GRIP	GO:0005515;GO:0000042	IPR000237: GRIP; Coil:	NA	Vesicle trafficking and secretion	other localisation
Ec-01_003660	Peroxiredoxin-like protein	NA	PF13911: AhpC/TSA antioxidant enzyme; IPR012336: Thioredoxin-like fold	NA	Redox	other localisation
Ec-01_003670	Thioredoxin-like fold	n/a;GO:0045454	SIGNAL_PEPTIDE: Signal peptide region; SIGNAL_PEPTIDE_N_REGION: N-terminal region of a signal peptide.; IPR013766: Thioredoxin domain; IPR017937: Thioredoxin, conserved site; SIGNAL_PEPTIDE_C_REGION: C-terminal region of a signal peptide.; IPR005746: Thioredoxin; NON_CYTOPLASMIC_DOMAIN: Region of a membrane-bound protein predicted to be outside the membrane, in the extracellular region; SignalP-n…	NA	Redox	signal peptide
Ec-01_003680	malate dehydrogenase	GO:0004470;GO:0004471;GO:0006108;GO:0055114	IPR001891: Malic oxidoreductase; IPR012302: Malic enzyme, NAD-binding; IPR015884: Malic enzyme, conserved site; SSF51735: ; IPR012301: Malic enzyme, N-terminal domain; PTHR23406: ; SSF53223: ; IPR016040: NAD(P)-binding domain	KOG1257	Metabolism	other localisation
Ec-01_003690	AAA+ ATPase domain	GO:0000166;GO:0005524;GO:0017111	IPR003959: ATPase, AAA-type, core; IPR003593: AAA+ ATPase domain; IPR027417: P-loop containing nucleoside triphosphate hydrolase; PTHR23077:	KOG0740	Membrane function and transporters	other localisation
Ec-01_003700	possible ribosome assembly protein 4	GO:0005509	IPR018247: EF-Hand 1, calcium-binding site; IPR019775: WD40 repeat, conserved site; IPR011992: EF-hand domain pair; IPR002048: EF-hand domain; IPR001680: WD40 repeat; PTHR22847: ; IPR017986: WD40-repeat-containing domain; IPR015943: WD40/YVTN repeat-like-containing domain	NA	Protein synthesis	other localisation
Ec-01_003710	Hypothetical leucine rich repeat protein	NA	NA	NA	Cellular regulation and signalling	other localisation
Ec-01_003730	Type III pantothenate kinase	GO:0004594	G3DSA:3.30.420.40: ; IPR004619: Type III pantothenate kinase; SSF53067:	NA	Metabolism	other localisation
Ec-01_003740	hypothetical protein	GO:0005515;GO:0008270	IPR019786: Zinc finger, PHD-type, conserved site; IPR013083: Zinc finger, RING/FYVE/PHD-type; IPR001965: Zinc finger, PHD-type; IPR011011: Zinc finger, FYVE/PHD-type; Coil: ; IPR019787: Zinc finger, PHD-finger	NA	Unknown	other localisation
Ec-01_003750	BRCT domain	GO:0005622	Coil: ; IPR001357: BRCT domain	NA	Unknown	other localisation
Ec-01_003760	Protein of unknown function DUF3172	n/a;n/a;n/a	NON_CYTOPLASMIC_DOMAIN: Region of a membrane-bound protein predicted to be outside the membrane, in the extracellular region; SIGNAL_PEPTIDE: Signal peptide region; IPR021511: Protein of unknown function DUF3172; SIGNAL_PEPTIDE_N_REGION: N-terminal region of a signal peptide.; SIGNAL_PEPTIDE_H_REGION: Hydrophobic region of a signal peptide.; SIGNAL_PEPTIDE_C_REGION: C-terminal region of a signal …	NA	Unknown	chloroplast
Ec-01_003770	hypothetical protein	n/a;n/a;n/a	SIGNAL_PEPTIDE: Signal peptide region; SIGNAL_PEPTIDE_N_REGION: N-terminal region of a signal peptide.; SignalP-TM: ; SIGNAL_PEPTIDE_C_REGION: C-terminal region of a signal peptide.; CYTOPLASMIC_DOMAIN: Region of a membrane-bound protein predicted to be outside the membrane, in the cytoplasm.; NON_CYTOPLASMIC_DOMAIN: Region of a membrane-bound protein predicted to be outside the membrane, in the …	NA	Unknown	signal peptide
Ec-01_003780	Sterol C-5 desaturase	GO:0005506;GO:0006633;GO:0016491;GO:0055114	PTHR11863:SF33: ; TMhelix: Region of a membrane-bound protein predicted to be embedded in the membrane.; SIGNAL_PEPTIDE: Signal peptide region; SIGNAL_PEPTIDE_N_REGION: N-terminal region of a signal peptide.; SignalP-TM: ; SIGNAL_PEPTIDE_C_REGION: C-terminal region of a signal peptide.; CYTOPLASMIC_DOMAIN: Region of a membrane-bound protein predicted to be outside the membrane, in the cytoplasm.;…	NA	Metabolism	signal peptide
Ec-01_003790	flagellar associated protein	GO:0008152;GO:0016740;n/a	PTHR18962:SF0: ; PTHR18962: ; Coil:	NA	Cytoskeleton and flagella	other localisation
Ec-01_003800	Ribosomal protein S21e	GO:0005840;GO:0006412;GO:0005622;GO:0003735	IPR001931: Ribosomal protein S21e	NA	Protein synthesis	other localisation
Ec-01_003810	hypothetical protein	n/a;n/a;n/a	NA	NA	Unknown	other localisation
Ec-01_003820	Glycoside hydrolase superfamily	n/a;n/a;n/a	SIGNAL_PEPTIDE: Signal peptide region; SIGNAL_PEPTIDE_N_REGION: N-terminal region of a signal peptide.; IPR017853: Glycoside hydrolase superfamily; SignalP-TM: ; SIGNAL_PEPTIDE_C_REGION: C-terminal region of a signal peptide.; NON_CYTOPLASMIC_DOMAIN: Region of a membrane-bound protein predicted to be outside the membrane, in the extracellular region; SignalP-noTM: ; SIGNAL_PEPTIDE_H_REGION: Hydro…	NA	Metabolism	signal peptide
Ec-01_003830	hypothetical protein	n/a;n/a;n/a	NA	NA	Unknown	other localisation
Ec-01_003840	plastid division protein FtsZ	GO:0051258;GO:0006184;GO:0043234;GO:0005525;GO:0003924	IPR000158: Cell division protein FtsZ; SIGNAL_PEPTIDE: Signal peptide region; IPR003008: Tubulin/FtsZ, GTPase domain; SIGNAL_PEPTIDE_N_REGION: N-terminal region of a signal peptide.; PTHR30314: ; IPR008280: Tubulin/FtsZ, C-terminal; SignalP-TM: ; SIGNAL_PEPTIDE_C_REGION: C-terminal region of a signal peptide.; IPR024757: Cell division protein FtsZ, C-terminal; NON_CYTOPLASMIC_DOMAIN: Region of a …	NA	Cytoskeleton and flagella	chloroplast
Ec-01_003850	disproportionate superoxide radical into hydrogen peroxide	GO:0006801;GO:0046872;GO:0055114	PTHR10003: ; IPR001424: Superoxide dismutase, copper/zinc binding domain	NA	Redox	other localisation
Ec-01_003860	Ankyrin, TRAF-type zinc finger protein	GO:0005515	IPR008974: TRAF-like; PTHR24188: ; IPR001293: Zinc finger, TRAF-type; IPR020683: Ankyrin repeat-containing domain; PF02176: TRAF-type zinc finger; IPR013323: SIAH-type domain; Coil: ; IPR002110: Ankyrin repeat	NA	Membrane function and transporters	other localisation
Ec-01_003870	Anoctamin	n/a;n/a;n/a	CYTOPLASMIC_DOMAIN: Region of a membrane-bound protein predicted to be outside the membrane, in the cytoplasm.; NON_CYTOPLASMIC_DOMAIN: Region of a membrane-bound protein predicted to be outside the membrane, in the extracellular region; IPR007632: Anoctamin; TMhelix: Region of a membrane-bound protein predicted to be embedded in the membrane.; TRANSMEMBRANE: Region of a membrane-bound protein pr…	NA	Membrane function and transporters	other localisation
Ec-01_003880	conserved unknown protein	n/a;n/a;n/a	PTHR33403:SF5: ; PTHR33403:	NA	Unknown	other localisation
Ec-01_003890	PObg1, plastid Obg/CgtA-like GTPase 1	GO:0000287;GO:0005525;GO:0003924	IPR006169: GTP1/OBG domain; SIGNAL_PEPTIDE: Signal peptide region; IPR031167: OBG-type guanine nucleotide-binding (G) domain; IPR027417: P-loop containing nucleoside triphosphate hydrolase; PTHR11702: ; SIGNAL_PEPTIDE_N_REGION: N-terminal region of a signal peptide.; IPR014100: GTP-binding protein Obg/CgtA; SignalP-TM: ; SIGNAL_PEPTIDE_C_REGION: C-terminal region of a signal peptide.; NON_CYTOPLA…	NA	Cellular regulation and signalling	signal peptide
Ec-01_003900	expressed unknown protein	n/a;n/a;n/a	NON_CYTOPLASMIC_DOMAIN: Region of a membrane-bound protein predicted to be outside the membrane, in the extracellular region; SIGNAL_PEPTIDE: Signal peptide region; SIGNAL_PEPTIDE_N_REGION: N-terminal region of a signal peptide.; SIGNAL_PEPTIDE_H_REGION: Hydrophobic region of a signal peptide.	NA	Unknown	signal peptide
Ec-01_003910	Cyclophilin-like domain	GO:0006457;GO:0003755	IPR024936: Cyclophilin-type peptidyl-prolyl cis-trans isomerase; IPR002130: Cyclophilin-type peptidyl-prolyl cis-trans isomerase domain; IPR020892: Cyclophilin-type peptidyl-prolyl cis-trans isomerase, conserved site; IPR029000: Cyclophilin-like domain; Coil:	NA	Protein binding or modification	other localisation
Ec-01_003920	Uncharacterised domain SAYSvFN	n/a;n/a;n/a	CYTOPLASMIC_DOMAIN: Region of a membrane-bound protein predicted to be outside the membrane, in the cytoplasm.; NON_CYTOPLASMIC_DOMAIN: Region of a membrane-bound protein predicted to be outside the membrane, in the extracellular region; TMhelix: Region of a membrane-bound protein predicted to be embedded in the membrane.; PTHR13527: ; IPR019387: Uncharacterised domain SAYSvFN; TRANSMEMBRANE: Reg…	NA	Unknown	other localisation
Ec-01_003930	hypothetical protein	n/a;n/a;n/a	NON_CYTOPLASMIC_DOMAIN: Region of a membrane-bound protein predicted to be outside the membrane, in the extracellular region; SIGNAL_PEPTIDE: Signal peptide region; SIGNAL_PEPTIDE_N_REGION: N-terminal region of a signal peptide.; Coil: ; SIGNAL_PEPTIDE_H_REGION: Hydrophobic region of a signal peptide.; SignalP-TM: ; SIGNAL_PEPTIDE_C_REGION: C-terminal region of a signal peptide.	NA	Unknown	other localisation
Ec-01_003940	Serine/threonine-protein kinase CTR1	GO:0004672;GO:0005524;GO:0006468	PTHR23257: ; IPR000719: Protein kinase domain; IPR002290: Serine/threonine/dual specificity protein kinase, catalytic domain; G3DSA:3.30.200.20: ; G3DSA:1.10.510.10: ; PIRSF000654: ; IPR011009: Protein kinase-like domain	NA	Cellular regulation and signalling	other localisation
Ec-01_003950	Hypothetical protein	n/a;n/a;n/a	NA	NA	Unknown	nd
Ec-01_003960	Glycerol-3-phosphate O-acyltransferase	GO:0008152;GO:0016746	NA	NA	Metabolism	other localisation
Ec-01_003970	hypothetical protein	n/a;GO:0005515	CYTOPLASMIC_DOMAIN: Region of a membrane-bound protein predicted to be outside the membrane, in the cytoplasm.; NON_CYTOPLASMIC_DOMAIN: Region of a membrane-bound protein predicted to be outside the membrane, in the extracellular region; TMhelix: Region of a membrane-bound protein predicted to be embedded in the membrane.; Coil: ; IPR000048: IQ motif, EF-hand binding site; TRANSMEMBRANE: Region o…	NA	Unknown	other localisation
Ec-01_003980	expressed unknown protein	n/a;n/a;n/a	NA	NA	Unknown	mitochondrion
Ec-01_003990	putative respiratory burst oxidase homolog protein	GO:0055114;GO:0016491	TMhelix: Region of a membrane-bound protein predicted to be embedded in the membrane.; G3DSA:2.40.30.10: ; SSF52343: ; CYTOPLASMIC_DOMAIN: Region of a membrane-bound protein predicted to be outside the membrane, in the cytoplasm.; PTHR11972: ; NON_CYTOPLASMIC_DOMAIN: Region of a membrane-bound protein predicted to be outside the membrane, in the extracellular region; IPR013121: Ferric reductase, …	KOG0039	Metabolism	other localisation
Ec-01_004000	Basic-leucine zipper domain	GO:0006355;GO:0043565;GO:0003700	IPR004827: Basic-leucine zipper domain; SSF57959: ; G3DSA:1.20.5.170: ; Coil:	NA	Transcription	other localisation
Ec-01_004010	hypothetical protein	n/a;n/a;n/a	NA	NA	Unknown	other localisation
Ec-01_004020	Protein kinase-like domain	GO:0004672;GO:0006468;GO:0016772	PTHR24349: ; IPR017441: Protein kinase, ATP binding site; IPR002290: Serine/threonine/dual specificity protein kinase, catalytic domain; G3DSA:3.30.200.20: ; IPR008271: Serine/threonine-protein kinase, active site; IPR011009: Protein kinase-like domain; CYTOPLASMIC_DOMAIN: Region of a membrane-bound protein predicted to be outside the membrane, in the cytoplasm.; NON_CYTOPLASMIC_DOMAIN: Region of…	NA	Cellular regulation and signalling	signal anchor
Ec-01_004030	C2 domain	GO:0005515	CYTOPLASMIC_DOMAIN: Region of a membrane-bound protein predicted to be outside the membrane, in the cytoplasm.; NON_CYTOPLASMIC_DOMAIN: Region of a membrane-bound protein predicted to be outside the membrane, in the extracellular region; PTHR12546: ; TMhelix: Region of a membrane-bound protein predicted to be embedded in the membrane.; IPR000008: C2 domain; TRANSMEMBRANE: Region of a membrane-bou…	NA	Cellular regulation and signalling	other localisation
Ec-01_004040	WD repeat-containing protein	n/a;n/a;n/a	NA	NA	Protein binding or modification	other localisation
Ec-01_004050	WD40/YVTN repeat-like-containing domain	GO:0005515	CYTOPLASMIC_DOMAIN: Region of a membrane-bound protein predicted to be outside the membrane, in the cytoplasm.; NON_CYTOPLASMIC_DOMAIN: Region of a membrane-bound protein predicted to be outside the membrane, in the extracellular region; IPR017986: WD40-repeat-containing domain; IPR001680: WD40 repeat; IPR015943: WD40/YVTN repeat-like-containing domain; TRANSMEMBRANE: Region of a membrane-bound p…	NA	Protein binding or modification	other localisation
Ec-01_004060	expressed unknown protein	n/a;n/a;n/a	NA	NA	Unknown	other localisation
Ec-01_004070	Hypothetical protein	n/a;n/a;n/a	NA	NA	Unknown	other localisation
Ec-01_004080	FerIin domain	n/a;GO:0005515	CYTOPLASMIC_DOMAIN: Region of a membrane-bound protein predicted to be outside the membrane, in the cytoplasm.; NON_CYTOPLASMIC_DOMAIN: Region of a membrane-bound protein predicted to be outside the membrane, in the extracellular region; PTHR12546: ; TMhelix: Region of a membrane-bound protein predicted to be embedded in the membrane.; IPR012968: FerIin domain; Coil: ; IPR000008: C2 domain; TRANS…	NA	Metabolism	other localisation
Ec-01_004090	hypothetical protein	n/a;n/a;n/a	CYTOPLASMIC_DOMAIN: Region of a membrane-bound protein predicted to be outside the membrane, in the cytoplasm.; NON_CYTOPLASMIC_DOMAIN: Region of a membrane-bound protein predicted to be outside the membrane, in the extracellular region; TMhelix: Region of a membrane-bound protein predicted to be embedded in the membrane.; Coil: ; TRANSMEMBRANE: Region of a membrane-bound protein predicted to be …	NA	Unknown	other localisation
Ec-01_004100	Armadillo-like helical	GO:0005634;GO:0005488	PTHR16199: ; IPR011989: Armadillo-like helical; IPR016024: Armadillo-type fold; IPR024741: Condensin-2 complex subunit G2	NA	Cellular regulation and signalling	other localisation
Ec-01_004110	Tetratricopeptide-like helical domain	GO:0005515	SSF48452: ; CYTOPLASMIC_DOMAIN: Region of a membrane-bound protein predicted to be outside the membrane, in the cytoplasm.; NON_CYTOPLASMIC_DOMAIN: Region of a membrane-bound protein predicted to be outside the membrane, in the extracellular region; IPR011990: Tetratricopeptide-like helical domain; TRANSMEMBRANE: Region of a membrane-bound protein predicted to be embedded in the membrane.	NA	Protein binding or modification	other localisation
Ec-01_004120	inorganic pyrophosphatase	GO:0016020;GO:0004427;GO:0015992;GO:0009678	CYTOPLASMIC_DOMAIN: Region of a membrane-bound protein predicted to be outside the membrane, in the cytoplasm.; NON_CYTOPLASMIC_DOMAIN: Region of a membrane-bound protein predicted to be outside the membrane, in the extracellular region; IPR004131: Pyrophosphate-energised proton pump; TMhelix: Region of a membrane-bound protein predicted to be embedded in the membrane.; TRANSMEMBRANE: Region of a…	NA	Metabolism	other localisation
Ec-01_004130	hypothetical protein	n/a;n/a;n/a	NA	NA	Unknown	other localisation
Ec-01_004140	hypothetical protein	n/a;n/a;n/a	NA	NA	Unknown	other localisation
Ec-01_004150	SH3 domain	GO:0005515;GO:0005737	IPR027267: Arfaptin homology (AH) domain/BAR domain; G3DSA:2.30.30.40: ; IPR001452: SH3 domain; SSF103657: ; PR00499: Neutrophil cytosol factor 2 signature; IPR004148: BAR domain; Coil: ; PTHR10661:	NA	Cellular regulation and signalling	other localisation
Ec-01_004160	Protein for assembly of pre-ribosomal particles containing 18S rRNA	GO:0000166	PTHR24012: ; SIGNAL_PEPTIDE: Signal peptide region; SIGNAL_PEPTIDE_N_REGION: N-terminal region of a signal peptide.; SIGNAL_PEPTIDE_C_REGION: C-terminal region of a signal peptide.; SignalP-TM: ; SSF54928: ; NON_CYTOPLASMIC_DOMAIN: Region of a membrane-bound protein predicted to be outside the membrane, in the extracellular region; IPR000504: RNA recognition motif domain; PF14259: RNA recognition…	NA	Protein synthesis	other localisation
Ec-01_004170	RGS domain	GO:0038032	TMhelix: Region of a membrane-bound protein predicted to be embedded in the membrane.; PTHR10845:SF168: ; CYTOPLASMIC_DOMAIN: Region of a membrane-bound protein predicted to be outside the membrane, in the cytoplasm.; NON_CYTOPLASMIC_DOMAIN: Region of a membrane-bound protein predicted to be outside the membrane, in the extracellular region; G3DSA:1.10.167.10: ; IPR016137: RGS domain; PTHR10845: …	NA	Cellular regulation and signalling	signal peptide
Ec-01_004180	RGS domain	GO:0038032	IPR016137: RGS domain; G3DSA:1.10.167.10:	NA	Cellular regulation and signalling	other localisation
Ec-01_004190	Hypothetical protein	n/a;n/a;n/a	NA	NA	Unknown	other localisation
Ec-01_004200	BIG2, ArfGEF protein of the BIG/GBF family	NA	IPR000904: Sec7 domain; IPR011989: Armadillo-like helical; G3DSA:1.10.220.20: ; PTHR10663: ; IPR023394: Sec7 domain, alpha orthogonal bundle; PF12783: Guanine nucleotide exchange factor in Golgi transport N-terminal; IPR016024: Armadillo-type fold; IPR015403: Domain of unknown function DUF1981, Sec7 associated	NA	Cellular regulation and signalling	other localisation
Ec-01_004220	Hypothetical leucine rich repeat protein	NA	SSF52047: ; IPR032675: Leucine-rich repeat domain, L domain-like; Coil: ; IPR003590: Leucine-rich repeat, ribonuclease inhibitor subtype	NA	Cellular regulation and signalling	other localisation
Ec-01_004230	Jumonji and C5HC2 zinc finger domain protein	n/a;n/a;n/a	NA	NA	DNA or chromatin modification	other localisation
Ec-01_004240	Phox homologous domain	GO:0035091	IPR001683: Phox homologous domain	NA	Membrane function and transporters	other localisation
Ec-01_004250	3-deoxy-7-phosphoheptulonate synthase	GO:0003849;GO:0009073	IPR002480: DAHP synthetase, class II; NON_CYTOPLASMIC_DOMAIN: Region of a membrane-bound protein predicted to be outside the membrane, in the extracellular region; SIGNAL_PEPTIDE: Signal peptide region; SignalP-noTM: ; SSF51569: ; SIGNAL_PEPTIDE_N_REGION: N-terminal region of a signal peptide.; SIGNAL_PEPTIDE_H_REGION: Hydrophobic region of a signal peptide.; SIGNAL_PEPTIDE_C_REGION: C-terminal r…	NA	Metabolism	signal peptide
Ec-01_004260	hypothetical protein	n/a;n/a;n/a	Coil:	NA	Unknown	other localisation
Ec-01_004270	MtN3-like protein	GO:0016021	TMhelix: Region of a membrane-bound protein predicted to be embedded in the membrane.; SIGNAL_PEPTIDE: Signal peptide region; SIGNAL_PEPTIDE_N_REGION: N-terminal region of a signal peptide.; SIGNAL_PEPTIDE_C_REGION: C-terminal region of a signal peptide.; CYTOPLASMIC_DOMAIN: Region of a membrane-bound protein predicted to be outside the membrane, in the cytoplasm.; NON_CYTOPLASMIC_DOMAIN: Region …	NA	Vesicle trafficking and secretion	signal anchor
Ec-01_004280	similar to metallopeptidase family M24 containing protein, expressed	NA	NA	NA	Proteolysis	other localisation
Ec-01_004290	hypothetical protein	GO:0016787	IPR029149: Creatinase/Aminopeptidase P/Spt16, N-terminal; PF16189: Creatinase/Prolidase N-terminal domain; PTHR10804: ; IPR028980: Creatinase/Aminopeptidase P, N-terminal; PTHR10804:SF87: ; IPR000587: Creatinase, N-terminal	NA	Unknown	other localisation
Ec-01_004300	conserved unknown protein	n/a;n/a;n/a	Coil:	NA	Unknown	other localisation
Ec-01_004310	mannuronan C-5 epimerase N-terminal fragment	NA	NA	NA	Cell wall and extracellular	signal peptide
Ec-01_004320	Ca2+-ATPase	GO:0005524;GO:0006754;GO:0006812;GO:0015662;GO:0016020	IPR023298: P-type ATPase, transmembrane domain; TMhelix: Region of a membrane-bound protein predicted to be embedded in the membrane.; IPR008250: P-type ATPase, A domain; SSF81653: ; IPR006408: P-type ATPase, subfamily IIB; IPR023214: HAD-like domain; IPR004014: Cation-transporting P-type ATPase, N-terminal; NON_CYTOPLASMIC_DOMAIN: Region of a membrane-bound protein predicted to be outside the me…	NA	Membrane function and transporters	mitochondrion
Ec-01_004330	2,3-dihydro-2,3-dihydroxybenzoate dehydrogenase	GO:0008152;GO:0016491	PTHR24322: ; SSF51735: ; IPR020904: Short-chain dehydrogenase/reductase, conserved site; SIGNAL_PEPTIDE: Signal peptide region; SIGNAL_PEPTIDE_N_REGION: N-terminal region of a signal peptide.; IPR002347: Glucose/ribitol dehydrogenase; IPR002198: Short-chain dehydrogenase/reductase SDR; SIGNAL_PEPTIDE_C_REGION: C-terminal region of a signal peptide.; NON_CYTOPLASMIC_DOMAIN: Region of a membrane-bo…	NA	Metabolism	signal peptide
Ec-01_004340	S-adenosyl-L-methionine-dependent methyltransferase	n/a;n/a;n/a	IPR029063: S-adenosyl-L-methionine-dependent methyltransferase; IPR019410: Nicotinamide N-methyltransferase-like; PTHR14614:	NA	Metabolism	other localisation
Ec-01_004350	Uncharacterised domain NUC130/133, N-terminal	n/a;n/a;n/a	IPR007949: SDA1 domain; CYTOPLASMIC_DOMAIN: Region of a membrane-bound protein predicted to be outside the membrane, in the cytoplasm.; NON_CYTOPLASMIC_DOMAIN: Region of a membrane-bound protein predicted to be outside the membrane, in the extracellular region; IPR012977: Uncharacterised domain NUC130/133, N-terminal; Coil: ; IPR016024: Armadillo-type fold; IPR027312: Sda1; TRANSMEMBRANE: Region …	NA	Unknown	other localisation
Ec-01_004370	Hypothetical protein	n/a;n/a;n/a	SIGNAL_PEPTIDE: Signal peptide region; SIGNAL_PEPTIDE_N_REGION: N-terminal region of a signal peptide.; IPR001471: AP2/ERF domain; SIGNAL_PEPTIDE_C_REGION: C-terminal region of a signal peptide.; NON_CYTOPLASMIC_DOMAIN: Region of a membrane-bound protein predicted to be outside the membrane, in the extracellular region; SignalP-noTM: ; IPR016177: DNA-binding domain; Coil: ; SIGNAL_PEPTIDE_H_REGIO…	NA	Unknown	chloroplast
Ec-01_004380	ABC membrane transporter	GO:0005524;GO:0016887	IPR003439: ABC transporter-like; TMhelix: Region of a membrane-bound protein predicted to be embedded in the membrane.; IPR027417: P-loop containing nucleoside triphosphate hydrolase; CYTOPLASMIC_DOMAIN: Region of a membrane-bound protein predicted to be outside the membrane, in the cytoplasm.; IPR003593: AAA+ ATPase domain; NON_CYTOPLASMIC_DOMAIN: Region of a membrane-bound protein predicted to …	NA	Membrane function and transporters	other localisation
Ec-01_004390	Sugar/inositol transporter	GO:0016020;GO:0055085;GO:0016021;GO:0022891;GO:0022857	IPR005829: Sugar transporter, conserved site; IPR005828: General substrate transporter; IPR003663: Sugar/inositol transporter; TMhelix: Region of a membrane-bound protein predicted to be embedded in the membrane.; SIGNAL_PEPTIDE: Signal peptide region; SIGNAL_PEPTIDE_N_REGION: N-terminal region of a signal peptide.; SIGNAL_PEPTIDE_C_REGION: C-terminal region of a signal peptide.; CYTOPLASMIC_DOMA…	NA	Membrane function and transporters	signal peptide
Ec-01_004400	protein N-methyltransferase	n/a;n/a;n/a	G3DSA:3.90.1410.10: ; Coil: ; SSF82199:	NA	Protein binding or modification	other localisation
Ec-01_004410	MutS protein homolog 1A	GO:0005524;GO:0006298;GO:0030983	IPR000432: DNA mismatch repair protein MutS, C-terminal; IPR027417: P-loop containing nucleoside triphosphate hydrolase; PTHR11361:	NA	DNA or chromatin modification	other localisation
Ec-01_004420	AT hook-like	GO:0006355	SSF63748: ; IPR020478: AT hook-like; IPR017956: AT hook, DNA-binding motif; IPR003618: Transcription elongation factor S-II, central domain; IPR000637: HMG-I/HMG-Y, DNA-binding, conserved site; IPR017923: Transcription factor IIS, N-terminal; G3DSA:2.30.30.160: ; Coil: ; IPR000313: PWWP domain	NA	DNA or chromatin modification	other localisation
Ec-01_004430	Cytochrome b5-like heme/steroid binding domain	GO:0020037	CYTOPLASMIC_DOMAIN: Region of a membrane-bound protein predicted to be outside the membrane, in the cytoplasm.; IPR018506: Cytochrome b5, heme-binding site; NON_CYTOPLASMIC_DOMAIN: Region of a membrane-bound protein predicted to be outside the membrane, in the extracellular region; TMhelix: Region of a membrane-bound protein predicted to be embedded in the membrane.; IPR001199: Cytochrome b5-like…	NA	Respiration	other localisation
Ec-01_004440	Homeodomain-like	GO:0003677	IPR017884: SANT domain; SignalP-TM: ; IPR017877: Myb-like domain; IPR001005: SANT/Myb domain; IPR009057: Homeodomain-like; IPR013083: Zinc finger, RING/FYVE/PHD-type; Coil: ; IPR011011: Zinc finger, FYVE/PHD-type; IPR017930: Myb domain	NA	Transcription	other localisation
Ec-01_004460	Alpha/Beta hydrolase fold	n/a;n/a;n/a	IPR029058: Alpha/Beta hydrolase fold; TMhelix: Region of a membrane-bound protein predicted to be embedded in the membrane.; SIGNAL_PEPTIDE: Signal peptide region; IPR000073: Alpha/beta hydrolase fold-1; SIGNAL_PEPTIDE_N_REGION: N-terminal region of a signal peptide.; SIGNAL_PEPTIDE_C_REGION: C-terminal region of a signal peptide.; PTHR10992: ; NON_CYTOPLASMIC_DOMAIN: Region of a membrane-bound p…	NA	Metabolism	signal peptide
Ec-01_004470	Hypothetical protein	n/a;n/a;n/a	NA	NA	Unknown	other localisation
Ec-01_004480	FAD dependent oxidoreductase	GO:0055114;GO:0016491	IPR006076: FAD dependent oxidoreductase; G3DSA:3.50.50.60: ; SSF51905:	NA	Metabolism	other localisation
Ec-01_004490	expressed unknown protein	n/a;GO:0005515	CYTOPLASMIC_DOMAIN: Region of a membrane-bound protein predicted to be outside the membrane, in the cytoplasm.; NON_CYTOPLASMIC_DOMAIN: Region of a membrane-bound protein predicted to be outside the membrane, in the extracellular region; IPR015943: WD40/YVTN repeat-like-containing domain; TRANSMEMBRANE: Region of a membrane-bound protein predicted to be embedded in the membrane.	NA	Unknown	other localisation
Ec-01_004500	lactoylglutathione lyase family protein / glyoxalase I family protein	n/a;n/a;n/a	IPR025870: Glyoxalase-like domain; PTHR21366: ; IPR029068: Glyoxalase/Bleomycin resistance protein/Dihydroxybiphenyl dioxygenase	NA	Metabolism	other localisation
Ec-01_004510	expressed unknown protein	n/a;n/a;n/a	NA	NA	Unknown	other localisation
Ec-01_004520	Tubulin-tyrosine ligase/Tubulin polyglutamylase	GO:0006464	SSF56059: ; IPR027751: Probable tubulin polyglutamylase TTLL9; IPR004344: Tubulin-tyrosine ligase/Tubulin polyglutamylase; Coil: ; PTHR12241:	KOG2157	Cytoskeleton and flagella	other localisation
Ec-01_004530	Metallo-dependent phosphatase-like	GO:0016787	IPR029052: Metallo-dependent phosphatase-like; IPR004843: Calcineurin-like phosphoesterase domain, apaH type; IPR006186: Serine/threonine-specific protein phosphatase/bis(5-nucleosyl)-tetraphosphatase; PTHR11668:	NA	Cellular regulation and signalling	other localisation
Ec-01_004540	Uncharacterised domain, di-copper centre	n/a;n/a;n/a	CYTOPLASMIC_DOMAIN: Region of a membrane-bound protein predicted to be outside the membrane, in the cytoplasm.; NON_CYTOPLASMIC_DOMAIN: Region of a membrane-bound protein predicted to be outside the membrane, in the extracellular region; IPR008922: Uncharacterised domain, di-copper centre; IPR002227: Tyrosinase copper-binding domain; PTHR11474: ; TMhelix: Region of a membrane-bound protein predic…	NA	Unknown	signal anchor
Ec-01_004550	FAD-linked oxidoreductase-like	NA	SIGNAL_PEPTIDE: Signal peptide region; SIGNAL_PEPTIDE_N_REGION: N-terminal region of a signal peptide.; SignalP-TM: ; SIGNAL_PEPTIDE_C_REGION: C-terminal region of a signal peptide.; NON_CYTOPLASMIC_DOMAIN: Region of a membrane-bound protein predicted to be outside the membrane, in the extracellular region; SignalP-noTM: ; SIGNAL_PEPTIDE_H_REGION: Hydrophobic region of a signal peptide.; IPR02904…	NA	Metabolism	signal peptide
Ec-01_004560	expressed unknown protein	n/a;n/a;n/a	NON_CYTOPLASMIC_DOMAIN: Region of a membrane-bound protein predicted to be outside the membrane, in the extracellular region; SignalP-noTM: ; SIGNAL_PEPTIDE: Signal peptide region; SIGNAL_PEPTIDE_N_REGION: N-terminal region of a signal peptide.; SIGNAL_PEPTIDE_H_REGION: Hydrophobic region of a signal peptide.; SIGNAL_PEPTIDE_C_REGION: C-terminal region of a signal peptide.	NA	Unknown	signal peptide
Ec-01_004570	expressed unknown protein	n/a;n/a;n/a	NA	NA	Unknown	other localisation
Ec-01_004580	conserved unknown protein	n/a;n/a;n/a	NA	NA	Unknown	other localisation
Ec-01_004600	transcription factor C-MYB	NA	PTHR10641: ; IPR001005: SANT/Myb domain; IPR009057: Homeodomain-like; PTHR10641:SF221: ; Coil: ; IPR017930: Myb domain; IPR017877: Myb-like domain	NA	Transcription	other localisation
Ec-01_004610	hypothetical protein	n/a;n/a;n/a	CYTOPLASMIC_DOMAIN: Region of a membrane-bound protein predicted to be outside the membrane, in the cytoplasm.; NON_CYTOPLASMIC_DOMAIN: Region of a membrane-bound protein predicted to be outside the membrane, in the extracellular region; TMhelix: Region of a membrane-bound protein predicted to be embedded in the membrane.; TRANSMEMBRANE: Region of a membrane-bound protein predicted to be embedded…	NA	Unknown	signal peptide
Ec-01_004620	hypothetical protein	n/a;n/a;n/a	NA	NA	Unknown	other localisation
Ec-01_004630	Alpha/Beta hydrolase fold	n/a;n/a;n/a	IPR029058: Alpha/Beta hydrolase fold; SIGNAL_PEPTIDE: Signal peptide region; IPR000073: Alpha/beta hydrolase fold-1; SIGNAL_PEPTIDE_N_REGION: N-terminal region of a signal peptide.; SIGNAL_PEPTIDE_C_REGION: C-terminal region of a signal peptide.; PTHR10992: ; SignalP-TM: ; NON_CYTOPLASMIC_DOMAIN: Region of a membrane-bound protein predicted to be outside the membrane, in the extracellular region;…	NA	Metabolism	chloroplast
Ec-01_004640	ATP-dependent Clp protease, proteolytic subunit ClpP	GO:0004252;GO:0006508;GO:0008462	IPR029045: ClpP/crotonase-like domain; SIGNAL_PEPTIDE: Signal peptide region; IPR018215: ClpP, active site; IPR001907: ATP-dependent Clp protease proteolytic subunit; SIGNAL_PEPTIDE_N_REGION: N-terminal region of a signal peptide.; SignalP-TM: ; SIGNAL_PEPTIDE_C_REGION: C-terminal region of a signal peptide.; NON_CYTOPLASMIC_DOMAIN: Region of a membrane-bound protein predicted to be outside the m…	NA	Proteolysis	signal peptide
Ec-01_004650	beta tubulin	GO:0003924;GO:0005525;GO:0043234;GO:0051258	PTHR11588:SF72: ; IPR002453: Beta tubulin; IPR017975: Tubulin, conserved site; IPR000217: Tubulin; IPR003008: Tubulin/FtsZ, GTPase domain; Coil: ; IPR023123: Tubulin, C-terminal; IPR018316: Tubulin/FtsZ, 2-layer sandwich domain; IPR008280: Tubulin/FtsZ, C-terminal	KOG1375	Cytoskeleton and flagella	other localisation
Ec-01_004660	beta tubulin	GO:0005874;GO:0007017	IPR002453: Beta tubulin; IPR000217: Tubulin; IPR003008: Tubulin/FtsZ, GTPase domain; IPR023123: Tubulin, C-terminal; IPR008280: Tubulin/FtsZ, C-terminal; IPR013838: Beta tubulin, autoregulation binding site; PTHR11588:SF72: ; IPR017975: Tubulin, conserved site; Coil: ; IPR018316: Tubulin/FtsZ, 2-layer sandwich domain	KOG1375	Cytoskeleton and flagella	other localisation
Ec-01_004670	Guanylate-binding protein, N-terminal	GO:0003924;GO:0005525	SIGNAL_PEPTIDE: Signal peptide region; IPR027417: P-loop containing nucleoside triphosphate hydrolase; SIGNAL_PEPTIDE_N_REGION: N-terminal region of a signal peptide.; SIGNAL_PEPTIDE_C_REGION: C-terminal region of a signal peptide.; SignalP-TM: ; IPR015894: Guanylate-binding protein, N-terminal; PTHR10751: ; NON_CYTOPLASMIC_DOMAIN: Region of a membrane-bound protein predicted to be outside the me…	NA	Cellular regulation and signalling	signal peptide
Ec-01_004680	Ankyrin repeat-containing domain	GO:0005515	NA	NA	Membrane function and transporters	other localisation
Ec-01_004690	Amino acid/polyamine transporter I	GO:0016020;GO:0003333;GO:0015171	CYTOPLASMIC_DOMAIN: Region of a membrane-bound protein predicted to be outside the membrane, in the cytoplasm.; NON_CYTOPLASMIC_DOMAIN: Region of a membrane-bound protein predicted to be outside the membrane, in the extracellular region; TMhelix: Region of a membrane-bound protein predicted to be embedded in the membrane.; IPR002293: Amino acid/polyamine transporter I; TRANSMEMBRANE: Region of a …	NA	Membrane function and transporters	signal peptide
Ec-01_004700	hypothetical protein	n/a;n/a;n/a	Coil:	NA	Unknown	other localisation
Ec-01_004710	Light harvesting complex protein	GO:0009765;GO:0016020	IPR022796: Chlorophyll A-B binding protein; IPR001344: Chlorophyll A-B binding protein, plant; IPR023329: Chlorophyll a/b binding protein domain	NA	Photosynthesis	other localisation
Ec-01_004720	Caffeate O-Methyltransferase	GO:0008168	IPR008576: Alpha-N-methyltransferase NTM1; IPR029063: S-adenosyl-L-methionine-dependent methyltransferase	KOG3178	Metabolism	other localisation
Ec-01_004730	Heat shock protein 40 like protein	GO:0031072	SSF48452: ; IPR001440: Tetratricopeptide TPR1; PF14559: Tetratricopeptide repeat; IPR011990: Tetratricopeptide-like helical domain; IPR001623: DnaJ domain; IPR018253: DnaJ domain, conserved site; PTHR24078: ; PF13414: TPR repeat; Coil: ; IPR013026: Tetratricopeptide repeat-containing domain; IPR019734: Tetratricopeptide repeat	NA	Stress response	other localisation
Ec-01_004740	Hypothetical protein	n/a;n/a;n/a	NA	NA	Unknown	other localisation
Ec-01_004750	Hypothetical protein	n/a;n/a;n/a	NON_CYTOPLASMIC_DOMAIN: Region of a membrane-bound protein predicted to be outside the membrane, in the extracellular region; SIGNAL_PEPTIDE: Signal peptide region; SIGNAL_PEPTIDE_N_REGION: N-terminal region of a signal peptide.; SIGNAL_PEPTIDE_H_REGION: Hydrophobic region of a signal peptide.; SignalP-TM: ; SIGNAL_PEPTIDE_C_REGION: C-terminal region of a signal peptide.	NA	Unknown	mitochondrion
Ec-01_004760	putative serine/threonine phosphatase 2C ptc2	GO:0005515	IPR008984: SMAD/FHA domain; IPR001932: PPM-type phosphatase domain; IPR015655: Protein phosphatase 2C; IPR000253: Forkhead-associated (FHA) domain	NA	Cellular regulation and signalling	other localisation
Ec-01_004770	Hypothetical protein	n/a;n/a;n/a	CYTOPLASMIC_DOMAIN: Region of a membrane-bound protein predicted to be outside the membrane, in the cytoplasm.; NON_CYTOPLASMIC_DOMAIN: Region of a membrane-bound protein predicted to be outside the membrane, in the extracellular region; TRANSMEMBRANE: Region of a membrane-bound protein predicted to be embedded in the membrane.	NA	Unknown	other localisation
Ec-01_004780	RNA recognition motif domain	GO:0003676	PTHR24012: ; CYTOPLASMIC_DOMAIN: Region of a membrane-bound protein predicted to be outside the membrane, in the cytoplasm.; NON_CYTOPLASMIC_DOMAIN: Region of a membrane-bound protein predicted to be outside the membrane, in the extracellular region; IPR000504: RNA recognition motif domain; IPR012677: Nucleotide-binding alpha-beta plait domain; TRANSMEMBRANE: Region of a membrane-bound protein pr…	NA	RNA modification or binding	other localisation
Ec-01_004800	WD40-repeat-containing domain	GO:0005515	PTHR22844:SF191: ; PTHR22844: ; IPR018247: EF-Hand 1, calcium-binding site; IPR019775: WD40 repeat, conserved site; IPR011992: EF-hand domain pair; IPR002048: EF-hand domain; IPR001680: WD40 repeat; IPR017986: WD40-repeat-containing domain; IPR015943: WD40/YVTN repeat-like-containing domain; Coil: ; IPR011047: Quinoprotein alcohol dehydrogenase-like superfamily	NA	Protein binding or modification	other localisation
Ec-01_004810	Calponin homology domain	GO:0005515	PTHR18959: ; IPR001715: Calponin homology domain; Coil: ; IPR003096: Smooth muscle protein/calponin	NA	Cytoskeleton and flagella	other localisation
Ec-01_004820	Protein kinase C-like, phorbol ester/diacylglycerol-binding domain	GO:0035556	SSF57889: ; IPR002219: Protein kinase C-like, phorbol ester/diacylglycerol-binding domain; SSF109993: ; G3DSA:3.30.60.20:	NA	Cellular regulation and signalling	other localisation
Ec-01_004830	FANCI helical domain 1	n/a;n/a;n/a	IPR029308: FANCI solenoid 1 domain; IPR026171: Fanconi anemia group I protein; IPR029310: FANCI helical domain 1; IPR029314: FANCI solenoid 4 domain; PTHR21818: ; Coil: ; IPR029315: FANCI solenoid 2 domain	NA	DNA or chromatin modification	other localisation
Ec-01_004840	conserved unknown protein	n/a;n/a;n/a	NA	NA	Unknown	other localisation
Ec-01_004850	conserved unknown protein	n/a;n/a;n/a	Coil:	NA	Unknown	other localisation
Ec-01_004860	S-adenosyl-L-methionine-dependent methyltransferase	n/a;n/a;n/a	PF12847: Methyltransferase domain; IPR029063: S-adenosyl-L-methionine-dependent methyltransferase; IPR026170: FAM173 family	NA	Metabolism	other localisation
Ec-01_004870	Zinc finger, HIT-type	n/a;n/a;n/a	PTHR13241: ; IPR007529: Zinc finger, HIT-type; SSF144232:	NA	Transcription	other localisation
Ec-01_004880	Thioredoxin-like fold	n/a;GO:0045454	SIGNAL_PEPTIDE: Signal peptide region; PS51257: Prokaryotic membrane lipoprotein lipid attachment site profile.; SIGNAL_PEPTIDE_N_REGION: N-terminal region of a signal peptide.; IPR013766: Thioredoxin domain; SIGNAL_PEPTIDE_C_REGION: C-terminal region of a signal peptide.; SignalP-TM: ; NON_CYTOPLASMIC_DOMAIN: Region of a membrane-bound protein predicted to be outside the membrane, in the extrace…	NA	Redox	signal peptide
Ec-01_004890	Ribonuclease CAF1	GO:0005634;GO:0003676	IPR006941: Ribonuclease CAF1; IPR012337: Ribonuclease H-like domain; PTHR15092:	NA	RNA modification or binding	other localisation
Ec-01_004900	Histone H4 acetyltransferase, NuA4 complex, Eaf6	n/a;n/a;n/a	Coil: ; PTHR13476: ; IPR015418: Histone H4 acetyltransferase, NuA4 complex, Eaf6	NA	DNA or chromatin modification	other localisation
Ec-01_004910	Vacuolar fusion protein MON1	n/a;n/a;n/a	IPR004353: Vacuolar fusion protein MON1	NA	Vesicle trafficking and secretion	other localisation
Ec-01_004920	ABC transporter-like	NA	CYTOPLASMIC_DOMAIN: Region of a membrane-bound protein predicted to be outside the membrane, in the cytoplasm.; IPR004147: UbiB domain; PTHR10566: ; NON_CYTOPLASMIC_DOMAIN: Region of a membrane-bound protein predicted to be outside the membrane, in the extracellular region; TMhelix: Region of a membrane-bound protein predicted to be embedded in the membrane.; IPR011009: Protein kinase-like domain…	NA	Membrane function and transporters	other localisation
Ec-01_004930	SET domain protein	GO:0005515	NA	NA	DNA or chromatin modification	signal peptide
Ec-01_004940	Mitogen-activated protein kinase kinase (MAP2K)	GO:0016772	IPR017441: Protein kinase, ATP binding site; IPR002290: Serine/threonine/dual specificity protein kinase, catalytic domain; G3DSA:3.30.200.20: ; PTHR24361:SF408: ; PTHR24361: ; IPR011009: Protein kinase-like domain; IPR008271: Serine/threonine-protein kinase, active site; IPR000719: Protein kinase domain; G3DSA:1.10.510.10: ; Coil:	KOG0581	Cellular regulation and signalling	other localisation
Ec-01_004950	hypothetical protein	n/a;n/a;n/a	IPR000048: IQ motif, EF-hand binding site	NA	Unknown	other localisation
Ec-01_004960	Ankyrin repeat-containing domain	n/a;n/a;n/a	IPR020683: Ankyrin repeat-containing domain; PTHR24198: ; IPR002110: Ankyrin repeat	NA	Membrane function and transporters	other localisation
Ec-01_004980	Folylpolyglutamate synthase, mitochondrial	GO:0004326;GO:0005524;GO:0009396	IPR023600: Folylpolyglutamate synthase, eukaryota; IPR013221: Mur ligase, central; IPR018109: Folylpolyglutamate synthetase, conserved site; IPR004101: Mur ligase, C-terminal; IPR001645: Folylpolyglutamate synthetase	NA	Metabolism	other localisation
Ec-01_004990	conserved unknown protein	n/a;n/a;n/a	NON_CYTOPLASMIC_DOMAIN: Region of a membrane-bound protein predicted to be outside the membrane, in the extracellular region; SIGNAL_PEPTIDE: Signal peptide region; SignalP-noTM: ; SIGNAL_PEPTIDE_N_REGION: N-terminal region of a signal peptide.; SIGNAL_PEPTIDE_H_REGION: Hydrophobic region of a signal peptide.; SignalP-TM: ; SIGNAL_PEPTIDE_C_REGION: C-terminal region of a signal peptide.	NA	Unknown	signal peptide
Ec-01_005000	Homoserine dehydrogenase	GO:0016597;GO:0008152;GO:0006520;GO:0055114	PTHR21499: ; SIGNAL_PEPTIDE_N_REGION: N-terminal region of a signal peptide.; IPR005106: Aspartate/homoserine dehydrogenase, NAD-binding; SignalP-TM: ; NON_CYTOPLASMIC_DOMAIN: Region of a membrane-bound protein predicted to be outside the membrane, in the extracellular region; SIGNAL_PEPTIDE_H_REGION: Hydrophobic region of a signal peptide.; IPR019811: Homoserine dehydrogenase, conserved site; SS…	KOG0455	Metabolism	other localisation
Ec-01_005010	expressed unknown protein	n/a;n/a;n/a	TMhelix: Region of a membrane-bound protein predicted to be embedded in the membrane.; SIGNAL_PEPTIDE: Signal peptide region; SIGNAL_PEPTIDE_N_REGION: N-terminal region of a signal peptide.; SignalP-TM: ; SIGNAL_PEPTIDE_C_REGION: C-terminal region of a signal peptide.; NON_CYTOPLASMIC_DOMAIN: Region of a membrane-bound protein predicted to be outside the membrane, in the extracellular region; Sig…	NA	Unknown	chloroplast
Ec-01_005020	DnaJ domain	GO:0031072	NON_CYTOPLASMIC_DOMAIN: Region of a membrane-bound protein predicted to be outside the membrane, in the extracellular region; SIGNAL_PEPTIDE: Signal peptide region; IPR001623: DnaJ domain; SIGNAL_PEPTIDE_N_REGION: N-terminal region of a signal peptide.; SIGNAL_PEPTIDE_H_REGION: Hydrophobic region of a signal peptide.; SignalP-TM: ; SIGNAL_PEPTIDE_C_REGION: C-terminal region of a signal peptide.	NA	Protein binding or modification	other localisation
Ec-01_005030	short-chain alcohol dehydrogenase-like protein	GO:0008152;GO:0016491	SSF51735: ; PTHR24322: ; IPR016040: NAD(P)-binding domain; IPR002347: Glucose/ribitol dehydrogenase; IPR002198: Short-chain dehydrogenase/reductase SDR	NA	Metabolism	other localisation
Ec-01_005040	DNA-directed RNA polymerase III subunit Rpc5	GO:0003899;GO:0005634;GO:0006351	IPR006886: DNA-directed RNA polymerase III subunit Rpc5; PTHR12069:	NA	Transcription	other localisation
Ec-01_005050	hypothetical protein	n/a;n/a;n/a	NA	NA	Unknown	other localisation
Ec-01_005060	Uncharacterised protein family UPF0136, Transmembrane	GO:0016020	CYTOPLASMIC_DOMAIN: Region of a membrane-bound protein predicted to be outside the membrane, in the cytoplasm.; NON_CYTOPLASMIC_DOMAIN: Region of a membrane-bound protein predicted to be outside the membrane, in the extracellular region; IPR005349: Uncharacterised protein family UPF0136, Transmembrane; TMhelix: Region of a membrane-bound protein predicted to be embedded in the membrane.; TRANSMEM…	NA	Unknown	signal peptide
Ec-01_005070	Renin receptor-like	GO:0004872;GO:0016021	SIGNAL_PEPTIDE: Signal peptide region; SIGNAL_PEPTIDE_N_REGION: N-terminal region of a signal peptide.; IPR012493: Renin receptor-like; SIGNAL_PEPTIDE_C_REGION: C-terminal region of a signal peptide.; SignalP-TM: ; CYTOPLASMIC_DOMAIN: Region of a membrane-bound protein predicted to be outside the membrane, in the cytoplasm.; NON_CYTOPLASMIC_DOMAIN: Region of a membrane-bound protein predicted to …	NA	Metabolism	signal peptide
Ec-01_005080	conserved unknown protein	n/a;n/a;n/a	Coil:	NA	Unknown	other localisation
Ec-01_005090	Dimeric alpha-beta barrel	n/a;n/a;n/a	IPR011008: Dimeric alpha-beta barrel; G3DSA:3.30.70.1060: ; IPR005545: YCII-related	NA	Metabolism	other localisation
Ec-01_005100	Ribonuclease Zc3h12a-like	NA	CYTOPLASMIC_DOMAIN: Region of a membrane-bound protein predicted to be outside the membrane, in the cytoplasm.; IPR021869: Ribonuclease Zc3h12a-like; NON_CYTOPLASMIC_DOMAIN: Region of a membrane-bound protein predicted to be outside the membrane, in the extracellular region; IPR002885: Pentatricopeptide repeat; PTHR13547: ; TRANSMEMBRANE: Region of a membrane-bound protein predicted to be embedde…	NA	RNA modification or binding	other localisation
Ec-01_005110	imidazoleglycerol-phosphate dehydratase	GO:0008152;GO:0016787	G3DSA:3.30.230.40: ; IPR006438: HAD hydrolase, TIGR01548 family; SIGNAL_PEPTIDE: Signal peptide region; PTHR23133: ; IPR006439: HAD hydrolase, subfamily IA; SIGNAL_PEPTIDE_N_REGION: N-terminal region of a signal peptide.; IPR023214: HAD-like domain; IPR000807: Imidazoleglycerol-phosphate dehydratase; SIGNAL_PEPTIDE_C_REGION: C-terminal region of a signal peptide.; IPR020565: Imidazoleglycerol-pho…	KOG3143	Metabolism	signal peptide
Ec-01_005120	hypothetical protein	n/a;n/a;n/a	Coil:	NA	Unknown	other localisation
Ec-01_005130	VRR-NUC domain	GO:0016788	PTHR15749: ; Coil: ; IPR014883: VRR-NUC domain	NA	DNA or chromatin modification	other localisation
Ec-01_005140	Transcription factor TFIIB	GO:0006352;GO:0006355;GO:0008270	IPR000812: Transcription factor TFIIB; IPR013137: Zinc finger, TFIIB-type; IPR013763: Cyclin-like; SSF57783: ; G3DSA:2.20.25.10:	NA	Transcription	other localisation
Ec-01_005150	Pentatricopeptide repeat	n/a;n/a;n/a	IPR011990: Tetratricopeptide-like helical domain; SIGNAL_PEPTIDE: Signal peptide region; SIGNAL_PEPTIDE_N_REGION: N-terminal region of a signal peptide.; PTHR24015: ; SIGNAL_PEPTIDE_C_REGION: C-terminal region of a signal peptide.; NON_CYTOPLASMIC_DOMAIN: Region of a membrane-bound protein predicted to be outside the membrane, in the extracellular region; IPR002885: Pentatricopeptide repeat; Sign…	NA	RNA modification or binding	signal peptide
Ec-01_005160	EsV-1-7 domain gene	NA	NA	NA	Cellular regulation and signalling	other localisation
Ec-01_005170	Hypothetical protein	n/a;n/a;n/a	NA	NA	Unknown	nd
Ec-01_005180	Tetratricopeptide-like helical domain	GO:0005515	SSF48452: ; PTHR19959: ; IPR011990: Tetratricopeptide-like helical domain; IPR027417: P-loop containing nucleoside triphosphate hydrolase; PF13374: Tetratricopeptide repeat; IPR019734: Tetratricopeptide repeat	NA	Protein binding or modification	other localisation
Ec-01_005190	Tetratricopeptide-like helical domain	GO:0005515	IPR003613: U box domain; IPR008984: SMAD/FHA domain; SSF57850: ; IPR011990: Tetratricopeptide-like helical domain; IPR013083: Zinc finger, RING/FYVE/PHD-type; PTHR22849: ; IPR000253: Forkhead-associated (FHA) domain	NA	Protein binding or modification	other localisation
Ec-01_005200	Pim1 homolog, ATP-dependent protease	GO:0004176;GO:0004252;GO:0006508	IPR027503: Lon protease homolog, chloroplastic/mitochondrial; IPR015947: PUA-like domain; IPR003959: ATPase, AAA-type, core; IPR004815: Lon protease, bacterial/eukaryotic-type; IPR008268: Peptidase S16, active site; IPR027417: P-loop containing nucleoside triphosphate hydrolase; IPR003111: Peptidase S16, lon N-terminal; IPR008269: Peptidase S16, Lon C-terminal; IPR003593: AAA+ ATPase domain; PR00…	NA	Proteolysis	mitochondrion
Ec-01_005210	hypothetical protein	n/a;n/a;n/a	Coil:	NA	Unknown	other localisation
Ec-01_005220	Ribokinase, bacterial	GO:0004747;GO:0006014	IPR011611: Carbohydrate kinase PfkB; IPR011877: Ribokinase, bacterial; SIGNAL_PEPTIDE: Signal peptide region; IPR002139: Ribokinase; SIGNAL_PEPTIDE_N_REGION: N-terminal region of a signal peptide.; SIGNAL_PEPTIDE_C_REGION: C-terminal region of a signal peptide.; NON_CYTOPLASMIC_DOMAIN: Region of a membrane-bound protein predicted to be outside the membrane, in the extracellular region; SIGNAL_PEP…	NA	Metabolism	signal peptide
Ec-01_005230	EsV-1-199	n/a;n/a;n/a	IPR020683: Ankyrin repeat-containing domain; PTHR24188: ; IPR002110: Ankyrin repeat	NA	Membrane function and transporters	other localisation
Ec-01_005240	Clathrin light chain	GO:0006886;GO:0030132;GO:0030130;GO:0005198;GO:0016192	IPR000996: Clathrin light chain; Coil:	NA	Vesicle trafficking and secretion	other localisation
Ec-01_005250	selenide, water dikinase also called selenophosphate synthase	GO:0055114;GO:0016491	IPR016188: PurM, N-terminal-like; IPR000728: AIR synthase related protein, N-terminal domain; PR00368: FAD-dependent pyridine nucleotide reductase signature; IPR001327: Pyridine nucleotide-disulphide oxidoreductase, NAD-binding domain; IPR010918: AIR synthase-related protein, C-terminal domain; G3DSA:3.50.50.60: ; IPR004536: Selenophosphate synthetase; PTHR22915: ; IPR023753: Pyridine nucleotide-…	KOG3939	Metabolism	other localisation
Ec-01_005260	Domain of unknown function DUF303, acetylesterase putative	n/a;n/a;n/a	IPR005181: Domain of unknown function DUF303, acetylesterase putative; IPR013830: SGNH hydrolase-type esterase domain; PTHR31988:	NA	Unknown	other localisation
Ec-01_005270	Domain of unknown function DUF303, acetylesterase putative	n/a;n/a;n/a	IPR005181: Domain of unknown function DUF303, acetylesterase putative; IPR013830: SGNH hydrolase-type esterase domain; PTHR31988:	NA	Unknown	other localisation
Ec-01_005280	aspartyl protease	GO:0006508;GO:0004194;GO:0004190	IPR021109: Aspartic peptidase domain; SIGNAL_PEPTIDE: Signal peptide region; PF14541: Xylanase inhibitor C-terminal; SIGNAL_PEPTIDE_N_REGION: N-terminal region of a signal peptide.; SignalP-TM: ; SIGNAL_PEPTIDE_C_REGION: C-terminal region of a signal peptide.; NON_CYTOPLASMIC_DOMAIN: Region of a membrane-bound protein predicted to be outside the membrane, in the extracellular region; SignalP-noTM…	KOG1339	Proteolysis	signal peptide
Ec-01_005290	Domain of unknown function DUF303, acetylesterase putative	n/a;n/a;n/a	IPR005181: Domain of unknown function DUF303, acetylesterase putative; SIGNAL_PEPTIDE: Signal peptide region; SIGNAL_PEPTIDE_N_REGION: N-terminal region of a signal peptide.; SignalP-TM: ; SIGNAL_PEPTIDE_C_REGION: C-terminal region of a signal peptide.; NON_CYTOPLASMIC_DOMAIN: Region of a membrane-bound protein predicted to be outside the membrane, in the extracellular region; SignalP-noTM: ; SIG…	NA	Unknown	signal peptide
Ec-01_005300	NUDIX hydrolase domain-like	GO:0016787	TMhelix: Region of a membrane-bound protein predicted to be embedded in the membrane.; CYTOPLASMIC_DOMAIN: Region of a membrane-bound protein predicted to be outside the membrane, in the cytoplasm.; IPR015797: NUDIX hydrolase domain-like; NON_CYTOPLASMIC_DOMAIN: Region of a membrane-bound protein predicted to be outside the membrane, in the extracellular region; PTHR22769: ; IPR020476: NUDIX hydr…	NA	Metabolism	signal anchor
Ec-01_005310	Gamma-tubulin complex component protein	GO:0005815;GO:0000922;GO:0000226	IPR007259: Gamma-tubulin complex component protein; Coil:	NA	Cytoskeleton and flagella	other localisation
Ec-01_005320	Predicted E3 ubiquitin ligase	GO:0008270	IPR031127: E3 ubiquitin ligase RBR family; IPR017907: Zinc finger, RING-type, conserved site; IPR001841: Zinc finger, RING-type; IPR002867: Zinc finger, C6HC-type; TMhelix: Region of a membrane-bound protein predicted to be embedded in the membrane.; CYTOPLASMIC_DOMAIN: Region of a membrane-bound protein predicted to be outside the membrane, in the cytoplasm.; NON_CYTOPLASMIC_DOMAIN: Region of a …	KOG1815	Proteolysis	other localisation
Ec-01_005330	Hypothetical protein	n/a;n/a;n/a	NA	NA	Unknown	nd
Ec-01_005340	Clathrin assembly complex, medium subunit	GO:0006810;GO:0006886;GO:0016192;GO:0030131	IPR028565: Mu homology domain; PTHR10529: ; IPR001392: Clathrin adaptor, mu subunit; G3DSA:3.30.450.60: ; G3DSA:2.60.40.1170: ; IPR022775: AP complex, mu/sigma subunit; IPR011012: Longin-like domain	KOG2740	Vesicle trafficking and secretion	other localisation
Ec-01_005350	conserved unknown protein	n/a;n/a;n/a	SignalP-noTM:	NA	Unknown	signal peptide
Ec-01_005360	Ferrochelatase-2, putative chloroplast precursor	GO:0004325;GO:0006783	SSF53800: ; SIGNAL_PEPTIDE: Signal peptide region; G3DSA:3.40.50.1400: ; SIGNAL_PEPTIDE_N_REGION: N-terminal region of a signal peptide.; SignalP-TM: ; SIGNAL_PEPTIDE_C_REGION: C-terminal region of a signal peptide.; NON_CYTOPLASMIC_DOMAIN: Region of a membrane-bound protein predicted to be outside the membrane, in the extracellular region; SignalP-noTM: ; IPR001015: Ferrochelatase; IPR019772: Fe…	NA	Metabolism	chloroplast
Ec-01_005370	Hypothetical protein	n/a;n/a;n/a	NA	NA	Unknown	other localisation
Ec-01_005380	Aminoalcohol phosphotransferase	GO:0016020;GO:0008654;GO:0016780	CYTOPLASMIC_DOMAIN: Region of a membrane-bound protein predicted to be outside the membrane, in the cytoplasm.; NON_CYTOPLASMIC_DOMAIN: Region of a membrane-bound protein predicted to be outside the membrane, in the extracellular region; TMhelix: Region of a membrane-bound protein predicted to be embedded in the membrane.; IPR000462: CDP-alcohol phosphatidyltransferase; IPR014472: Choline/ethanol…	KOG2877	Metabolism	signal anchor
Ec-01_005390	WD40 repeat	GO:0005515	IPR017986: WD40-repeat-containing domain; IPR019775: WD40 repeat, conserved site; PTHR22850: ; IPR001680: WD40 repeat; IPR015943: WD40/YVTN repeat-like-containing domain	NA	Protein binding or modification	other localisation
Ec-01_005400	hypothetical protein	n/a;n/a;n/a	IPR000048: IQ motif, EF-hand binding site	NA	Unknown	other localisation
Ec-01_005410	Hypothetical protein	n/a;n/a;n/a	NA	NA	Unknown	other localisation
Ec-01_005420	Major facilitator superfamily	GO:0016021;GO:0055085	TMhelix: Region of a membrane-bound protein predicted to be embedded in the membrane.; PTHR23504:SF18: ; CYTOPLASMIC_DOMAIN: Region of a membrane-bound protein predicted to be outside the membrane, in the cytoplasm.; IPR020846: Major facilitator superfamily domain; NON_CYTOPLASMIC_DOMAIN: Region of a membrane-bound protein predicted to be outside the membrane, in the extracellular region; PTHR235…	NA	Membrane function and transporters	signal peptide
Ec-01_005430	Tetracycline resistance protein, TetA/multidrug resistance protein MdtG	GO:0055085;GO:0016021;GO:0005886;GO:0005215	TMhelix: Region of a membrane-bound protein predicted to be embedded in the membrane.; PTHR24003: ; CYTOPLASMIC_DOMAIN: Region of a membrane-bound protein predicted to be outside the membrane, in the cytoplasm.; IPR020846: Major facilitator superfamily domain; NON_CYTOPLASMIC_DOMAIN: Region of a membrane-bound protein predicted to be outside the membrane, in the extracellular region; IPR001958: T…	NA	Membrane function and transporters	other localisation
Ec-01_005440	Arf GTPase activating protein	GO:0032312;GO:0008060;GO:0008270;GO:0005096	IPR001164: Arf GTPase activating protein; SSF57863: ; PTHR23180:	NA	Cellular regulation and signalling	other localisation
Ec-01_005450	EF-hand domain pair	GO:0005509	PTHR23050:SF195: ; IPR018247: EF-Hand 1, calcium-binding site; PTHR23050: ; IPR011992: EF-hand domain pair; IPR002048: EF-hand domain; IPR003961: Fibronectin type III; IPR013783: Immunoglobulin-like fold; IPR001202: WW domain; G3DSA:2.20.70.10:	NA	Cellular regulation and signalling	other localisation
Ec-01_005460	Ankyrin repeat-containing domain	n/a;n/a;n/a	IPR020683: Ankyrin repeat-containing domain; IPR001202: WW domain; PTHR24198: ; PF13857: Ankyrin repeats (many copies); IPR002110: Ankyrin repeat	NA	Membrane function and transporters	other localisation
Ec-01_005470	putative: flagellar/basal body protein, PACRG (parkin co-regulated gene) -like protein	n/a;n/a;n/a	PTHR21207: ; IPR019399: Parkin co-regulated protein	KOG3961	Cytoskeleton and flagella	other localisation
Ec-01_005480	Small-subunit processome, Utp11	GO:0032040;GO:0006364	IPR007144: Small-subunit processome, Utp11; Coil:	NA	Protein synthesis	other localisation
Ec-01_005490	Ubiquitin fusion degradation protein UFD1	GO:0006511	SIGNAL_PEPTIDE: Signal peptide region; SIGNAL_PEPTIDE_N_REGION: N-terminal region of a signal peptide.; IPR004854: Ubiquitin fusion degradation protein UFD1; SIGNAL_PEPTIDE_C_REGION: C-terminal region of a signal peptide.; SignalP-TM: ; NON_CYTOPLASMIC_DOMAIN: Region of a membrane-bound protein predicted to be outside the membrane, in the extracellular region; SignalP-noTM: ; Coil: ; SIGNAL_PEPTI…	NA	Proteolysis	signal peptide
Ec-01_005500	Alpha-ketoglutarate-dependent dioxygenase AlkB-like	GO:0016491;n/a	SSF51197: ; IPR005123: Oxoglutarate/iron-dependent dioxygenase; PTHR13069: ; IPR027450: Alpha-ketoglutarate-dependent dioxygenase AlkB-like	NA	Metabolism	other localisation
Ec-01_005510	enoyl-CoA hydratase domain-containing protein	GO:0008152;GO:0003824	IPR018376: Enoyl-CoA hydratase/isomerase, conserved site; IPR029045: ClpP/crotonase-like domain; IPR001753: Crotonase superfamily; PTHR11941:	KOG1680	Metabolism	other localisation
Ec-01_005520	conserved unknown protein	n/a;n/a;n/a	IPR021827: Nucleoporin Nup186/Nup192/Nup205; CYTOPLASMIC_DOMAIN: Region of a membrane-bound protein predicted to be outside the membrane, in the cytoplasm.; NON_CYTOPLASMIC_DOMAIN: Region of a membrane-bound protein predicted to be outside the membrane, in the extracellular region; TRANSMEMBRANE: Region of a membrane-bound protein predicted to be embedded in the membrane.	NA	Unknown	other localisation
Ec-01_005530	Nucleoporin Nup186/Nup192/Nup205	GO:0005643	IPR021827: Nucleoporin Nup186/Nup192/Nup205; PTHR31344:	NA	Membrane function and transporters	other localisation
Ec-01_005540	expressed unknown protein	n/a;GO:0005515	IPR000225: Armadillo	NA	Unknown	other localisation
Ec-01_005550	5-oxoprolinase (ATP-hydrolysing)	NA	PTHR11365: ; IPR003692: Hydantoinase B/oxoprolinase; IPR002821: Hydantoinase/oxoprolinase; IPR008040: Hydantoinaseoxoprolinase, N-terminal	NA	Metabolism	other localisation
Ec-01_005560	Dimethylaniline monooxygenase, N-oxide-forming	GO:0050661;GO:0050660;GO:0004499;GO:0055114	IPR000960: Flavin monooxygenase FMO; IPR012143: Dimethylaniline monooxygenase, N-oxide-forming; G3DSA:3.50.50.60: ; PTHR23023: ; IPR020946: Flavin monooxygenase-like; SSF51905:	NA	Metabolism	other localisation
[truncated: 15,172 more rows]
