# Supplementary figures and images for: Convergent recruitment of TALE homeodomain life cycle regulators to direct sporophyte development in land plants and brown algae
Source: eLife journal article supplement (doi:10.7554/elife.43101), 2019-01-15

*sam-2* mutant

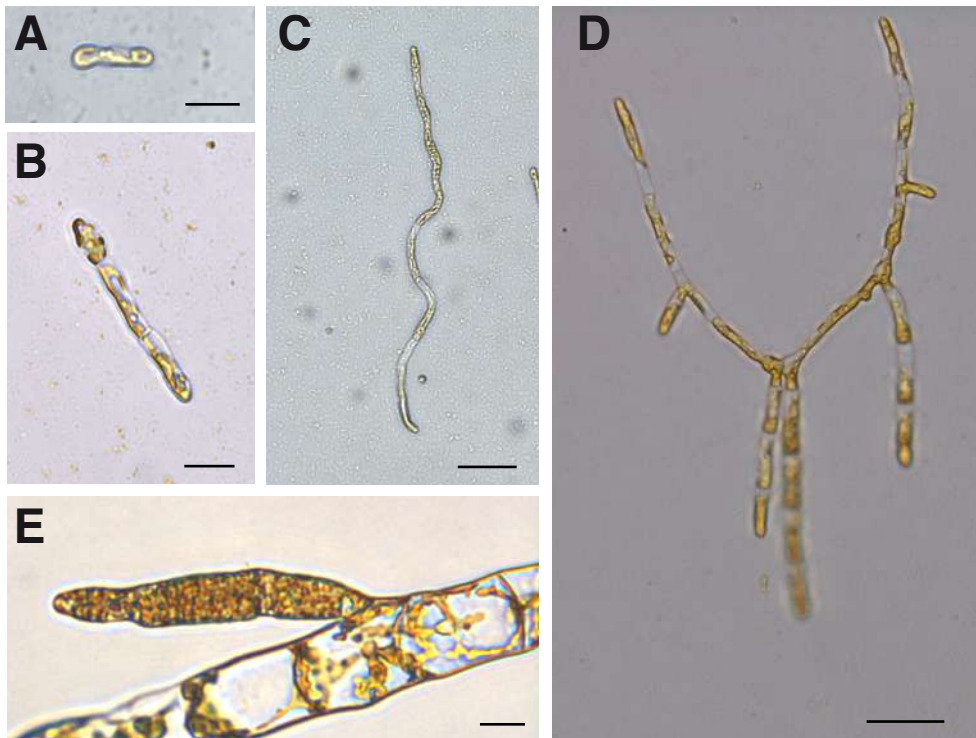

*sam-3* mutant

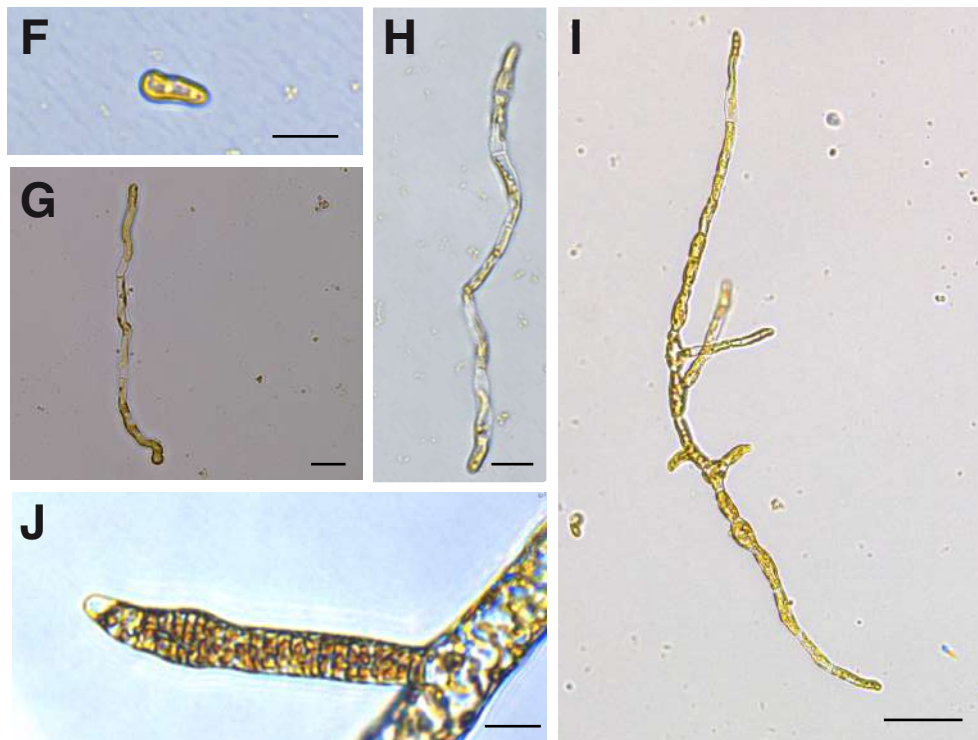

Supplement: supp [file elife-43101-supp-v1.zip]
